# Supplementary material for: Stable N-heterocyclic borylenes with promising ligand properties: a contribution from theory
Source: Royal Society of Chemistry journal article supplement (doi:10.1039/d2qi01511k), 2022-01-01
Supplement: d2qi01511k1.pdf [file d2qi01511k1.pdf]

# Electronic Supplementary Information (ESI)

## Stable *N*-Heterocyclic Borylenes with Promising Ligand Properties: A

### Contribution from Theory

Bijoy Ghosh,<sup>a</sup> Jorge Juan Cabrera-Trujillo,<sup>b</sup> Israel Fernández,<sup>\*b</sup> and Ashwini K. Phukan<sup>\*a</sup>

<sup>a</sup>Department of Chemical Sciences, Tezpur University, Napaam 784028, Assam, India.

E-Mail: [ashwini@tezu.ernet.in](mailto:ashwini@tezu.ernet.in)

<sup>b</sup>Departamento de Química Orgánica I and Centro de Innovación en Química Avanzada (ORFEO-CINQA), Facultad de Ciencias Químicas, Universidad Complutense de Madrid, 28040-

Madrid, Spain

E-mail: [israel@quim.ucm.es](mailto:israel@quim.ucm.es)

|                 |                                                                                                                                                                                                                                                                                                                                                                                                                                                     |    |
|-----------------|-----------------------------------------------------------------------------------------------------------------------------------------------------------------------------------------------------------------------------------------------------------------------------------------------------------------------------------------------------------------------------------------------------------------------------------------------------|----|
| <b>Table S1</b> | Calculated (M06-D3/Def2-TZVP (Toluene)) Mulliken spin densities at the central boron atom and $\alpha$ -nitrogen and carbon atoms (w.r.t. the central boron atom) of the triplet states for <b>1-9</b> .                                                                                                                                                                                                                                            | 6  |
| <b>Table S2</b> | Calculated singlet-triplet energy separation values ( $\Delta E_{S-T}$ , in kcal mol <sup>-1</sup> ) for <b>1-9</b> with different functionals.                                                                                                                                                                                                                                                                                                     | 6  |
| <b>Table S3</b> | Calculated (M06-D3/Def2-TZVP (Toluene)) hydrogenation energy values (in kcal mol <sup>-1</sup> ) for <b>1-9</b> in their singlet and triplet states. The difference in the calculated hydrogenation energy values for the singlet and triplet states ( $\Delta E_{Hydro}$ ) of <b>1-9</b> are given in kcal mol <sup>-1</sup> .                                                                                                                     | 7  |
| <b>Table S4</b> | Calculated (M06-D3/Def2-TZVP (Toluene)) important geometrical parameters, natural charges at the pseudo hydridic hydrogen ( $H^{\delta-}$ ) and positively polarized hydrogen atom ( $H^{\delta+}$ ) and occupancies of the formally vacant $p_{\pi}$ orbital centered at the central E atom (E = B, Al, Ga and C) for the transition state involved in the activation of H <sub>2</sub> by <b>4-7, 9, II, IIIa</b> and <b>IIIb</b> .               | 8  |
| <b>Table S5</b> | Calculated (M06-D3/Def2-TZVP (Toluene)) important geometrical parameters, natural charges at the nitrogen atom of the pseudo amide fragment ( $NH_2^{\delta-}$ ), positively polarized hydrogen atom ( $H^{\delta+}$ ) and occupancies of the formally vacant $p_{\pi}$ orbital centered at the central E (E = B and C) atom for the transition state involved in the activation of NH <sub>3</sub> by <b>4-7, 9</b> and <b>II</b> .                | 9  |
| <b>Table S6</b> | Calculated (M06-D3/Def2-TZVP (Toluene)) important geometrical parameters, natural charges at the carbon atom of the $CH_3^{\delta-}$ fragment, positively polarized hydrogen atom ( $H^{\delta+}$ ) and occupancies of the formally vacant $p_{\pi}$ orbital centered at the central E (E = B and C) atom for the transition state involved in the activation of CH <sub>4</sub> by <b>4-7, 9</b> , and <b>II</b> via $\sigma_{CH_2}$ approach.     | 10 |
| <b>Table S7</b> | Calculated (M06-D3/Def2-TZVP (Toluene)) important geometrical parameters, natural charges at the carbon atom of the $CH_3^{\delta-}$ fragment, positively polarized hydrogen atom ( $H^{\delta+}$ ) and occupancies of the formally vacant $p_{\pi}$ orbital centered at the central E (E = B and C) atom for the transition state involved in the activation of CH <sub>4</sub> by <b>4-7, 9</b> and <b>II</b> via inverted $\pi_{CH_2}$ approach. | 11 |
| <b>Table S8</b> | Calculated (M06-D3/Def2-TZVP (Toluene)) important geometrical parameters, natural charges at the fluoride atom ( $F^{\delta-}$ ) and carbon atom of the C <sub>6</sub> H <sub>5</sub> fragment and occupancies of the formally vacant $p_{\pi}$ orbital centered at the central E atom (E = B and Al) for the transition state involved in the activation of the C – F bond of C <sub>6</sub> H <sub>5</sub> F by <b>4-7, 9</b>                     | 12 |

and **IIIa**.

|                  |                                                                                                                                                                                                                                                                                                                                                                                                                                                                                                |       |
|------------------|------------------------------------------------------------------------------------------------------------------------------------------------------------------------------------------------------------------------------------------------------------------------------------------------------------------------------------------------------------------------------------------------------------------------------------------------------------------------------------------------|-------|
| <b>Table S9</b>  | Calculated (M06-D3/Def2-TZVP (Toluene)) important geometrical parameters, natural charges at the hydrogen atom ( $H^{\delta+}$ ) and carbon atom of the $C_6H_5$ fragment and occupancies of the formally vacant $p_\pi$ orbital centered at the central E atom ( $E = B$ ) for the transition state involved in the activation of the <i>para</i> C–H bond of $C_6H_5F$ by <b>4-7</b> and <b>9</b>                                                                                            | 12    |
| <b>Table S10</b> | Calculated (M06-D3/Def2-TZVP (Toluene)) important geometrical parameters, natural charges at the hydrogen atom ( $H^{\delta+}$ ) and carbon atom of the $C_6H_5$ fragment and occupancies of the formally vacant $p_\pi$ orbital centered at the central E atom ( $E = B$ ) for the transition state involved in the activation of the <i>meta</i> C–H bond of $C_6H_5F$ by <b>4-7</b> and <b>9</b>                                                                                            | 13    |
| <b>Table S11</b> | Calculated (M06-D3/Def2-TZVP (Toluene)) important geometrical parameters, natural charges at the hydrogen atom ( $H^{\delta+}$ ) and carbon atom of the $C_6H_5$ fragment and occupancies of the formally vacant $p_\pi$ orbital centered at the central E atom ( $E = B$ ) for the transition state involved in the activation of the <i>ortho</i> C–H bond of $C_6H_5F$ by <b>4-7</b> and <b>9</b> . The bond lengths and bond angles are given in Å and in degree ( $^\circ$ ) respectively | 13    |
| <b>Table S12</b> | Calculated (M06-D3/Def2-TZVP(toluene)) activation energy barriers and reaction free energies (in $\text{kcal mol}^{-1}$ ) for the activation of the C–H ( <i>para</i> , <i>meta</i> and <i>ortho</i> ) bond of $C_6H_5F$ by <b>4-7</b> and <b>9</b> .                                                                                                                                                                                                                                          | 14    |
| <b>Table S13</b> | Calculated activation energy barriers and reaction free energies (in $\text{kcal mol}^{-1}$ ) for the formation of the E–H ( $E = H, N$ and $C$ ) and C–F bond splitting products obtained for <b>4-9</b> with different functionals.                                                                                                                                                                                                                                                          | 14    |
| <b>Fig. S1</b>   | Pictorial representation of singlet state optimized geometry of <b>1-9</b> calculated at M06-D3/Def2-TZVP (Toluene) level of theory. Bond lengths and bond angles are given in Å and degree ( $^\circ$ ) respectively. The occupancy of the formally vacant $p_\pi$ orbital centered at the boron atom for <b>1-9</b> are given within parenthesis.                                                                                                                                            | 15    |
| <b>Fig. S2</b>   | Mulliken spin density plots for the triplet states of <b>1-9</b> calculated at M06-D3/Def2-TZVP (Toluene) level of theory. The spin density values at the central boron atom are given within parenthesis.                                                                                                                                                                                                                                                                                     | 17    |
| <b>Fig. S3</b>   | Pictorial representation of the occupied $\pi$ -symmetric molecular orbitals (along with their energies in eV) for <b>1</b> , <b>4-6</b> calculated at the M06-D3/Def2-TZVP (Toluene) level of theory.                                                                                                                                                                                                                                                                                         | 18    |
| <b>Fig. S4</b>   | Pictorial representation of the $\sigma$ -symmetric donor and $\pi$ -symmetric                                                                                                                                                                                                                                                                                                                                                                                                                 | 19-21 |

acceptor orbitals (along with their energies in eV) concentrated at the boron atom for **1-9**. (M06-D3/Def2-TZVP (Toluene))

|                 |                                                                                                                                                                                                                                                                                    |       |
|-----------------|------------------------------------------------------------------------------------------------------------------------------------------------------------------------------------------------------------------------------------------------------------------------------------|-------|
| <b>Fig. S5</b>  | Correlation plot between proton affinity (PA, in kcal mol <sup>-1</sup> ) and E <sub>σ</sub> (in eV) values for <b>1-9</b> .                                                                                                                                                       | 22    |
| <b>Fig. S6</b>  | Optimized geometries of the transition states (TS) involved in the activation of dihydrogen by <b>4-7</b> , <b>9</b> , <b>II</b> , <b>IIIa</b> and <b>IIIb</b> (bond lengths are given in Å) at M06-D3/Def2-TZVP (Toluene) level of theory.                                        | 23    |
| <b>Fig. S7</b>  | Optimized geometries of the TSs involved in the activation of NH <sub>3</sub> by <b>4-7</b> , <b>9</b> and <b>II</b> (bond lengths are given in Å) at M06-D3/Def2-TZVP (Toluene) level of theory.                                                                                  | 24-25 |
| <b>Fig. S8</b>  | Some structures along the reaction pathway obtained from the IRC calculation (M06-D3/Def2-TZVP (Toluene)) for the activation of N–H bond of ammonia by <b>6</b> (bond lengths are given in Å).                                                                                     | 26    |
| <b>Fig. S9</b>  | Pictorial representation of the molecular orbital showing the orientation of the amino lone pair for the transition states (TS) involved in the activation of NH <sub>3</sub> by <b>4-7</b> , <b>9</b> and <b>II</b> at M06-D3/Def2-TZVP (Toluene) level of theory.                | 27-28 |
| <b>Fig. S10</b> | Comparative activation strain diagrams for the H <sub>2</sub> -activation reactions mediated by <b>4</b> (solid lines) and <b>II</b> (dotted lines) along the reaction coordinate projected onto the breaking H···H bond distance.                                                 | 29    |
| <b>Fig. S11</b> | Optimized geometries of the transition states (TS) involved in the activation of C–H bond of CH <sub>4</sub> by <b>4-7</b> , <b>9</b> and <b>II</b> (bond lengths are given in Å) via σ <sub>CH<sub>2</sub></sub> approach at M06-D3/Def2-TZVP (Toluene) level of theory.          | 30-31 |
| <b>Fig. S12</b> | Optimized geometries of the transition states (TS) involved in the activation of C–H bond of CH <sub>4</sub> by <b>4-7</b> , <b>9</b> and <b>II</b> (bond lengths are given in Å) via inverted π <sub>CH<sub>2</sub></sub> approach at M06-D3/Def2-TZVP (Toluene) level of theory. | 32-33 |
| <b>Fig. S13</b> | Some structures along the reaction pathway obtained from the IRC calculation (M06-D3/Def2-TZVP (Toluene)) for the activation of methane by <b>5</b> (bond lengths are given in Å) via σ <sub>CH<sub>2</sub></sub> approach.                                                        | 34    |
| <b>Fig. S14</b> | Some structures along the reaction pathway obtained from the IRC calculation (M06-D3/Def2-TZVP (Toluene)) for the activation of methane by <b>5</b> (bond lengths are given in Å) via inverted π <sub>CH<sub>2</sub></sub> approach.                                               | 35    |
| <b>Fig. S15</b> | Optimized geometries of the transition states (TS) involved in the                                                                                                                                                                                                                 | 36-37 |

|                 |                                                                                                                                                                                                                                                   |        |
|-----------------|---------------------------------------------------------------------------------------------------------------------------------------------------------------------------------------------------------------------------------------------------|--------|
|                 | activation of C–F bond of C <sub>6</sub> H <sub>5</sub> F by <b>4-7</b> , <b>9</b> and <b>IIIa</b> (bond lengths are given in Å) at M06-D3/Def2-TZVP (Toluene) level of theory.                                                                   |        |
| <b>Fig. S16</b> | Some structures along the reaction pathway obtained from the IRC calculation (M06-D3/Def2-TZVP (Toluene)) for the activation of C–F bond of C <sub>6</sub> H <sub>5</sub> F by <b>6</b> (bond lengths are given in Å).                            | 38     |
| <b>Fig. S17</b> | Optimized geometries of the transition states (TS) involved in the activation of <i>para</i> C–H bond of C <sub>6</sub> H <sub>5</sub> F by <b>4-7</b> and <b>9</b> (bond lengths are given in Å) at M06-D3/Def2-TZVP (Toluene) level of theory.  | 39-40  |
| <b>Fig. S18</b> | Optimized geometries of the transition states (TS) involved in the activation of <i>meta</i> C–H bond of C <sub>6</sub> H <sub>5</sub> F by <b>4-7</b> and <b>9</b> (bond lengths are given in Å) at M06-D3/Def2-TZVP (Toluene) level of theory.  | 41-42  |
| <b>Fig. S19</b> | Optimized geometries of the transition states (TS) involved in the activation of <i>ortho</i> C–H bond of C <sub>6</sub> H <sub>5</sub> F by <b>4-7</b> and <b>9</b> (bond lengths are given in Å) at M06-D3/Def2-TZVP (Toluene) level of theory. | 43-44  |
| <b>Fig. S20</b> | Optimized geometries of the H–H splitting product obtained for the molecules <b>4-7</b> , <b>9</b> , <b>II</b> , <b>IIIa</b> and <b>IIIb</b> at M06-D3/Def2-TZVP (Toluene) level of theory.                                                       | 45-46  |
| <b>Fig. S21</b> | Optimized geometries of the C–H splitting product obtained for the molecules <b>4-7</b> , <b>9</b> and <b>II</b> at M06-D3/Def2-TZVP (Toluene) level of theory.                                                                                   | 47     |
| <b>Fig. S22</b> | Optimized geometries of the N–H splitting product obtained for the molecules <b>4-7</b> , <b>9</b> and <b>II</b> at M06-D3/Def2-TZVP (Toluene) level of theory.                                                                                   | 48-49  |
| <b>Fig. S23</b> | Optimized geometries of the C–F splitting product obtained for the molecules <b>4-7</b> , <b>9</b> and <b>IIIa</b> at M06-D3/Def2-TZVP (Toluene) level of theory.                                                                                 | 50     |
| <b>Fig. S24</b> | Optimized geometries of the <i>para</i> C–H splitting product obtained for the molecules <b>4-7</b> and <b>9</b> at M06-D3/Def2-TZVP (Toluene) level of theory.                                                                                   | 51     |
| <b>Fig. S25</b> | Optimized geometries of the <i>meta</i> C–H splitting product obtained for the molecules <b>4-7</b> and <b>9</b> at M06-D3/Def2-TZVP (Toluene) level of theory.                                                                                   | 52     |
| <b>Fig. S26</b> | Optimized geometries of the <i>ortho</i> C–H splitting product obtained for the molecules <b>4-7</b> and <b>9</b> at M06-D3/Def2-TZVP (Toluene) level of theory.                                                                                  | 53     |
|                 | Cartesian coordinates of all calculated geometries                                                                                                                                                                                                | 54-206 |

**Table S1** Calculated (M06-D3/Def2-TZVP (Toluene)) Mulliken spin densities at the central boron atom and  $\alpha$ -nitrogen and carbon atoms (w.r.t. the central boron atom) of the triplet states for **1-9**.

| <b>Molecules</b> | <b>B</b> | <b>N<math>\alpha</math></b> | <b>C<math>\alpha</math>/N<math>\alpha</math></b> |
|------------------|----------|-----------------------------|--------------------------------------------------|
| <b>1</b>         | 0.586    | 0.058                       | 0.259                                            |
| <b>2</b>         | 1.056    | -0.050                      | 0.002                                            |
| <b>3</b>         | 1.061    | -0.068                      | 0.049                                            |
| <b>4</b>         | 1.675    | 0.015                       | 0.123                                            |
| <b>5</b>         | 1.675    | -0.018                      | 0.086                                            |
| <b>6</b>         | 1.613    | -0.057                      | -0.015                                           |
| <b>7</b>         | 1.270    | -0.024                      | -0.087                                           |
| <b>8</b>         | 1.003    | -0.007                      | -0.042                                           |
| <b>9</b>         | 1.036    | -0.056                      | -0.035                                           |

**Table S2** Calculated singlet-triplet energy separation values ( $\Delta E_{S-T}$ , in kcal mol<sup>-1</sup>) for **1-9** with different functionals.

| <b>Molecules</b> | <b><math>\Delta E_{S-T}</math></b> |             |                                 |               |
|------------------|------------------------------------|-------------|---------------------------------|---------------|
|                  | <b>M06</b>                         | <b>PBE0</b> | <b><math>\omega</math>B97XD</b> | <b>B3PW91</b> |
| <b>1</b>         | 15.7                               | 13.0        | 16.1                            | 13.3          |
| <b>2</b>         | 8.5                                | 4.0         | 8.5                             | 4.4           |
| <b>3</b>         | 14.3                               | 11.0        | 14.7                            | 11.8          |
| <b>4</b>         | 36.1                               | 30.7        | 40.2                            | 30.3          |
| <b>5</b>         | 31.5                               | 25.8        | 31.8                            | 26.4          |
| <b>6</b>         | 42.3                               | 37.8        | 43.6                            | 38.1          |
| <b>7</b>         | 25.5                               | 21.9        | 25.4                            | 21.7          |
| <b>8</b>         | 19.2                               | 15.2        | 17.9                            | 15.1          |
| <b>9</b>         | 31.6                               | 28.1        | 31.2                            | 27.9          |

**Table S3** Calculated (M06-D3/Def2-TZVP (Toluene)) hydrogenation energy values (in kcal mol<sup>-1</sup>) for **1-9** in their singlet and triplet states. The difference in the calculated hydrogenation energy values for the singlet and triplet states ( $\Delta E_{\text{Hydro}}$ ) of **1-9** are given in kcal mol<sup>-1</sup>.

| Molecule | Hydrogenation Energy |         | $\Delta E_{\text{Hydro}}$ |
|----------|----------------------|---------|---------------------------|
|          | Singlet              | Triplet |                           |
| <b>1</b> | 53.9                 | 38.2    | 15.7                      |
| <b>2</b> | 29.8                 | 21.3    | 8.5                       |
| <b>3</b> | 48.3                 | 33.9    | 14.4                      |
| <b>4</b> | 51.8                 | 15.6    | 36.2                      |
| <b>5</b> | 38.8                 | 7.3     | 31.5                      |
| <b>6</b> | 46.9                 | 4.5     | 42.4                      |
| <b>7</b> | 39.8                 | 14.3    | 25.5                      |
| <b>8</b> | 46.6                 | 27.4    | 19.2                      |
| <b>9</b> | 44.6                 | 13.0    | 31.6                      |

**Table S4** Calculated (M06-D3/Def2-TZVP (Toluene)) important geometrical parameters, natural charges at the pseudo hydridic hydrogen ( $H^{\delta-}$ ) and positively polarized hydrogen atom ( $H^{\delta+}$ ) and occupancies of the formally vacant  $p_{\pi}$  orbital centered at the central E atom (E = B, Al, Ga and C) for the transition state involved in the activation of  $H_2$  by **4-7**, **9**, **II**, **IIIa** and **IIIb**. The bond lengths and bond angles are given in Å and in degree ( $^{\circ}$ ) respectively. The Wiberg Bond Index values (WBI) are given within parenthesis (X = C and N).

| Molecules                    | $H^{\delta+}-H^{\delta-}$ | $E-H^{\delta-}$  | $E-H^{\delta+}$  | E-X                            | $\angle N-E-X$ | $q_{H^{\delta-}}$ | $q_{H^{\delta+}}$ | Occ $p_{\pi}$ |
|------------------------------|---------------------------|------------------|------------------|--------------------------------|----------------|-------------------|-------------------|---------------|
| <b>II-TS<sup>H-H</sup></b>   | 1.076<br>(0.315)          | 1.950<br>(0.465) | 1.213<br>(0.621) | 1.325/1.502<br>(1.298)/(0.997) | 108.0          | -0.196            | 0.185             | 0.756         |
| <b>IIIa-TS<sup>H-H</sup></b> | 1.266<br>(0.228)          | 1.973<br>(0.689) | 1.591<br>(0.721) | 1.890/1.890<br>(0.356)/(0.356) | 96.9           | -0.250            | -0.159            | 0.511         |
| <b>IIIb-TS<sup>H-H</sup></b> | 1.398<br>(0.167)          | 1.994<br>(0.727) | 1.556<br>(0.773) | 1.948/1.948<br>(0.404)/(0.404) | 96.0           | -0.269            | -0.097            | 0.552         |
| <b>4TS<sup>H-H</sup></b>     | 1.035<br>(0.457)          | 2.482<br>(0.324) | 1.525<br>(0.523) | 1.488/1.537<br>(0.769)/(1.082) | 98.3           | -0.380            | -0.030            | 0.404         |
| <b>5TS<sup>H-H</sup></b>     | 0.894<br>(0.480)          | 1.865<br>(0.468) | 1.420<br>(0.499) | 1.495/1.632<br>(0.751)/(0.800) | 99.0           | -0.046            | 0.021             | 0.452         |
| <b>6TS<sup>H-H</sup></b>     | 1.073<br>(0.349)          | 2.180<br>(0.467) | 1.361<br>(0.628) | 1.477/1.480<br>(0.769)/(0.830) | 99.7           | -0.269            | -0.019            | 0.425         |
| <b>7TS<sup>H-H</sup></b>     | 0.922<br>(0.422)          | 1.787<br>(0.518) | 1.367<br>(0.561) | 1.564/1.496<br>(0.650)/(0.774) | 99.0           | -0.034            | 0.034             | 0.497         |
| <b>9TS<sup>H-H</sup></b>     | 1.035<br>(0.365)          | 2.108<br>(0.505) | 1.368<br>(0.615) | 1.440/1.574<br>(0.839)/(0.620) | 98.1           | -0.217            | -0.023            | 0.462         |



**Table S5** Calculated (M06-D3/Def2-TZVP (Toluene)) important geometrical parameters, natural charges at the nitrogen atom of the pseudo amide fragment ( $\text{NH}_2^{\delta-}$ ), positively polarized hydrogen atom ( $\text{H}^{\delta+}$ ) and occupancies of the formally vacant  $p_\pi$  orbital centered at the central E (E = B and C) atom for the transition state involved in the activation of  $\text{NH}_3$  by **4-7**, **9** and **II**. The bond lengths and bond angles are given in Å and in degree ( $^\circ$ ) respectively. The Wiberg Bond Index values (WBI) are given within parenthesis (X = C and N).

| Molecules                  | $\text{H}^{\delta+}-\text{H}_2\text{N}^{\delta-}$ | $\text{E}-\text{NH}_2^{\delta-}$ | $\text{E}-\text{H}^{\delta+}$ | E-X                            | $\angle\text{N-E-X}$ | $q_{\text{NH}_2^{\delta-}}$ | $q_{\text{H}^{\delta+}}$ | Occ $p_\pi$ |
|----------------------------|---------------------------------------------------|----------------------------------|-------------------------------|--------------------------------|----------------------|-----------------------------|--------------------------|-------------|
| <b>II-TS<sup>N-H</sup></b> | 1.542<br>(0.177)                                  | 2.428<br>(0.401)                 | 1.156<br>(0.695)              | 1.314/1.496<br>(1.378)/(0.995) | 109.5                | -1.165                      | 0.324                    | 0.792       |
| <b>4TS<sup>N-H</sup></b>   | 1.397<br>(0.286)                                  | 2.833<br>(0.190)                 | 1.495<br>(0.660)              | 1.492/1.528<br>(0.738)/(1.107) | 98.4                 | -1.277                      | 0.166                    | 0.586       |
| <b>5TS<sup>N-H</sup></b>   | 1.416<br>(0.277)                                  | 2.731<br>(0.301)                 | 1.406<br>(0.678)              | 1.454/1.626<br>(0.823)/(0.768) | 100.1                | -1.224                      | 0.155                    | 0.275       |
| <b>6TS<sup>N-H</sup></b>   | 1.490<br>(0.242)                                  | 2.745<br>(0.290)                 | 1.490<br>(0.712)              | 1.467/1.467<br>(0.809)/(0.878) | 99.7                 | -1.241                      | 0.148                    | 0.445       |
| <b>7TS<sup>N-H</sup></b>   | 1.446<br>(0.256)                                  | 2.700<br>(0.320)                 | 1.364<br>(0.709)              | 1.451/1.541<br>(0.883)/(0.662) | 99.3                 | -1.222                      | 0.153                    | 0.608       |
| <b>9TS<sup>N-H</sup></b>   | 1.453<br>(0.253)                                  | 2.743<br>(0.290)                 | 1.376<br>(0.707)              | 1.421/1.558<br>(0.918)/(0.639) | 98.5                 | -1.236                      | 0.147                    | 0.312       |

**Table S6** Calculated (M06-D3/Def2-TZVP (Toluene)) important geometrical parameters, natural charges at the carbon atom of the  $\text{CH}_3^{\delta-}$  fragment, positively polarized hydrogen atom ( $\text{H}^{\delta+}$ ) and occupancies of the formally vacant  $p_\pi$  orbital centered at the central E (E = B and C) atom for the transition state involved in the activation of  $\text{CH}_4$  by **4-7**, **9**, and **II** via  $\sigma_{\text{CH}_2}$  approach. The bond lengths and bond angles are given in Å and in degree ( $^\circ$ ) respectively. The Wiberg Bond Index values (WBI) are given within parenthesis (X = C and N).

| Molecules                  | $\text{H}^{\delta+}-\text{H}_3\text{C}^{\delta-}$ | $\text{E}-\text{CH}_3^{\delta-}$ | $\text{E}-\text{H}^{\delta+}$ | $\text{E}-\text{X}$            | $\angle\text{N-E-X}$ | $q_{\text{CH}_3^{\delta-}}$ | $q_{\text{H}^{\delta+}}$ | $\text{Occ}_{p_\pi}$ |
|----------------------------|---------------------------------------------------|----------------------------------|-------------------------------|--------------------------------|----------------------|-----------------------------|--------------------------|----------------------|
| <b>II-TS<sup>C-H</sup></b> | 1.557<br>(0.224)                                  | 2.343<br>(0.518)                 | 1.167<br>(0.674)              | 1.338/1.502<br>(1.247)/(0.995) | 108.0                | -0.827                      | 0.277                    | 0.832                |
| <b>4TS<sup>C-H</sup></b>   | 1.540<br>(0.339)                                  | 2.959<br>(0.271)                 | 1.484<br>(0.626)              | 1.497/1.537<br>(0.773)/(1.090) | 98.1                 | -1.062                      | 0.100                    | 0.542                |
| <b>5TS<sup>C-H</sup></b>   | 1.436<br>(0.336)                                  | 2.402<br>(0.510)                 | 1.342<br>(0.633)              | 1.495/1.633<br>(0.762)/(0.799) | 99.2                 | -0.862                      | 0.112                    | 0.374                |
| <b>6TS<sup>C-H</sup></b>   | 1.624<br>(0.239)                                  | 2.633<br>(0.460)                 | 1.302<br>(0.729)              | 1.481/1.485<br>(0.830)/(0.776) | 99.7                 | -0.948                      | 0.081                    | 0.448                |
| <b>7TS<sup>C-H</sup></b>   | 1.439<br>(0.325)                                  | 2.339<br>(0.538)                 | 1.319<br>(0.650)              | 1.560/1.494<br>(0.652)/(0.781) | 99.1                 | -0.834                      | 0.116                    | 0.439                |
| <b>9TS<sup>C-H</sup></b>   | 1.509<br>(0.288)                                  | 2.482<br>(0.496)                 | 1.318<br>(0.685)              | 1.574/1.449<br>(0.838)/(0.629) | 98.2                 | -0.894                      | 0.092                    | 0.438                |

**Table S7** Calculated (M06-D3/Def2-TZVP (Toluene)) important geometrical parameters, natural charges at the carbon atom of the  $\text{CH}_3^{\delta-}$  fragment, positively polarized hydrogen atom ( $\text{H}^{\delta+}$ ) and occupancies of the formally vacant  $p_\pi$  orbital centered at the central E (E = B and C) atom for the transition state involved in the activation of  $\text{CH}_4$  by **4-7**, **9** and **II** via inverted  $\pi_{\text{CH}_2}$  approach. The bond lengths and bond angles are given in Å and in degree ( $^\circ$ ) respectively. The Wiberg Bond Index values (WBI) are given within parenthesis (X = C and N).

| Molecules                  | $\text{H}^{\delta+}-\text{H}_3\text{C}^{\delta-}$ | $\text{E}-\text{CH}_3^{\delta-}$ | $\text{E}-\text{H}^{\delta+}$ | $\text{E}-\text{X}$            | $\angle\text{N-E-X}$ | $q_{\text{CH}_3^{\delta-}}$ | $q_{\text{H}^{\delta+}}$ | $\text{Occ}_{p_\pi}$ |
|----------------------------|---------------------------------------------------|----------------------------------|-------------------------------|--------------------------------|----------------------|-----------------------------|--------------------------|----------------------|
| <b>II-TS<sup>C-H</sup></b> | 1.238<br>(0.468)                                  | 1.833<br>(0.551)                 | 1.322<br>(0.401)              | 1.399/1.521<br>(1.066)/(0.983) | 105.8                | -0.649                      | 0.298                    | 0.740                |
| <b>4TS<sup>C-H</sup></b>   | 1.268<br>(0.474)                                  | 1.862<br>(0.584)                 | 1.357<br>(0.404)              | 1.573/1.589<br>(0.967)/(0.711) | 98.3                 | -0.783                      | 0.257                    | 0.606                |
| <b>5TS<sup>C-H</sup></b>   | 1.254<br>(0.582)                                  | 1.865<br>(0.582)                 | 1.369<br>(0.403)              | 1.549/1.642<br>(0.725)/(0.860) | 99.4                 | -0.781                      | 0.237                    | 0.637                |
| <b>6TS<sup>C-H</sup></b>   | 1.267<br>(0.483)                                  | 1.844<br>(0.601)                 | 1.385<br>(0.430)              | 1.545/1.528<br>(0.725)/(0.799) | 97.9                 | -0.779                      | 0.212                    | 0.579                |
| <b>7TS<sup>C-H</sup></b>   | 1.251<br>(0.501)                                  | 1.834<br>(0.604)                 | 1.384<br>(0.397)              | 1.534/1.573<br>(0.748)/(0.684) | 99.6                 | -0.796                      | 0.240                    | 0.488                |
| <b>9TS<sup>C-H</sup></b>   | 1.276<br>(0.474)                                  | 1.831<br>(0.623)                 | 1.382<br>(0.425)              | 1.512/1.594<br>(0.772)/(0.664) | 98.8                 | -0.799                      | 0.233                    | 0.635                |

**Table S8** Calculated (M06-D3/Def2-TZVP (Toluene)) important geometrical parameters, natural charges at the fluoride atom ( $F^{\delta-}$ ) and carbon atom of the  $C_6H_5$  fragment and occupancies of the formally vacant  $p_\pi$  orbital centered at the central E atom ( $E = B$  and Al) for the transition state involved in the activation of the C – F bond of  $C_6H_5F$  by **4-7**, **9** and **IIIa**. The bond lengths and bond angles are given in Å and in degree ( $^\circ$ ) respectively. The Wiberg Bond Index values (WBI) are given within parenthesis ( $X = C$  and N).

| Molecules                    | $F^{\delta-}-H_5C_6^{\delta+}$ | $E-C_6H_5^{\delta+}$ | $E-F^{\delta-}$  | E-X                            | $\angle N-E-X$ | $q_{C_6H_5^{\delta+}}$ | $q_{F^{\delta-}}$ | Occ $_{p_\pi}$ |
|------------------------------|--------------------------------|----------------------|------------------|--------------------------------|----------------|------------------------|-------------------|----------------|
| <b>IIIa-TS<sup>C-F</sup></b> | 1.529<br>(0.608)               | 2.340<br>(0.458)     | 2.058<br>(0.188) | 1.932/1.932<br>(0.261)/(0.261) | 92.9           | 0.159                  | -0.466            | 0.280          |
| <b>4TS<sup>C-F</sup></b>     | 1.370<br>(0.821)               | 2.487<br>(0.334)     | 2.692<br>(0.047) | 1.494/1.532<br>(0.729)/(1.046) | 98.1           | 0.408                  | -0.379            | 0.367          |
| <b>5TS<sup>C-F</sup></b>     | 1.370<br>(0.818)               | 2.428<br>(0.373)     | 2.780<br>(0.053) | 1.444/1.625<br>(0.705)/(0.644) | 99.4           | 0.397                  | -0.384            | 0.250          |
| <b>6TS<sup>C-F</sup></b>     | 1.374<br>(0.812)               | 2.403<br>(0.371)     | 2.653<br>(0.054) | 1.454/1.473<br>(0.867)/(0.763) | 98.9           | 0.399                  | -0.383            | 0.262          |
| <b>7TS<sup>C-F</sup></b>     | 1.403<br>(0.778)               | 2.172<br>(0.443)     | 2.406<br>(0.070) | 1.451/1.554<br>(0.831)/(0.608) | 98.4           | 0.316                  | -0.396            | 0.374          |
| <b>9TS<sup>C-F</sup></b>     | 1.375<br>(0.807)               | 2.393<br>(0.394)     | 2.723<br>(0.056) | 1.421/1.570<br>(0.830)/(0.542) | 97.1           | 0.392                  | -0.390            | 0.379          |

**Table S9** Calculated (M06-D3/Def2-TZVP (Toluene)) important geometrical parameters, natural charges at the hydrogen atom ( $H^{\delta+}$ ) and carbon atom of the  $C_6H_5$  fragment and occupancies of the formally vacant  $p_\pi$  orbital centered at the central E atom ( $E = B$ ) for the transition state involved in the activation of the *para* C–H bond of  $C_6H_5F$  by **4-7** and **9**. The bond lengths and bond angles are given in Å and in degree ( $^\circ$ ) respectively. The Wiberg Bond Index values (WBI) are given within parenthesis ( $X = C$  and N).

| Molecule                    | $H^{\delta+}-C_6H_4F^{\delta-}$ | $E-C_6H_4F^{\delta-}$ | $E-H^{\delta+}$  | E-X                            | $\angle N-E-X$ | $q_{C_6H_4F^{\delta-}}$ | $q_{H^{\delta+}}$ | Occ $_{p_\pi}$ |
|-----------------------------|---------------------------------|-----------------------|------------------|--------------------------------|----------------|-------------------------|-------------------|----------------|
| <b>4TS<sup>p(C-H)</sup></b> | 1.401<br>(0.424)                | 2.960<br>(0.164)      | 1.608<br>(0.517) | 1.484/1.525<br>(1.108)/(0.780) | 98.2           | -0.341                  | 0.148             | 0.470          |
| <b>5TS<sup>p(C-H)</sup></b> | 1.456<br>(0.343)                | 2.841<br>(0.300)      | 1.442<br>(0.612) | 1.624/1.455<br>(0.758)/(0.810) | 100.2          | -0.273                  | 0.091             | 0.583          |
| <b>6TS<sup>p(C-H)</sup></b> | 1.509<br>(0.334)                | 2.816<br>(0.232)      | 1.442<br>(0.612) | 1.459/1.470<br>(0.883)/(0.803) | 99.3           | -0.308                  | 0.120             | 0.431          |
| <b>7TS<sup>p(C-H)</sup></b> | 1.481<br>(0.309)                | 2.557<br>(0.400)      | 1.345<br>(0.655) | 1.467/1.554<br>(0.828)/(0.648) | 99.2           | -0.223                  | 0.100             | 0.385          |
| <b>9TS<sup>p(C-H)</sup></b> | 1.499<br>(0.317)                | 2.690<br>(0.329)      | 1.383<br>(0.643) | 1.568/1.429<br>(0.624)/(0.890) | 98.5           | -0.270                  | 0.095             | 0.425          |

**Table S10** Calculated (M06-D3/Def2-TZVP (Toluene)) important geometrical parameters, natural charges at the hydrogen atom ( $H^{\delta+}$ ) and carbon atom of the  $C_6H_5$  fragment and occupancies of the formally vacant  $p_\pi$  orbital centered at the central E atom ( $E = B$ ) for the transition state involved in the activation of the *meta* C–H bond of  $C_6H_5F$  by **4-7** and **9**. The bond lengths and bond angles are given in Å and in degree ( $^\circ$ ) respectively. The Wiberg Bond Index values (WBI) are given within parenthesis ( $X = C$  and  $N$ ).

| Molecule                    | $H^{\delta+}-C_6H_4F^{\delta-}$ | $E-C_6H_4F^{\delta-}$ | $E-H^{\delta+}$  | E-X                            | $\angle N-E-X$ | $q_{C_6H_4F^{\delta-}}$ | $q_{H^{\delta+}}$ | Occ $p_\pi$ |
|-----------------------------|---------------------------------|-----------------------|------------------|--------------------------------|----------------|-------------------------|-------------------|-------------|
| <b>4TS<sup>m(C-H)</sup></b> | 1.386<br>(0.436)                | 2.947<br>(0.172)      | 1.612<br>(0.504) | 1.525/1.485<br>(1.110)/(0.781) | 98.3           | -0.298                  | 0.148             | 0.435       |
| <b>5TS<sup>m(C-H)</sup></b> | 1.450<br>(0.352)                | 2.840<br>(0.290)      | 1.453<br>(0.603) | 1.454/1.624<br>(0.815)/(0.758) | 100.2          | -0.231                  | 0.095             | 0.524       |
| <b>6TS<sup>m(C-H)</sup></b> | 1.487<br>(0.351)                | 2.810<br>(0.228)      | 1.456<br>(0.596) | 1.469/1.458<br>(0.803)/(0.884) | 99.4           | -0.268                  | 0.123             | 0.650       |
| <b>7TS<sup>m(C-H)</sup></b> | 1.483<br>(0.318)                | 2.601<br>(0.376)      | 1.364<br>(0.646) | 1.463/1.553<br>(0.839)/(0.649) | 99.1           | -0.195                  | 0.101             | 0.392       |
| <b>9TS<sup>m(C-H)</sup></b> | 1.488<br>(0.330)                | 2.717<br>(0.310)      | 1.400<br>(0.629) | 1.566/1.427<br>(0.623)/(0.896) | 98.5           | -0.236                  | 0.097             | 0.453       |

**Table S11** Calculated (M06-D3/Def2-TZVP (Toluene)) important geometrical parameters, natural charges at the hydrogen atom ( $H^{\delta+}$ ) and carbon atom of the  $C_6H_5$  fragment and occupancies of the formally vacant  $p_\pi$  orbital centered at the central E atom ( $E = B$ ) for the transition state involved in the activation of the *ortho* C–H bond of  $C_6H_5F$  by **4-7** and **9**. The bond lengths and bond angles are given in Å and in degree ( $^\circ$ ) respectively. The Wiberg Bond Index values (WBI) are given within parenthesis ( $X = C$  and  $N$ ).

| Molecule                    | $H^{\delta+}-C_6H_4F^{\delta-}$ | $E-C_6H_4F^{\delta-}$ | $E-H^{\delta+}$  | E-X                            | $\angle N-E-X$ | $q_{C_6H_4F^{\delta-}}$ | $q_{H^{\delta+}}$ | Occ $p_\pi$ |
|-----------------------------|---------------------------------|-----------------------|------------------|--------------------------------|----------------|-------------------------|-------------------|-------------|
| <b>4TS<sup>o(C-H)</sup></b> | 1.355<br>(0.460)                | 2.967<br>(0.149)      | 1.668<br>(0.473) | 1.526/1.485<br>(1.101)/(0.775) | 98.1           | -0.386                  | 0.168             | 0.377       |
| <b>5TS<sup>o(C-H)</sup></b> | 1.405<br>(0.405)                | 2.946<br>(0.161)      | 1.608<br>(0.537) | 1.447/1.627<br>(0.814)/(0.730) | 99.9           | -0.391                  | 0.138             | 0.262       |
| <b>6TS<sup>o(C-H)</sup></b> | 1.473<br>(0.362)                | 2.770<br>(0.241)      | 1.467<br>(0.582) | 1.465/1.471<br>(0.864)/(0.796) | 99.0           | -0.340                  | 0.130             | 0.432       |
| <b>7TS<sup>o(C-H)</sup></b> | 1.453<br>(0.356)                | 2.669<br>(0.310)      | 1.423<br>(0.601) | 1.457/1.550<br>(0.855)/(0.646) | 98.9           | -0.320                  | 0.119             | 0.395       |
| <b>9TS<sup>o(C-H)</sup></b> | 1.451<br>(0.367)                | 2.765<br>(0.256)      | 1.462<br>(0.586) | 1.565/1.423<br>(0.619)/(0.904) | 98.2           | -0.347                  | 0.118             | 0.456       |

**Table S12** Calculated (M06-D3/Def2-TZVP(toluen)) activation energy barriers and reaction free energies (in kcal mol<sup>-1</sup>) for the activation of the C–H (*para*, *meta* and *ortho*) bond of C<sub>6</sub>H<sub>5</sub>F by **4-7** and **9**.

| Molecules | <i>para</i>                        |                            | <i>meta</i>                        |                            | <i>ortho</i>                       |                            |
|-----------|------------------------------------|----------------------------|------------------------------------|----------------------------|------------------------------------|----------------------------|
|           | $\Delta G^{\circ}_{TS}^{\ddagger}$ | $\Delta G^{\circ}_{Total}$ | $\Delta G^{\circ}_{TS}^{\ddagger}$ | $\Delta G^{\circ}_{Total}$ | $\Delta G^{\circ}_{TS}^{\ddagger}$ | $\Delta G^{\circ}_{Total}$ |
| <b>4</b>  | 18.3                               | -48.0                      | 16.6                               | -48.4                      | 14.7                               | -48.8                      |
| <b>5</b>  | 22.7                               | -57.7                      | 20.0                               | -58.6                      | 17.4                               | -58.0                      |
| <b>6</b>  | 25.0                               | -50.8                      | 22.8                               | -51.3                      | 20.8                               | -49.5                      |
| <b>7</b>  | 25.1                               | -60.1                      | 23.8                               | -60.7                      | 21.6                               | -61.0                      |
| <b>9</b>  | 24.8                               | -54.2                      | 23.5                               | -55.8                      | 20.6                               | -54.8                      |

**Table S13** Calculated activation energy barriers and reaction free energies (in kcal mol<sup>-1</sup>) for the formation of the E–H (E = H, N and C) splitting products obtained for **4-9** with different functionals.

| Molecules                 | M06                                |                            | PBE0                               |                            | $\omega$ B97XD                     |                            |
|---------------------------|------------------------------------|----------------------------|------------------------------------|----------------------------|------------------------------------|----------------------------|
|                           | $\Delta G^{\circ}_{TS}^{\ddagger}$ | $\Delta G^{\circ}_{Total}$ | $\Delta G^{\circ}_{TS}^{\ddagger}$ | $\Delta G^{\circ}_{Total}$ | $\Delta G^{\circ}_{TS}^{\ddagger}$ | $\Delta G^{\circ}_{Total}$ |
| <b>4 + H<sub>2</sub></b>  | 14.4                               | -48.8                      | 11.6                               | -47.0                      | 14.7                               | -46.9                      |
| <b>7 + H<sub>2</sub></b>  | 18.1                               | -61.4                      | 14.5                               | -62.8                      | 18.8                               | -60.7                      |
| <b>5 + NH<sub>3</sub></b> | 16.4                               | -63.4                      | 14.0                               | -63.6                      | 15.9                               | -62.7                      |
| <b>7 + NH<sub>3</sub></b> | 19.4                               | -67.4                      | 17.1                               | -68.1                      | 20.2                               | -65.8                      |
| <b>6 + CH<sub>4</sub></b> | 31.7                               | -45.0                      | 31.8                               | -44.6                      | 35.6                               | -44.0                      |
| <b>9 + CH<sub>4</sub></b> | 29.9                               | -49.2                      | 29.4                               | -49.2                      | 33.3                               | -48.4                      |

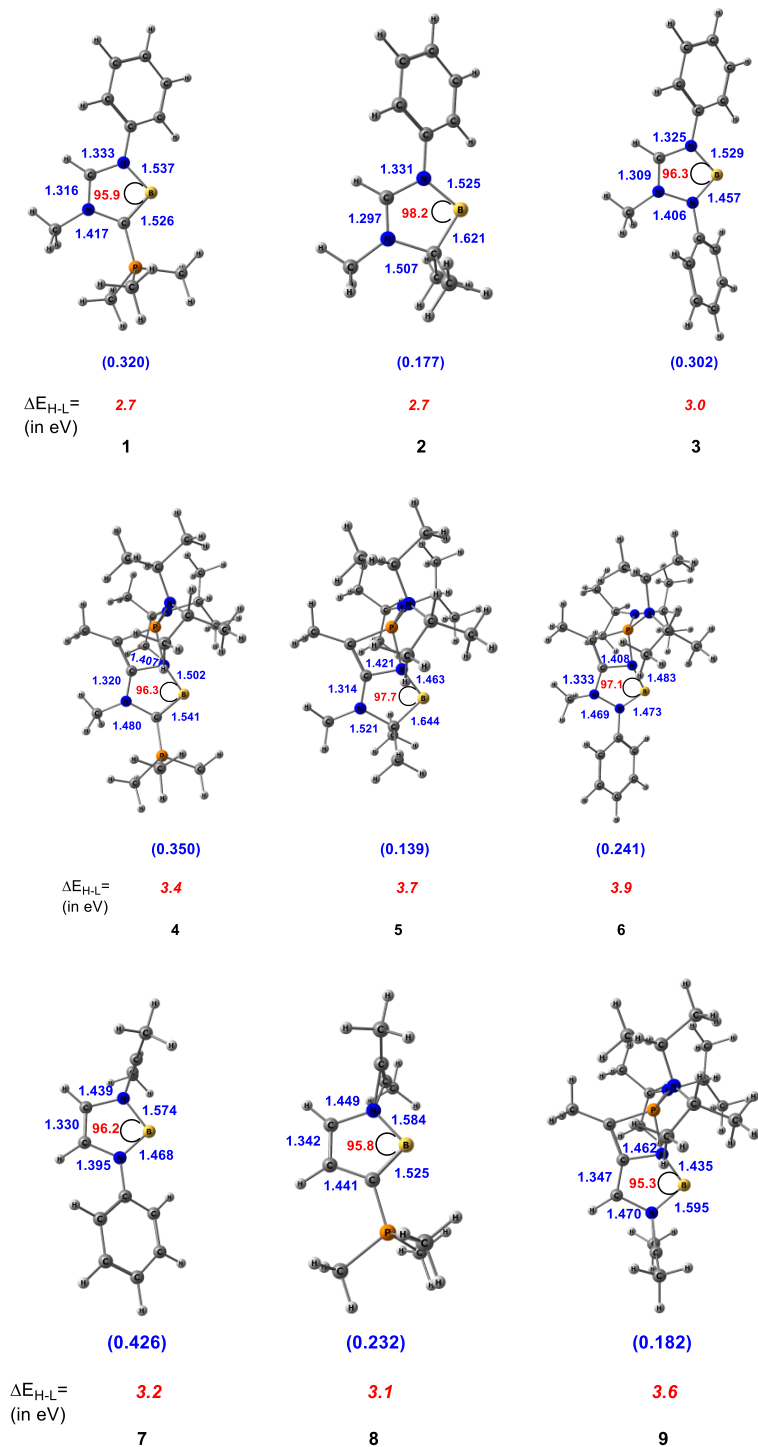

**Fig. S1** Pictorial representation of the singlet state optimized geometries of **1-9** calculated at M06-D3/Def2-TZVP (Toluene) level of theory. The occupancy of the formally vacant  $p_{\pi}$  orbital centered at the boron atom for **1-9** are given within parenthesis. Bond lengths and bond angles are given in Å and degree ( $^{\circ}$ ) respectively. The HOMO-LUMO ( $\Delta E_{H-L}$ , in eV) gap values for **1-9** are given in *italics*.

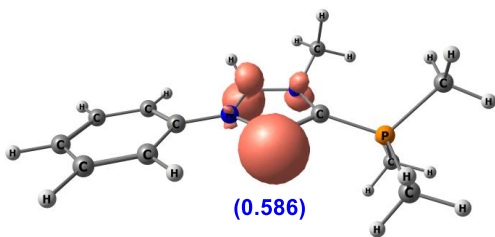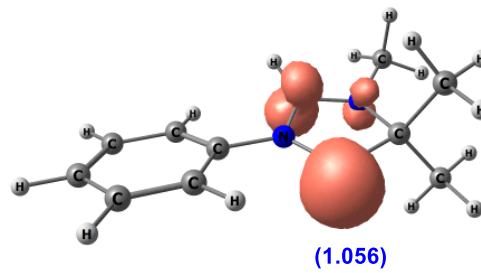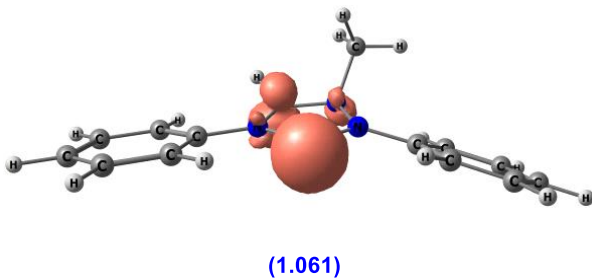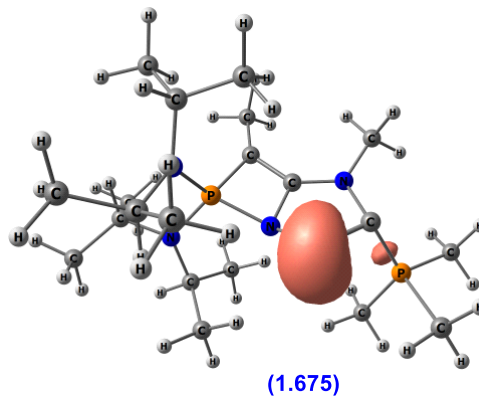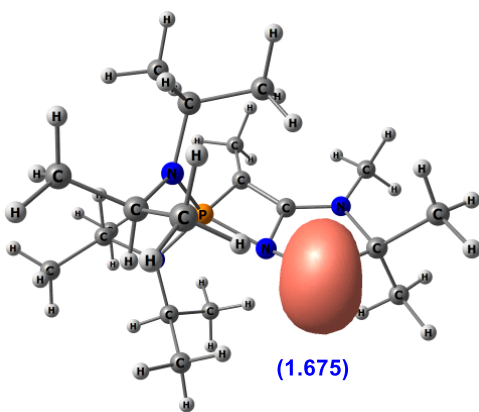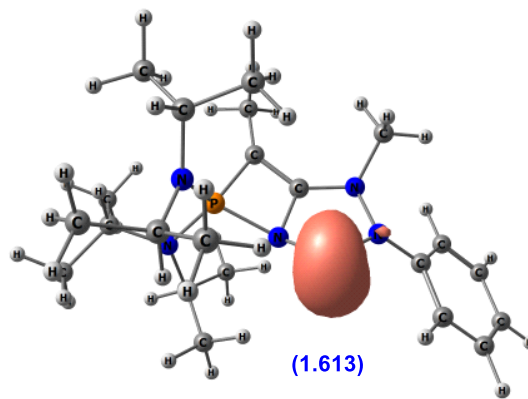



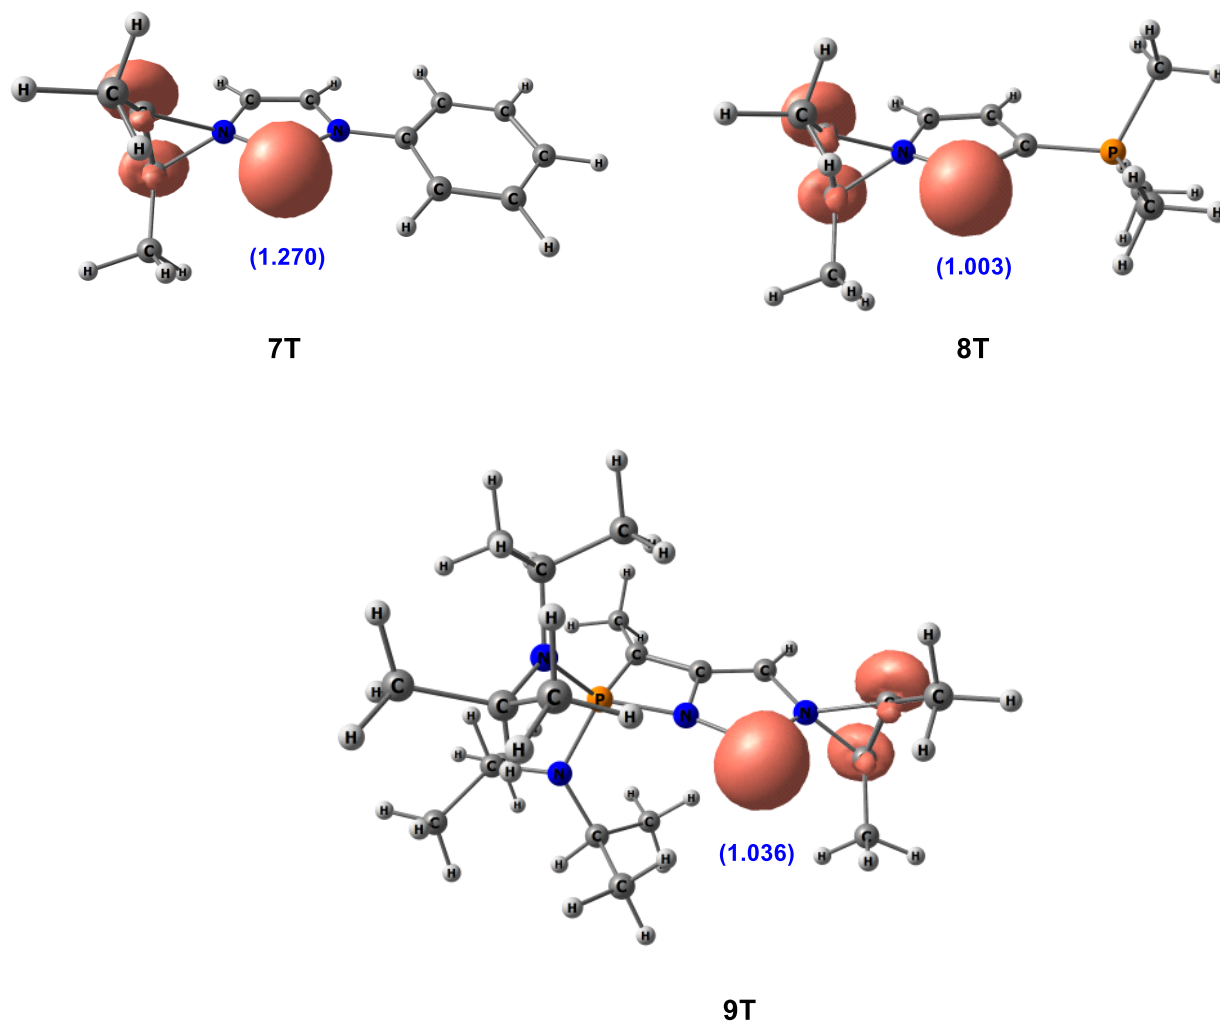

**Fig. S2** Mulliken spin density plots for the triplet states of **1-9** calculated at M06-D3/Def2-TZVP (Toluene) level of theory. The spin density values at the central boron atom are given within parenthesis.

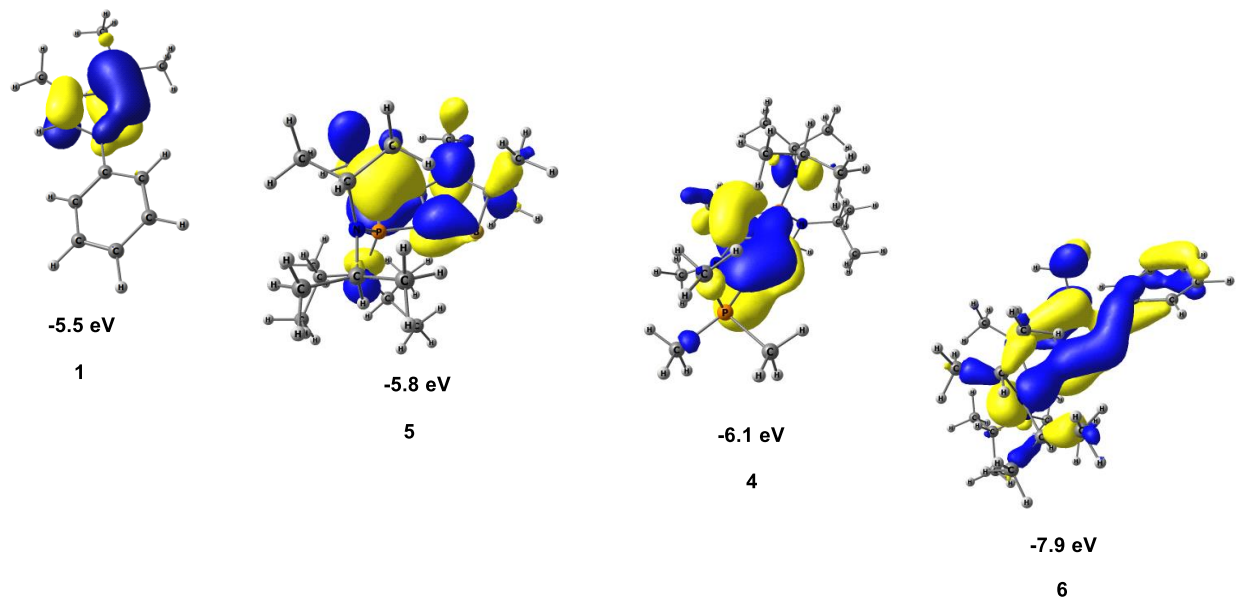

**Fig. S3** Pictorial representation of the occupied  $\pi$ -symmetric molecular orbitals (along with their energies in eV) for **1**, **4-6** calculated at the M06-D3/Def2-TZVP (Toluene) level of theory.

$\sigma$ -symmetric donor orbital

$\pi$ -symmetric acceptor orbital

1

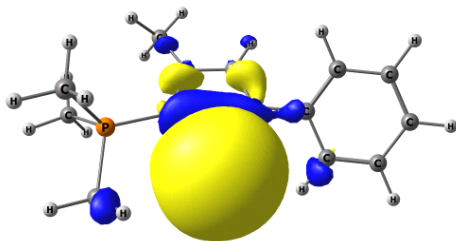

-3.2 eV

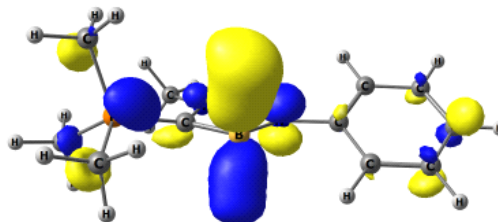

1.4 eV

2

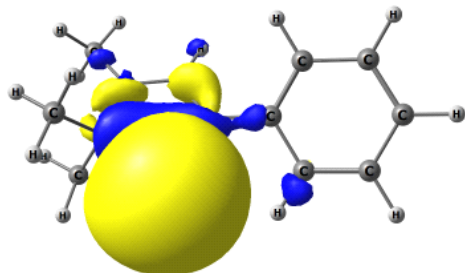

-3.9 eV

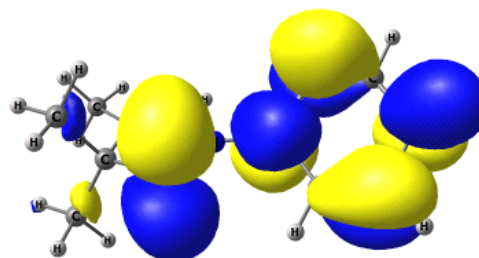

-0.3 eV

3

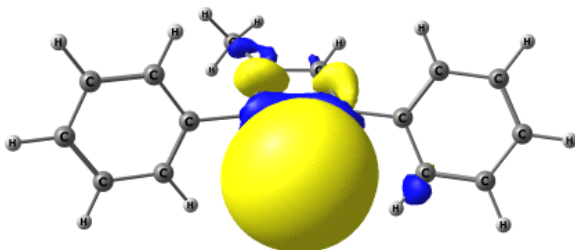

-4.1 eV

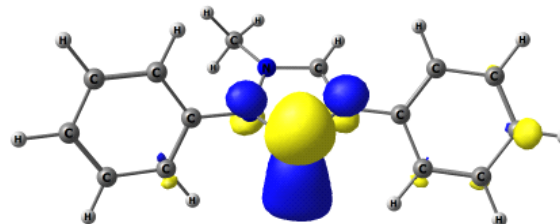

1.1 eV

4

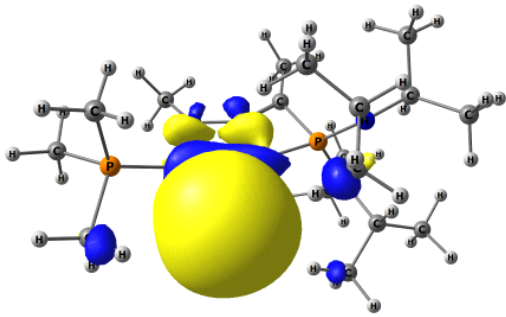

-3.0 eV

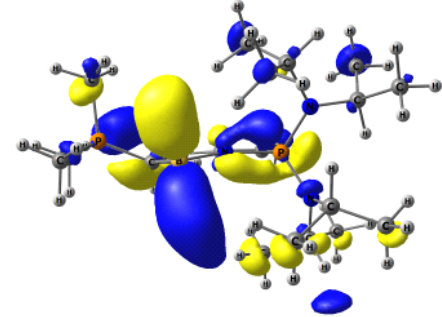

1.0 eV

5

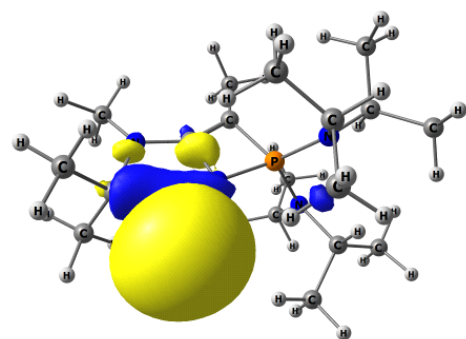

-3.4 eV

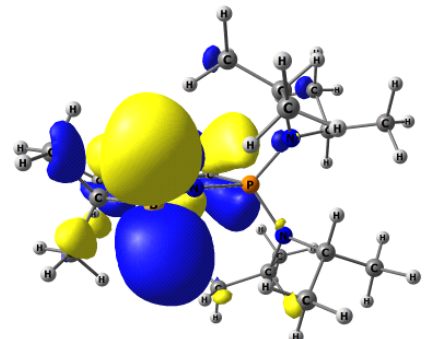

0.4 eV

6

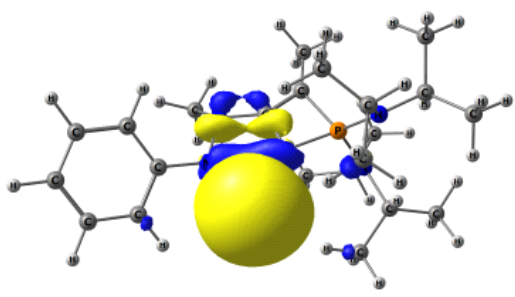

-3.8 eV

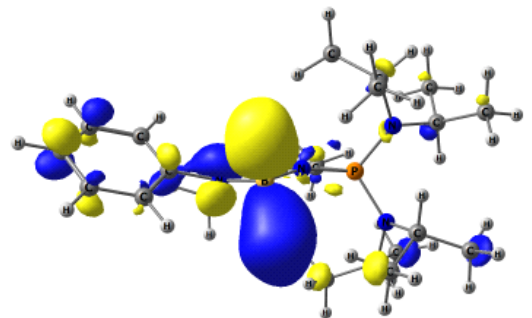

1.1 eV

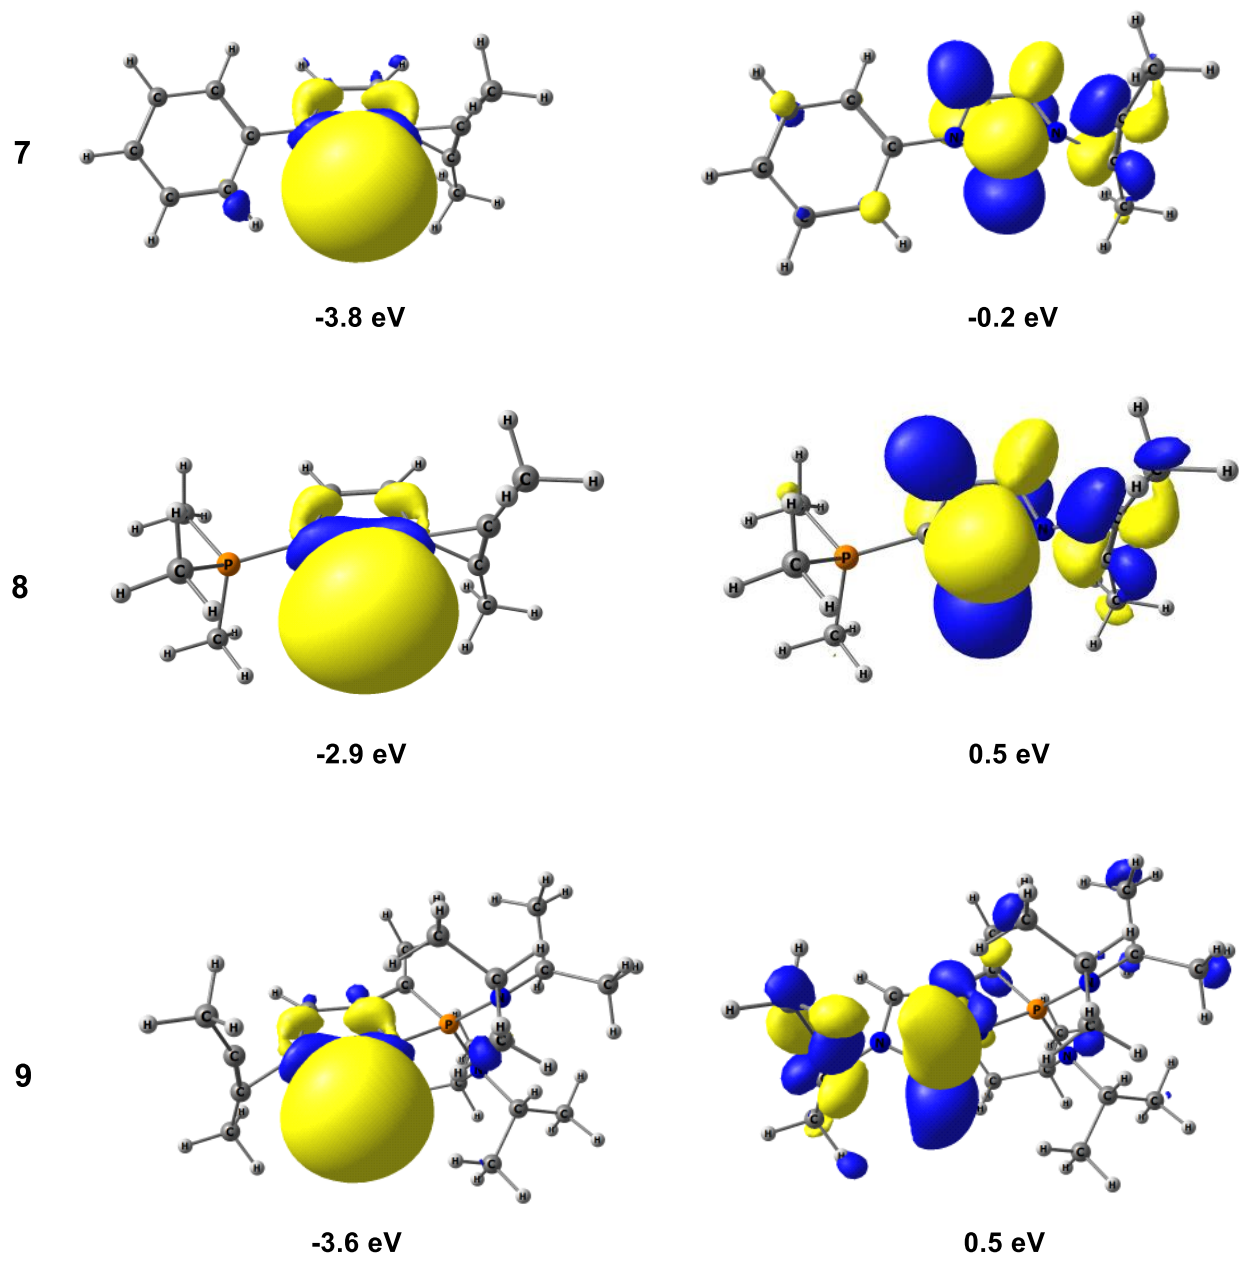

**Fig. S4** Pictorial representation of the  $\sigma$ -symmetric donor and  $\pi$ -symmetric acceptor orbitals (along with their energies in eV) concentrated at the boron atom for **1-9**. (M06-D3/Def2-TZVP (Toluene))

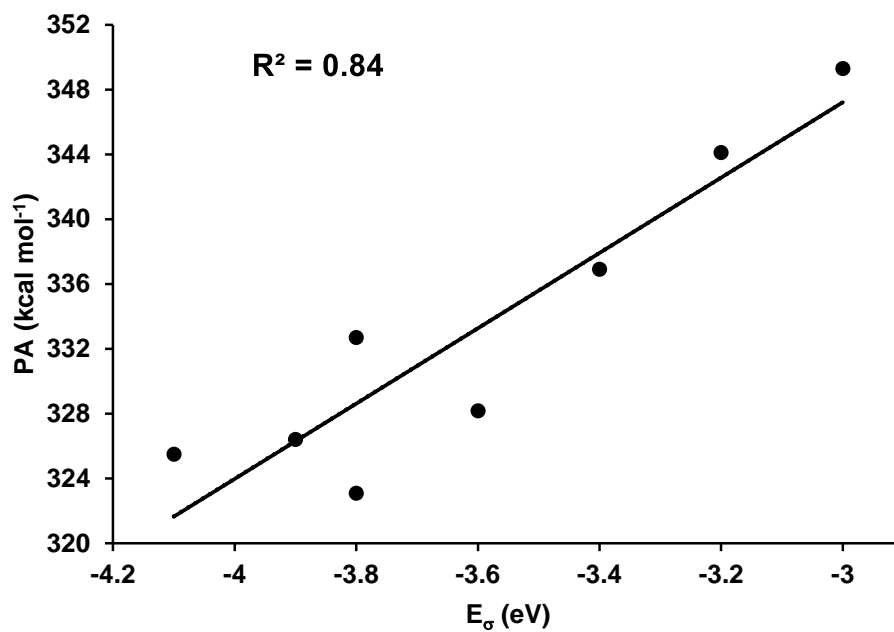

**Fig. S5** Correlation plot between proton affinity (PA, in  $\text{kcal mol}^{-1}$ ) and  $E_\sigma$  (in eV) values for **1-9** (omitting the point corresponding to **8**).

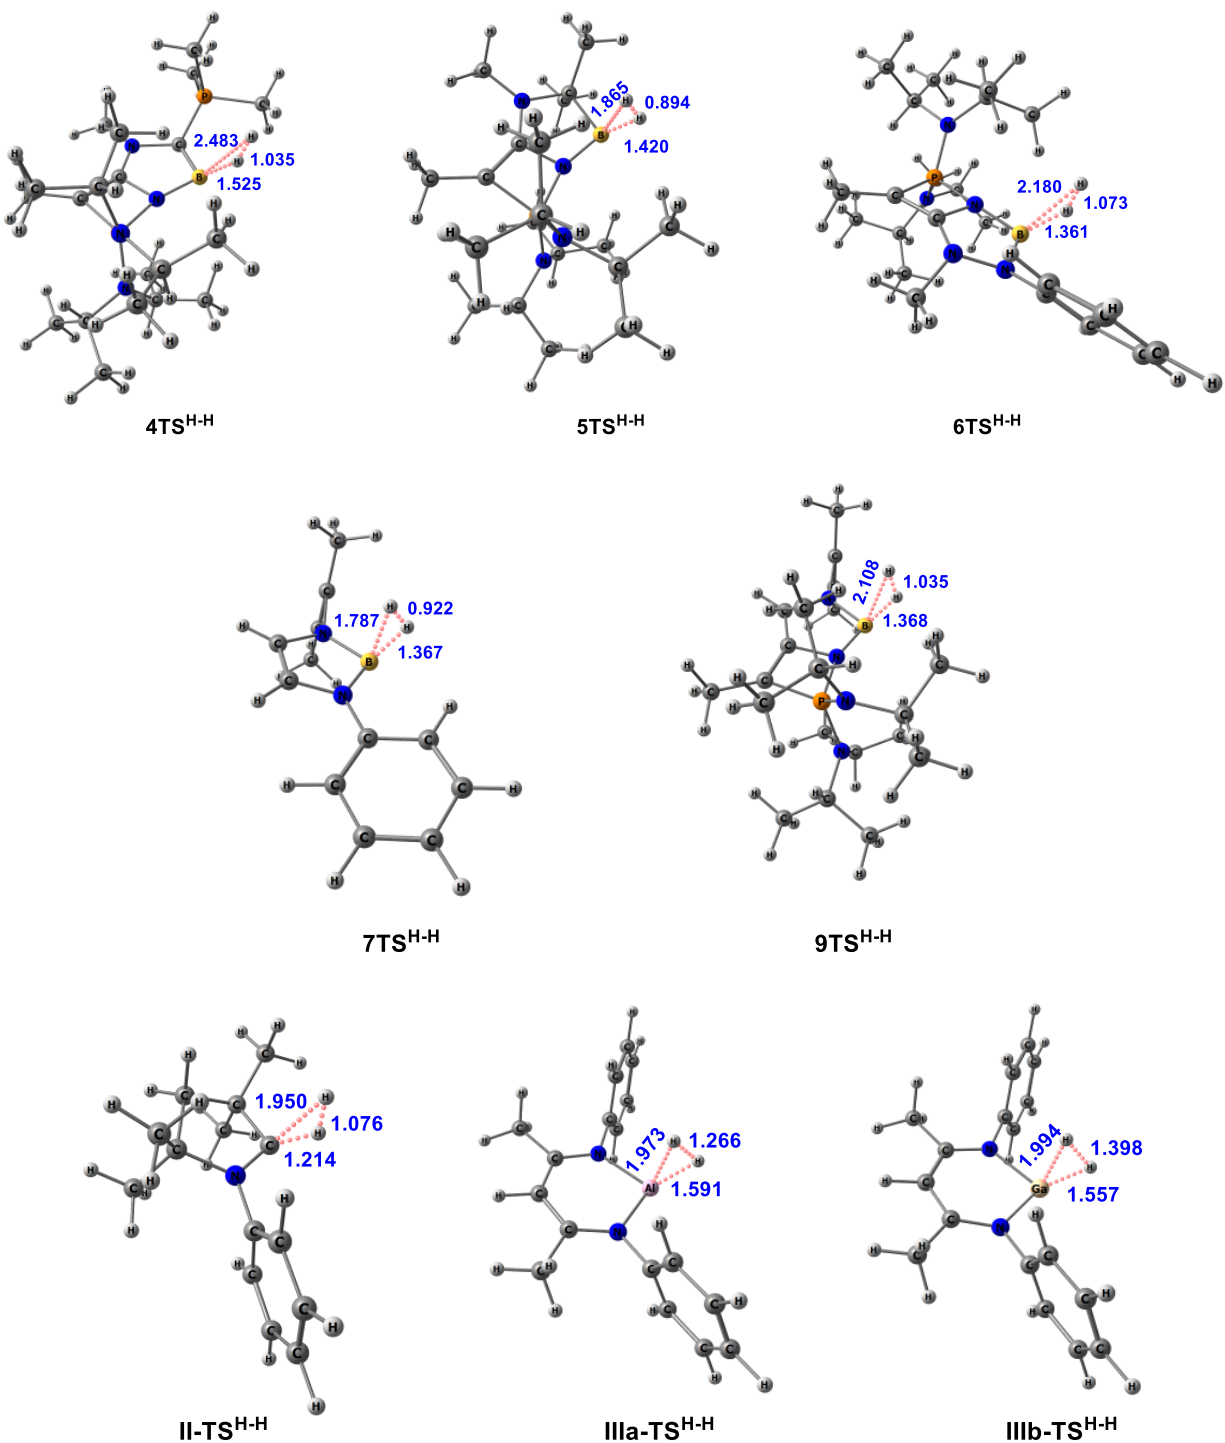

**Fig. S6** Optimized geometries of the transition states (TS) involved in the activation of dihydrogen by **4-7**, **9**, **II**, **IIIa** and **IIIb** (bond lengths are given in Å) at M06-D3/Def2-TZVP (Toluene) level of theory.

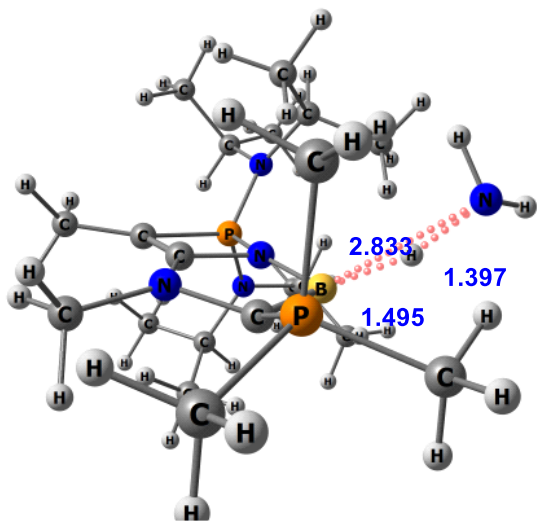

4TS<sup>N-H</sup>

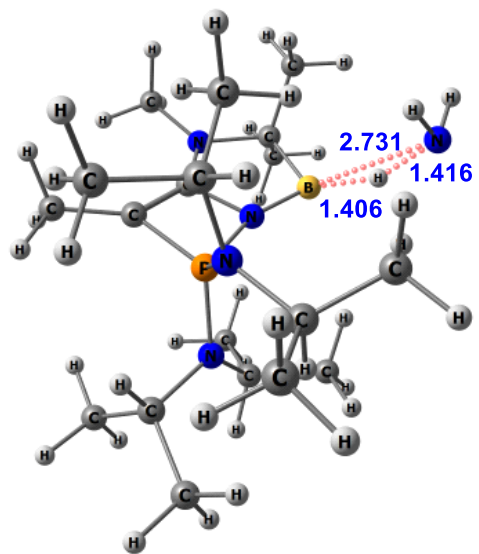

5TS<sup>N-H</sup>

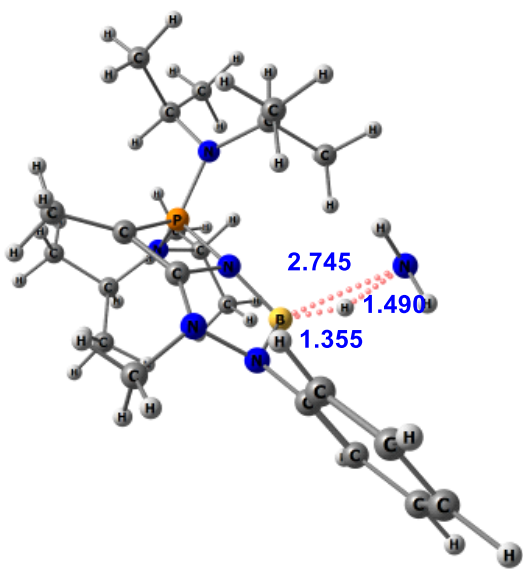

6TS<sup>N-H</sup>

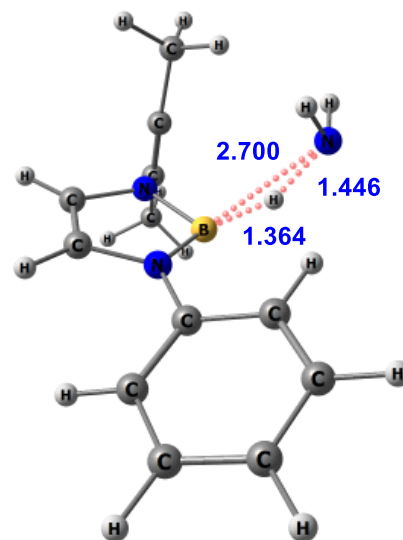

7TS<sup>N-H</sup>



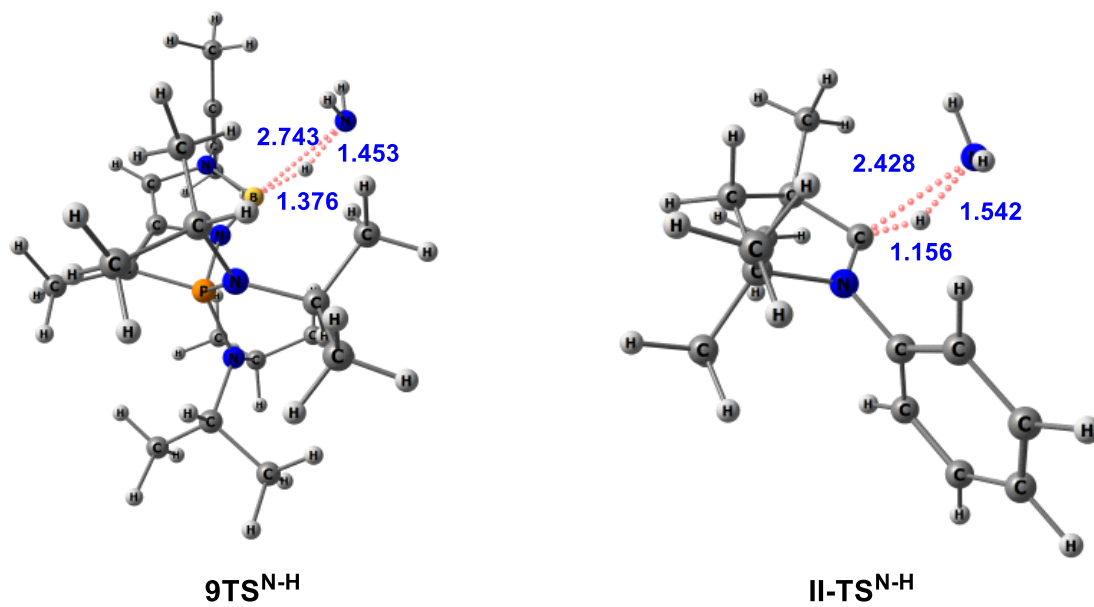

**Fig. S7** Optimized geometries of the TSs involved in the activation of  $\text{NH}_3$  by **4-7**, **9** and **II** (bond lengths are given in Å) at M06-D3/Def2-TZVP (Toluene) level of theory.

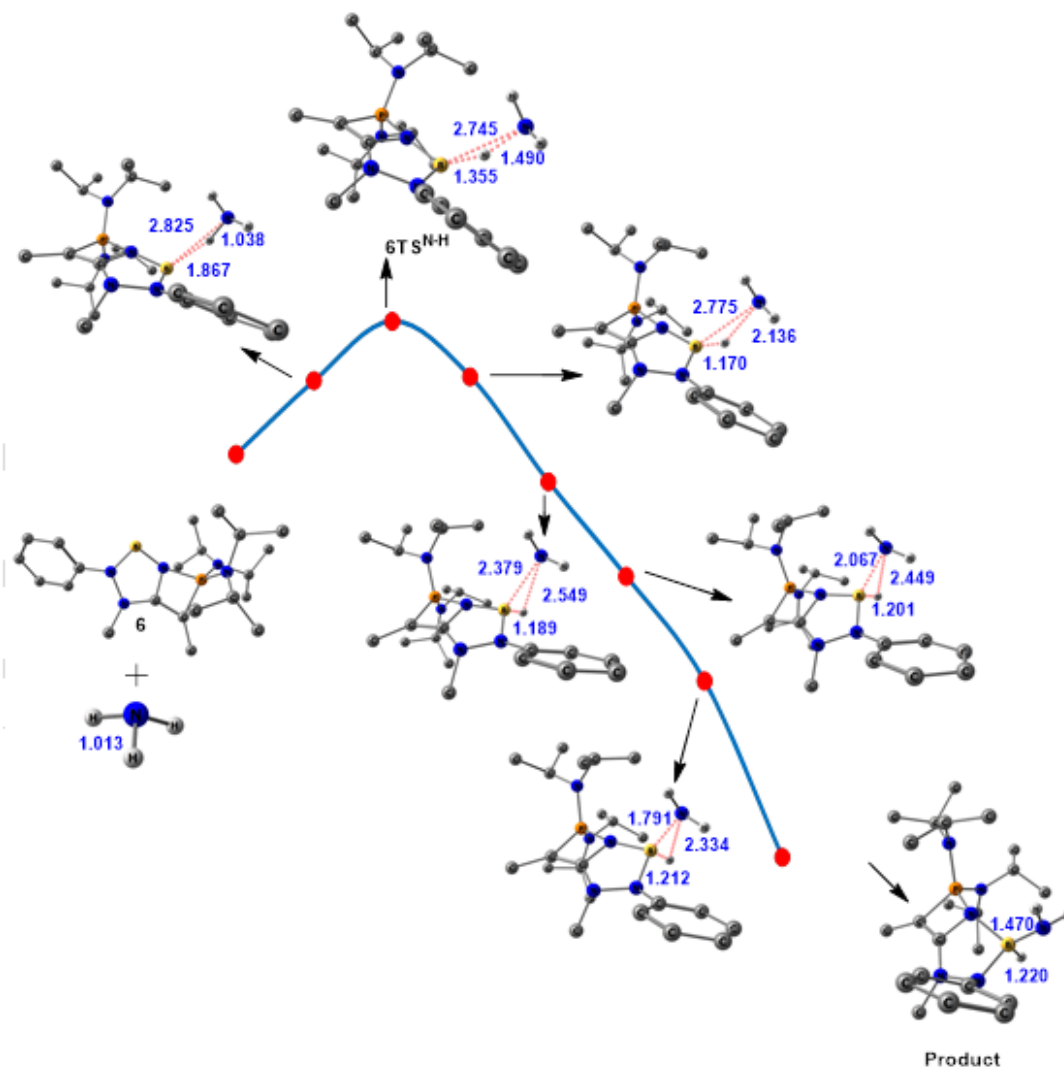

**Fig. S8** Some structures along the reaction pathway obtained from the IRC calculation (M06-D3/Def2-TZVP (Toluene)) for the activation of N–H bond of ammonia by **6** (bond lengths are given in Å). The hydrogen atoms of the methyl groups are omitted for clarity.

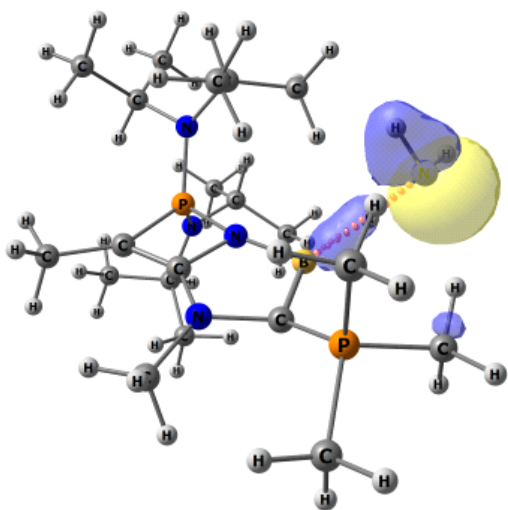

4TS<sup>N-H</sup>

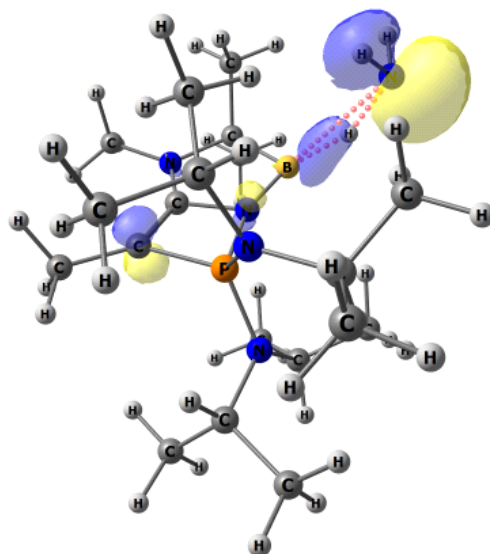

5TS<sup>N-H</sup>

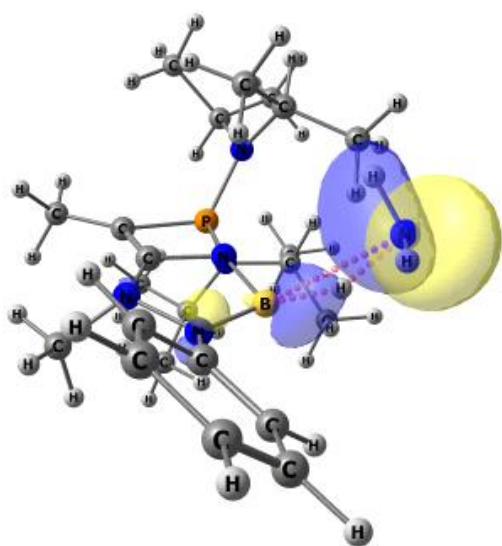

6TS<sup>N-H</sup>

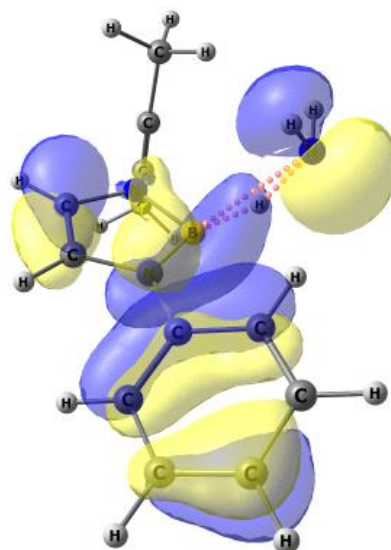

7TS<sup>N-H</sup>

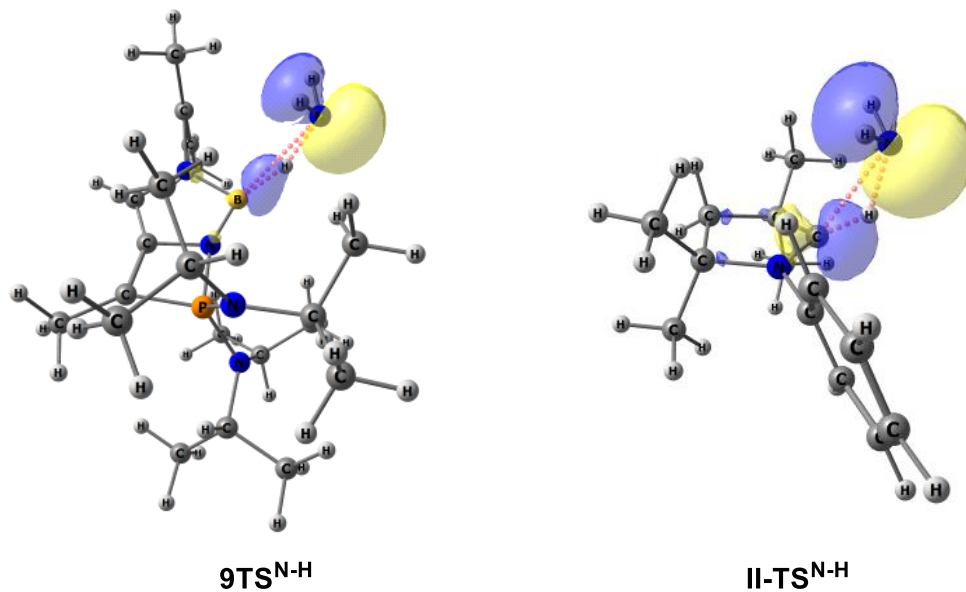

**Fig. S9** Pictorial representation of the molecular orbital showing the orientation of the amino lone pair for the transition states (TS) involved in the activation of NH<sub>3</sub> by **4-7**, **9** and **II** at M06-D3/Def2-TZVP (Toluene) level of theory.

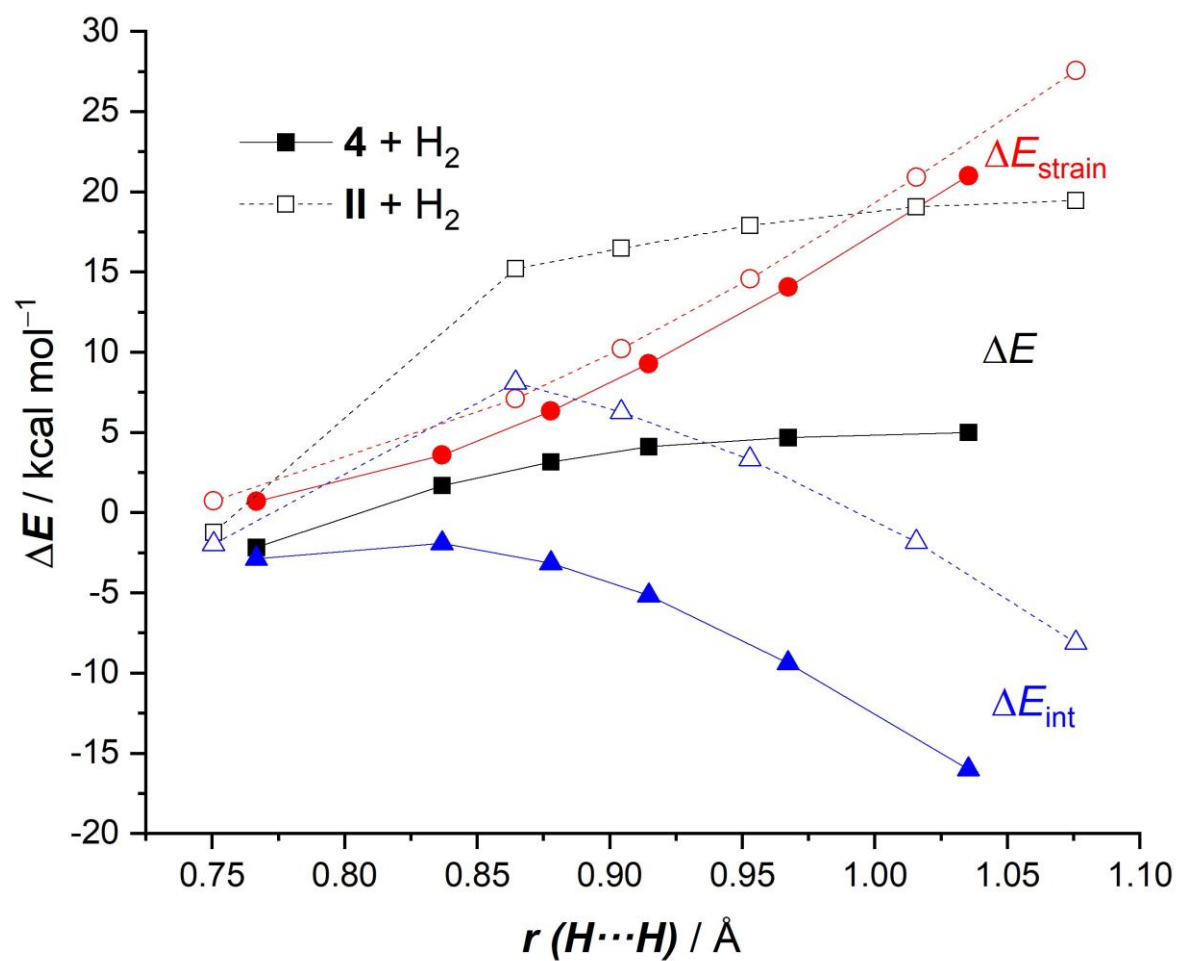

**Fig. S10** Comparative activation strain diagrams for the  $\text{H}_2$ -activation reactions mediated by **4** (solid lines) and **II** (dotted lines) along the reaction coordinate projected onto the breaking  $\text{H}\cdots\text{H}$  bond distance. All data have been computed at the PCM(toluene)-M06-D3/def2-TZVP level.

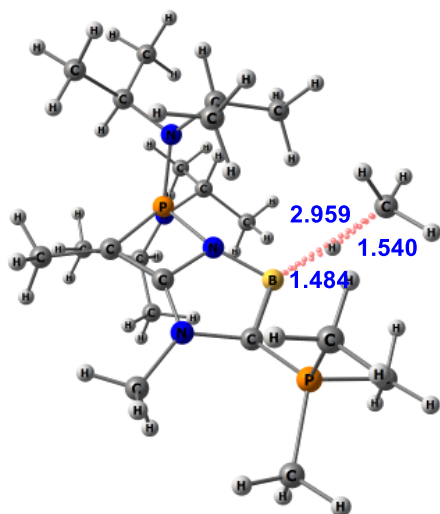

4TS<sub>σ</sub><sup>C-H</sup>

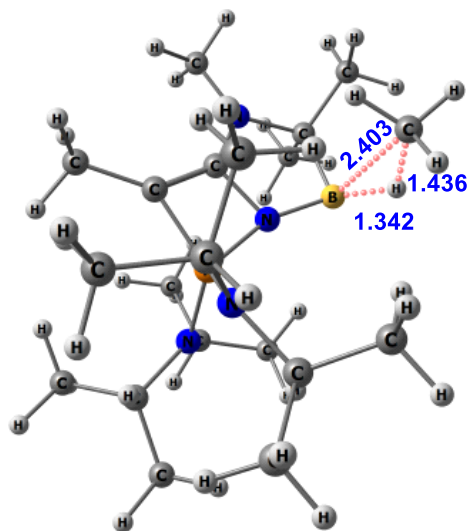

5TS<sub>σ</sub><sup>C-H</sup>

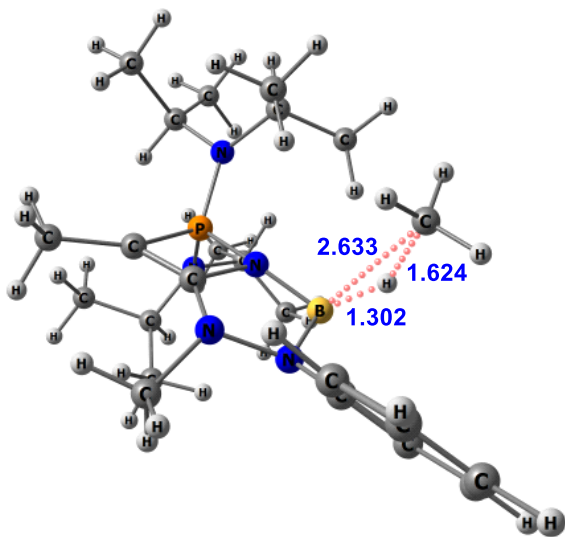

6TS<sub>σ</sub><sup>C-H</sup>

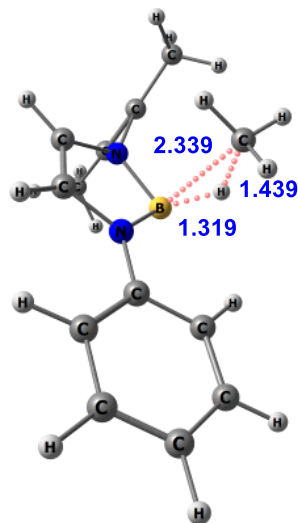

7TS<sub>σ</sub><sup>C-H</sup>

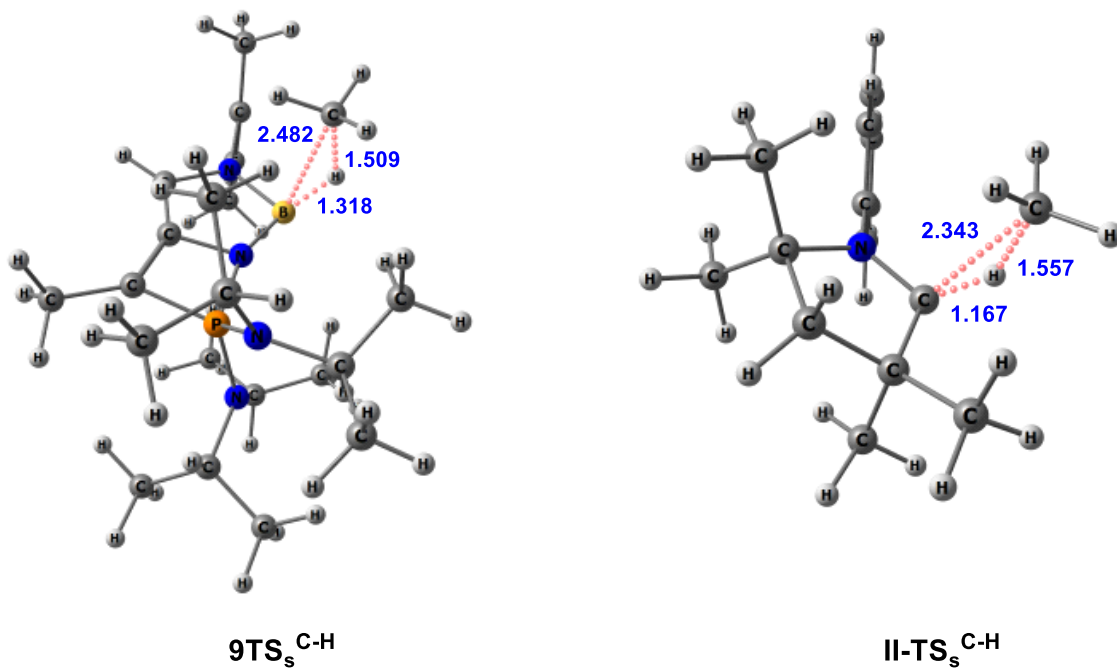

**Fig. S11** Optimized geometries of the transition states (TS) involved in the activation of C-H bond of CH<sub>4</sub> by **4-7**, **9** and **II** (bond lengths are given in Å) via  $\sigma_{\text{CH}_2}$  approach at M06-D3/Def2-TZVP (Toluene) level of theory.

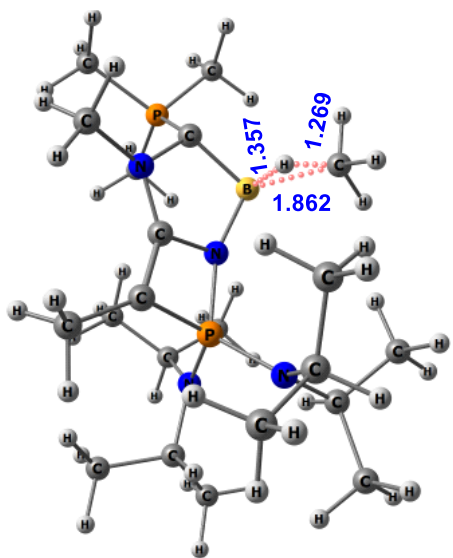

4TS $\pi^{C-H}$  (inverted)

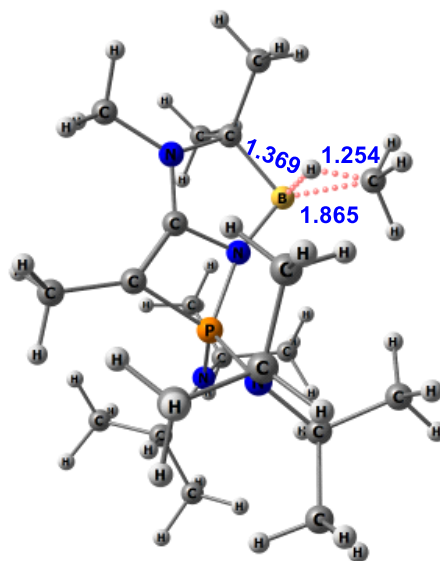

5TS $\pi^{C-H}$  (inverted)

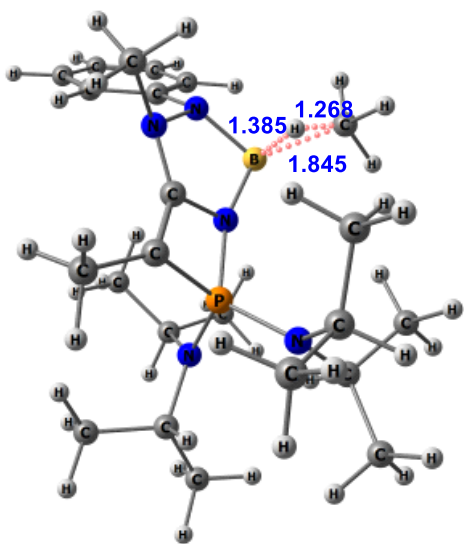

6TS $\pi^{C-H}$  (inverted)

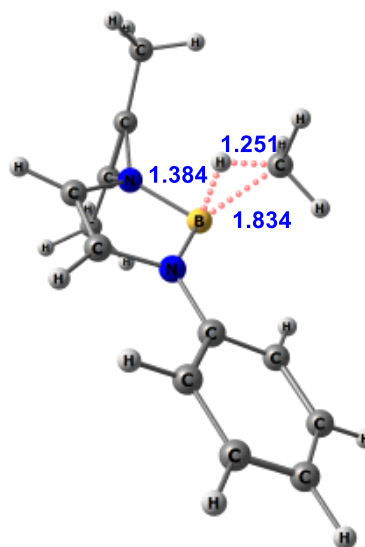

7TS $\pi^{C-H}$  (inverted)



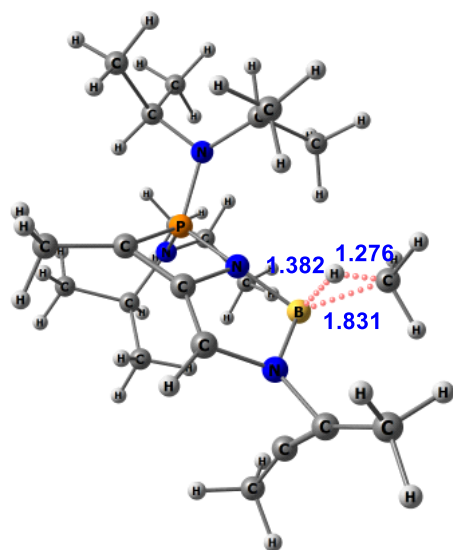

**9TSp<sup>C-H</sup> (inverted)**

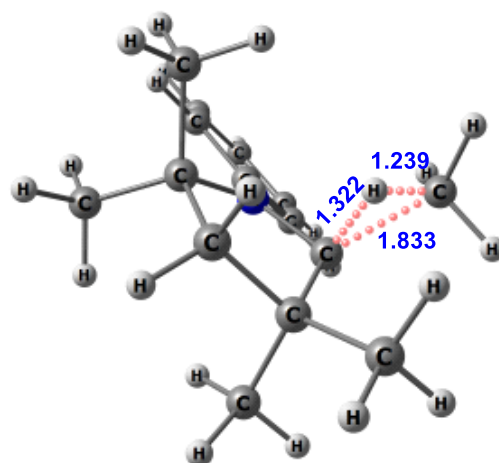

**II-TSp<sup>C-H</sup> (inverted)**

**Fig. S12** Optimized geometries of the transition states (TS) involved in the activation of C–H bond of CH<sub>4</sub> by **4-7**, **9** and **II** (bond lengths are given in Å) via inverted  $\pi_{\text{CH}_2}$  approach at M06-D3/Def2-TZVP (Toluene) level of theory.

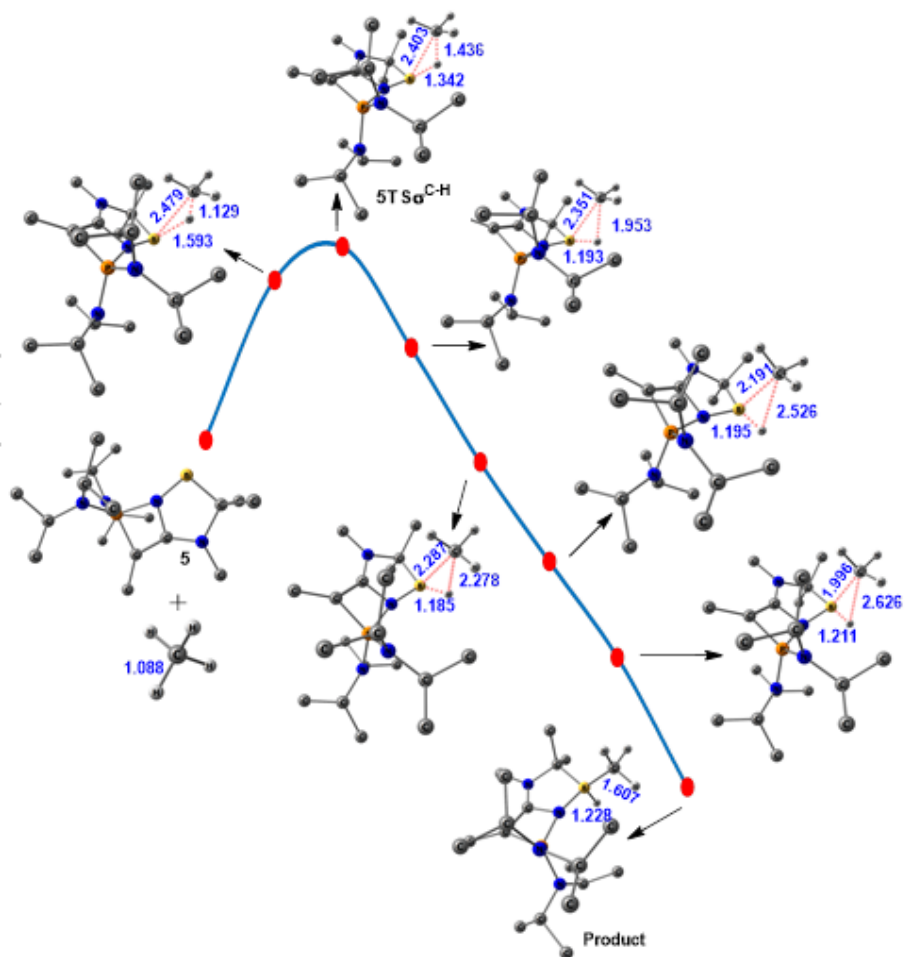

**Fig. S13** Some structures along the reaction pathway obtained from the IRC calculation (M06-D3/Def2-TZVP (Toluene)) for the activation of methane by **5** (bond lengths are given in Å) via  $\sigma_{\text{CH}_2}$  approach. The hydrogen atoms of the methyl groups are omitted for clarity.

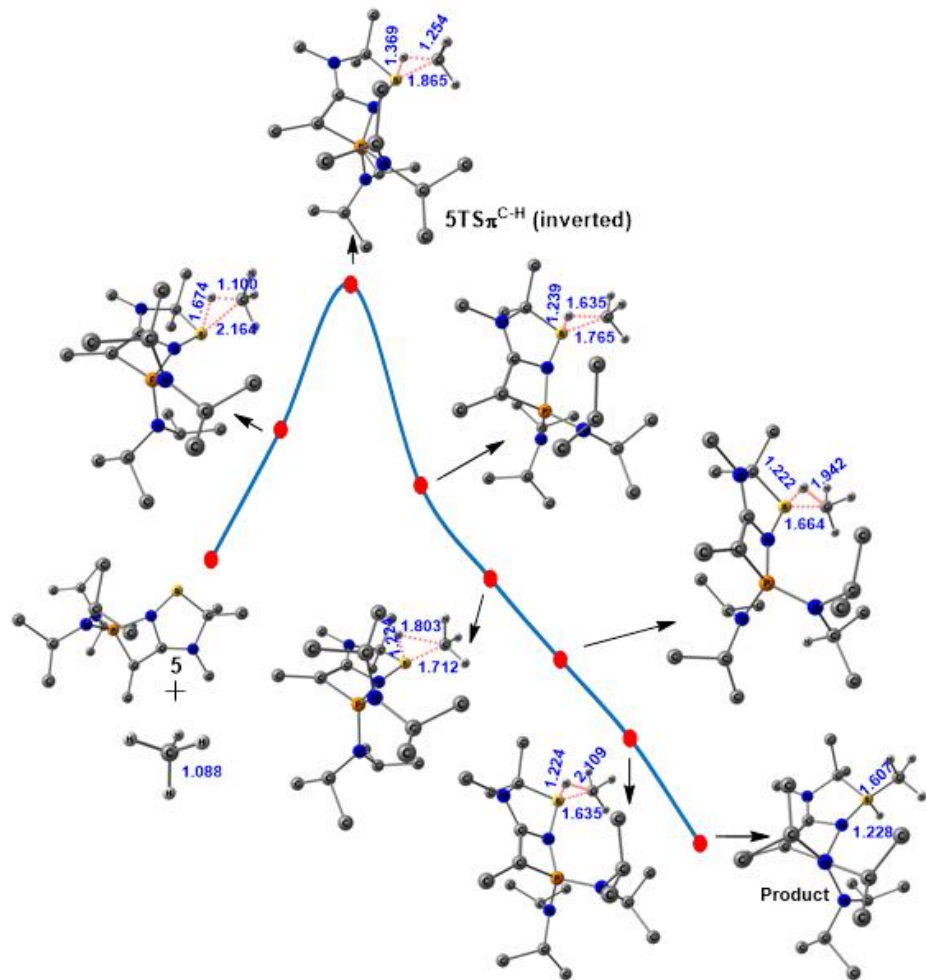

**Fig. S14** Some structures along the reaction pathway obtained from the IRC calculation (M06-D3/Def2-TZVP (Toluene)) for the activation of methane by **5** (bond lengths are given in Å) via inverted  $\pi_{\text{CH}_2}$  approach. The hydrogen atoms of the methyl groups are omitted for clarity.

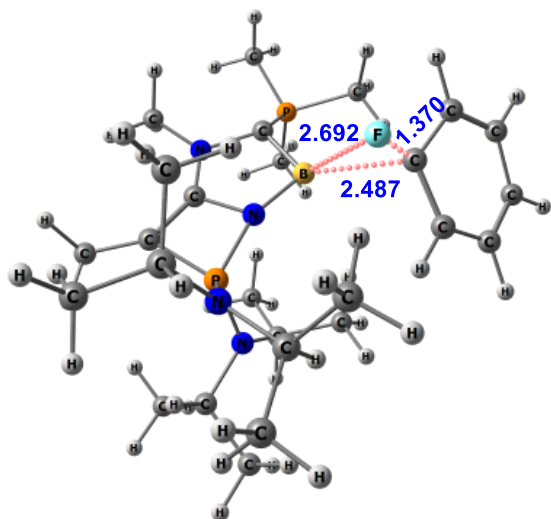

4TS<sup>C-F</sup>

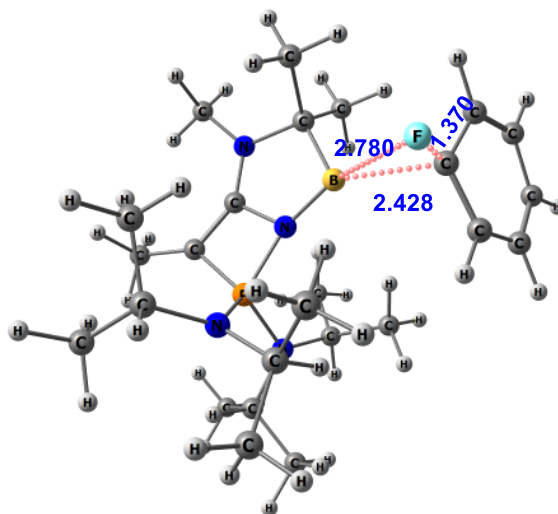

5TS<sup>C-F</sup>

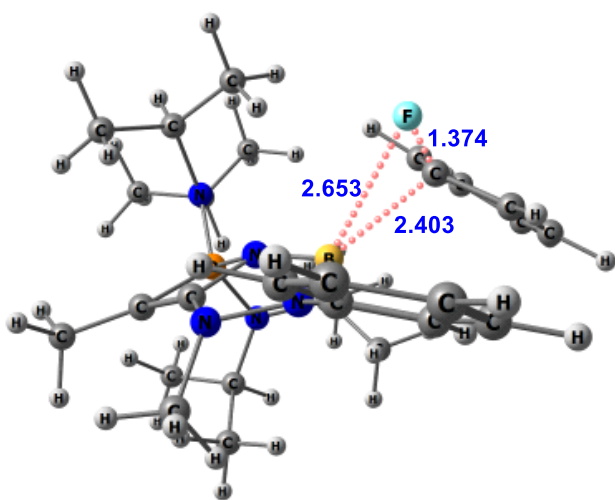

6TS<sup>C-F</sup>

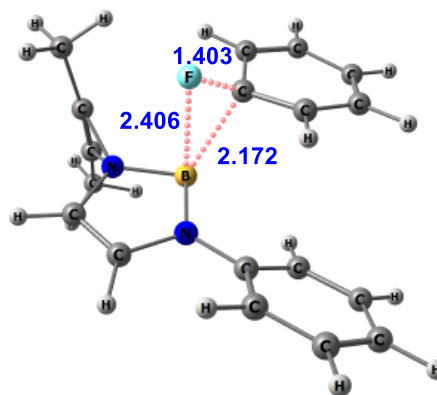

7TS<sup>C-F</sup>

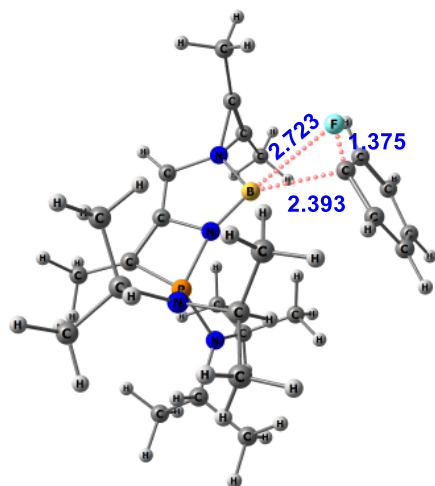

**9TS<sup>C-F</sup>**

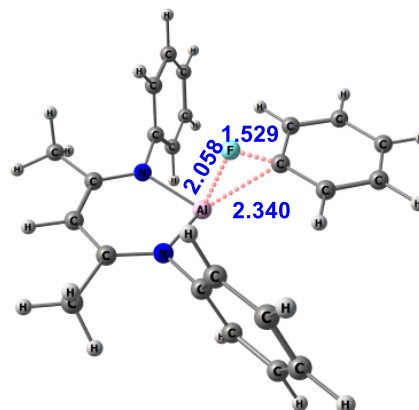

**IIIa-TS<sup>C-F</sup>**

**Fig. S15** Optimized geometries of the transition states (TS) involved in the activation of C–F bond of C<sub>6</sub>H<sub>5</sub>F by **4-7**, **9** and **IIIa** (bond lengths are given in Å) at M06-D3/Def2-TZVP (Toluene) level of theory.

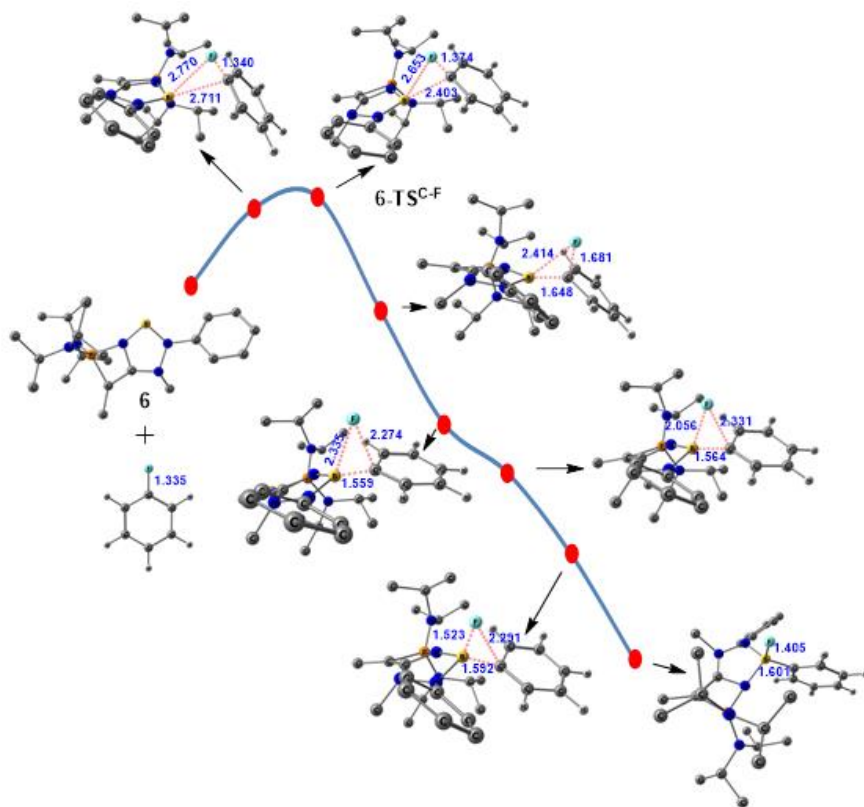

**Fig. S16** Some structures along the reaction pathway obtained from the IRC calculation (M06-D3/Def2-TZVP (Toluene)) for the activation of C-F bond of C<sub>6</sub>H<sub>5</sub>F by **6** (bond lengths are given in Å). The hydrogen atoms of the methyl groups are omitted for clarity.

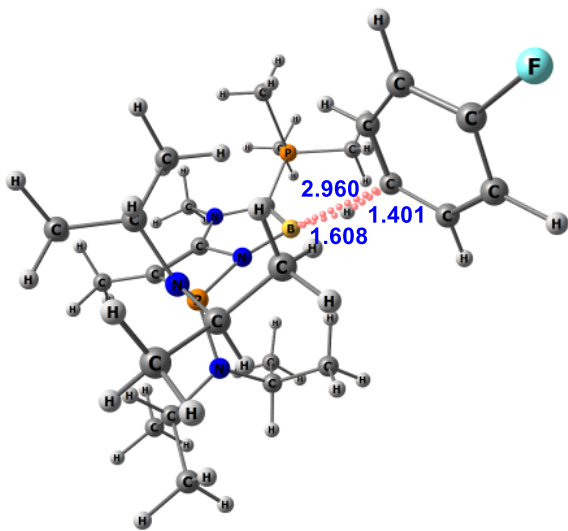

4TS<sup>p</sup>(C-H)

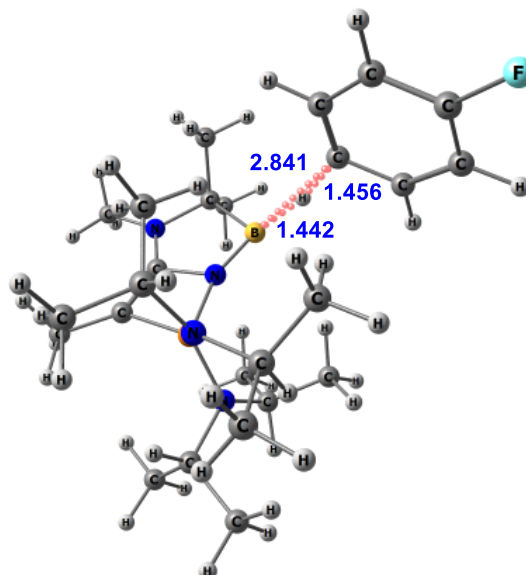

5TS<sup>p</sup>(C-H)

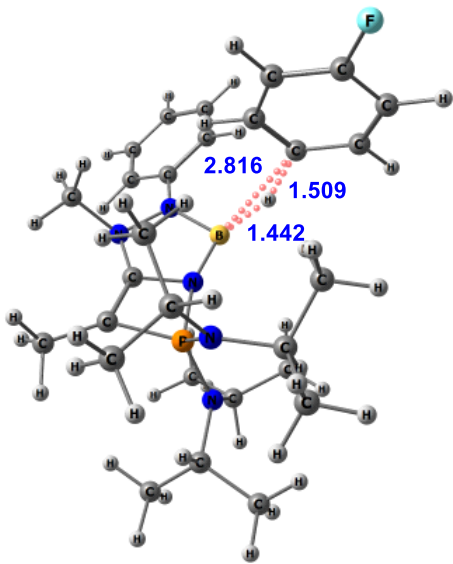

6TS<sup>p</sup>(C-H)

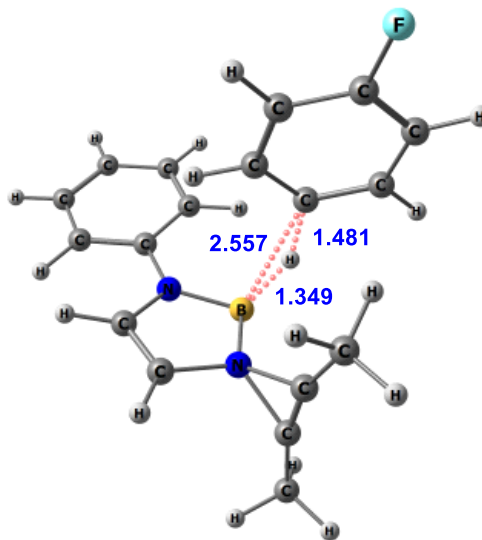

7TS<sup>p</sup>(C-H)

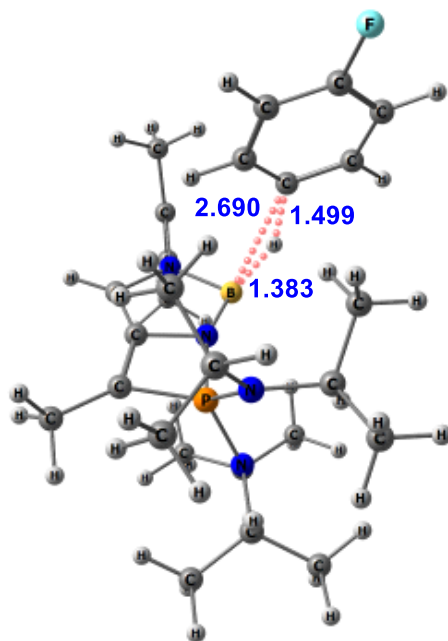

**9TS <sup>$\rho$</sup> (C-H)**

**Fig. S17** Optimized geometries of the transition states (TS) involved in the activation of *para* C–H bond of C<sub>6</sub>H<sub>5</sub>F by **4-7** and **9** (bond lengths are given in Å) at M06-D3/Def2-TZVP (Toluene) level of theory.



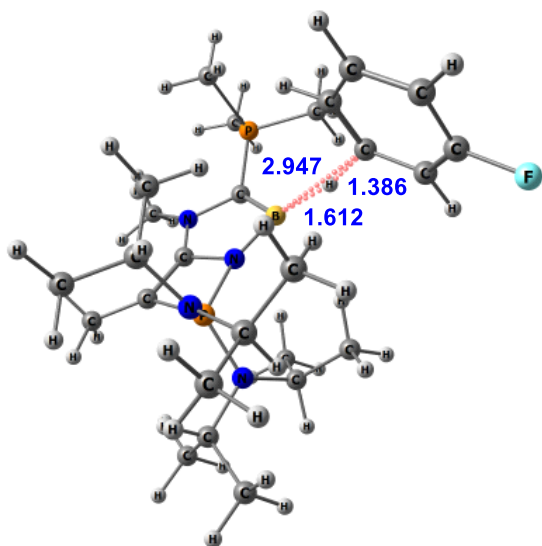

4TS<sup>m</sup>(C-H)

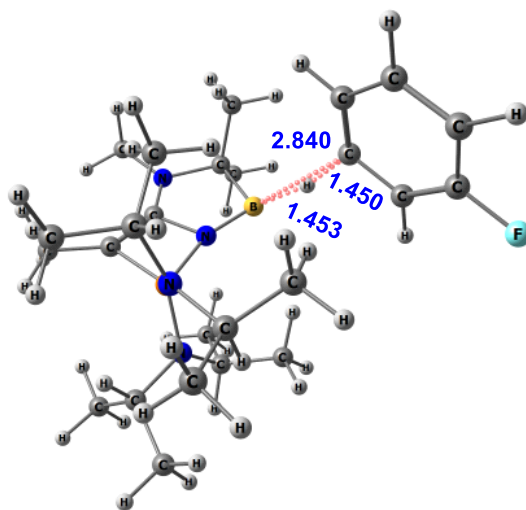

5TS<sup>m</sup>(C-H)

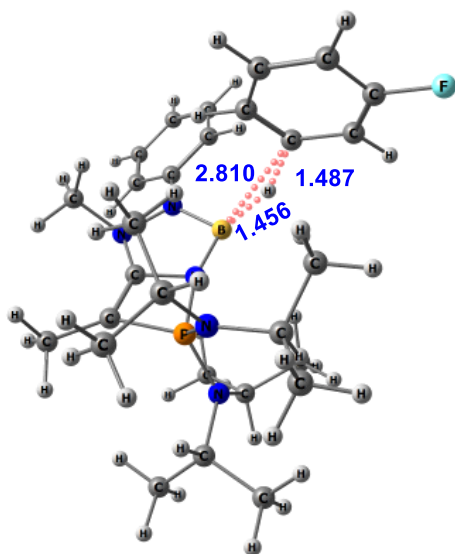

6TS<sup>m</sup>(C-H)

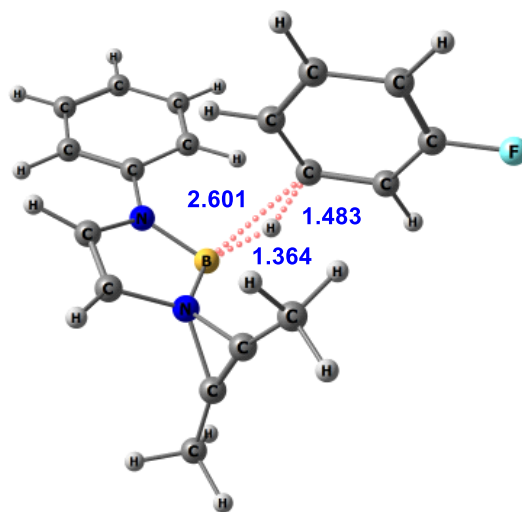

7TS<sup>m</sup>(C-H)

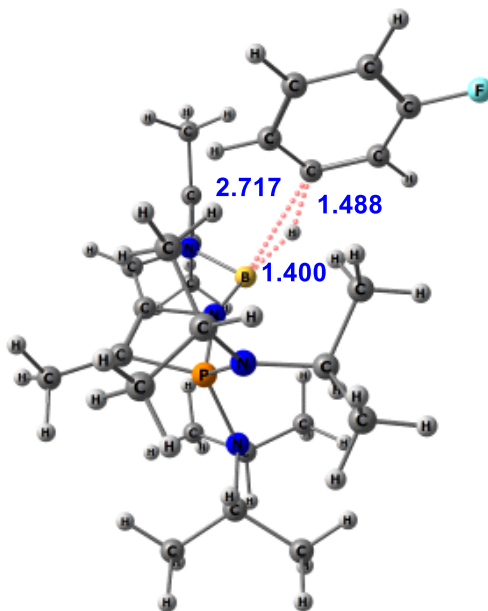

**9TS<sup>m</sup>(C-H)**

**Fig. S18** Optimized geometries of the transition states (TS) involved in the activation of *meta* C–H bond of C<sub>6</sub>H<sub>5</sub>F by **4-7** and **9** (bond lengths are given in Å) at M06-D3/Def2-TZVP (Toluene) level of theory.

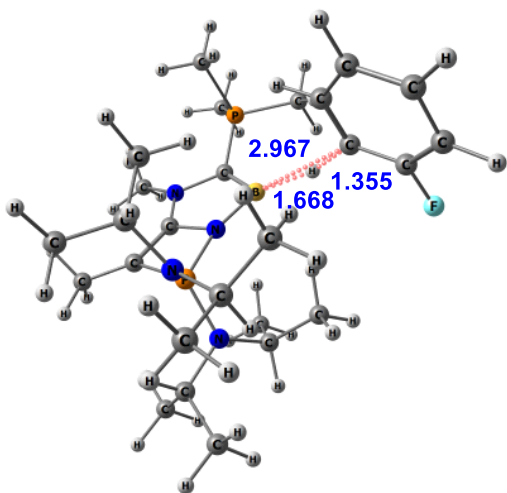

4TS<sup>o</sup>(C-H)

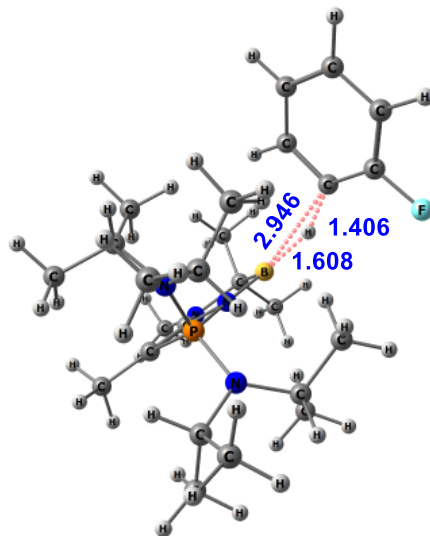

5TS<sup>o</sup>(C-H)

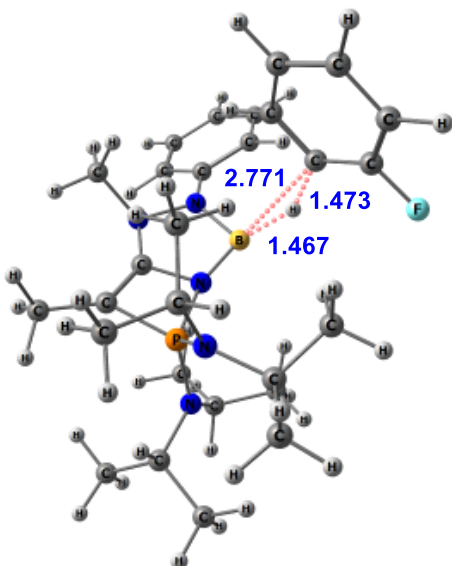

6TS<sup>o</sup>(C-H)

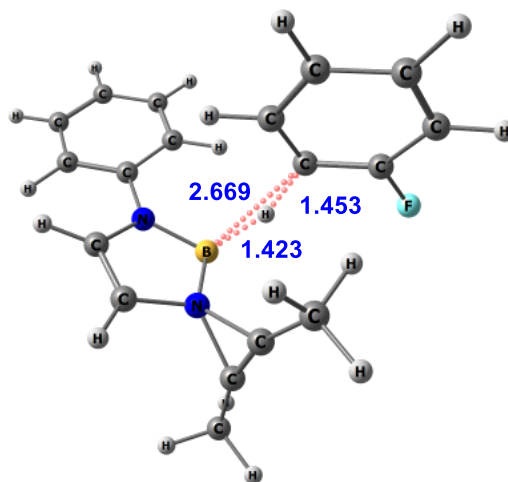

7TS<sup>o</sup>(C-H)

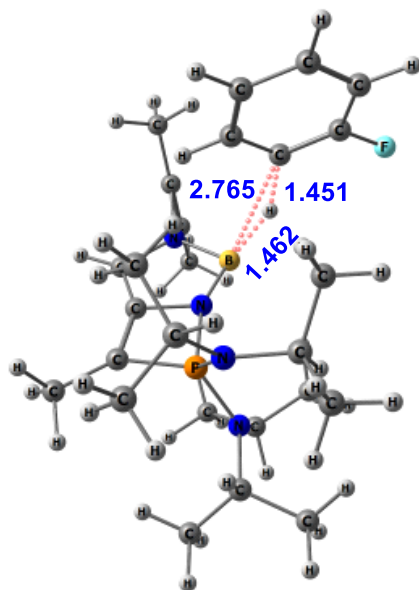

**9TS<sup>o</sup>(C-H)**

**Fig. S19** Optimized geometries of the transition states (TS) involved in the activation of *ortho* C–H bond of C<sub>6</sub>H<sub>5</sub>F by **4-7** and **9** (bond lengths are given in Å) at M06-D3/Def2-TZVP (Toluene) level of theory.

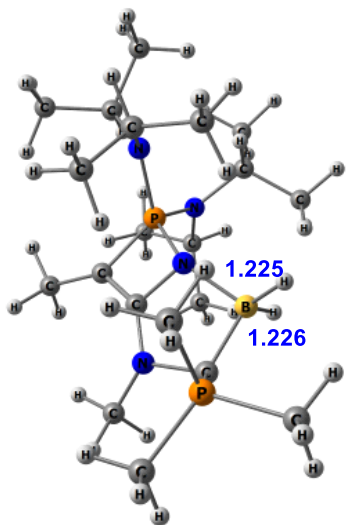

4P<sup>H-H</sup>

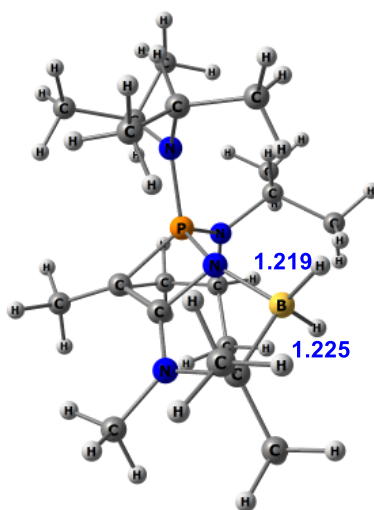

5P<sup>H-H</sup>

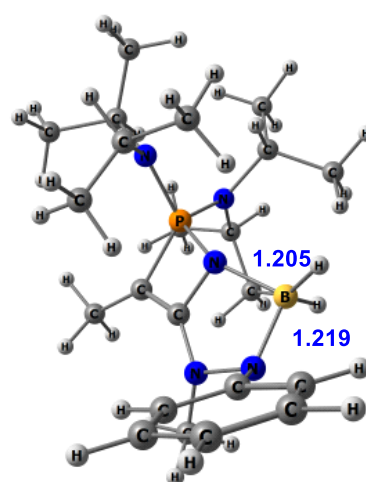

6P<sup>H-H</sup>

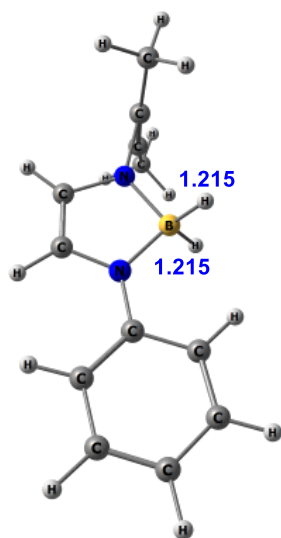

7P<sup>H-H</sup>

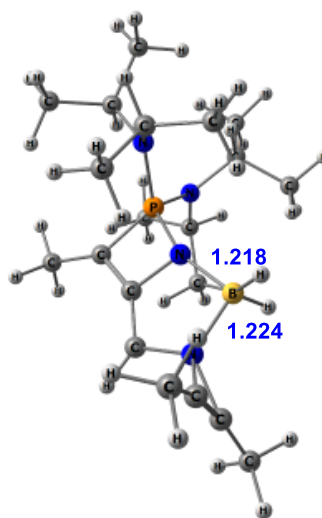

9P<sup>H-H</sup>

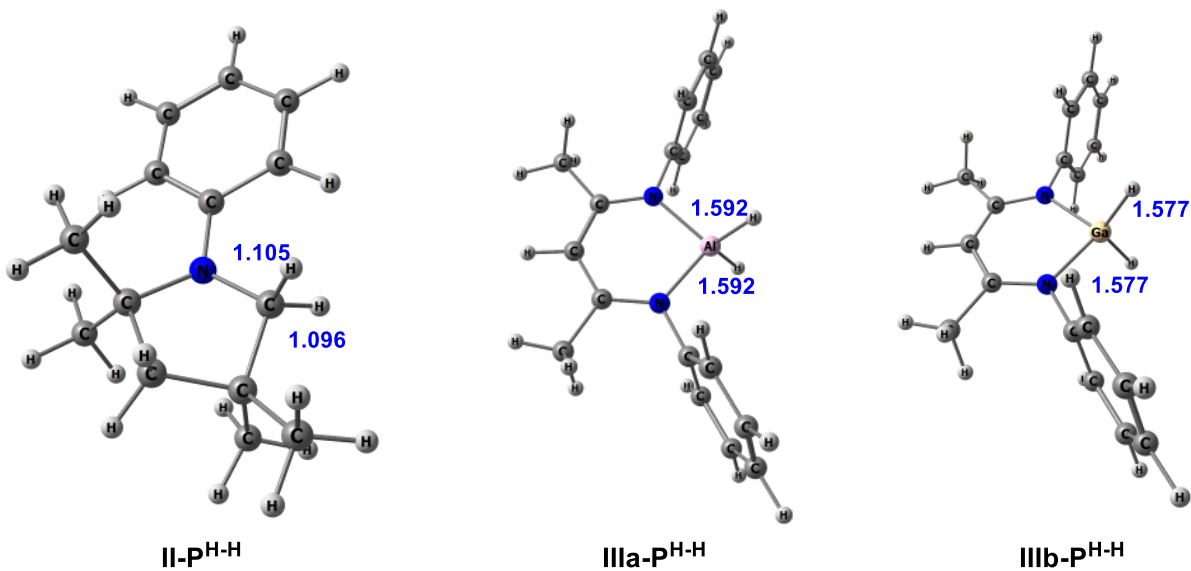

**Fig. S20** Optimized geometries of the H–H splitting product obtained for the molecules **4-7**, **9**, **II**, **IIIa** and **IIIb** at M06-D3/Def2-TZVP (Toluene) level of theory.

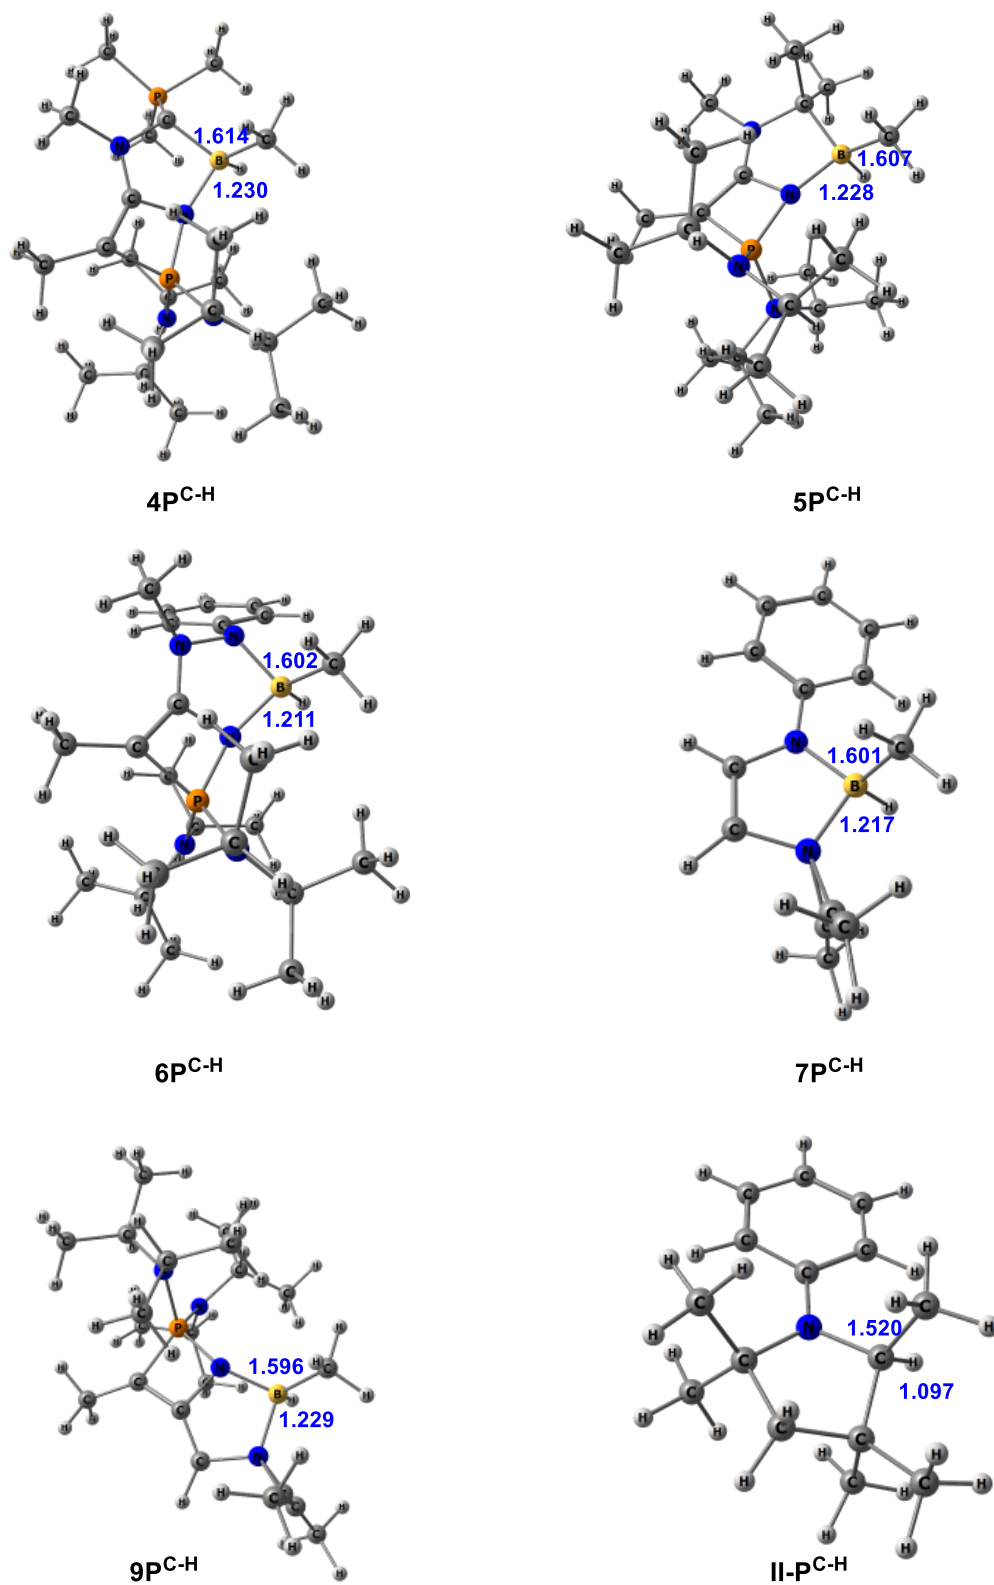

**Fig. S21** Optimized geometries of the C-H splitting product obtained for the molecules **4-7, 9** and **II** at M06-D3/Def2-TZVP (Toluene) level of theory.

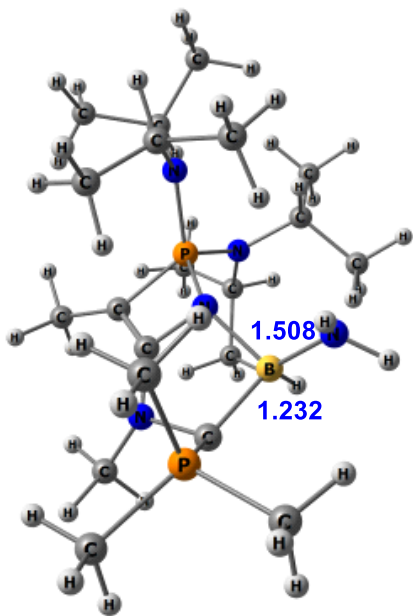

4P<sup>N</sup>-H

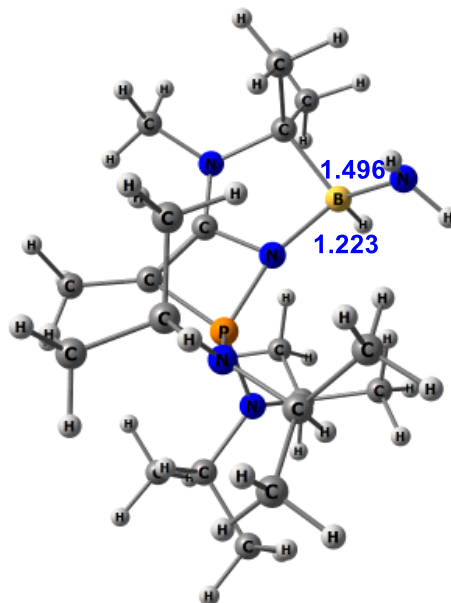

5P<sup>N</sup>-H

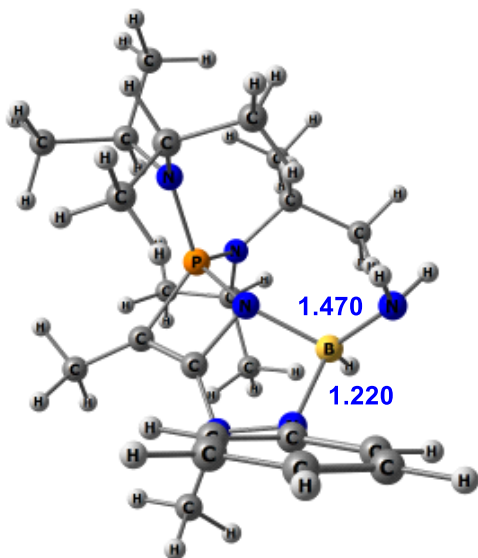

6P<sup>N</sup>-H

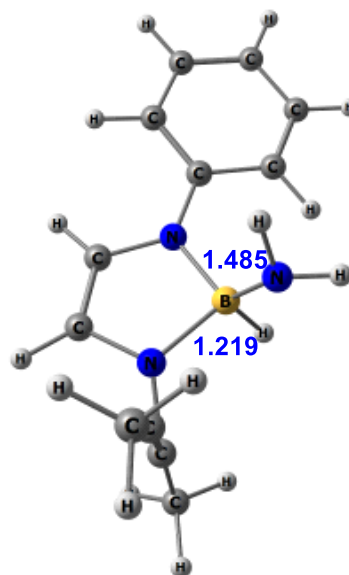

7P<sup>N</sup>-H



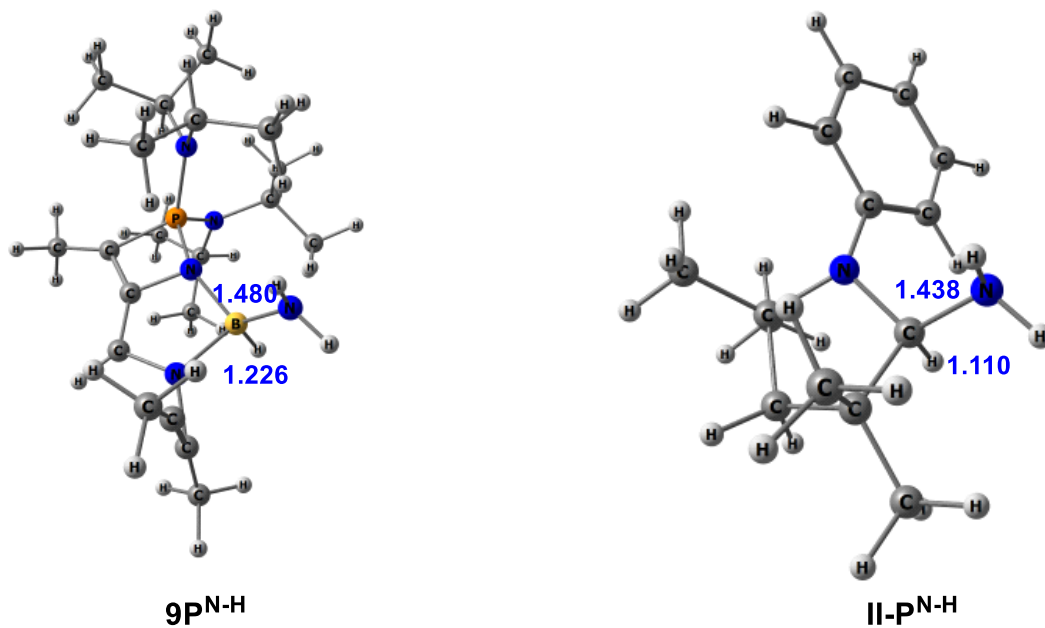

**Fig. S22** Optimized geometries of the N–H splitting product obtained for the molecules **4-7**, **9** and **II** at M06-D3/Def2-TZVP (Toluene) level of theory.

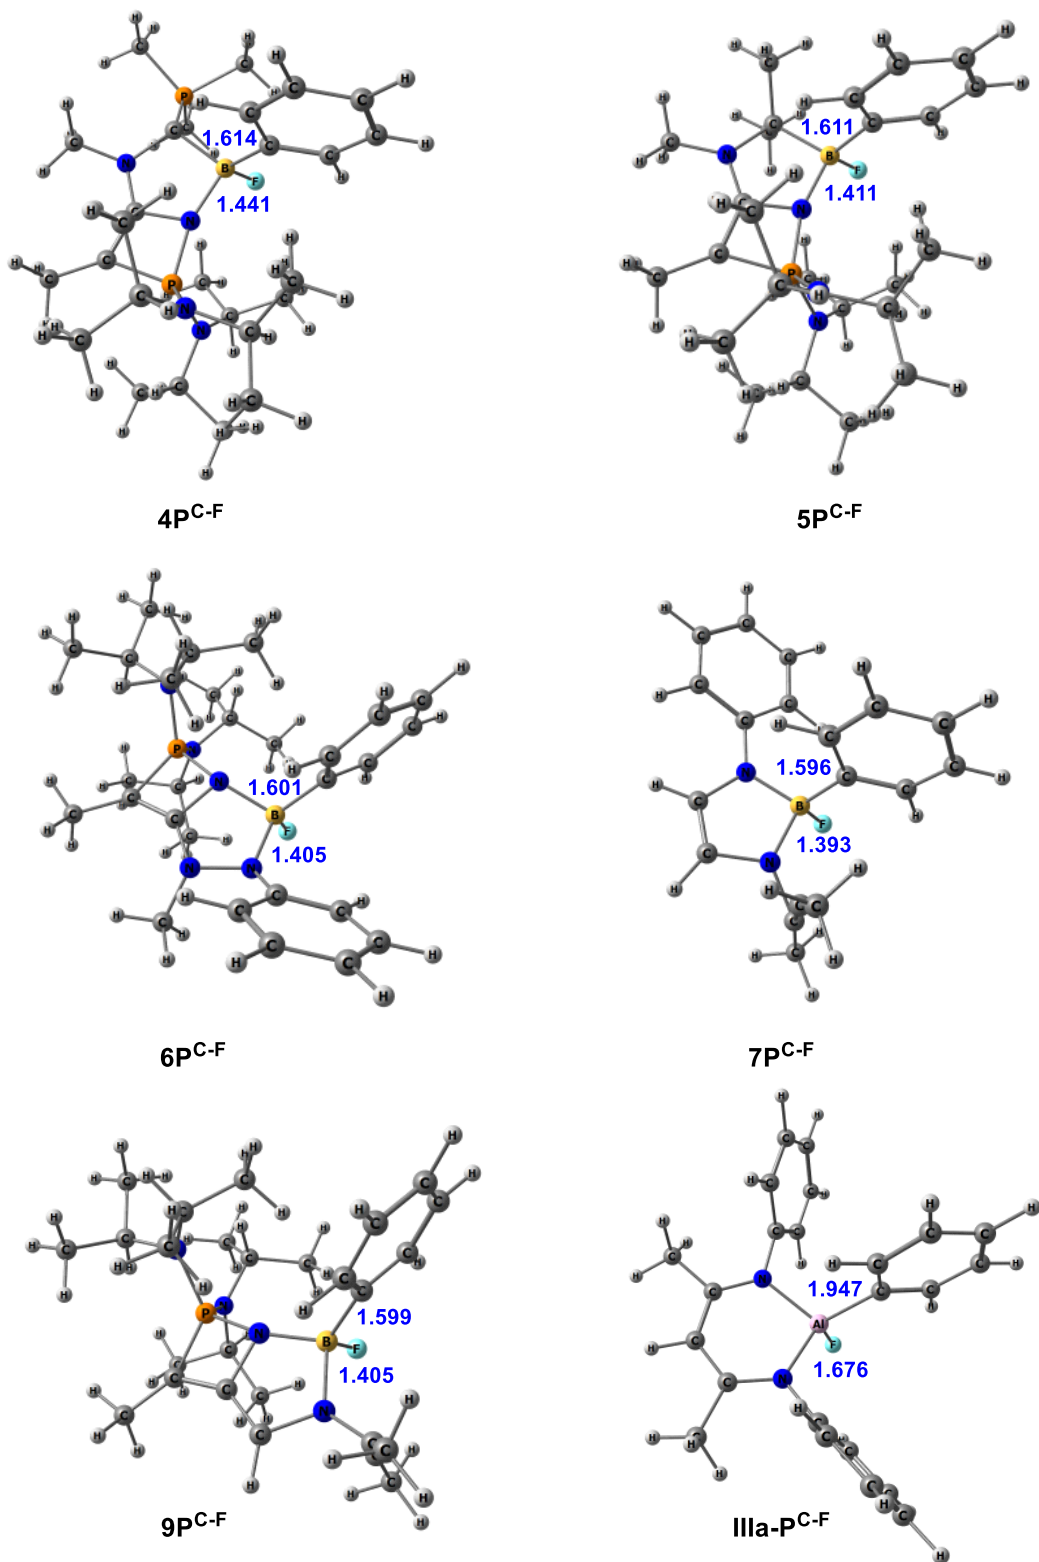

**Fig. S23** Optimized geometries of the C-F splitting product obtained for the molecules **4-7, 9** and **IIIa** at M06-D3/Def2-TZVP (Toluene) level of theory.

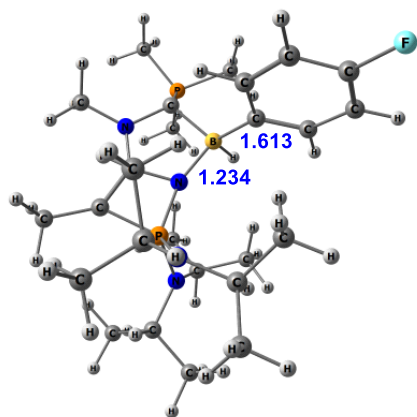

**4P<sub>p</sub>(C-H)**

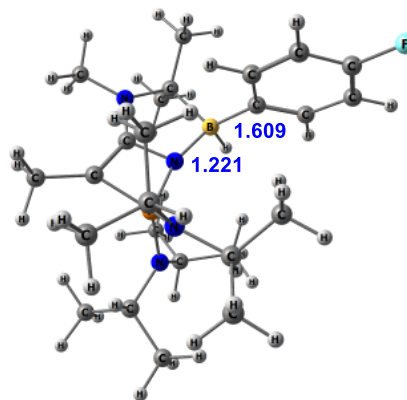

**5P<sub>p</sub>(C-H)**

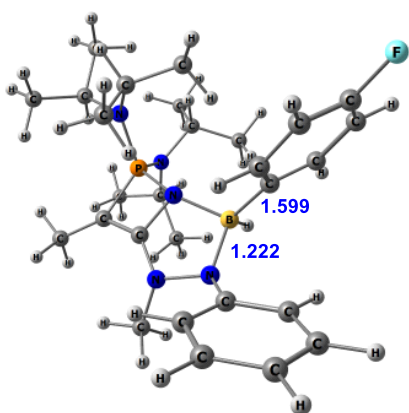

**6P<sub>p</sub>(C-H)**

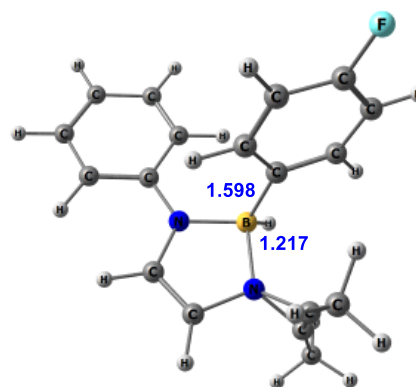

**7P<sub>p</sub>(C-H)**

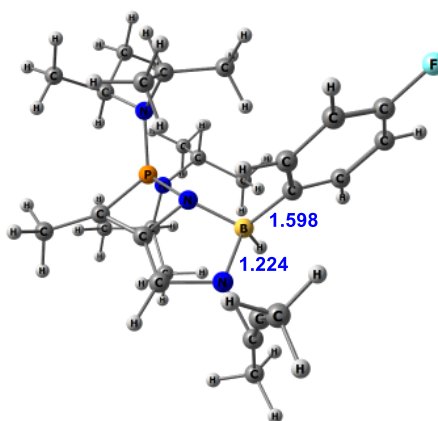

**9P<sub>p</sub>(C-H)**

**Fig. S24** Optimized geometries of the *para* C–H splitting product obtained for the molecules **4-7** and **9** at M06-D3/Def2-TZVP (Toluene) level of theory.

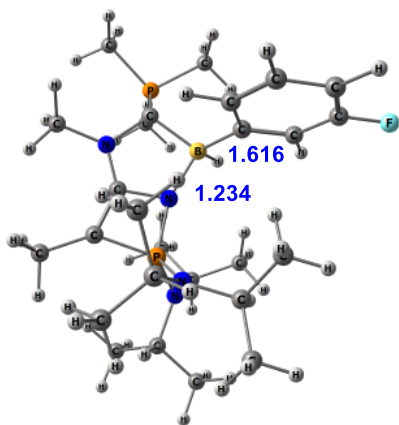

**4pm(C-H)**

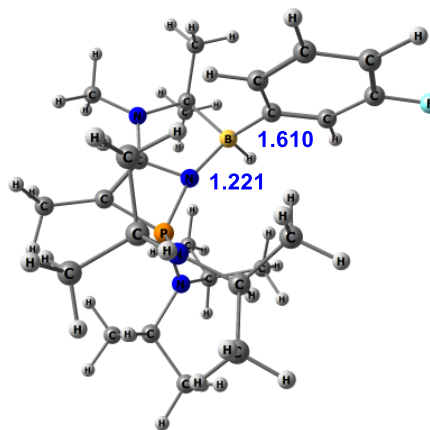

**5pm(C-H)**

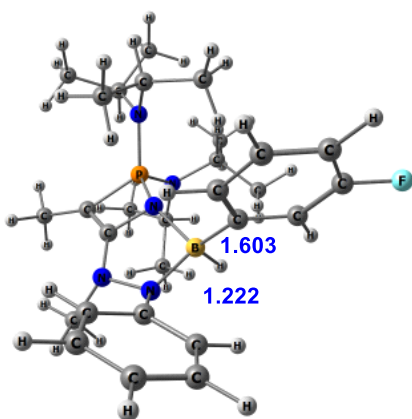

**6pm(C-H)**

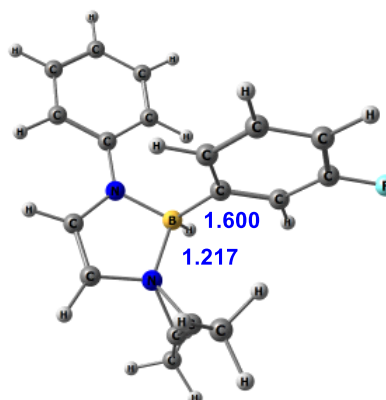

**7pm(C-H)**

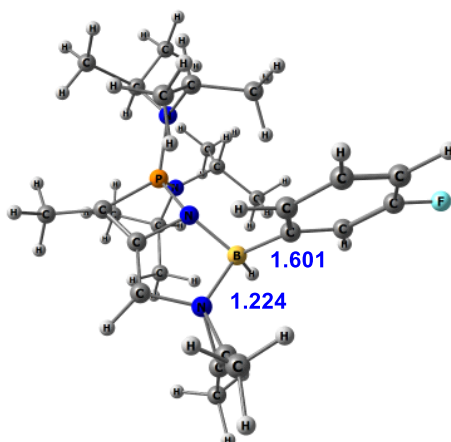

**9pm(C-H)**

**Fig. S25** Optimized geometries of the *meta* C–H splitting product obtained for the molecules **4-7** and **9** at M06-D3/Def2-TZVP (Toluene) level of theory.

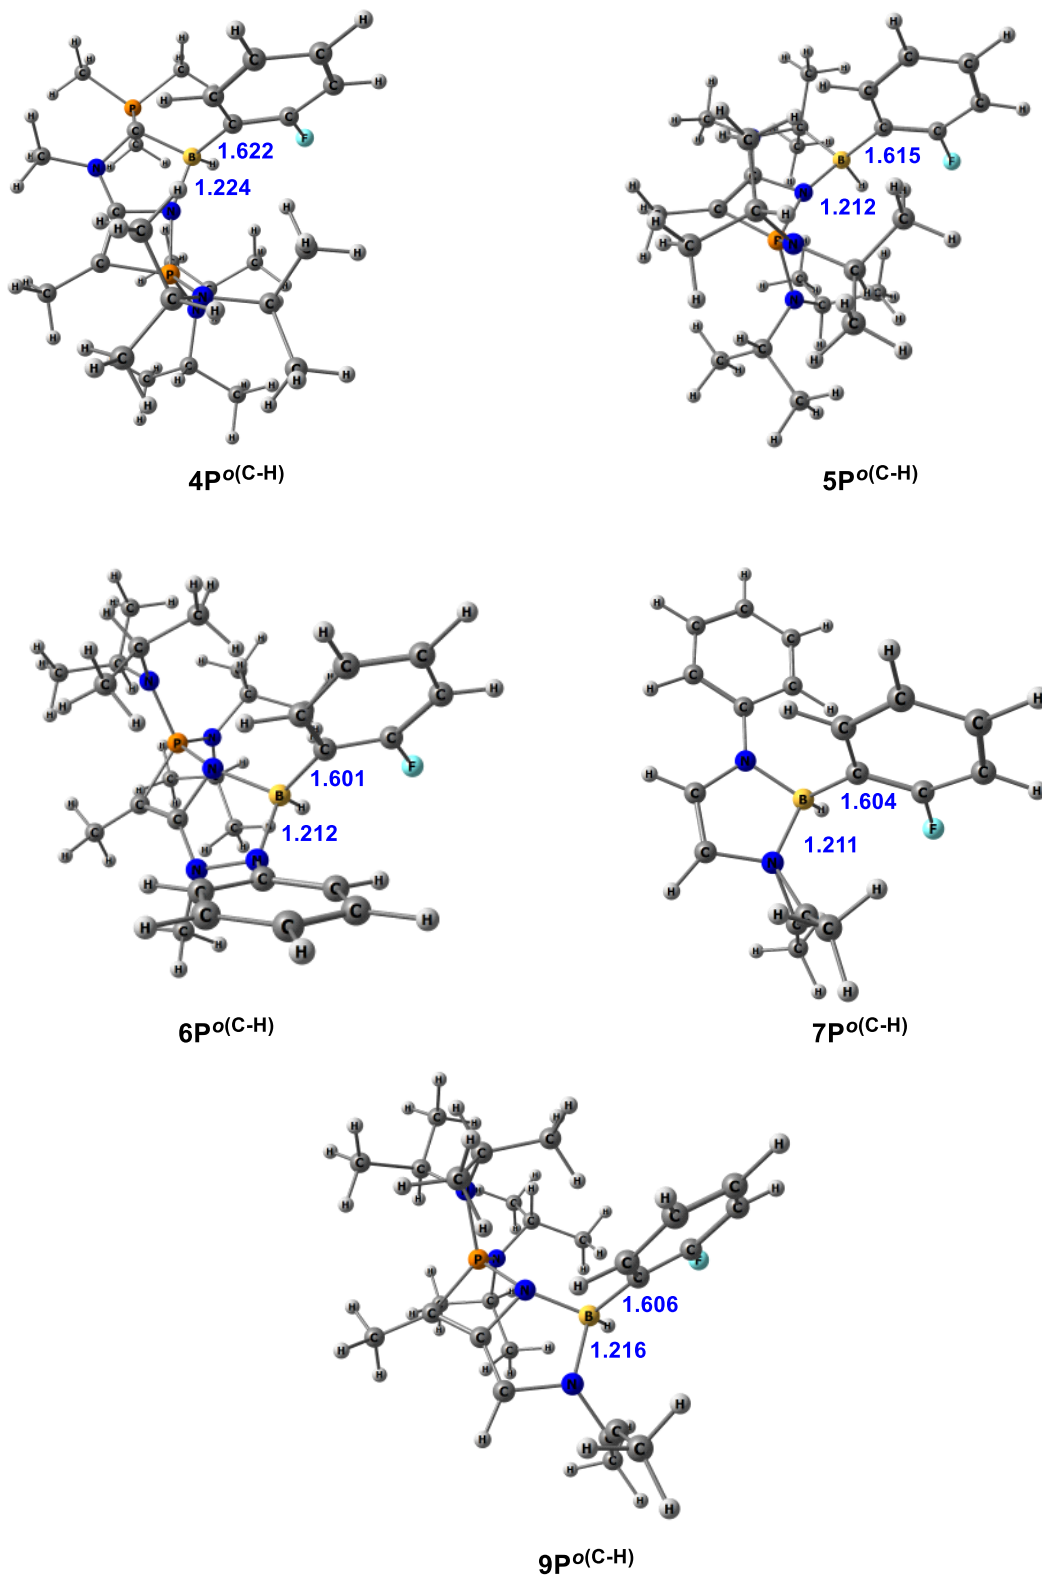

**Fig. S26** Optimized geometries of the *ortho* C-H splitting product obtained for the molecules **4-7** and **9** at M06-D3/Def2-TZVP (Toluene) level of theory.

Cartesian coordinates of **1-9** in their optimized singlet (S) and triplet (T) state, along with their total energies (in hartrees) including zero point vibrational correction.

**1-S** (TE= -943.221706)

|    |              |              |              |
|----|--------------|--------------|--------------|
| 6  | 0.490856000  | 1.343441000  | -0.270313000 |
| 6  | -1.258406000 | -0.021109000 | -0.188154000 |
| 7  | 1.011334000  | 0.124075000  | -0.125480000 |
| 7  | -0.825225000 | 1.324758000  | -0.291490000 |
| 6  | -1.632928000 | 2.505371000  | -0.487513000 |
| 1  | -2.338922000 | 2.625696000  | 0.338608000  |
| 1  | -0.996995000 | 3.388459000  | -0.523907000 |
| 1  | -2.192723000 | 2.436585000  | -1.423078000 |
| 15 | -2.867642000 | -0.510224000 | 0.114631000  |
| 6  | -4.142879000 | 0.256736000  | -0.915415000 |
| 1  | -5.101420000 | -0.230049000 | -0.725566000 |
| 1  | -4.244557000 | 1.319068000  | -0.693446000 |
| 1  | -3.879239000 | 0.134709000  | -1.966565000 |
| 6  | -3.457128000 | -0.236727000 | 1.803237000  |
| 1  | -4.488513000 | -0.576128000 | 1.920732000  |
| 1  | -2.805642000 | -0.788034000 | 2.483006000  |
| 1  | -3.397597000 | 0.824785000  | 2.049630000  |
| 6  | -3.015310000 | -2.268890000 | -0.170599000 |
| 1  | -4.014706000 | -2.595578000 | 0.126684000  |
| 1  | -2.846347000 | -2.478657000 | -1.226466000 |
| 1  | -2.240064000 | -2.776180000 | 0.403608000  |
| 6  | 2.411237000  | -0.052761000 | -0.029847000 |
| 6  | 3.222741000  | 0.895677000  | 0.581172000  |
| 6  | 2.982500000  | -1.207843000 | -0.547904000 |
| 6  | 4.592104000  | 0.699952000  | 0.652190000  |
| 1  | 2.779842000  | 1.777081000  | 1.032306000  |
| 6  | 4.349045000  | -1.398974000 | -0.469303000 |
| 1  | 2.322458000  | -1.943918000 | -0.992309000 |
| 6  | 5.162274000  | -0.446014000 | 0.125714000  |
| 1  | 5.213342000  | 1.444117000  | 1.137593000  |
| 1  | 4.785024000  | -2.302662000 | -0.880106000 |
| 1  | 6.233153000  | -0.600760000 | 0.186594000  |
| 1  | 1.046665000  | 2.263576000  | -0.410145000 |
| 5  | -0.069305000 | -0.964750000 | -0.027486000 |

**1-T** (TE= -943.196703)

|   |              |             |              |
|---|--------------|-------------|--------------|
| 6 | 0.485623000  | 1.504041000 | 0.145099000  |
| 6 | -1.293168000 | 0.065296000 | -0.152893000 |
| 7 | 1.032484000  | 0.226928000 | -0.068819000 |
| 7 | -0.912248000 | 1.429685000 | 0.112652000  |

|    |              |              |              |
|----|--------------|--------------|--------------|
| 6  | -1.609349000 | 2.505191000  | -0.545250000 |
| 1  | -2.657827000 | 2.533807000  | -0.235027000 |
| 1  | -1.161776000 | 3.458919000  | -0.259623000 |
| 1  | -1.574987000 | 2.413654000  | -1.643093000 |
| 15 | -2.861614000 | -0.543036000 | 0.080088000  |
| 6  | -4.096888000 | -0.052079000 | -1.147965000 |
| 1  | -5.060721000 | -0.517114000 | -0.930160000 |
| 1  | -4.218470000 | 1.031704000  | -1.146176000 |
| 1  | -3.754295000 | -0.361588000 | -2.135843000 |
| 6  | -3.618278000 | -0.077011000 | 1.652523000  |
| 1  | -4.639268000 | -0.455951000 | 1.723822000  |
| 1  | -3.015849000 | -0.473954000 | 2.469644000  |
| 1  | -3.634559000 | 1.011151000  | 1.733087000  |
| 6  | -2.803805000 | -2.332864000 | 0.007275000  |
| 1  | -3.815975000 | -2.735676000 | 0.068995000  |
| 1  | -2.344226000 | -2.638355000 | -0.933053000 |
| 1  | -2.201245000 | -2.712347000 | 0.832122000  |
| 6  | 2.395620000  | -0.019177000 | -0.021207000 |
| 6  | 3.310747000  | 0.983524000  | 0.309279000  |
| 6  | 2.880559000  | -1.298068000 | -0.312118000 |
| 6  | 4.667494000  | 0.704112000  | 0.341856000  |
| 1  | 2.953010000  | 1.972920000  | 0.566360000  |
| 6  | 4.232101000  | -1.562614000 | -0.275418000 |
| 1  | 2.165792000  | -2.075088000 | -0.570142000 |
| 6  | 5.142557000  | -0.561962000 | 0.049898000  |
| 1  | 5.362230000  | 1.494716000  | 0.604543000  |
| 1  | 4.584435000  | -2.562190000 | -0.505537000 |
| 1  | 6.205145000  | -0.771551000 | 0.074739000  |
| 1  | 0.956060000  | 2.368638000  | -0.320981000 |
| 5  | -0.044837000 | -0.716555000 | -0.241662000 |

**2-S (TE= -562.014638)**

|   |              |              |              |
|---|--------------|--------------|--------------|
| 6 | -0.685290000 | 0.923800000  | -0.351961000 |
| 6 | -2.275224000 | -0.621258000 | 0.222841000  |
| 7 | 0.043313000  | -0.128714000 | 0.014071000  |
| 7 | -1.970685000 | 0.768841000  | -0.273180000 |
| 6 | -2.946410000 | 1.770426000  | -0.631597000 |
| 1 | -3.596919000 | 1.982202000  | 0.218872000  |
| 1 | -2.447493000 | 2.692132000  | -0.928362000 |
| 1 | -3.563849000 | 1.420908000  | -1.461296000 |
| 6 | 1.461514000  | -0.062780000 | 0.014418000  |
| 6 | 2.127780000  | 1.093987000  | 0.394304000  |
| 6 | 2.183630000  | -1.187813000 | -0.355011000 |
| 6 | 3.512146000  | 1.130493000  | 0.380743000  |
| 1 | 1.567864000  | 1.959161000  | 0.733433000  |
| 6 | 3.565193000  | -1.145826000 | -0.359853000 |

|   |              |              |              |
|---|--------------|--------------|--------------|
| 1 | 1.634988000  | -2.084227000 | -0.618989000 |
| 6 | 4.235218000  | 0.012755000  | 0.002271000  |
| 1 | 4.025903000  | 2.034962000  | 0.684876000  |
| 1 | 4.124361000  | -2.027389000 | -0.651063000 |
| 1 | 5.318356000  | 0.040516000  | -0.000872000 |
| 1 | -0.254925000 | 1.854796000  | -0.718448000 |
| 5 | -0.823791000 | -1.315345000 | 0.422735000  |
| 6 | -3.028382000 | -0.514958000 | 1.535499000  |
| 1 | -3.994907000 | -0.013409000 | 1.411563000  |
| 1 | -3.213345000 | -1.518042000 | 1.920646000  |
| 1 | -2.446721000 | 0.024747000  | 2.288207000  |
| 6 | -3.092072000 | -1.341126000 | -0.833289000 |
| 1 | -3.260183000 | -2.368357000 | -0.508160000 |
| 1 | -4.067726000 | -0.867065000 | -0.990489000 |
| 1 | -2.563458000 | -1.381299000 | -1.790026000 |

**2-T** (TE= -562.001152)

|   |              |              |              |
|---|--------------|--------------|--------------|
| 6 | -0.692436000 | 1.117136000  | -0.065680000 |
| 6 | -2.286854000 | -0.634386000 | 0.135131000  |
| 7 | 0.062415000  | -0.044971000 | 0.048520000  |
| 7 | -2.021440000 | 0.830524000  | 0.122458000  |
| 6 | -3.012611000 | 1.767490000  | -0.326487000 |
| 1 | -3.982800000 | 1.525869000  | 0.110672000  |
| 1 | -2.741581000 | 2.772487000  | 0.004204000  |
| 1 | -3.122720000 | 1.786292000  | -1.420657000 |
| 6 | 1.471366000  | -0.028050000 | 0.028531000  |
| 6 | 2.183184000  | 1.149447000  | 0.213161000  |
| 6 | 2.156734000  | -1.219890000 | -0.177449000 |
| 6 | 3.568542000  | 1.128646000  | 0.189073000  |
| 1 | 1.652881000  | 2.075011000  | 0.402894000  |
| 6 | 3.536968000  | -1.233027000 | -0.191413000 |
| 1 | 1.584069000  | -2.130133000 | -0.329116000 |
| 6 | 4.251825000  | -0.057089000 | -0.011950000 |
| 1 | 4.115961000  | 2.052489000  | 0.336564000  |
| 1 | 4.060467000  | -2.168485000 | -0.351227000 |
| 1 | 5.335002000  | -0.068021000 | -0.029530000 |
| 1 | -0.358284000 | 1.968425000  | -0.647621000 |
| 5 | -0.787152000 | -1.144756000 | 0.266288000  |
| 6 | -2.879655000 | -1.094234000 | -1.196621000 |
| 1 | -2.943086000 | -2.184279000 | -1.222562000 |
| 1 | -3.889514000 | -0.696412000 | -1.342563000 |
| 1 | -2.258852000 | -0.770334000 | -2.037212000 |
| 6 | -3.207587000 | -1.001669000 | 1.282943000  |
| 1 | -4.189667000 | -0.529815000 | 1.170495000  |
| 1 | -3.362696000 | -2.082480000 | 1.310541000  |
| 1 | -2.787103000 | -0.691950000 | 2.241389000  |



**3-S** (TE= -730.417201)

|   |              |              |              |
|---|--------------|--------------|--------------|
| 6 | 0.724582000  | 1.272322000  | -0.438740000 |
| 7 | 1.221177000  | 0.093831000  | -0.091921000 |
| 7 | -0.584721000 | 1.267321000  | -0.457898000 |
| 6 | -1.431187000 | 2.284092000  | -1.045990000 |
| 1 | -2.121627000 | 2.699173000  | -0.313600000 |
| 1 | -0.795001000 | 3.077888000  | -1.432019000 |
| 1 | -2.005354000 | 1.850965000  | -1.866243000 |
| 6 | 2.616235000  | -0.114210000 | 0.041698000  |
| 6 | 3.450709000  | 0.892616000  | 0.506214000  |
| 6 | 3.143267000  | -1.352852000 | -0.293201000 |
| 6 | 4.812660000  | 0.666472000  | 0.612177000  |
| 1 | 3.034443000  | 1.844980000  | 0.816421000  |
| 6 | 4.503087000  | -1.572255000 | -0.178594000 |
| 1 | 2.464065000  | -2.127280000 | -0.629120000 |
| 6 | 5.343664000  | -0.564746000 | 0.269275000  |
| 1 | 5.458039000  | 1.455016000  | 0.981070000  |
| 1 | 4.910470000  | -2.541000000 | -0.443300000 |
| 1 | 6.408595000  | -0.742633000 | 0.359874000  |
| 1 | 1.287989000  | 2.151454000  | -0.723143000 |
| 5 | 0.112359000  | -0.930830000 | 0.154005000  |
| 7 | -1.001517000 | -0.033827000 | -0.124967000 |
| 6 | -2.386721000 | -0.252724000 | 0.058509000  |
| 6 | -2.992939000 | -1.305560000 | -0.612800000 |
| 6 | -3.134527000 | 0.536075000  | 0.923400000  |
| 6 | -4.339090000 | -1.559918000 | -0.424925000 |
| 1 | -2.384890000 | -1.922059000 | -1.263680000 |
| 6 | -4.485222000 | 0.286932000  | 1.094000000  |
| 1 | -2.647013000 | 1.324219000  | 1.486751000  |
| 6 | -5.091629000 | -0.760346000 | 0.420818000  |
| 1 | -4.804737000 | -2.387464000 | -0.947144000 |
| 1 | -5.061570000 | 0.903834000  | 1.773543000  |
| 1 | -6.147102000 | -0.959608000 | 0.563031000  |

**3-T** (TE= -730.394338)

|   |              |              |              |
|---|--------------|--------------|--------------|
| 6 | 0.713723000  | 1.529130000  | 0.151482000  |
| 7 | 1.213246000  | 0.236818000  | -0.054045000 |
| 7 | -0.683864000 | 1.536925000  | -0.033293000 |
| 6 | -1.131891000 | 2.354496000  | -1.160449000 |
| 1 | -2.218973000 | 2.327625000  | -1.230872000 |
| 1 | -0.821864000 | 3.383723000  | -0.980752000 |
| 1 | -0.697215000 | 2.002337000  | -2.104999000 |
| 6 | 2.567593000  | -0.091281000 | 0.042434000  |
| 6 | 3.507415000  | 0.836996000  | 0.478750000  |
| 6 | 2.985858000  | -1.374194000 | -0.305650000 |
| 6 | 4.843989000  | 0.480656000  | 0.557564000  |

|   |              |              |              |
|---|--------------|--------------|--------------|
| 1 | 3.190793000  | 1.827967000  | 0.780237000  |
| 6 | 4.318275000  | -1.718516000 | -0.219755000 |
| 1 | 2.245734000  | -2.091848000 | -0.647939000 |
| 6 | 5.259542000  | -0.791701000 | 0.209436000  |
| 1 | 5.566470000  | 1.211633000  | 0.902304000  |
| 1 | 4.627997000  | -2.720275000 | -0.494399000 |
| 1 | 6.306215000  | -1.063302000 | 0.272422000  |
| 1 | 1.262644000  | 2.394099000  | -0.202481000 |
| 5 | 0.100492000  | -0.627628000 | -0.236733000 |
| 7 | -1.061061000 | 0.170454000  | -0.187499000 |
| 6 | -2.397954000 | -0.188440000 | 0.002414000  |
| 6 | -2.815585000 | -1.446571000 | -0.425441000 |
| 6 | -3.307439000 | 0.663418000  | 0.618549000  |
| 6 | -4.120591000 | -1.848275000 | -0.224159000 |
| 1 | -2.100436000 | -2.098002000 | -0.917947000 |
| 6 | -4.616654000 | 0.252199000  | 0.803653000  |
| 1 | -2.975716000 | 1.632503000  | 0.969917000  |
| 6 | -5.032751000 | -1.000325000 | 0.387296000  |
| 1 | -4.431666000 | -2.831312000 | -0.558459000 |
| 1 | -5.317104000 | 0.922493000  | 1.288706000  |
| 1 | -6.058763000 | -1.314447000 | 0.535034000  |

**4-S** (TE= -1713.496545)

|    |              |              |              |
|----|--------------|--------------|--------------|
| 6  | 0.867080000  | -0.426819000 | 1.002512000  |
| 6  | 2.719972000  | -0.474972000 | -0.305535000 |
| 7  | 0.503643000  | 0.002153000  | -0.287613000 |
| 7  | 2.170887000  | -0.625729000 | 1.061251000  |
| 6  | 2.813338000  | -1.310801000 | 2.151026000  |
| 1  | 3.578225000  | -0.688127000 | 2.626659000  |
| 1  | 2.078824000  | -1.578961000 | 2.911730000  |
| 1  | 3.292250000  | -2.225560000 | 1.787149000  |
| 15 | 4.287450000  | 0.144462000  | -0.529529000 |
| 6  | 5.621847000  | -0.768187000 | 0.296567000  |
| 1  | 6.589758000  | -0.345323000 | 0.019946000  |
| 1  | 5.516818000  | -0.711834000 | 1.380506000  |
| 1  | 5.582114000  | -1.814777000 | -0.007691000 |
| 6  | 4.589828000  | 1.848219000  | 0.030410000  |
| 1  | 5.634615000  | 2.145430000  | -0.087618000 |
| 1  | 3.944320000  | 2.513976000  | -0.545003000 |
| 1  | 4.312280000  | 1.924842000  | 1.084559000  |
| 6  | 4.730184000  | 0.112057000  | -2.265264000 |
| 1  | 5.733834000  | 0.527383000  | -2.385968000 |
| 1  | 4.706588000  | -0.917749000 | -2.620774000 |
| 1  | 3.993642000  | 0.686496000  | -2.824718000 |
| 15 | -1.079295000 | -0.061320000 | 0.239764000  |
| 6  | -0.326791000 | -0.557764000 | 1.721783000  |

|   |              |              |              |
|---|--------------|--------------|--------------|
| 7 | -1.838320000 | 1.398143000  | 0.115937000  |
| 7 | -2.072616000 | -1.132853000 | -0.519124000 |
| 6 | -0.706536000 | -3.233038000 | -0.148850000 |
| 1 | -0.096275000 | -2.942316000 | -1.006654000 |
| 1 | -0.161998000 | -2.966845000 | 0.759669000  |
| 1 | -0.825586000 | -4.318919000 | -0.164026000 |
| 6 | -2.889245000 | -2.848522000 | 1.055993000  |
| 1 | -3.900577000 | -2.447843000 | 0.955296000  |
| 1 | -2.961778000 | -3.923169000 | 1.239558000  |
| 1 | -2.425663000 | -2.391460000 | 1.932396000  |
| 6 | -4.110629000 | -1.140819000 | -1.929852000 |
| 1 | -4.677138000 | -0.745563000 | -1.083122000 |
| 1 | -4.536882000 | -0.728063000 | -2.846891000 |
| 1 | -4.260779000 | -2.222942000 | -1.964304000 |
| 6 | -1.823994000 | -1.315362000 | -2.985375000 |
| 1 | -0.783683000 | -0.978010000 | -2.916398000 |
| 1 | -1.834579000 | -2.409058000 | -3.004189000 |
| 1 | -2.235354000 | -0.967547000 | -3.935739000 |
| 6 | -4.194862000 | 2.141901000  | -0.095154000 |
| 1 | -5.170834000 | 2.106185000  | 0.393695000  |
| 1 | -3.967593000 | 3.192855000  | -0.290211000 |
| 1 | -4.275230000 | 1.629142000  | -1.055287000 |
| 6 | -3.045616000 | 2.187846000  | 2.139647000  |
| 1 | -2.302367000 | 1.700508000  | 2.774881000  |
| 1 | -2.763815000 | 3.238460000  | 2.031252000  |
| 1 | -4.009803000 | 2.158235000  | 2.651865000  |
| 6 | -0.670027000 | -0.900229000 | 3.123182000  |
| 1 | -0.574920000 | -1.970691000 | 3.353932000  |
| 1 | -0.045234000 | -0.361796000 | 3.844261000  |
| 1 | -1.704980000 | -0.626393000 | 3.347467000  |
| 6 | -2.077122000 | -2.577938000 | -0.194144000 |
| 6 | -2.644511000 | -0.764399000 | -1.836341000 |
| 1 | -2.609516000 | -3.040641000 | -1.029529000 |
| 1 | -2.583552000 | 0.325959000  | -1.884128000 |
| 6 | -3.146349000 | 1.496288000  | 0.791700000  |
| 1 | -3.466945000 | 0.461333000  | 0.974883000  |
| 6 | -1.154789000 | 2.664507000  | -0.231643000 |
| 1 | -1.905936000 | 3.435402000  | -0.031382000 |
| 6 | -0.825512000 | 2.717895000  | -1.709105000 |
| 1 | -1.729244000 | 2.591917000  | -2.311422000 |
| 1 | -0.382775000 | 3.685112000  | -1.959943000 |
| 1 | -0.100445000 | 1.940479000  | -1.983964000 |
| 6 | 0.049518000  | 2.993146000  | 0.636770000  |
| 1 | -0.185390000 | 2.892168000  | 1.698411000  |
| 1 | 0.898598000  | 2.347183000  | 0.403451000  |
| 1 | 0.355874000  | 4.025401000  | 0.451843000  |

5 1.627788000 -0.000411000 -1.284221000

**4-T** (TE= -1713.438930)

6 -0.923976000 -0.666796000 -0.923832000  
6 -2.773161000 -0.914372000 0.457962000  
7 -0.583444000 0.036895000 0.256220000  
7 -2.163337000 -1.131354000 -0.876160000  
6 -2.678081000 -2.102439000 -1.804690000  
1 -3.669090000 -1.807218000 -2.161089000  
1 -2.016327000 -2.194938000 -2.667686000  
1 -2.768900000 -3.076082000 -1.313721000  
15 -4.062790000 0.253243000 0.467690000  
6 -5.544238000 -0.124360000 -0.522972000  
1 -6.396080000 0.485559000 -0.213286000  
1 -5.341946000 0.068559000 -1.578050000  
1 -5.793008000 -1.178955000 -0.393451000  
6 -3.763209000 2.038220000 0.151575000  
1 -4.568650000 2.678815000 0.520303000  
1 -2.835053000 2.297973000 0.671045000  
1 -3.634697000 2.204161000 -0.919681000  
6 -4.665038000 0.265268000 2.169095000  
1 -5.486862000 0.975232000 2.283237000  
1 -4.991517000 -0.737160000 2.447134000  
1 -3.828820000 0.553966000 2.812119000  
15 0.994063000 -0.059223000 -0.271316000  
6 0.253180000 -0.747289000 -1.676239000  
7 1.699436000 1.433748000 -0.219281000  
7 1.990777000 -1.034094000 0.604879000  
6 0.996043000 -3.313819000 0.161068000  
1 0.287850000 -3.092190000 0.965472000  
1 0.476909000 -3.150098000 -0.785321000  
1 1.274039000 -4.369356000 0.218447000  
6 3.157019000 -2.576899000 -0.924969000  
1 4.105877000 -2.065397000 -0.745735000  
1 3.368460000 -3.627024000 -1.139688000  
1 2.698711000 -2.142448000 -1.816384000  
6 3.856816000 -0.690919000 2.202833000  
1 4.417455000 -0.161113000 1.429745000  
1 4.110388000 -0.249446000 3.169106000  
1 4.202422000 -1.727812000 2.221910000  
6 1.575492000 -1.339408000 3.039985000  
1 0.496559000 -1.245718000 2.866625000  
1 1.828236000 -2.403248000 3.063464000  
1 1.810590000 -0.925560000 4.023384000  
6 3.907902000 2.444881000 0.282945000  
1 4.969332000 2.379175000 0.033540000

|   |              |              |              |
|---|--------------|--------------|--------------|
| 1 | 3.619415000  | 3.494872000  | 0.192592000  |
| 1 | 3.783672000  | 2.146574000  | 1.325882000  |
| 6 | 3.229499000  | 1.976919000  | -2.094804000 |
| 1 | 2.686575000  | 1.288540000  | -2.748256000 |
| 1 | 2.829451000  | 2.981978000  | -2.254003000 |
| 1 | 4.277672000  | 1.986959000  | -2.401632000 |
| 6 | 0.575850000  | -1.220767000 | -3.043630000 |
| 1 | 0.670464000  | -2.312148000 | -3.129581000 |
| 1 | -0.184453000 | -0.907899000 | -3.766306000 |
| 1 | 1.522466000  | -0.796580000 | -3.390777000 |
| 6 | 2.243396000  | -2.453733000 | 0.277606000  |
| 6 | 2.359358000  | -0.599561000 | 1.972955000  |
| 1 | 2.800045000  | -2.832961000 | 1.139454000  |
| 1 | 2.076711000  | 0.457165000  | 2.032262000  |
| 6 | 3.106225000  | 1.549899000  | -0.643627000 |
| 1 | 3.522363000  | 0.539713000  | -0.560906000 |
| 6 | 0.903881000  | 2.683427000  | -0.180186000 |
| 1 | 1.634673000  | 3.475363000  | -0.372709000 |
| 6 | 0.335392000  | 2.928500000  | 1.205049000  |
| 1 | 1.133829000  | 2.950897000  | 1.950672000  |
| 1 | -0.182430000 | 3.890768000  | 1.233640000  |
| 1 | -0.381505000 | 2.150265000  | 1.490933000  |
| 6 | -0.150616000 | 2.798429000  | -1.267777000 |
| 1 | 0.273895000  | 2.606279000  | -2.255312000 |
| 1 | -0.972114000 | 2.099513000  | -1.103110000 |
| 1 | -0.563700000 | 3.810364000  | -1.264193000 |
| 5 | -1.569286000 | -0.435416000 | 1.310922000  |

**5-S** (TE= -1332.311847)

|    |              |              |              |
|----|--------------|--------------|--------------|
| 6  | -1.677494000 | -0.112228000 | 0.694307000  |
| 6  | -3.388163000 | -0.217892000 | -0.882479000 |
| 7  | -1.065434000 | -0.251003000 | -0.580326000 |
| 7  | -2.986047000 | -0.164066000 | 0.583242000  |
| 6  | -3.885738000 | 0.113826000  | 1.672763000  |
| 1  | -4.785689000 | -0.497338000 | 1.583096000  |
| 1  | -3.409614000 | -0.125956000 | 2.624115000  |
| 1  | -4.188375000 | 1.166533000  | 1.691848000  |
| 15 | 0.402029000  | -0.015325000 | 0.197672000  |
| 6  | -0.639842000 | 0.073730000  | 1.592281000  |
| 7  | 1.446792000  | -1.269418000 | -0.002845000 |
| 7  | 1.242899000  | 1.335893000  | -0.211784000 |
| 6  | -0.576815000 | 3.056565000  | 0.167824000  |
| 1  | -0.962727000 | 2.814909000  | -0.824960000 |
| 1  | -1.193952000 | 2.543594000  | 0.909410000  |
| 1  | -0.690197000 | 4.131174000  | 0.326290000  |
| 6  | 1.426166000  | 2.900469000  | 1.694837000  |

|   |              |              |              |
|---|--------------|--------------|--------------|
| 1 | 2.498458000  | 2.696598000  | 1.735847000  |
| 1 | 1.261205000  | 3.933619000  | 2.009086000  |
| 1 | 0.926423000  | 2.251779000  | 2.416009000  |
| 6 | 3.443297000  | 1.952391000  | -1.176170000 |
| 1 | 3.934186000  | 1.519160000  | -0.301461000 |
| 1 | 4.090064000  | 1.794090000  | -2.041857000 |
| 1 | 3.368054000  | 3.032055000  | -1.024135000 |
| 6 | 1.379348000  | 1.901954000  | -2.627588000 |
| 1 | 0.428227000  | 1.389563000  | -2.806154000 |
| 1 | 1.179016000  | 2.969262000  | -2.497265000 |
| 1 | 2.000776000  | 1.792825000  | -3.519016000 |
| 6 | 3.912836000  | -1.529647000 | 0.107250000  |
| 1 | 4.776143000  | -1.406613000 | 0.764489000  |
| 1 | 3.938589000  | -2.553425000 | -0.273455000 |
| 1 | 4.029476000  | -0.850179000 | -0.738740000 |
| 6 | 2.478846000  | -2.173703000 | 2.068813000  |
| 1 | 1.565290000  | -1.947455000 | 2.623718000  |
| 1 | 2.439913000  | -3.221807000 | 1.761334000  |
| 1 | 3.328906000  | -2.062089000 | 2.745131000  |
| 6 | -0.556766000 | 0.253681000  | 3.063619000  |
| 1 | -1.006106000 | 1.193425000  | 3.408151000  |
| 1 | -1.046369000 | -0.559059000 | 3.608735000  |
| 1 | 0.484578000  | 0.262718000  | 3.394688000  |
| 6 | 0.890765000  | 2.684664000  | 0.294485000  |
| 6 | 2.093195000  | 1.310443000  | -1.428820000 |
| 1 | 1.434398000  | 3.366839000  | -0.364109000 |
| 1 | 2.266486000  | 0.252577000  | -1.640513000 |
| 6 | 2.635595000  | -1.248326000 | 0.875867000  |
| 1 | 2.705424000  | -0.221555000 | 1.260937000  |
| 6 | 1.101867000  | -2.556575000 | -0.651094000 |
| 1 | 1.964172000  | -3.196957000 | -0.441507000 |
| 6 | 1.003425000  | -2.397918000 | -2.153785000 |
| 1 | 1.939754000  | -2.010233000 | -2.563570000 |
| 1 | 0.802727000  | -3.364747000 | -2.621052000 |
| 1 | 0.186292000  | -1.720312000 | -2.431699000 |
| 6 | -0.112740000 | -3.251660000 | -0.059628000 |
| 1 | -0.048929000 | -3.308181000 | 1.028985000  |
| 1 | -1.038911000 | -2.741014000 | -0.329075000 |
| 1 | -0.172219000 | -4.269532000 | -0.450874000 |
| 5 | -1.977374000 | -0.280120000 | -1.723689000 |
| 6 | -4.242633000 | -1.447819000 | -1.109673000 |
| 1 | -5.153278000 | -1.435861000 | -0.497970000 |
| 1 | -4.542554000 | -1.495142000 | -2.157788000 |
| 1 | -3.686843000 | -2.362693000 | -0.883531000 |
| 6 | -4.151953000 | 1.051171000  | -1.212906000 |
| 1 | -4.402676000 | 1.058594000  | -2.274441000 |

|   |              |             |              |
|---|--------------|-------------|--------------|
| 1 | -5.085177000 | 1.132171000 | -0.642035000 |
| 1 | -3.545165000 | 1.940568000 | -1.010717000 |

**5-T** (TE= -1332.261627)

|    |              |              |              |
|----|--------------|--------------|--------------|
| 6  | -1.612750000 | -0.334356000 | 0.692806000  |
| 6  | -3.373926000 | -0.399995000 | -0.886275000 |
| 7  | -0.963517000 | -0.551060000 | -0.530600000 |
| 7  | -2.928748000 | -0.277129000 | 0.556294000  |
| 6  | -3.822922000 | 0.044173000  | 1.636660000  |
| 1  | -4.681678000 | -0.631952000 | 1.643026000  |
| 1  | -3.304080000 | -0.060532000 | 2.589340000  |
| 1  | -4.196599000 | 1.070314000  | 1.558628000  |
| 15 | 0.428678000  | -0.062557000 | 0.248579000  |
| 6  | -0.605827000 | -0.078244000 | 1.634619000  |
| 7  | 1.642349000  | -1.143162000 | -0.020307000 |
| 7  | 1.027384000  | 1.396142000  | -0.223031000 |
| 6  | -0.906251000 | 2.900548000  | 0.417163000  |
| 1  | -1.381934000 | 2.572757000  | -0.514461000 |
| 1  | -1.373129000 | 2.353127000  | 1.238866000  |
| 1  | -1.113032000 | 3.964185000  | 0.559616000  |
| 6  | 1.263357000  | 2.902024000  | 1.715448000  |
| 1  | 2.351096000  | 2.863602000  | 1.618346000  |
| 1  | 0.987877000  | 3.877118000  | 2.124000000  |
| 1  | 0.957494000  | 2.140927000  | 2.436504000  |
| 6  | 2.999528000  | 2.245532000  | -1.460263000 |
| 1  | 3.647019000  | 1.840278000  | -0.679207000 |
| 1  | 3.530079000  | 2.176455000  | -2.412434000 |
| 1  | 2.843425000  | 3.307650000  | -1.254663000 |
| 6  | 0.769189000  | 2.037387000  | -2.615283000 |
| 1  | -0.157661000 | 1.451934000  | -2.674844000 |
| 1  | 0.499546000  | 3.078900000  | -2.418578000 |
| 1  | 1.268275000  | 2.005749000  | -3.586796000 |
| 6  | 4.112348000  | -1.100122000 | -0.245085000 |
| 1  | 5.026928000  | -0.780746000 | 0.259115000  |
| 1  | 4.244167000  | -2.149414000 | -0.519861000 |
| 1  | 4.008707000  | -0.519270000 | -1.163490000 |
| 6  | 3.041826000  | -1.719263000 | 1.945248000  |
| 1  | 2.193475000  | -1.533815000 | 2.608913000  |
| 1  | 3.077159000  | -2.790617000 | 1.730523000  |
| 1  | 3.959276000  | -1.460387000 | 2.478139000  |
| 6  | -0.574923000 | 0.122872000  | 3.103066000  |
| 1  | -1.024014000 | 1.070446000  | 3.432145000  |
| 1  | -1.089434000 | -0.679967000 | 3.641915000  |
| 1  | 0.455970000  | 0.124978000  | 3.467619000  |
| 6  | 0.598024000  | 2.681107000  | 0.372654000  |
| 6  | 1.690929000  | 1.482734000  | -1.545868000 |

|   |              |              |              |
|---|--------------|--------------|--------------|
| 1 | 0.995988000  | 3.437870000  | -0.309050000 |
| 1 | 1.928613000  | 0.451215000  | -1.822159000 |
| 6 | 2.921369000  | -0.900153000 | 0.673211000  |
| 1 | 2.905192000  | 0.158666000  | 0.961440000  |
| 6 | 1.401201000  | -2.507246000 | -0.548159000 |
| 1 | 2.357864000  | -3.020927000 | -0.409663000 |
| 6 | 1.117780000  | -2.477404000 | -2.037404000 |
| 1 | 1.922246000  | -1.970125000 | -2.575601000 |
| 1 | 1.041241000  | -3.496290000 | -2.424136000 |
| 1 | 0.171562000  | -1.968059000 | -2.257567000 |
| 6 | 0.361221000  | -3.307718000 | 0.217007000  |
| 1 | 0.552607000  | -3.284620000 | 1.291777000  |
| 1 | -0.645589000 | -2.927263000 | 0.034468000  |
| 1 | 0.392895000  | -4.348545000 | -0.112809000 |
| 5 | -1.941050000 | -0.295843000 | -1.632474000 |
| 6 | -4.059764000 | -1.751128000 | -1.052065000 |
| 1 | -4.952379000 | -1.855144000 | -0.418764000 |
| 1 | -4.371345000 | -1.876311000 | -2.091786000 |
| 1 | -3.365052000 | -2.561004000 | -0.813559000 |
| 6 | -4.337000000 | 0.723057000  | -1.226563000 |
| 1 | -4.540252000 | 0.697192000  | -2.299338000 |
| 1 | -5.299107000 | 0.637299000  | -0.704097000 |
| 1 | -3.891064000 | 1.695523000  | -0.999831000 |

**6-S (TE= -1500.702804)**

|    |              |              |              |
|----|--------------|--------------|--------------|
| 6  | -0.743526000 | 0.187032000  | 1.055171000  |
| 7  | -0.386575000 | -0.156925000 | -0.262945000 |
| 7  | -2.064453000 | 0.342296000  | 1.146613000  |
| 6  | -2.601920000 | 1.394120000  | 1.989226000  |
| 1  | -3.636085000 | 1.184087000  | 2.258225000  |
| 1  | -2.007802000 | 1.451329000  | 2.901539000  |
| 1  | -2.560826000 | 2.356556000  | 1.468594000  |
| 15 | 1.204974000  | -0.017136000 | 0.231392000  |
| 6  | 0.432741000  | 0.321361000  | 1.765317000  |
| 7  | 2.042887000  | -1.400471000 | -0.040058000 |
| 7  | 2.066249000  | 1.193173000  | -0.457428000 |
| 6  | 0.736396000  | 3.206100000  | 0.303768000  |
| 1  | 0.060192000  | 3.018468000  | -0.533756000 |
| 1  | 0.267028000  | 2.825093000  | 1.212391000  |
| 1  | 0.849671000  | 4.286728000  | 0.414043000  |
| 6  | 3.006810000  | 2.675203000  | 1.275262000  |
| 1  | 4.015407000  | 2.335100000  | 1.030223000  |
| 1  | 3.068333000  | 3.707996000  | 1.625378000  |
| 1  | 2.633249000  | 2.066511000  | 2.101751000  |
| 6  | 3.972377000  | 1.396792000  | -2.029656000 |
| 1  | 4.607075000  | 0.885212000  | -1.302508000 |



|   |              |              |              |
|---|--------------|--------------|--------------|
| 1 | 4.311313000  | 1.120915000  | -3.030311000 |
| 1 | 4.129899000  | 2.472944000  | -1.922206000 |
| 6 | 1.605101000  | 1.728620000  | -2.838634000 |
| 1 | 0.571477000  | 1.383117000  | -2.729628000 |
| 1 | 1.632585000  | 2.812908000  | -2.698529000 |
| 1 | 1.926112000  | 1.522574000  | -3.861767000 |
| 6 | 4.391472000  | -2.002213000 | -0.568366000 |
| 1 | 5.418619000  | -1.898588000 | -0.212547000 |
| 1 | 4.217047000  | -3.065252000 | -0.750074000 |
| 1 | 4.306168000  | -1.476902000 | -1.521208000 |
| 6 | 3.531484000  | -2.168186000 | 1.790069000  |
| 1 | 2.857733000  | -1.727490000 | 2.529047000  |
| 1 | 3.276434000  | -3.226068000 | 1.688031000  |
| 1 | 4.550947000  | -2.111723000 | 2.177069000  |
| 6 | 0.762080000  | 0.598459000  | 3.183632000  |
| 1 | 0.711219000  | 1.662973000  | 3.447050000  |
| 1 | 0.085856000  | 0.066526000  | 3.858727000  |
| 1 | 1.773850000  | 0.262142000  | 3.425374000  |
| 6 | 2.099376000  | 2.578343000  | 0.066391000  |
| 6 | 2.515532000  | 1.012334000  | -1.862652000 |
| 1 | 2.568484000  | 3.154797000  | -0.735163000 |
| 1 | 2.430191000  | -0.060288000 | -2.061417000 |
| 6 | 3.432784000  | -1.439162000 | 0.463112000  |
| 1 | 3.716541000  | -0.393654000 | 0.637166000  |
| 6 | 1.415662000  | -2.701532000 | -0.388767000 |
| 1 | 2.225474000  | -3.425408000 | -0.259011000 |
| 6 | 1.003396000  | -2.733402000 | -1.845501000 |
| 1 | 1.858505000  | -2.526072000 | -2.493620000 |
| 1 | 0.614361000  | -3.721393000 | -2.101945000 |
| 1 | 0.216317000  | -2.000751000 | -2.056401000 |
| 6 | 0.296791000  | -3.135228000 | 0.541840000  |
| 1 | 0.591436000  | -3.047216000 | 1.589761000  |
| 1 | -0.612486000 | -2.553432000 | 0.382871000  |
| 1 | 0.054581000  | -4.181492000 | 0.344319000  |
| 5 | -1.515635000 | -0.051835000 | -1.219468000 |
| 7 | -2.563448000 | 0.261016000  | -0.232701000 |
| 6 | -3.937045000 | 0.012036000  | -0.344036000 |
| 6 | -4.602681000 | 0.407527000  | -1.504613000 |
| 6 | -4.661986000 | -0.626264000 | 0.659682000  |
| 6 | -5.952508000 | 0.161986000  | -1.652514000 |
| 1 | -4.028171000 | 0.892121000  | -2.284290000 |
| 6 | -6.019641000 | -0.857185000 | 0.505307000  |
| 1 | -4.150319000 | -0.968886000 | 1.551547000  |
| 6 | -6.675746000 | -0.467184000 | -0.647856000 |
| 1 | -6.450179000 | 0.473515000  | -2.564246000 |
| 1 | -6.564138000 | -1.360347000 | 1.296909000  |

1 -7.736858000 -0.651391000 -0.766371000

**6-T** (TE= -1500.635324)

6 0.762283000 -0.495113000 0.971294000  
7 0.443304000 0.187426000 -0.217371000  
7 2.049683000 -0.910481000 0.991513000  
6 2.322332000 -2.242922000 1.509759000  
1 3.390637000 -2.358870000 1.687426000  
1 1.791617000 -2.379596000 2.452176000  
1 1.990245000 -2.998423000 0.788855000  
15 -1.154402000 0.008006000 0.248462000  
6 -0.406816000 -0.663087000 1.680009000  
7 -1.905850000 1.466913000 0.184035000  
7 -2.047012000 -1.025006000 -0.653943000  
6 -1.181241000 -3.314180000 -0.046571000  
1 -0.429845000 -3.163815000 -0.827523000  
1 -0.700917000 -3.119799000 0.913786000  
1 -1.500524000 -4.359261000 -0.059975000  
6 -3.352541000 -2.433455000 0.897019000  
1 -4.280841000 -1.916399000 0.643305000  
1 -3.598765000 -3.461879000 1.169950000  
1 -2.925704000 -1.951854000 1.780772000  
6 -3.783183000 -0.690668000 -2.402588000  
1 -4.381290000 -0.099470000 -1.706980000  
1 -3.943321000 -0.294423000 -3.407329000  
1 -4.166299000 -1.714278000 -2.396436000  
6 -1.477597000 -1.463715000 -3.033807000  
1 -0.411454000 -1.399916000 -2.785901000  
1 -1.773171000 -2.516524000 -3.022098000  
1 -1.625720000 -1.093433000 -4.050553000  
6 -4.099913000 2.429069000 -0.462574000  
1 -5.174920000 2.308434000 -0.312572000  
1 -3.868251000 3.484356000 -0.302098000  
1 -3.871260000 2.184547000 -1.501828000  
6 -3.598423000 1.885433000 1.945259000  
1 -3.096784000 1.178245000 2.612157000  
1 -3.233577000 2.889048000 2.178920000  
1 -4.667887000 1.863138000 2.164958000  
6 -0.727739000 -1.128016000 3.049706000  
1 -0.931189000 -2.204098000 3.115802000  
1 0.097622000 -0.912176000 3.733117000  
1 -1.607242000 -0.612841000 3.446846000  
6 -2.382556000 -2.413121000 -0.266953000  
6 -2.304641000 -0.640949000 -2.065737000  
1 -2.916211000 -2.809978000 -1.135071000  
1 -1.976128000 0.401679000 -2.153124000

|   |              |              |              |
|---|--------------|--------------|--------------|
| 6 | -3.348758000 | 1.522883000  | 0.493846000  |
| 1 | -3.722927000 | 0.506028000  | 0.338776000  |
| 6 | -1.163821000 | 2.754902000  | 0.221363000  |
| 1 | -1.940400000 | 3.501926000  | 0.409603000  |
| 6 | -0.549113000 | 3.071937000  | -1.127713000 |
| 1 | -1.309381000 | 3.058306000  | -1.912135000 |
| 1 | -0.099470000 | 4.067222000  | -1.107899000 |
| 1 | 0.235560000  | 2.355268000  | -1.389952000 |
| 6 | -0.164187000 | 2.879147000  | 1.356841000  |
| 1 | -0.607022000 | 2.589829000  | 2.312620000  |
| 1 | 0.722574000  | 2.268597000  | 1.182816000  |
| 1 | 0.159981000  | 3.919081000  | 1.434509000  |
| 5 | 1.465437000  | -0.319197000 | -1.213377000 |
| 7 | 2.600720000  | -0.633382000 | -0.301414000 |
| 6 | 3.883294000  | -0.132095000 | -0.331610000 |
| 6 | 4.388326000  | 0.298131000  | -1.570147000 |
| 6 | 4.714113000  | -0.048447000 | 0.791436000  |
| 6 | 5.669969000  | 0.800517000  | -1.665301000 |
| 1 | 3.745480000  | 0.222640000  | -2.442027000 |
| 6 | 5.997173000  | 0.453417000  | 0.674266000  |
| 1 | 4.336333000  | -0.335378000 | 1.764986000  |
| 6 | 6.493117000  | 0.879947000  | -0.550306000 |
| 1 | 6.035203000  | 1.133110000  | -2.631346000 |
| 1 | 6.616458000  | 0.523486000  | 1.562398000  |
| 1 | 7.501255000  | 1.267398000  | -0.633653000 |

**7-S** (TE= -598.842606)

|   |              |              |              |
|---|--------------|--------------|--------------|
| 6 | -1.531063000 | 0.863603000  | 1.201690000  |
| 6 | -0.201168000 | 0.851424000  | 1.230551000  |
| 1 | -2.251515000 | 1.331126000  | 1.855256000  |
| 1 | 0.425242000  | 1.335469000  | 1.967817000  |
| 6 | -3.235111000 | -0.666332000 | 0.098900000  |
| 6 | -3.203384000 | 0.357978000  | -0.646211000 |
| 7 | -1.921152000 | 0.057976000  | 0.074170000  |
| 7 | 0.341333000  | 0.083733000  | 0.199549000  |
| 5 | -0.666931000 | -0.522649000 | -0.679424000 |
| 6 | 1.739234000  | -0.009728000 | 0.036062000  |
| 6 | 2.579154000  | 1.045384000  | 0.376212000  |
| 6 | 2.294961000  | -1.173567000 | -0.485880000 |
| 6 | 3.949160000  | 0.932382000  | 0.208503000  |
| 1 | 2.160330000  | 1.973333000  | 0.748998000  |
| 6 | 3.661949000  | -1.275099000 | -0.659750000 |
| 1 | 1.629867000  | -1.985552000 | -0.754469000 |
| 6 | 4.499349000  | -0.226592000 | -0.309762000 |
| 1 | 4.588230000  | 1.766545000  | 0.475235000  |
| 1 | 4.079086000  | -2.189429000 | -1.066540000 |

|   |              |              |              |
|---|--------------|--------------|--------------|
| 1 | 5.571182000  | -0.312098000 | -0.443504000 |
| 6 | -3.539781000 | 1.400024000  | -1.599590000 |
| 1 | -2.897119000 | 1.302528000  | -2.478341000 |
| 1 | -4.582482000 | 1.321156000  | -1.903531000 |
| 1 | -3.368350000 | 2.386188000  | -1.162354000 |
| 6 | -3.639869000 | -1.883562000 | 0.779086000  |
| 1 | -4.687004000 | -2.105560000 | 0.578901000  |
| 1 | -3.019751000 | -2.712417000 | 0.427609000  |
| 1 | -3.494907000 | -1.785504000 | 1.857143000  |

**7-T** (TE= -598.801965)

|   |              |              |              |
|---|--------------|--------------|--------------|
| 6 | -1.472279000 | 1.792047000  | -0.283827000 |
| 6 | -0.141142000 | 1.767747000  | -0.294953000 |
| 1 | -2.164263000 | 2.607140000  | -0.417438000 |
| 1 | 0.526770000  | 2.598950000  | -0.456637000 |
| 6 | -3.296580000 | 0.201750000  | 0.680846000  |
| 6 | -3.313603000 | -0.010355000 | -0.659357000 |
| 7 | -1.964866000 | 0.472485000  | -0.066052000 |
| 7 | 0.340818000  | 0.458092000  | -0.093020000 |
| 5 | -0.790425000 | -0.384068000 | 0.053788000  |
| 6 | 1.699872000  | 0.106178000  | -0.034389000 |
| 6 | 2.702934000  | 1.055554000  | 0.112810000  |
| 6 | 2.044400000  | -1.240348000 | -0.112799000 |
| 6 | 4.028607000  | 0.658684000  | 0.173118000  |
| 1 | 2.458066000  | 2.106853000  | 0.198131000  |
| 6 | 3.367304000  | -1.627081000 | -0.043262000 |
| 1 | 1.255605000  | -1.977253000 | -0.233589000 |
| 6 | 4.370351000  | -0.679435000 | 0.096582000  |
| 1 | 4.800488000  | 1.410667000  | 0.288765000  |
| 1 | 3.618090000  | -2.679590000 | -0.106047000 |
| 1 | 5.408681000  | -0.983654000 | 0.145714000  |
| 6 | -3.371622000 | -1.263202000 | -1.454072000 |
| 1 | -2.883851000 | -2.110765000 | -0.945769000 |
| 1 | -4.421940000 | -1.526596000 | -1.595831000 |
| 1 | -2.925713000 | -1.153433000 | -2.443965000 |
| 6 | -3.329430000 | -0.743882000 | 1.824818000  |
| 1 | -4.374709000 | -0.952578000 | 2.062569000  |
| 1 | -2.844385000 | -1.705911000 | 1.592556000  |
| 1 | -2.865248000 | -0.333467000 | 2.723028000  |

**8-S** (TE= -811.621275)

|   |              |              |              |
|---|--------------|--------------|--------------|
| 6 | 1.294502000  | 0.036224000  | -1.515723000 |
| 6 | -0.046943000 | 0.046000000  | -1.570969000 |
| 1 | 2.047498000  | 0.047491000  | -2.291838000 |
| 1 | -0.591400000 | 0.063958000  | -2.511860000 |
| 6 | 2.968667000  | -0.651503000 | 0.246455000  |

|    |              |              |              |
|----|--------------|--------------|--------------|
| 6  | 2.992111000  | 0.615506000  | 0.265626000  |
| 7  | 1.676687000  | 0.012873000  | -0.118263000 |
| 5  | 0.424955000  | 0.010433000  | 0.852599000  |
| 6  | 3.397210000  | 1.999650000  | 0.439776000  |
| 1  | 2.791977000  | 2.451791000  | 1.230333000  |
| 1  | 4.450568000  | 2.066233000  | 0.708942000  |
| 1  | 3.227344000  | 2.564160000  | -0.479940000 |
| 6  | 3.317861000  | -2.055423000 | 0.377801000  |
| 1  | 4.371778000  | -2.174143000 | 0.625989000  |
| 1  | 2.707185000  | -2.502516000 | 1.167029000  |
| 1  | 3.108011000  | -2.586866000 | -0.553321000 |
| 6  | -0.626910000 | 0.035825000  | -0.251363000 |
| 15 | -2.280457000 | 0.003789000  | 0.137335000  |
| 6  | -2.805848000 | -1.495513000 | 0.991368000  |
| 1  | -2.179218000 | -1.609938000 | 1.877704000  |
| 1  | -3.857547000 | -1.439314000 | 1.280635000  |
| 1  | -2.645487000 | -2.355320000 | 0.339976000  |
| 6  | -3.349316000 | 0.133857000  | -1.308302000 |
| 1  | -4.396809000 | 0.119249000  | -1.003756000 |
| 1  | -3.142624000 | 1.065639000  | -1.836415000 |
| 1  | -3.163309000 | -0.703433000 | -1.982291000 |
| 6  | -2.776370000 | 1.332969000  | 1.245244000  |
| 1  | -3.823002000 | 1.230936000  | 1.539438000  |
| 1  | -2.130892000 | 1.285568000  | 2.124019000  |
| 1  | -2.618581000 | 2.291838000  | 0.750694000  |

**8-T** (TE= -811.590734)

|    |              |              |              |
|----|--------------|--------------|--------------|
| 6  | -1.132338000 | -1.827409000 | 0.000979000  |
| 6  | 0.204201000  | -1.738520000 | 0.000648000  |
| 1  | -1.789045000 | -2.684160000 | 0.000527000  |
| 1  | 0.861939000  | -2.602056000 | -0.000827000 |
| 6  | -3.075909000 | -0.263735000 | -0.681766000 |
| 6  | -3.076663000 | -0.262117000 | 0.682675000  |
| 7  | -1.717847000 | -0.521299000 | 0.001316000  |
| 5  | -0.605982000 | 0.455662000  | 0.001983000  |
| 6  | -3.208824000 | 0.867414000  | 1.640041000  |
| 1  | -2.726008000 | 0.663654000  | 2.598160000  |
| 1  | -2.795040000 | 1.810092000  | 1.243554000  |
| 1  | -4.270925000 | 1.030891000  | 1.838001000  |
| 6  | -3.207574000 | 0.862080000  | -1.643372000 |
| 1  | -2.795170000 | 1.806619000  | -1.249960000 |
| 1  | -2.723128000 | 0.654898000  | -2.599942000 |
| 1  | -4.269487000 | 1.023850000  | -1.843708000 |
| 6  | 0.638004000  | -0.343477000 | 0.002384000  |
| 15 | 2.238490000  | 0.218877000  | 0.000469000  |
| 6  | 2.259798000  | 2.009822000  | 0.020395000  |

|   |             |              |              |
|---|-------------|--------------|--------------|
| 1 | 1.744903000 | 2.365247000  | 0.913389000  |
| 1 | 3.287767000 | 2.374577000  | 0.016317000  |
| 1 | 1.731921000 | 2.383528000  | -0.857586000 |
| 6 | 3.198127000 | -0.306080000 | -1.433076000 |
| 1 | 4.230438000 | 0.042246000  | -1.367842000 |
| 1 | 3.190272000 | -1.396455000 | -1.483936000 |
| 1 | 2.731907000 | 0.085304000  | -2.337576000 |
| 6 | 3.211813000 | -0.342743000 | 1.410699000  |
| 1 | 4.244910000 | 0.002393000  | 1.341241000  |
| 1 | 2.758167000 | 0.029699000  | 2.329476000  |
| 1 | 3.200269000 | -1.434104000 | 1.436903000  |

**9-S** (TE= -1369.118146)

|    |              |              |              |
|----|--------------|--------------|--------------|
| 6  | -1.360034000 | 0.024481000  | 1.202707000  |
| 7  | -0.959420000 | -0.111596000 | -0.197243000 |
| 15 | 0.626408000  | 0.006325000  | 0.317568000  |
| 6  | -0.109597000 | 0.120847000  | 1.858516000  |
| 7  | 1.535013000  | -1.307028000 | -0.129996000 |
| 7  | 1.482680000  | 1.290936000  | -0.271667000 |
| 6  | -0.113613000 | 3.115815000  | 0.457228000  |
| 1  | -0.695890000 | 2.941766000  | -0.450698000 |
| 1  | -0.610955000 | 2.601283000  | 1.281936000  |
| 1  | -0.123752000 | 4.187568000  | 0.669375000  |
| 6  | 2.132831000  | 2.814870000  | 1.560146000  |
| 1  | 3.177996000  | 2.545564000  | 1.390634000  |
| 1  | 2.096922000  | 3.850325000  | 1.907269000  |
| 1  | 1.741135000  | 2.181600000  | 2.358242000  |
| 6  | 3.479960000  | 1.783229000  | -1.660404000 |
| 1  | 4.111021000  | 1.313883000  | -0.901952000 |
| 1  | 3.927799000  | 1.594344000  | -2.638738000 |
| 1  | 3.502077000  | 2.864133000  | -1.499421000 |
| 6  | 1.167702000  | 1.859883000  | -2.667423000 |
| 1  | 0.173260000  | 1.401903000  | -2.647271000 |
| 1  | 1.056079000  | 2.935911000  | -2.505202000 |
| 1  | 1.589843000  | 1.721285000  | -3.665381000 |
| 6  | 3.949220000  | -1.760490000 | -0.481179000 |
| 1  | 4.927708000  | -1.714984000 | 0.001965000  |
| 1  | 3.819502000  | -2.779022000 | -0.855610000 |
| 1  | 3.960168000  | -1.083837000 | -1.337486000 |
| 6  | 2.867805000  | -2.301137000 | 1.721800000  |
| 1  | 2.093657000  | -2.008910000 | 2.434804000  |
| 1  | 2.695097000  | -3.342818000 | 1.438905000  |
| 1  | 3.836206000  | -2.255034000 | 2.224898000  |
| 6  | 0.252857000  | 0.285389000  | 3.285058000  |
| 1  | -0.039905000 | 1.261452000  | 3.697736000  |
| 1  | -0.212255000 | -0.477732000 | 3.918849000  |

|   |              |              |              |
|---|--------------|--------------|--------------|
| 1 | 1.333180000  | 0.194373000  | 3.430447000  |
| 6 | 1.324210000  | 2.652951000  | 0.288903000  |
| 6 | 2.070948000  | 1.223114000  | -1.629012000 |
| 1 | 1.771588000  | 3.310619000  | -0.461553000 |
| 1 | 2.136704000  | 0.158231000  | -1.863200000 |
| 6 | 2.863261000  | -1.385118000 | 0.510157000  |
| 1 | 3.084379000  | -0.369511000 | 0.866559000  |
| 6 | 0.975972000  | -2.565766000 | -0.667211000 |
| 1 | 1.806414000  | -3.276341000 | -0.605211000 |
| 6 | 0.619294000  | -2.418477000 | -2.132733000 |
| 1 | 1.493001000  | -2.110183000 | -2.712802000 |
| 1 | 0.263644000  | -3.371105000 | -2.533099000 |
| 1 | -0.177150000 | -1.679558000 | -2.276245000 |
| 6 | -0.161624000 | -3.163836000 | 0.146677000  |
| 1 | 0.094836000  | -3.223765000 | 1.206003000  |
| 1 | -1.081209000 | -2.583207000 | 0.049172000  |
| 1 | -0.366553000 | -4.174988000 | -0.212906000 |
| 5 | -2.008698000 | -0.100776000 | -1.176733000 |
| 6 | -2.705622000 | 0.043443000  | 1.264262000  |
| 1 | -3.395562000 | 0.157910000  | 2.084830000  |
| 6 | -4.517104000 | -0.674708000 | -0.380108000 |
| 6 | -4.502248000 | 0.595452000  | -0.447352000 |
| 7 | -3.199490000 | -0.036519000 | -0.117674000 |
| 6 | -4.925020000 | -2.069137000 | -0.387618000 |
| 1 | -6.001040000 | -2.170900000 | -0.522307000 |
| 1 | -4.407366000 | -2.593353000 | -1.196010000 |
| 1 | -4.636620000 | -2.542371000 | 0.554744000  |
| 6 | -4.879780000 | 1.990076000  | -0.603389000 |
| 1 | -4.355056000 | 2.412237000  | -1.465242000 |
| 1 | -5.953984000 | 2.100557000  | -0.745115000 |
| 1 | -4.575532000 | 2.555863000  | 0.281147000  |

**9-T** (TE= -1369.067729)

|    |              |              |              |
|----|--------------|--------------|--------------|
| 6  | 1.241946000  | -0.346294000 | 1.423133000  |
| 7  | 0.967587000  | -0.114416000 | -0.000244000 |
| 15 | -0.666837000 | -0.059973000 | 0.380358000  |
| 6  | -0.085725000 | -0.343976000 | 1.953619000  |
| 7  | -1.313587000 | 1.381917000  | -0.126365000 |
| 7  | -1.599510000 | -1.186602000 | -0.378761000 |
| 6  | -0.452787000 | -3.271398000 | 0.477548000  |
| 1  | 0.249440000  | -3.206545000 | -0.356424000 |
| 1  | 0.030734000  | -2.853412000 | 1.361768000  |
| 1  | -0.655222000 | -4.328005000 | 0.667058000  |
| 6  | -2.727543000 | -2.580137000 | 1.319655000  |
| 1  | -3.680616000 | -2.128607000 | 1.034300000  |
| 1  | -2.916602000 | -3.606513000 | 1.642175000  |

|   |              |              |              |
|---|--------------|--------------|--------------|
| 1 | -2.329422000 | -2.030684000 | 2.174913000  |
| 6 | -3.428941000 | -1.318760000 | -2.054782000 |
| 1 | -4.077657000 | -0.769907000 | -1.368359000 |
| 1 | -3.695154000 | -1.032313000 | -3.074625000 |
| 1 | -3.648226000 | -2.384276000 | -1.951660000 |
| 6 | -1.040905000 | -1.772307000 | -2.723102000 |
| 1 | 0.000919000  | -1.481627000 | -2.558690000 |
| 1 | -1.122080000 | -2.852510000 | -2.575354000 |
| 1 | -1.291609000 | -1.563821000 | -3.765411000 |
| 6 | -3.522860000 | 2.222933000  | -0.886064000 |
| 1 | -4.576773000 | 2.284319000  | -0.606479000 |
| 1 | -3.192465000 | 3.236931000  | -1.124619000 |
| 1 | -3.446798000 | 1.619034000  | -1.792224000 |
| 6 | -2.842853000 | 2.448746000  | 1.522193000  |
| 1 | -2.283160000 | 1.993487000  | 2.342525000  |
| 1 | -2.467888000 | 3.465370000  | 1.377973000  |
| 1 | -3.890108000 | 2.526434000  | 1.821804000  |
| 6 | -0.590229000 | -0.480775000 | 3.338624000  |
| 1 | -0.495066000 | -1.500353000 | 3.737582000  |
| 1 | -0.061746000 | 0.181736000  | 4.032563000  |
| 1 | -1.649941000 | -0.217099000 | 3.399428000  |
| 6 | -1.756022000 | -2.560386000 | 0.157719000  |
| 6 | -1.967618000 | -1.002677000 | -1.800939000 |
| 1 | -2.221970000 | -3.118888000 | -0.658849000 |
| 1 | -1.820881000 | 0.060738000  | -2.004768000 |
| 6 | -2.721821000 | 1.622296000  | 0.254062000  |
| 1 | -3.145715000 | 0.632173000  | 0.465688000  |
| 6 | -0.497521000 | 2.576528000  | -0.440219000 |
| 1 | -1.221335000 | 3.396833000  | -0.465774000 |
| 6 | 0.098819000  | 2.483910000  | -1.832593000 |
| 1 | -0.682887000 | 2.326072000  | -2.579479000 |
| 1 | 0.625476000  | 3.408747000  | -2.079779000 |
| 1 | 0.820073000  | 1.663998000  | -1.915904000 |
| 6 | 0.533894000  | 2.955928000  | 0.610631000  |
| 1 | 0.087423000  | 3.009220000  | 1.604968000  |
| 1 | 1.369173000  | 2.254446000  | 0.654107000  |
| 1 | 0.943345000  | 3.939456000  | 0.368775000  |
| 5 | 2.176275000  | -0.093794000 | -0.691380000 |
| 6 | 2.570279000  | -0.440838000 | 1.604352000  |
| 1 | 3.175180000  | -0.600532000 | 2.479967000  |
| 6 | 4.533652000  | 0.543062000  | 0.177039000  |
| 6 | 4.610055000  | -0.808273000 | -0.003003000 |
| 7 | 3.239906000  | -0.254751000 | 0.314154000  |
| 6 | 4.631949000  | 1.674037000  | -0.783748000 |
| 1 | 4.329744000  | 1.395939000  | -1.808267000 |
| 1 | 4.025549000  | 2.530315000  | -0.475701000 |



|   |             |              |              |
|---|-------------|--------------|--------------|
| 1 | 5.669708000 | 2.012011000  | -0.830565000 |
| 6 | 4.839648000 | -1.626658000 | -1.221126000 |
| 1 | 4.436007000 | -1.150967000 | -2.131482000 |
| 1 | 5.914865000 | -1.750642000 | -1.367896000 |
| 1 | 4.403604000 | -2.624805000 | -1.141223000 |

Cartesian coordinates of **II**, **IIIa**, **IIIb**, H<sub>2</sub>, NH<sub>3</sub>, CH<sub>4</sub> and C<sub>6</sub>H<sub>5</sub>F in their optimized state, along with their total energies (in hartrees) including zero point vibrational correction.

**II-S** (TE= -599.083898)

|   |              |              |              |
|---|--------------|--------------|--------------|
| 6 | -0.834585000 | 1.167201000  | 0.341199000  |
| 6 | -2.293293000 | 0.876531000  | 0.002692000  |
| 6 | -2.379777000 | -0.637795000 | -0.265835000 |
| 6 | -0.961484000 | -1.104996000 | -0.493753000 |
| 7 | -0.188744000 | -0.103925000 | -0.170043000 |
| 1 | -2.574729000 | 1.427875000  | -0.899825000 |
| 1 | -2.963780000 | 1.202257000  | 0.802694000  |
| 6 | 1.236861000  | -0.235451000 | -0.150921000 |
| 6 | 2.004567000  | 0.269970000  | -1.186767000 |
| 6 | 3.381242000  | 0.125557000  | -1.154641000 |
| 6 | 3.989454000  | -0.520136000 | -0.091000000 |
| 6 | 3.217058000  | -1.032677000 | 0.938670000  |
| 6 | 1.840981000  | -0.891886000 | 0.909035000  |
| 1 | 1.517347000  | 0.756237000  | -2.023832000 |
| 1 | 3.980518000  | 0.513092000  | -1.970098000 |
| 1 | 5.066926000  | -0.633039000 | -0.069312000 |
| 1 | 3.687244000  | -1.551120000 | 1.765941000  |
| 1 | 1.216659000  | -1.302416000 | 1.695532000  |
| 6 | -3.240019000 | -0.950948000 | -1.478000000 |
| 1 | -3.270742000 | -2.027135000 | -1.660692000 |
| 1 | -4.263354000 | -0.594879000 | -1.322982000 |
| 1 | -2.844966000 | -0.467494000 | -2.375411000 |
| 6 | -2.908332000 | -1.409082000 | 0.941289000  |
| 1 | -3.937926000 | -1.107012000 | 1.154801000  |
| 1 | -2.894467000 | -2.483104000 | 0.744868000  |
| 1 | -2.309401000 | -1.226873000 | 1.837423000  |
| 6 | -0.308045000 | 2.388649000  | -0.383421000 |
| 1 | 0.745924000  | 2.572122000  | -0.162935000 |
| 1 | -0.428939000 | 2.287613000  | -1.464517000 |
| 1 | -0.873016000 | 3.266981000  | -0.061554000 |
| 6 | -0.576639000 | 1.299441000  | 1.831927000  |
| 1 | -1.076535000 | 2.192862000  | 2.213271000  |
| 1 | -0.954721000 | 0.435964000  | 2.383126000  |
| 1 | 0.491234000  | 1.399276000  | 2.040949000  |

**II-T (TE= -599.015824)**

|   |              |              |              |
|---|--------------|--------------|--------------|
| 6 | -0.889815000 | 1.254200000  | -0.065375000 |
| 6 | -2.334901000 | 0.735235000  | -0.244249000 |
| 6 | -2.353149000 | -0.791062000 | -0.002604000 |
| 6 | -0.940599000 | -1.055786000 | -0.364985000 |
| 7 | -0.091672000 | -0.003278000 | -0.177627000 |
| 1 | -2.655979000 | 0.920864000  | -1.272819000 |
| 1 | -3.025738000 | 1.263219000  | 0.420341000  |
| 6 | 1.276693000  | -0.161782000 | -0.091089000 |
| 6 | 2.183872000  | 0.895215000  | 0.056380000  |
| 6 | 3.541055000  | 0.646346000  | 0.136863000  |
| 6 | 4.043456000  | -0.643607000 | 0.070004000  |
| 6 | 3.151588000  | -1.694932000 | -0.084411000 |
| 6 | 1.794864000  | -1.465213000 | -0.168374000 |
| 1 | 1.840759000  | 1.917889000  | 0.112507000  |
| 1 | 4.218002000  | 1.485388000  | 0.254064000  |
| 1 | 5.109118000  | -0.825918000 | 0.131881000  |
| 1 | 3.518419000  | -2.713723000 | -0.144697000 |
| 1 | 1.104084000  | -2.292831000 | -0.297395000 |
| 6 | -3.354403000 | -1.484997000 | -0.908256000 |
| 1 | -3.318862000 | -2.567704000 | -0.767687000 |
| 1 | -4.370828000 | -1.151048000 | -0.680239000 |
| 1 | -3.145075000 | -1.269946000 | -1.958207000 |
| 6 | -2.655033000 | -1.143197000 | 1.454566000  |
| 1 | -3.658256000 | -0.803020000 | 1.731537000  |
| 1 | -2.610864000 | -2.224784000 | 1.599565000  |
| 1 | -1.937139000 | -0.686889000 | 2.138196000  |
| 6 | -0.567096000 | 2.231511000  | -1.183137000 |
| 1 | 0.412728000  | 2.696507000  | -1.077798000 |
| 1 | -0.606415000 | 1.723817000  | -2.149480000 |
| 1 | -1.314215000 | 3.029736000  | -1.187122000 |
| 6 | -0.710726000 | 1.897116000  | 1.301388000  |
| 1 | -1.355545000 | 2.776960000  | 1.368432000  |
| 1 | -0.991840000 | 1.210761000  | 2.101310000  |
| 1 | 0.314511000  | 2.219375000  | 1.480675000  |

**IIIa-S (TE= -1009.409742)**

|    |             |              |              |
|----|-------------|--------------|--------------|
| 13 | 0.000000000 | 0.000000000  | 1.110506000  |
| 7  | 0.000000000 | 1.386940000  | -0.292988000 |
| 7  | 0.000000000 | -1.386940000 | -0.292988000 |
| 6  | 0.000000000 | 1.245033000  | -1.614298000 |
| 6  | 0.000000000 | -1.245033000 | -1.614298000 |
| 6  | 0.000000000 | 0.000000000  | -2.238800000 |
| 1  | 0.000000000 | 0.000000000  | -3.320264000 |

|   |              |              |              |
|---|--------------|--------------|--------------|
| 6 | 0.000000000  | 2.702141000  | 0.255590000  |
| 6 | 1.199517000  | 3.330234000  | 0.562679000  |
| 6 | -1.199517000 | 3.330234000  | 0.562679000  |
| 6 | 1.197849000  | 4.585900000  | 1.145554000  |
| 6 | -1.197849000 | 4.585900000  | 1.145554000  |
| 6 | 0.000000000  | 5.218642000  | 1.434713000  |
| 1 | 2.138872000  | 5.069007000  | 1.381637000  |
| 1 | -2.138872000 | 5.069007000  | 1.381637000  |
| 1 | 0.000000000  | 6.199265000  | 1.895485000  |
| 6 | 0.000000000  | -2.702141000 | 0.255590000  |
| 6 | -1.199517000 | -3.330234000 | 0.562679000  |
| 6 | 1.199517000  | -3.330234000 | 0.562679000  |
| 6 | -1.197849000 | -4.585900000 | 1.145554000  |
| 6 | 1.197849000  | -4.585900000 | 1.145554000  |
| 6 | 0.000000000  | -5.218642000 | 1.434713000  |
| 1 | -2.138872000 | -5.069007000 | 1.381637000  |
| 1 | 2.138872000  | -5.069007000 | 1.381637000  |
| 1 | 0.000000000  | -6.199265000 | 1.895485000  |
| 6 | 0.000000000  | -2.456392000 | -2.492692000 |
| 1 | 0.000000000  | -2.178613000 | -3.544638000 |
| 1 | 0.875113000  | -3.078819000 | -2.293080000 |
| 1 | -0.875113000 | -3.078819000 | -2.293080000 |
| 6 | 0.000000000  | 2.456392000  | -2.492692000 |
| 1 | 0.000000000  | 2.178613000  | -3.544638000 |
| 1 | -0.875113000 | 3.078819000  | -2.293080000 |
| 1 | 0.875113000  | 3.078819000  | -2.293080000 |
| 1 | 2.131074000  | -2.819532000 | 0.341262000  |
| 1 | -2.131074000 | -2.819532000 | 0.341262000  |
| 1 | -2.131074000 | 2.819532000  | 0.341262000  |
| 1 | 2.131074000  | 2.819532000  | 0.341262000  |

**IIIa-T (TE= -1009.355372)**

|    |              |              |              |
|----|--------------|--------------|--------------|
| 13 | 0.916948000  | -0.000011000 | 0.433110000  |
| 7  | 0.323817000  | 1.437161000  | -0.492460000 |
| 7  | 0.323807000  | -1.437176000 | -0.492468000 |
| 6  | -0.183808000 | 1.266332000  | -1.790231000 |
| 6  | -0.183810000 | -1.266336000 | -1.790243000 |
| 6  | -0.374284000 | 0.000001000  | -2.329309000 |
| 1  | -0.679812000 | 0.000006000  | -3.370593000 |
| 6  | 0.219174000  | 2.659410000  | 0.191383000  |
| 6  | 1.307705000  | 3.127396000  | 0.929984000  |
| 6  | -0.970609000 | 3.390602000  | 0.231127000  |
| 6  | 1.210059000  | 4.282641000  | 1.686239000  |
| 6  | -1.054476000 | 4.553958000  | 0.971447000  |
| 6  | 0.031920000  | 5.009035000  | 1.704996000  |
| 1  | 2.070145000  | 4.624969000  | 2.250354000  |

|   |              |              |              |
|---|--------------|--------------|--------------|
| 1 | -1.988848000 | 5.103756000  | 0.991309000  |
| 1 | -0.042175000 | 5.920194000  | 2.286083000  |
| 6 | 0.219166000  | -2.659425000 | 0.191377000  |
| 6 | -0.970631000 | -3.390592000 | 0.231183000  |
| 6 | 1.307716000  | -3.127424000 | 0.929941000  |
| 6 | -1.054489000 | -4.553940000 | 0.971515000  |
| 6 | 1.210081000  | -4.282662000 | 1.686207000  |
| 6 | 0.031930000  | -5.009036000 | 1.705018000  |
| 1 | -1.988872000 | -5.103718000 | 0.991424000  |
| 1 | 2.070185000  | -4.625002000 | 2.250290000  |
| 1 | -0.042157000 | -5.920188000 | 2.286115000  |
| 6 | -0.338754000 | -2.472733000 | -2.655775000 |
| 1 | -0.420707000 | -2.172761000 | -3.700497000 |
| 1 | 0.526525000  | -3.137359000 | -2.557158000 |
| 1 | -1.218497000 | -3.079925000 | -2.421149000 |
| 6 | -0.338778000 | 2.472746000  | -2.655734000 |
| 1 | -0.420755000 | 2.172798000  | -3.700461000 |
| 1 | -1.218520000 | 3.079927000  | -2.421070000 |
| 1 | 0.526499000  | 3.137375000  | -2.557121000 |
| 1 | 2.247349000  | -2.584419000 | 0.878519000  |
| 1 | -1.839360000 | -3.016878000 | -0.298173000 |
| 1 | -1.839318000 | 3.016905000  | -0.298275000 |
| 1 | 2.247330000  | 2.584374000  | 0.878603000  |

**IIIb-S (TE= -2691.803645)**

|   |              |              |              |
|---|--------------|--------------|--------------|
| 7 | -0.020994000 | 1.429672000  | -0.441933000 |
| 7 | -0.020994000 | -1.429672000 | -0.441933000 |
| 6 | 0.044433000  | 1.254883000  | -1.752143000 |
| 6 | 0.044433000  | -1.254883000 | -1.752143000 |
| 6 | 0.067408000  | 0.000000000  | -2.362804000 |
| 1 | 0.106832000  | 0.000000000  | -3.443925000 |
| 6 | -0.018067000 | 2.737817000  | 0.098698000  |
| 6 | 1.177908000  | 3.413711000  | 0.315229000  |
| 6 | -1.210659000 | 3.321956000  | 0.510161000  |
| 6 | 1.176348000  | 4.664666000  | 0.906844000  |
| 6 | -1.208411000 | 4.573539000  | 1.102666000  |
| 6 | -0.016535000 | 5.250881000  | 1.299244000  |
| 1 | 2.114924000  | 5.182185000  | 1.069093000  |
| 1 | -2.145148000 | 5.019569000  | 1.416584000  |
| 1 | -0.015529000 | 6.228548000  | 1.766233000  |
| 6 | -0.018067000 | -2.737817000 | 0.098698000  |
| 6 | -1.210659000 | -3.321956000 | 0.510161000  |
| 6 | 1.177908000  | -3.413711000 | 0.315229000  |
| 6 | -1.208411000 | -4.573539000 | 1.102666000  |
| 6 | 1.176348000  | -4.664666000 | 0.906844000  |
| 6 | -0.016535000 | -5.250881000 | 1.299244000  |

|    |              |              |              |
|----|--------------|--------------|--------------|
| 1  | -2.145148000 | -5.019569000 | 1.416584000  |
| 1  | 2.114924000  | -5.182185000 | 1.069093000  |
| 1  | -0.015529000 | -6.228548000 | 1.766234000  |
| 6  | 0.083324000  | -2.451203000 | -2.655930000 |
| 1  | 0.045512000  | -2.156002000 | -3.702582000 |
| 1  | 0.993611000  | -3.032075000 | -2.492295000 |
| 1  | -0.754584000 | -3.120021000 | -2.446366000 |
| 6  | 0.083324000  | 2.451203000  | -2.655930000 |
| 1  | 0.045512000  | 2.156002000  | -3.702582000 |
| 1  | -0.754584000 | 3.120021000  | -2.446366000 |
| 1  | 0.993611000  | 3.032075000  | -2.492295000 |
| 1  | 2.107942000  | -2.941409000 | 0.015342000  |
| 1  | -2.138371000 | -2.780381000 | 0.356053000  |
| 1  | -2.138371000 | 2.780381000  | 0.356053000  |
| 1  | 2.107942000  | 2.941409000  | 0.015342000  |
| 31 | -0.124814000 | 0.000000000  | 1.090861000  |

**IIIb-T** (TE= -2691.716936)

|   |              |              |              |
|---|--------------|--------------|--------------|
| 7 | -0.326046000 | 1.436277000  | -0.654512000 |
| 7 | -0.326047000 | -1.436275000 | -0.654512000 |
| 6 | 0.189898000  | 1.272769000  | -1.934278000 |
| 6 | 0.189902000  | -1.272768000 | -1.934275000 |
| 6 | 0.393121000  | 0.000000000  | -2.464834000 |
| 1 | 0.731919000  | 0.000000000  | -3.496254000 |
| 6 | -0.243689000 | 2.642245000  | 0.036908000  |
| 6 | 0.957737000  | 3.358822000  | 0.099162000  |
| 6 | -1.335894000 | 3.124705000  | 0.763878000  |
| 6 | 1.050888000  | 4.509020000  | 0.856279000  |
| 6 | -1.228512000 | 4.271647000  | 1.529964000  |
| 6 | -0.038625000 | 4.977154000  | 1.577556000  |
| 1 | 1.995757000  | 5.039426000  | 0.897859000  |
| 1 | -2.092876000 | 4.624603000  | 2.080980000  |
| 1 | 0.041695000  | 5.881203000  | 2.168668000  |
| 6 | -0.243693000 | -2.642243000 | 0.036907000  |
| 6 | -1.335897000 | -3.124702000 | 0.763880000  |
| 6 | 0.957731000  | -3.358825000 | 0.099156000  |
| 6 | -1.228516000 | -4.271645000 | 1.529965000  |
| 6 | 1.050881000  | -4.509023000 | 0.856271000  |
| 6 | -0.038630000 | -4.977155000 | 1.577552000  |
| 1 | -2.092879000 | -4.624599000 | 2.080983000  |
| 1 | 1.995749000  | -5.039432000 | 0.897848000  |
| 1 | 0.041688000  | -5.881204000 | 2.168663000  |
| 6 | 0.386336000  | -2.472902000 | -2.803991000 |
| 1 | 0.447351000  | -2.172033000 | -3.850085000 |
| 1 | 1.293348000  | -3.041507000 | -2.577051000 |
| 1 | -0.449165000 | -3.172392000 | -2.697132000 |

|    |              |              |              |
|----|--------------|--------------|--------------|
| 6  | 0.386316000  | 2.472902000  | -2.803999000 |
| 1  | 0.447342000  | 2.172029000  | -3.850092000 |
| 1  | -0.449198000 | 3.172378000  | -2.697148000 |
| 1  | 1.293317000  | 3.041524000  | -2.577057000 |
| 1  | 1.828672000  | -2.974902000 | -0.418562000 |
| 1  | -2.285731000 | -2.603332000 | 0.693454000  |
| 1  | -2.285728000 | 2.603337000  | 0.693449000  |
| 1  | 1.828679000  | 2.974897000  | -0.418552000 |
| 31 | -1.404788000 | 0.000001000  | 0.059146000  |

H<sub>2</sub> (TE= -1.160836)

|   |             |             |              |
|---|-------------|-------------|--------------|
| 1 | 0.000000000 | 0.000000000 | 0.373457000  |
| 1 | 0.000000000 | 0.000000000 | -0.373457000 |

NH<sub>3</sub> (TE= -56.509166)

|   |              |              |              |
|---|--------------|--------------|--------------|
| 7 | 0.000000000  | 0.000000000  | 0.114416000  |
| 1 | 0.000000000  | 0.938276000  | -0.266971000 |
| 1 | -0.812571000 | -0.469138000 | -0.266971000 |
| 1 | 0.812571000  | -0.469138000 | -0.266971000 |

CH<sub>4</sub> (TE= -40.448443)

|   |              |              |              |
|---|--------------|--------------|--------------|
| 6 | 0.000000000  | 0.000000000  | 0.000000000  |
| 1 | 0.628315000  | 0.628315000  | 0.628315000  |
| 1 | -0.628315000 | -0.628315000 | 0.628315000  |
| 1 | -0.628315000 | 0.628315000  | -0.628315000 |
| 1 | 0.628315000  | -0.628315000 | -0.628315000 |

C<sub>6</sub>H<sub>5</sub>F (TE= -331.304540)

|   |              |              |              |
|---|--------------|--------------|--------------|
| 6 | -1.125631000 | -1.198877000 | 0.000002000  |
| 6 | 0.259400000  | -1.208049000 | -0.000003000 |
| 6 | 0.925405000  | -0.000023000 | -0.000007000 |
| 6 | 0.259399000  | 1.208038000  | -0.000002000 |
| 6 | -1.125598000 | 1.198903000  | -0.000001000 |
| 6 | -1.820232000 | 0.000003000  | 0.000002000  |
| 1 | -1.664248000 | -2.139173000 | 0.000008000  |
| 1 | 0.825356000  | -2.131391000 | -0.000007000 |
| 1 | 0.825436000  | 2.131333000  | -0.000001000 |
| 1 | -1.664245000 | 2.139181000  | 0.000007000  |
| 1 | -2.903359000 | 0.000035000  | 0.000004000  |
| 9 | 2.260512000  | 0.000005000  | 0.000006000  |

Cartesian coordinates of the transition states involved in the activation of hydrogen by **4-7**, **9**, **II**, **IIIa** and **IIIb**, along with their total energies (in hartrees) including zero point vibrational correction.

**4TS<sup>H-H</sup>** (TE= -1714.647074)

|    |              |              |              |
|----|--------------|--------------|--------------|
| 6  | -0.824802000 | -0.584687000 | 1.020779000  |
| 6  | -2.690115000 | -0.747905000 | -0.281247000 |
| 7  | -0.435128000 | -0.362348000 | -0.311966000 |
| 7  | -2.125530000 | -0.801579000 | 1.080084000  |
| 6  | -2.824703000 | -1.226108000 | 2.260587000  |
| 1  | -3.301777000 | -2.196581000 | 2.089784000  |
| 1  | -2.129481000 | -1.318318000 | 3.094991000  |
| 1  | -3.601382000 | -0.508820000 | 2.547138000  |
| 15 | -4.209474000 | -0.018582000 | -0.529924000 |
| 6  | -4.386658000 | 1.671970000  | 0.103014000  |
| 1  | -5.388003000 | 2.069548000  | -0.075286000 |
| 1  | -4.180673000 | 1.687140000  | 1.175291000  |
| 1  | -3.644415000 | 2.288352000  | -0.413728000 |
| 6  | -5.630076000 | -0.886302000 | 0.186329000  |
| 1  | -6.557814000 | -0.377733000 | -0.083862000 |
| 1  | -5.650301000 | -1.909523000 | -0.190047000 |
| 1  | -5.552060000 | -0.914175000 | 1.274082000  |
| 6  | -4.517242000 | 0.096386000  | -2.287632000 |
| 1  | -5.535183000 | 0.457864000  | -2.447871000 |
| 1  | -3.799776000 | 0.808830000  | -2.709474000 |
| 1  | -4.389611000 | -0.880746000 | -2.750497000 |
| 15 | 1.101793000  | -0.082186000 | 0.274344000  |
| 6  | 0.335435000  | -0.435472000 | 1.790555000  |
| 7  | 2.216538000  | -1.108586000 | -0.371997000 |
| 7  | 1.704463000  | 1.428851000  | 0.034616000  |
| 6  | -0.294820000 | 2.741116000  | 0.866266000  |
| 1  | -0.751289000 | 2.641489000  | -0.123838000 |
| 1  | -0.742979000 | 1.997610000  | 1.530108000  |
| 1  | -0.544707000 | 3.729657000  | 1.258849000  |
| 6  | 1.862102000  | 2.654306000  | 2.175755000  |
| 1  | 2.949988000  | 2.592469000  | 2.092890000  |
| 1  | 1.607865000  | 3.591295000  | 2.676728000  |
| 1  | 1.517714000  | 1.834989000  | 2.808852000  |
| 6  | 3.607222000  | 2.568616000  | -1.065486000 |
| 1  | 4.274091000  | 2.099140000  | -0.337878000 |
| 1  | 4.142153000  | 2.653857000  | -2.013967000 |
| 1  | 3.392521000  | 3.584623000  | -0.724842000 |
| 6  | 1.378767000  | 2.375117000  | -2.242438000 |
| 1  | 0.500236000  | 1.741702000  | -2.396896000 |
| 1  | 1.026621000  | 3.352283000  | -1.900799000 |

|   |              |              |              |
|---|--------------|--------------|--------------|
| 1 | 1.870515000  | 2.523259000  | -3.206659000 |
| 6 | 4.681900000  | -1.067975000 | -0.660190000 |
| 1 | 5.624213000  | -0.984303000 | -0.114781000 |
| 1 | 4.739486000  | -1.972975000 | -1.269793000 |
| 1 | 4.600695000  | -0.211451000 | -1.331758000 |
| 6 | 3.649053000  | -2.291178000 | 1.278002000  |
| 1 | 2.818513000  | -2.303379000 | 1.987688000  |
| 1 | 3.658863000  | -3.246322000 | 0.746488000  |
| 1 | 4.582646000  | -2.218744000 | 1.840030000  |
| 6 | 0.658458000  | -0.560401000 | 3.232497000  |
| 1 | 0.468556000  | -1.564822000 | 3.628102000  |
| 1 | 1.719209000  | -0.359725000 | 3.404671000  |
| 1 | 0.100823000  | 0.145160000  | 3.862718000  |
| 6 | 1.216807000  | 2.598414000  | 0.806567000  |
| 6 | 2.349267000  | 1.745623000  | -1.263100000 |
| 1 | 1.584041000  | 3.461153000  | 0.244712000  |
| 1 | 2.653002000  | 0.782518000  | -1.678166000 |
| 6 | 3.522726000  | -1.122781000 | 0.317390000  |
| 1 | 3.555988000  | -0.198651000 | 0.912352000  |
| 6 | 1.890520000  | -2.253845000 | -1.250340000 |
| 1 | 2.834778000  | -2.801325000 | -1.334318000 |
| 6 | 1.513024000  | -1.780902000 | -2.639272000 |
| 1 | 2.312872000  | -1.175322000 | -3.073411000 |
| 1 | 1.339943000  | -2.637534000 | -3.294739000 |
| 1 | 0.590353000  | -1.188791000 | -2.621028000 |
| 6 | 0.870636000  | -3.223947000 | -0.676008000 |
| 1 | 1.118355000  | -3.499319000 | 0.351062000  |
| 1 | -0.137683000 | -2.806357000 | -0.691195000 |
| 1 | 0.859949000  | -4.134526000 | -1.279315000 |
| 5 | -1.581241000 | -0.331602000 | -1.260601000 |
| 1 | -1.753039000 | 0.910057000  | -2.128912000 |
| 1 | -1.989828000 | 1.911336000  | -2.244105000 |

**5TS<sup>H-H</sup>** (TE= -1333.460884)

|    |              |              |              |
|----|--------------|--------------|--------------|
| 6  | -1.654180000 | 0.047067000  | 0.703338000  |
| 6  | -3.415969000 | -0.165240000 | -0.825040000 |
| 7  | -1.050919000 | -0.194010000 | -0.553607000 |
| 7  | -2.966360000 | 0.107705000  | 0.598601000  |
| 6  | -3.859135000 | 0.305735000  | 1.708551000  |
| 1  | -4.462547000 | -0.586161000 | 1.903600000  |
| 1  | -3.287015000 | 0.534306000  | 2.607862000  |
| 1  | -4.537094000 | 1.140691000  | 1.515646000  |
| 15 | 0.415469000  | -0.007888000 | 0.210033000  |
| 6  | -0.607644000 | 0.172002000  | 1.607700000  |
| 7  | 1.403262000  | -1.310146000 | 0.002842000  |
| 7  | 1.320430000  | 1.289705000  | -0.240199000 |



|   |              |              |              |
|---|--------------|--------------|--------------|
| 6 | -0.251843000 | 3.168895000  | 0.407632000  |
| 1 | -0.771308000 | 3.015435000  | -0.543338000 |
| 1 | -0.841217000 | 2.686826000  | 1.189590000  |
| 1 | -0.226551000 | 4.240911000  | 0.616947000  |
| 6 | 1.863736000  | 2.710589000  | 1.702391000  |
| 1 | 2.919126000  | 2.443902000  | 1.612490000  |
| 1 | 1.799634000  | 3.721943000  | 2.110363000  |
| 1 | 1.401096000  | 2.032869000  | 2.423275000  |
| 6 | 3.456241000  | 1.744518000  | -1.423928000 |
| 1 | 3.994617000  | 1.259248000  | -0.606774000 |
| 1 | 3.994431000  | 1.540833000  | -2.352060000 |
| 1 | 3.491914000  | 2.824735000  | -1.262296000 |
| 6 | 1.256477000  | 1.908021000  | -2.644893000 |
| 1 | 0.277528000  | 1.439227000  | -2.775888000 |
| 1 | 1.110344000  | 2.972400000  | -2.441592000 |
| 1 | 1.800825000  | 1.824934000  | -3.588086000 |
| 6 | 3.847867000  | -1.713773000 | -0.140939000 |
| 1 | 4.788039000  | -1.569292000 | 0.395596000  |
| 1 | 3.791493000  | -2.769486000 | -0.416794000 |
| 1 | 3.885948000  | -1.125329000 | -1.059432000 |
| 6 | 2.617214000  | -2.113839000 | 2.014653000  |
| 1 | 1.792829000  | -1.780764000 | 2.649980000  |
| 1 | 2.475107000  | -3.176976000 | 1.804091000  |
| 1 | 3.547592000  | -2.012246000 | 2.577445000  |
| 6 | -0.508917000 | 0.361856000  | 3.075900000  |
| 1 | -0.751218000 | 1.380898000  | 3.405138000  |
| 1 | -1.168250000 | -0.319225000 | 3.622071000  |
| 1 | 0.505668000  | 0.153720000  | 3.426341000  |
| 6 | 1.169726000  | 2.636766000  | 0.357164000  |
| 6 | 2.035578000  | 1.225605000  | -1.537863000 |
| 1 | 1.717106000  | 3.294363000  | -0.323362000 |
| 1 | 2.094454000  | 0.162056000  | -1.786920000 |
| 6 | 2.684353000  | -1.295082000 | 0.738396000  |
| 1 | 2.851111000  | -0.249553000 | 1.025003000  |
| 6 | 0.940353000  | -2.620727000 | -0.510419000 |
| 1 | 1.784654000  | -3.292825000 | -0.328634000 |
| 6 | 0.712939000  | -2.568549000 | -2.006828000 |
| 1 | 1.621626000  | -2.250511000 | -2.524434000 |
| 1 | 0.438649000  | -3.558019000 | -2.380156000 |
| 1 | -0.097472000 | -1.877011000 | -2.266394000 |
| 6 | -0.246753000 | -3.201883000 | 0.236238000  |
| 1 | -0.083045000 | -3.194428000 | 1.315608000  |
| 1 | -1.161668000 | -2.648106000 | 0.021082000  |
| 1 | -0.402562000 | -4.235798000 | -0.079044000 |
| 5 | -2.027648000 | -0.120030000 | -1.682815000 |
| 6 | -4.001763000 | -1.571650000 | -0.865820000 |

|   |              |              |              |
|---|--------------|--------------|--------------|
| 1 | -4.833361000 | -1.687083000 | -0.160034000 |
| 1 | -4.379527000 | -1.780819000 | -1.868499000 |
| 1 | -3.247140000 | -2.328125000 | -0.633904000 |
| 6 | -4.480496000 | 0.835310000  | -1.227646000 |
| 1 | -4.647708000 | 0.757019000  | -2.304396000 |
| 1 | -5.438962000 | 0.642671000  | -0.731224000 |
| 1 | -4.173126000 | 1.859640000  | -1.008471000 |
| 1 | -2.040731000 | 1.731841000  | -1.906165000 |
| 1 | -1.918676000 | 1.053259000  | -2.475629000 |

**6TS<sup>H-H</sup>** (TE= -1501.845351)

|    |              |              |              |
|----|--------------|--------------|--------------|
| 6  | 0.711428000  | -0.296516000 | 1.069384000  |
| 7  | 0.377747000  | 0.111004000  | -0.232832000 |
| 7  | 2.023294000  | -0.520562000 | 1.167451000  |
| 6  | 2.530063000  | -1.547152000 | 2.053681000  |
| 1  | 3.575447000  | -1.358025000 | 2.295400000  |
| 1  | 1.950619000  | -1.532643000 | 2.976194000  |
| 1  | 2.448244000  | -2.532440000 | 1.583453000  |
| 15 | -1.221913000 | 0.004714000  | 0.241126000  |
| 6  | -0.475876000 | -0.418731000 | 1.765040000  |
| 7  | -2.008926000 | 1.421727000  | 0.016742000  |
| 7  | -2.119307000 | -1.150176000 | -0.497760000 |
| 6  | -0.760033000 | -3.201307000 | 0.103431000  |
| 1  | -0.091876000 | -2.940566000 | -0.720895000 |
| 1  | -0.286822000 | -2.892995000 | 1.037411000  |
| 1  | -0.863466000 | -4.288176000 | 0.126199000  |
| 6  | -3.021900000 | -2.762873000 | 1.137707000  |
| 1  | -4.032485000 | -2.401038000 | 0.936318000  |
| 1  | -3.082071000 | -3.820819000 | 1.402591000  |
| 1  | -2.634379000 | -2.225318000 | 2.005445000  |
| 6  | -4.069443000 | -1.288731000 | -2.026561000 |
| 1  | -4.694962000 | -0.846102000 | -1.248123000 |
| 1  | -4.441634000 | -0.948294000 | -2.995047000 |
| 1  | -4.201550000 | -2.373010000 | -1.994518000 |
| 6  | -1.721613000 | -1.498855000 | -2.924795000 |
| 1  | -0.691041000 | -1.144233000 | -2.820668000 |
| 1  | -1.719903000 | -2.590874000 | -2.866691000 |
| 1  | -2.076694000 | -1.224916000 | -3.920363000 |
| 6  | -4.364608000 | 2.080847000  | -0.391276000 |
| 1  | -5.370733000 | 2.036766000  | 0.030554000  |
| 1  | -4.152593000 | 3.128620000  | -0.616609000 |
| 1  | -4.364133000 | 1.525035000  | -1.330489000 |
| 6  | -3.374697000 | 2.256557000  | 1.914116000  |
| 1  | -2.666387000 | 1.816036000  | 2.619824000  |
| 1  | -3.110072000 | 3.308223000  | 1.779245000  |
| 1  | -4.371023000 | 2.222843000  | 2.359519000  |

|   |              |              |              |
|---|--------------|--------------|--------------|
| 6 | -0.834985000 | -0.756367000 | 3.163066000  |
| 1 | -0.755840000 | -1.827368000 | 3.389779000  |
| 1 | -0.201683000 | -0.225736000 | 3.879470000  |
| 1 | -1.864933000 | -0.462666000 | 3.381017000  |
| 6 | -2.131127000 | -2.570536000 | -0.071867000 |
| 6 | -2.618111000 | -0.879901000 | -1.871254000 |
| 1 | -2.603917000 | -3.094164000 | -0.906474000 |
| 1 | -2.568204000 | 0.205637000  | -1.991717000 |
| 6 | -3.367173000 | 1.505838000  | 0.595595000  |
| 1 | -3.669771000 | 0.470241000  | 0.802816000  |
| 6 | -1.336154000 | 2.695266000  | -0.349007000 |
| 1 | -2.123619000 | 3.447698000  | -0.243198000 |
| 6 | -0.918013000 | 2.679149000  | -1.805139000 |
| 1 | -1.787932000 | 2.544407000  | -2.453136000 |
| 1 | -0.434826000 | 3.621819000  | -2.068966000 |
| 1 | -0.201709000 | 1.878849000  | -2.010886000 |
| 6 | -0.212370000 | 3.099218000  | 0.588076000  |
| 1 | -0.524826000 | 3.030275000  | 1.632403000  |
| 1 | 0.684056000  | 2.493517000  | 0.437866000  |
| 1 | 0.069239000  | 4.134359000  | 0.383886000  |
| 5 | 1.546799000  | 0.023099000  | -1.130909000 |
| 7 | 2.554285000  | -0.497599000 | -0.178959000 |
| 6 | 3.906198000  | -0.151257000 | -0.285368000 |
| 6 | 4.585622000  | -0.508518000 | -1.447161000 |
| 6 | 4.572206000  | 0.578541000  | 0.694356000  |
| 6 | 5.905213000  | -0.140649000 | -1.620823000 |
| 1 | 4.052080000  | -1.067284000 | -2.207439000 |
| 6 | 5.903159000  | 0.921928000  | 0.520094000  |
| 1 | 4.034897000  | 0.896757000  | 1.580155000  |
| 6 | 6.577309000  | 0.567941000  | -0.634662000 |
| 1 | 6.419484000  | -0.420674000 | -2.533353000 |
| 1 | 6.409491000  | 1.490883000  | 1.291951000  |
| 1 | 7.615936000  | 0.845149000  | -0.770235000 |
| 1 | 1.955545000  | 1.133460000  | -1.802994000 |
| 1 | 2.268522000  | 2.066450000  | -1.374338000 |

**7TS<sup>H-H</sup>** (TE= -599.985495)

|   |              |              |              |
|---|--------------|--------------|--------------|
| 6 | -1.524979000 | -0.994735000 | 1.115611000  |
| 6 | -0.189746000 | -1.038476000 | 1.109224000  |
| 1 | -2.248170000 | -1.555421000 | 1.687161000  |
| 1 | 0.412935000  | -1.680091000 | 1.737150000  |
| 6 | -3.131570000 | -0.357061000 | -0.744076000 |
| 6 | -3.292061000 | 0.546982000  | 0.136441000  |
| 7 | -1.938920000 | -0.044639000 | 0.108423000  |
| 7 | 0.383512000  | -0.159643000 | 0.214076000  |
| 5 | -0.666728000 | 0.664770000  | -0.461246000 |

|   |              |              |              |
|---|--------------|--------------|--------------|
| 6 | 1.763068000  | -0.038376000 | 0.053477000  |
| 6 | 2.653473000  | -1.036972000 | 0.447706000  |
| 6 | 2.277408000  | 1.124776000  | -0.520302000 |
| 6 | 4.015946000  | -0.868384000 | 0.279368000  |
| 1 | 2.284338000  | -1.965109000 | 0.867697000  |
| 6 | 3.639910000  | 1.278330000  | -0.693705000 |
| 1 | 1.584747000  | 1.895297000  | -0.839102000 |
| 6 | 4.521849000  | 0.287917000  | -0.291659000 |
| 1 | 4.688878000  | -1.660044000 | 0.589624000  |
| 1 | 4.016855000  | 2.190206000  | -1.143425000 |
| 1 | 5.589636000  | 0.413682000  | -0.424493000 |
| 6 | -3.867634000 | 1.612410000  | 0.942770000  |
| 1 | -3.379466000 | 2.562822000  | 0.714046000  |
| 1 | -4.934818000 | 1.706062000  | 0.749422000  |
| 1 | -3.709141000 | 1.407135000  | 2.004231000  |
| 6 | -3.301424000 | -1.284662000 | -1.846479000 |
| 1 | -4.308464000 | -1.227126000 | -2.256265000 |
| 1 | -2.577898000 | -1.042371000 | -2.629980000 |
| 1 | -3.108992000 | -2.307556000 | -1.513633000 |
| 1 | -0.757767000 | 1.977856000  | 0.748367000  |
| 1 | -0.716611000 | 2.000290000  | -0.172315000 |

**9TS<sup>H-H</sup>** (TE= -1370.262716)

|    |              |              |              |
|----|--------------|--------------|--------------|
| 6  | -1.334628000 | 0.093127000  | 1.199323000  |
| 7  | -0.923932000 | -0.071247000 | -0.188858000 |
| 15 | 0.653090000  | 0.010390000  | 0.335544000  |
| 6  | -0.091054000 | 0.146898000  | 1.871581000  |
| 7  | 1.525081000  | -1.323969000 | -0.125072000 |
| 7  | 1.537544000  | 1.270609000  | -0.258986000 |
| 6  | 0.090184000  | 3.160417000  | 0.599579000  |
| 1  | -0.556444000 | 3.020463000  | -0.272669000 |
| 1  | -0.389089000 | 2.671721000  | 1.449816000  |
| 1  | 0.151986000  | 4.230394000  | 0.813161000  |
| 6  | 2.360767000  | 2.677511000  | 1.590269000  |
| 1  | 3.384109000  | 2.373248000  | 1.357323000  |
| 1  | 2.386660000  | 3.692801000  | 1.993190000  |
| 1  | 1.977552000  | 2.018598000  | 2.372295000  |
| 6  | 3.471942000  | 1.680105000  | -1.756952000 |
| 1  | 4.115431000  | 1.146122000  | -1.053738000 |
| 1  | 3.846705000  | 1.497264000  | -2.766598000 |
| 1  | 3.573133000  | 2.751206000  | -1.564265000 |
| 6  | 1.115330000  | 1.946151000  | -2.611953000 |
| 1  | 0.095306000  | 1.556593000  | -2.557002000 |
| 1  | 1.079217000  | 3.018487000  | -2.401510000 |
| 1  | 1.474884000  | 1.824663000  | -3.636279000 |
| 6  | 3.880284000  | -1.867115000 | -0.686586000 |

|   |              |              |              |
|---|--------------|--------------|--------------|
| 1 | 4.904218000  | -1.800804000 | -0.312155000 |
| 1 | 3.707049000  | -2.907378000 | -0.973397000 |
| 1 | 3.805392000  | -1.251205000 | -1.584735000 |
| 6 | 3.008023000  | -2.256712000 | 1.638424000  |
| 1 | 2.329772000  | -1.890773000 | 2.412860000  |
| 1 | 2.760064000  | -3.302357000 | 1.437404000  |
| 1 | 4.026358000  | -2.231123000 | 2.032528000  |
| 6 | 0.259887000  | 0.279269000  | 3.303763000  |
| 1 | 0.078421000  | 1.284885000  | 3.709454000  |
| 1 | -0.307610000 | -0.420012000 | 3.927229000  |
| 1 | 1.318246000  | 0.059821000  | 3.473260000  |
| 6 | 1.487930000  | 2.618183000  | 0.352989000  |
| 6 | 2.032711000  | 1.211804000  | -1.652385000 |
| 1 | 1.945684000  | 3.273036000  | -0.393774000 |
| 1 | 2.010818000  | 0.153586000  | -1.926203000 |
| 6 | 2.907889000  | -1.406748000 | 0.383769000  |
| 1 | 3.186131000  | -0.381580000 | 0.658613000  |
| 6 | 0.904664000  | -2.590320000 | -0.570735000 |
| 1 | 1.713164000  | -3.325527000 | -0.508017000 |
| 6 | 0.487576000  | -2.504665000 | -2.025632000 |
| 1 | 1.340632000  | -2.241454000 | -2.655935000 |
| 1 | 0.096373000  | -3.466820000 | -2.365833000 |
| 1 | -0.297371000 | -1.754685000 | -2.171192000 |
| 6 | -0.213055000 | -3.110489000 | 0.319263000  |
| 1 | 0.088630000  | -3.131821000 | 1.368202000  |
| 1 | -1.116543000 | -2.503053000 | 0.235902000  |
| 1 | -0.466228000 | -4.129105000 | 0.015751000  |
| 5 | -2.008872000 | -0.008305000 | -1.133329000 |
| 6 | -2.682587000 | 0.138025000  | 1.263430000  |
| 1 | -3.367637000 | 0.261666000  | 2.086619000  |
| 6 | -4.456193000 | -0.735231000 | -0.344407000 |
| 6 | -4.549381000 | 0.533987000  | -0.415159000 |
| 7 | -3.199253000 | 0.024440000  | -0.103702000 |
| 6 | -4.732497000 | -2.161142000 | -0.323761000 |
| 1 | -5.792836000 | -2.366558000 | -0.462722000 |
| 1 | -4.162559000 | -2.655918000 | -1.115558000 |
| 1 | -4.410243000 | -2.582461000 | 0.632505000  |
| 6 | -5.089690000 | 1.880380000  | -0.534045000 |
| 1 | -6.171259000 | 1.855491000  | -0.658317000 |
| 1 | -4.843110000 | 2.452666000  | 0.364388000  |
| 1 | -4.631819000 | 2.394319000  | -1.381787000 |
| 1 | -2.209286000 | 1.992588000  | -1.764982000 |
| 1 | -2.150582000 | 0.999249000  | -2.048684000 |

**II-TS<sup>H-H</sup>** (TE= -600.210632)

|   |              |              |              |
|---|--------------|--------------|--------------|
| 6 | -0.845676000 | 1.214313000  | 0.348005000  |
| 6 | -2.310395000 | 0.854412000  | 0.056643000  |
| 6 | -2.353989000 | -0.657975000 | -0.216142000 |
| 6 | -0.937440000 | -0.976954000 | -0.601787000 |
| 7 | -0.153599000 | -0.033100000 | -0.100821000 |
| 1 | -2.641267000 | 1.382850000  | -0.842618000 |
| 1 | -2.968235000 | 1.154854000  | 0.877207000  |
| 6 | 1.259831000  | -0.183050000 | -0.097220000 |
| 6 | 2.035766000  | 0.370825000  | -1.105311000 |
| 6 | 3.409068000  | 0.189270000  | -1.091267000 |
| 6 | 4.005742000  | -0.542415000 | -0.078486000 |
| 6 | 3.227335000  | -1.104714000 | 0.921322000  |
| 6 | 1.855803000  | -0.928245000 | 0.910146000  |
| 1 | 1.558118000  | 0.923302000  | -1.905510000 |
| 1 | 4.014723000  | 0.617490000  | -1.881275000 |
| 1 | 5.080488000  | -0.680909000 | -0.071011000 |
| 1 | 3.690621000  | -1.684675000 | 1.710803000  |
| 1 | 1.224203000  | -1.366688000 | 1.676284000  |
| 6 | -3.393337000 | -1.045614000 | -1.247496000 |
| 1 | -3.309720000 | -2.106781000 | -1.496618000 |
| 1 | -4.398470000 | -0.871312000 | -0.853354000 |
| 1 | -3.273825000 | -0.472330000 | -2.168154000 |
| 6 | -2.622579000 | -1.446347000 | 1.071044000  |
| 1 | -3.598176000 | -1.167878000 | 1.478915000  |
| 1 | -2.625712000 | -2.519778000 | 0.869536000  |
| 1 | -1.865720000 | -1.252726000 | 1.834700000  |
| 6 | -0.402304000 | 2.404416000  | -0.481519000 |
| 1 | 0.636747000  | 2.675481000  | -0.280786000 |
| 1 | -0.516040000 | 2.193266000  | -1.548644000 |
| 1 | -1.027418000 | 3.267973000  | -0.240818000 |
| 6 | -0.560219000 | 1.465585000  | 1.816682000  |
| 1 | -1.067634000 | 2.375456000  | 2.144874000  |
| 1 | -0.905432000 | 0.639012000  | 2.441308000  |
| 1 | 0.511273000  | 1.599781000  | 1.986548000  |
| 1 | -0.703789000 | -1.401803000 | -1.714481000 |
| 1 | -0.945183000 | -0.753933000 | -2.538839000 |

**IIIa-TS<sup>H-H</sup>** (TE= -1010.518206)

|    |              |              |              |
|----|--------------|--------------|--------------|
| 13 | 0.913095000  | -0.188334000 | 0.000000000  |
| 7  | -0.340422000 | -0.189231000 | 1.414797000  |
| 7  | -0.340422000 | -0.189231000 | -1.414797000 |
| 6  | -1.654855000 | -0.116001000 | 1.253844000  |
| 6  | -1.654855000 | -0.116001000 | -1.253844000 |
| 6  | -2.270949000 | -0.106728000 | 0.000000000  |
| 1  | -3.352149000 | -0.085549000 | 0.000000000  |

|   |              |              |              |
|---|--------------|--------------|--------------|
| 6 | 0.245953000  | -0.068139000 | 2.707607000  |
| 6 | 0.363645000  | 1.182136000  | 3.299319000  |
| 6 | 0.768330000  | -1.187263000 | 3.341261000  |
| 6 | 0.975822000  | 1.305175000  | 4.534936000  |
| 6 | 1.378036000  | -1.058632000 | 4.577266000  |
| 6 | 1.480635000  | 0.186265000  | 5.176906000  |
| 1 | 1.064744000  | 2.282453000  | 4.994788000  |
| 1 | 1.778744000  | -1.935542000 | 5.071982000  |
| 1 | 1.962009000  | 0.285367000  | 6.142561000  |
| 6 | 0.245953000  | -0.068139000 | -2.707607000 |
| 6 | 0.768330000  | -1.187263000 | -3.341261000 |
| 6 | 0.363645000  | 1.182136000  | -3.299319000 |
| 6 | 1.378036000  | -1.058632000 | -4.577266000 |
| 6 | 0.975822000  | 1.305175000  | -4.534936000 |
| 6 | 1.480635000  | 0.186265000  | -5.176906000 |
| 1 | 1.778744000  | -1.935542000 | -5.071982000 |
| 1 | 1.064744000  | 2.282453000  | -4.994788000 |
| 1 | 1.962009000  | 0.285367000  | -6.142561000 |
| 6 | -2.537116000 | -0.053912000 | -2.458367000 |
| 1 | -3.576391000 | -0.227284000 | -2.187534000 |
| 1 | -2.466595000 | 0.926400000  | -2.935084000 |
| 1 | -2.231775000 | -0.789508000 | -3.204967000 |
| 6 | -2.537116000 | -0.053912000 | 2.458367000  |
| 1 | -3.576391000 | -0.227284000 | 2.187534000  |
| 1 | -2.231775000 | -0.789508000 | 3.204967000  |
| 1 | -2.466595000 | 0.926400000  | 2.935084000  |
| 1 | -0.017573000 | 2.051001000  | -2.772276000 |
| 1 | 0.687220000  | -2.153993000 | -2.855537000 |
| 1 | 0.687220000  | -2.153993000 | 2.855537000  |
| 1 | -0.017573000 | 2.051001000  | 2.772276000  |
| 1 | 1.153570000  | 1.770135000  | 0.000000000  |
| 1 | 2.073772000  | 0.900002000  | 0.000000000  |

**IIIb-TS<sup>H-H</sup>** (TE= -2692.887142)

|   |              |              |              |
|---|--------------|--------------|--------------|
| 7 | 1.448309000  | 0.440048000  | -0.191299000 |
| 7 | -1.448315000 | 0.440069000  | -0.191275000 |
| 6 | 1.259845000  | 1.747996000  | -0.143920000 |
| 6 | -1.259843000 | 1.748015000  | -0.143990000 |
| 6 | 0.000006000  | 2.353617000  | -0.157557000 |
| 1 | 0.000012000  | 3.435138000  | -0.160669000 |
| 6 | 2.736783000  | -0.137063000 | -0.034722000 |
| 6 | 3.377270000  | -0.708536000 | -1.125653000 |
| 6 | 3.322117000  | -0.199609000 | 1.222971000  |
| 6 | 4.614159000  | -1.309046000 | -0.963725000 |
| 6 | 4.558988000  | -0.800643000 | 1.378962000  |
| 6 | 5.208634000  | -1.353003000 | 0.286794000  |

|    |              |              |              |
|----|--------------|--------------|--------------|
| 1  | 5.114191000  | -1.747399000 | -1.819428000 |
| 1  | 5.013706000  | -0.845208000 | 2.361694000  |
| 1  | 6.175298000  | -1.826159000 | 0.412115000  |
| 6  | -2.736793000 | -0.137032000 | -0.034699000 |
| 6  | -3.322153000 | -0.199502000 | 1.222988000  |
| 6  | -3.377245000 | -0.708597000 | -1.125603000 |
| 6  | -4.559001000 | -0.800576000 | 1.378997000  |
| 6  | -4.614110000 | -1.309153000 | -0.963654000 |
| 6  | -5.208603000 | -1.353048000 | 0.286858000  |
| 1  | -5.013739000 | -0.845082000 | 2.361722000  |
| 1  | -5.114106000 | -1.747585000 | -1.819337000 |
| 1  | -6.175246000 | -1.826242000 | 0.412196000  |
| 6  | -2.452918000 | 2.649074000  | -0.083892000 |
| 1  | -2.900483000 | 2.626564000  | 0.912222000  |
| 1  | -2.173037000 | 3.676509000  | -0.306957000 |
| 1  | -3.224476000 | 2.325902000  | -0.784965000 |
| 6  | 2.452918000  | 2.649040000  | -0.083541000 |
| 1  | 2.173183000  | 3.676389000  | -0.307187000 |
| 1  | 2.899876000  | 2.626959000  | 0.912857000  |
| 1  | 3.224892000  | 2.325555000  | -0.784008000 |
| 1  | -2.896054000 | -0.671432000 | -2.097269000 |
| 1  | -2.788331000 | 0.214905000  | 2.072079000  |
| 1  | 2.788242000  | 0.214688000  | 2.072080000  |
| 1  | 2.896098000  | -0.671317000 | -2.097326000 |
| 31 | -0.000012000 | -0.862070000 | -0.215776000 |
| 1  | 0.000009000  | -2.072948000 | 0.762763000  |
| 1  | 0.000060000  | -1.097477000 | 1.764810000  |

Cartesian coordinates of the transition states involved in the activation of N-H bond of NH<sub>3</sub> by **4**-, **7**, **9** and **II**, along with their total energies (in hartrees) including zero point vibrational correction.

**4TS<sup>N-H</sup>** (TE= -1770.002380)

|    |              |              |              |
|----|--------------|--------------|--------------|
| 6  | -0.699444000 | -0.893750000 | -0.898148000 |
| 6  | -2.619425000 | -0.586635000 | 0.275249000  |
| 7  | -0.403192000 | -0.031281000 | 0.169846000  |
| 7  | -1.990453000 | -1.172595000 | -0.917729000 |
| 6  | -2.556747000 | -2.212251000 | -1.735000000 |
| 1  | -3.334586000 | -1.823266000 | -2.399610000 |
| 1  | -1.780925000 | -2.664109000 | -2.353813000 |
| 1  | -2.999631000 | -2.987684000 | -1.102049000 |
| 15 | -4.237576000 | -0.040129000 | 0.241497000  |
| 6  | -5.460045000 | -1.284856000 | -0.249496000 |
| 1  | -6.463929000 | -0.867816000 | -0.148798000 |
| 1  | -5.314356000 | -1.589791000 | -1.286194000 |
| 1  | -5.364734000 | -2.159856000 | 0.394401000  |



|    |              |              |              |
|----|--------------|--------------|--------------|
| 6  | -4.579116000 | 1.350659000  | -0.869745000 |
| 1  | -5.644402000 | 1.586995000  | -0.917927000 |
| 1  | -4.028168000 | 2.210116000  | -0.478979000 |
| 1  | -4.215139000 | 1.111960000  | -1.871697000 |
| 6  | -4.711271000 | 0.521459000  | 1.868377000  |
| 1  | -5.778361000 | 0.754639000  | 1.861541000  |
| 1  | -4.499914000 | -0.255571000 | 2.602010000  |
| 1  | -4.123296000 | 1.425515000  | 2.082407000  |
| 15 | 1.203896000  | -0.200581000 | -0.263185000 |
| 6  | 0.526018000  | -1.200844000 | -1.504373000 |
| 7  | 1.902778000  | 1.248450000  | -0.608929000 |
| 7  | 2.187697000  | -0.918299000 | 0.842432000  |
| 6  | 0.900588000  | -3.077787000 | 1.159648000  |
| 1  | 0.241823000  | -2.539145000 | 1.844330000  |
| 1  | 0.391482000  | -3.165119000 | 0.197788000  |
| 1  | 1.050930000  | -4.086081000 | 1.552023000  |
| 6  | 3.123999000  | -3.030347000 | -0.031962000 |
| 1  | 4.116768000  | -2.574751000 | -0.041817000 |
| 1  | 3.238215000  | -4.098633000 | 0.166370000  |
| 1  | 2.687836000  | -2.921718000 | -1.026571000 |
| 6  | 4.171995000  | -0.372740000 | 2.224038000  |
| 1  | 4.756059000  | -0.253980000 | 1.308241000  |
| 1  | 4.550685000  | 0.335618000  | 2.964023000  |
| 1  | 4.354198000  | -1.376429000 | 2.616227000  |
| 6  | 1.853553000  | -0.278566000 | 3.219170000  |
| 1  | 0.805940000  | -0.037102000 | 3.014179000  |
| 1  | 1.901966000  | -1.299522000 | 3.608204000  |
| 1  | 2.210516000  | 0.389240000  | 4.006208000  |
| 6  | 4.236482000  | 2.092272000  | -0.640739000 |
| 1  | 5.216883000  | 1.933736000  | -1.094669000 |
| 1  | 3.977607000  | 3.143749000  | -0.786728000 |
| 1  | 4.323545000  | 1.910433000  | 0.431812000  |
| 6  | 3.103346000  | 1.399622000  | -2.775274000 |
| 1  | 2.381940000  | 0.712279000  | -3.223045000 |
| 1  | 2.784327000  | 2.420925000  | -2.999021000 |
| 1  | 4.072004000  | 1.245619000  | -3.255539000 |
| 6  | 0.931743000  | -1.998357000 | -2.686696000 |
| 1  | 0.863559000  | -3.084375000 | -2.532455000 |
| 1  | 0.328625000  | -1.762320000 | -3.570082000 |
| 1  | 1.969999000  | -1.788919000 | -2.958083000 |
| 6  | 2.247988000  | -2.388066000 | 1.023992000  |
| 6  | 2.700352000  | -0.108628000 | 1.973032000  |
| 1  | 2.755304000  | -2.518852000 | 1.983651000  |
| 1  | 2.606595000  | 0.931545000  | 1.651703000  |
| 6  | 3.215647000  | 1.169437000  | -1.279254000 |
| 1  | 3.568760000  | 0.139421000  | -1.126620000 |

|   |              |             |              |
|---|--------------|-------------|--------------|
| 6 | 1.185294000  | 2.543443000 | -0.653137000 |
| 1 | 1.909201000  | 3.233379000 | -1.098452000 |
| 6 | 0.882956000  | 3.039561000 | 0.745377000  |
| 1 | 1.801442000  | 3.127612000 | 1.331293000  |
| 1 | 0.408948000  | 4.023254000 | 0.705342000  |
| 1 | 0.186988000  | 2.373450000 | 1.264105000  |
| 6 | -0.039793000 | 2.560148000 | -1.553613000 |
| 1 | 0.187736000  | 2.147707000 | -2.538952000 |
| 1 | -0.868129000 | 1.994702000 | -1.121935000 |
| 1 | -0.376003000 | 3.591494000 | -1.684111000 |
| 5 | -1.590607000 | 0.258155000 | 1.026430000  |
| 1 | -1.944232000 | 1.570925000 | 1.649405000  |
| 7 | -2.518915000 | 2.841559000 | 1.729222000  |
| 1 | -2.037423000 | 3.308044000 | 2.500171000  |
| 1 | -2.148538000 | 3.315067000 | 0.902323000  |

**5TS<sup>N-H</sup>** (TE= -1388.810179)

|    |              |              |              |
|----|--------------|--------------|--------------|
| 6  | -1.509697000 | -0.485186000 | 0.887018000  |
| 6  | -3.369810000 | -0.272025000 | -0.505448000 |
| 7  | -1.009281000 | -0.182628000 | -0.402434000 |
| 7  | -2.822710000 | -0.591943000 | 0.865413000  |
| 6  | -3.633957000 | -0.751793000 | 2.044061000  |
| 1  | -4.445972000 | -1.456623000 | 1.854178000  |
| 1  | -3.029469000 | -1.144419000 | 2.861488000  |
| 1  | -4.072834000 | 0.198816000  | 2.363396000  |
| 15 | 0.520017000  | -0.136023000 | 0.291267000  |
| 6  | -0.402860000 | -0.526281000 | 1.717976000  |
| 7  | 1.541549000  | -1.238265000 | -0.368746000 |
| 7  | 1.309477000  | 1.298036000  | 0.263325000  |
| 6  | -0.549511000 | 2.770225000  | 1.142814000  |
| 1  | -0.943296000 | 2.828814000  | 0.125671000  |
| 1  | -1.135767000 | 2.033111000  | 1.697008000  |
| 1  | -0.697552000 | 3.740139000  | 1.621962000  |
| 6  | 1.485493000  | 2.258170000  | 2.540975000  |
| 1  | 2.557815000  | 2.052595000  | 2.512378000  |
| 1  | 1.326816000  | 3.167105000  | 3.125651000  |
| 1  | 0.992147000  | 1.438348000  | 3.065182000  |
| 6  | 3.487788000  | 2.229053000  | -0.466099000 |
| 1  | 3.992838000  | 1.571732000  | 0.245931000  |
| 1  | 4.136265000  | 2.348428000  | -1.336596000 |
| 1  | 3.382766000  | 3.214864000  | -0.006363000 |
| 6  | 1.423198000  | 2.535829000  | -1.889711000 |
| 1  | 0.502643000  | 2.071011000  | -2.256076000 |
| 1  | 1.156824000  | 3.502487000  | -1.451744000 |
| 1  | 2.062831000  | 2.737417000  | -2.751749000 |
| 6  | 4.014167000  | -1.490426000 | -0.430235000 |

|   |              |              |              |
|---|--------------|--------------|--------------|
| 1 | 4.896635000  | -1.574793000 | 0.207105000  |
| 1 | 4.038437000  | -2.330500000 | -1.128171000 |
| 1 | 4.098382000  | -0.567508000 | -1.006284000 |
| 6 | 2.644594000  | -2.789012000 | 1.227346000  |
| 1 | 1.750252000  | -2.779803000 | 1.854623000  |
| 1 | 2.595683000  | -3.664298000 | 0.574671000  |
| 1 | 3.517152000  | -2.909595000 | 1.872681000  |
| 6 | -0.180700000 | -0.843651000 | 3.151152000  |
| 1 | -0.664672000 | -0.130156000 | 3.828333000  |
| 1 | -0.540469000 | -1.842224000 | 3.418686000  |
| 1 | 0.886287000  | -0.826306000 | 3.386005000  |
| 6 | 0.930680000  | 2.433340000  | 1.142500000  |
| 6 | 2.157787000  | 1.650169000  | -0.906206000 |
| 1 | 1.438778000  | 3.292966000  | 0.698813000  |
| 1 | 2.364579000  | 0.703421000  | -1.408683000 |
| 6 | 2.761079000  | -1.506620000 | 0.424766000  |
| 1 | 2.842482000  | -0.673577000 | 1.138329000  |
| 6 | 1.177543000  | -2.205313000 | -1.429178000 |
| 1 | 2.064439000  | -2.839527000 | -1.523579000 |
| 6 | 0.976089000  | -1.503912000 | -2.756970000 |
| 1 | 1.875096000  | -0.953391000 | -3.044840000 |
| 1 | 0.760943000  | -2.234862000 | -3.539324000 |
| 1 | 0.131755000  | -0.806154000 | -2.722440000 |
| 6 | 0.019418000  | -3.121435000 | -1.071090000 |
| 1 | 0.156622000  | -3.572064000 | -0.086188000 |
| 1 | -0.932703000 | -2.588532000 | -1.079078000 |
| 1 | -0.047730000 | -3.925590000 | -1.806869000 |
| 5 | -2.045311000 | 0.026804000  | -1.400736000 |
| 6 | -4.147118000 | -1.468843000 | -1.022613000 |
| 1 | -5.009060000 | -1.703645000 | -0.387028000 |
| 1 | -4.520351000 | -1.254972000 | -2.025705000 |
| 1 | -3.514258000 | -2.358326000 | -1.086396000 |
| 6 | -4.264147000 | 0.951539000  | -0.413422000 |
| 1 | -4.594840000 | 1.234315000  | -1.414205000 |
| 1 | -5.155449000 | 0.762116000  | 0.196149000  |
| 1 | -3.727801000 | 1.806386000  | 0.009146000  |
| 1 | -1.913065000 | 1.014630000  | -2.392475000 |
| 7 | -1.851060000 | 2.373838000  | -2.784565000 |
| 1 | -2.836626000 | 2.594480000  | -2.944870000 |
| 1 | -1.616283000 | 2.933780000  | -1.960810000 |

**6TS<sup>N-H</sup>** (TE= -1557.196122)

|   |             |              |              |
|---|-------------|--------------|--------------|
| 6 | 0.619661000 | -0.551096000 | 1.082912000  |
| 7 | 0.318593000 | 0.094907000  | -0.120287000 |
| 7 | 1.927540000 | -0.840666000 | 1.146068000  |
| 6 | 2.398174000 | -2.017278000 | 1.846304000  |

|    |              |              |              |
|----|--------------|--------------|--------------|
| 1  | 3.441624000  | -1.889704000 | 2.168371000  |
| 1  | 1.775640000  | -2.170649000 | 2.739023000  |
| 1  | 2.335137000  | -2.907670000 | 1.195681000  |
| 15 | -1.323470000 | -0.086208000 | 0.288317000  |
| 6  | -0.586395000 | -0.780926000 | 1.736676000  |
| 7  | -2.125713000 | 1.363764000  | 0.282602000  |
| 7  | -2.178906000 | -1.101492000 | -0.703633000 |
| 6  | -0.937136000 | -3.276793000 | -0.334489000 |
| 1  | -0.205060000 | -2.925662000 | -1.080537000 |
| 1  | -0.504055000 | -3.126061000 | 0.666699000  |
| 1  | -1.074282000 | -4.360641000 | -0.477121000 |
| 6  | -3.243535000 | -2.881456000 | 0.637237000  |
| 1  | -4.240621000 | -2.461657000 | 0.427158000  |
| 1  | -3.350152000 | -3.970470000 | 0.766889000  |
| 1  | -2.895169000 | -2.467096000 | 1.597763000  |
| 6  | -3.994726000 | -0.877990000 | -2.382608000 |
| 1  | -4.666519000 | -0.516073000 | -1.587000000 |
| 1  | -4.272802000 | -0.370147000 | -3.319841000 |
| 1  | -4.189684000 | -1.953468000 | -2.531420000 |
| 6  | -1.584868000 | -1.101391000 | -3.122497000 |
| 1  | -0.542154000 | -0.821642000 | -2.887100000 |
| 1  | -1.638720000 | -2.197658000 | -3.237285000 |
| 1  | -1.840809000 | -0.656812000 | -4.097243000 |
| 6  | -4.432292000 | 2.144915000  | -0.214219000 |
| 1  | -5.489580000 | 2.002095000  | 0.060518000  |
| 1  | -4.224309000 | 3.225501000  | -0.147596000 |
| 1  | -4.308396000 | 1.839579000  | -1.265182000 |
| 6  | -3.701255000 | 1.741780000  | 2.167986000  |
| 1  | -3.070486000 | 1.119637000  | 2.824669000  |
| 1  | -3.420254000 | 2.796159000  | 2.328886000  |
| 1  | -4.748825000 | 1.627800000  | 2.489132000  |
| 6  | -0.977248000 | -1.364458000 | 3.045565000  |
| 1  | -0.985779000 | -2.472209000 | 3.061327000  |
| 1  | -0.299832000 | -1.034454000 | 3.851326000  |
| 1  | -1.987941000 | -1.037658000 | 3.341586000  |
| 6  | -2.273859000 | -2.563955000 | -0.486374000 |
| 6  | -2.538901000 | -0.595296000 | -2.055358000 |
| 1  | -2.723569000 | -2.943241000 | -1.419830000 |
| 1  | -2.419314000 | 0.501219000  | -1.999148000 |
| 6  | -3.542083000 | 1.334088000  | 0.712183000  |
| 1  | -3.859625000 | 0.276701000  | 0.624958000  |
| 6  | -1.438256000 | 2.683633000  | 0.253847000  |
| 1  | -2.242219000 | 3.400627000  | 0.497738000  |
| 6  | -0.942483000 | 3.012877000  | -1.141529000 |
| 1  | -1.769503000 | 2.972354000  | -1.869486000 |
| 1  | -0.513184000 | 4.027673000  | -1.165540000 |

|   |              |              |              |
|---|--------------|--------------|--------------|
| 1 | -0.129697000 | 2.345429000  | -1.471123000 |
| 6 | -0.371407000 | 2.855704000  | 1.323772000  |
| 1 | -0.754182000 | 2.596066000  | 2.323960000  |
| 1 | 0.520084000  | 2.242573000  | 1.119391000  |
| 1 | -0.041529000 | 3.906663000  | 1.345712000  |
| 5 | 1.485497000  | 0.089026000  | -1.033731000 |
| 7 | 2.481809000  | -0.572553000 | -0.151086000 |
| 6 | 3.850025000  | -0.271315000 | -0.187159000 |
| 6 | 4.532191000  | -0.430751000 | -1.401337000 |
| 6 | 4.541049000  | 0.228211000  | 0.924294000  |
| 6 | 5.874452000  | -0.087955000 | -1.499459000 |
| 1 | 3.977855000  | -0.812581000 | -2.263554000 |
| 6 | 5.892001000  | 0.553953000  | 0.817933000  |
| 1 | 4.004688000  | 0.393678000  | 1.863326000  |
| 6 | 6.567197000  | 0.402074000  | -0.390243000 |
| 1 | 6.390270000  | -0.210100000 | -2.456728000 |
| 1 | 6.417199000  | 0.948899000  | 1.693211000  |
| 1 | 7.625521000  | 0.665588000  | -0.470172000 |
| 1 | 1.809092000  | 1.124260000  | -1.784485000 |
| 7 | 2.289846000  | 2.514178000  | -1.432287000 |
| 1 | 3.291107000  | 2.305399000  | -1.301653000 |
| 1 | 1.990575000  | 2.689337000  | -0.461645000 |

**7TS<sup>N-H</sup> (TE= -655.337819)**

|   |              |              |              |
|---|--------------|--------------|--------------|
| 6 | 1.442994000  | -1.492691000 | -0.942778000 |
| 6 | 0.111327000  | -1.476027000 | -0.968693000 |
| 1 | 2.158432000  | -2.107409000 | -1.465743000 |
| 1 | -0.522215000 | -2.121439000 | -1.560277000 |
| 6 | 3.174517000  | -0.492214000 | 0.663393000  |
| 6 | 3.139380000  | 0.302748000  | -0.324426000 |
| 7 | 1.857690000  | -0.437925000 | -0.055112000 |
| 7 | -0.422285000 | -0.484660000 | -0.149598000 |
| 5 | 0.617476000  | 0.263384000  | 0.533414000  |
| 6 | -1.810768000 | -0.270074000 | -0.027372000 |
| 6 | -2.726684000 | -1.294440000 | -0.235081000 |
| 6 | -2.266320000 | 0.998431000  | 0.321514000  |
| 6 | -4.083767000 | -1.050168000 | -0.107857000 |
| 1 | -2.384329000 | -2.294853000 | -0.473920000 |
| 6 | -3.623071000 | 1.227325000  | 0.453940000  |
| 1 | -1.549718000 | 1.799834000  | 0.479118000  |
| 6 | -4.539824000 | 0.210050000  | 0.236878000  |
| 1 | -4.787120000 | -1.858995000 | -0.269938000 |
| 1 | -3.966827000 | 2.219447000  | 0.723191000  |
| 1 | -5.602002000 | 0.398360000  | 0.338343000  |
| 6 | 3.453266000  | 1.298524000  | -1.332870000 |
| 1 | 2.733654000  | 2.119240000  | -1.246197000 |

|   |             |              |              |
|---|-------------|--------------|--------------|
| 1 | 4.463864000 | 1.678766000  | -1.194391000 |
| 1 | 3.365789000 | 0.867373000  | -2.332758000 |
| 6 | 3.591651000 | -1.243421000 | 1.834144000  |
| 1 | 4.627718000 | -1.018071000 | 2.081450000  |
| 1 | 2.953648000 | -0.980985000 | 2.681449000  |
| 1 | 3.493221000 | -2.316216000 | 1.654085000  |
| 1 | 0.631008000 | 1.605941000  | 0.774286000  |
| 7 | 0.594211000 | 2.947452000  | 0.235714000  |
| 1 | 1.553993000 | 3.296839000  | 0.261491000  |
| 1 | 0.359993000 | 2.912919000  | -0.759045000 |

**9TS<sup>N-H</sup>** (TE= -1425.612576)

|    |              |              |              |
|----|--------------|--------------|--------------|
| 6  | -1.140694000 | -0.430544000 | 1.374260000  |
| 7  | -0.823024000 | -0.291352000 | -0.041286000 |
| 15 | 0.781777000  | -0.110370000 | 0.399603000  |
| 6  | 0.137852000  | -0.339803000 | 1.970984000  |
| 7  | 1.752779000  | -1.233305000 | -0.330811000 |
| 7  | 1.465543000  | 1.335544000  | 0.007072000  |
| 6  | -0.272404000 | 2.837211000  | 1.067445000  |
| 1  | -0.866634000 | 2.758070000  | 0.153129000  |
| 1  | -0.686699000 | 2.146395000  | 1.804922000  |
| 1  | -0.382057000 | 3.852109000  | 1.456392000  |
| 6  | 2.035057000  | 2.595185000  | 2.058257000  |
| 1  | 3.092280000  | 2.451527000  | 1.823156000  |
| 1  | 1.923699000  | 3.557652000  | 2.563209000  |
| 1  | 1.729868000  | 1.815222000  | 2.757505000  |
| 6  | 3.353511000  | 2.243055000  | -1.318726000 |
| 1  | 4.050484000  | 1.703422000  | -0.672904000 |
| 1  | 3.777005000  | 2.274388000  | -2.325094000 |
| 1  | 3.290654000  | 3.274943000  | -0.963716000 |
| 6  | 1.005898000  | 2.296178000  | -2.240585000 |
| 1  | 0.050476000  | 1.768288000  | -2.313655000 |
| 1  | 0.802819000  | 3.308087000  | -1.877106000 |
| 1  | 1.410648000  | 2.392085000  | -3.250481000 |
| 6  | 4.165901000  | -1.392761000 | -0.889958000 |
| 1  | 5.168315000  | -1.346334000 | -0.459031000 |
| 1  | 4.094049000  | -2.333133000 | -1.442199000 |
| 1  | 4.063329000  | -0.572490000 | -1.602516000 |
| 6  | 3.283601000  | -2.431017000 | 1.221824000  |
| 1  | 2.540501000  | -2.347462000 | 2.018144000  |
| 1  | 3.173175000  | -3.412193000 | 0.752781000  |
| 1  | 4.277848000  | -2.394065000 | 1.672184000  |
| 6  | 0.580403000  | -0.398064000 | 3.383100000  |
| 1  | 0.210487000  | 0.442146000  | 3.986928000  |
| 1  | 0.250768000  | -1.316191000 | 3.881626000  |
| 1  | 1.671490000  | -0.379593000 | 3.453360000  |

|   |              |              |              |
|---|--------------|--------------|--------------|
| 6 | 1.197260000  | 2.561265000  | 0.796581000  |
| 6 | 1.997838000  | 1.564158000  | -1.358787000 |
| 1 | 1.549195000  | 3.375780000  | 0.158211000  |
| 1 | 2.141408000  | 0.568807000  | -1.784303000 |
| 6 | 3.125211000  | -1.308827000 | 0.211063000  |
| 1 | 3.288682000  | -0.361438000 | 0.743864000  |
| 6 | 1.255125000  | -2.409236000 | -1.075527000 |
| 1 | 2.142056000  | -3.036650000 | -1.208437000 |
| 6 | 0.777662000  | -2.013220000 | -2.458437000 |
| 1 | 1.576522000  | -1.518489000 | -3.016042000 |
| 1 | 0.468148000  | -2.897965000 | -3.019788000 |
| 1 | -0.081315000 | -1.336686000 | -2.409203000 |
| 6 | 0.236514000  | -3.259299000 | -0.331203000 |
| 1 | 0.574365000  | -3.490653000 | 0.680549000  |
| 1 | -0.736140000 | -2.767812000 | -0.262676000 |
| 1 | 0.095202000  | -4.200694000 | -0.867153000 |
| 5 | -1.956583000 | -0.215700000 | -0.895227000 |
| 6 | -2.479607000 | -0.534159000 | 1.515699000  |
| 1 | -3.117127000 | -0.607465000 | 2.381671000  |
| 6 | -4.394508000 | -0.984382000 | -0.132579000 |
| 6 | -4.396486000 | 0.276111000  | 0.048296000  |
| 7 | -3.069798000 | -0.386765000 | 0.181257000  |
| 6 | -4.795875000 | -2.361815000 | -0.365878000 |
| 1 | -5.875544000 | -2.445752000 | -0.479718000 |
| 1 | -4.308438000 | -2.740928000 | -1.268009000 |
| 1 | -4.476166000 | -2.984946000 | 0.473523000  |
| 6 | -4.783535000 | 1.667459000  | 0.211342000  |
| 1 | -4.267798000 | 2.268876000  | -0.544230000 |
| 1 | -5.860153000 | 1.794662000  | 0.110939000  |
| 1 | -4.470667000 | 2.022254000  | 1.197069000  |
| 1 | -2.195495000 | 0.588208000  | -1.986379000 |
| 7 | -2.433564000 | 1.890427000  | -2.586632000 |
| 1 | -3.451008000 | 1.977374000  | -2.643387000 |
| 1 | -2.157858000 | 2.617880000  | -1.921260000 |

**II-TS<sup>N-H</sup> (TE= -655.559058)**

|   |              |              |              |
|---|--------------|--------------|--------------|
| 6 | -0.766491000 | 1.319131000  | -0.570683000 |
| 6 | -2.244444000 | 0.916049000  | -0.498115000 |
| 6 | -2.330552000 | -0.312146000 | 0.421317000  |
| 6 | -0.932541000 | -0.846016000 | 0.398681000  |
| 7 | -0.111945000 | 0.092015000  | -0.019646000 |
| 1 | -2.591066000 | 0.636411000  | -1.497426000 |
| 1 | -2.869932000 | 1.743240000  | -0.152481000 |
| 6 | 1.300526000  | -0.048255000 | 0.101010000  |
| 6 | 2.089736000  | -0.323000000 | -1.004989000 |
| 6 | 3.457583000  | -0.468269000 | -0.848833000 |

|   |              |              |              |
|---|--------------|--------------|--------------|
| 6 | 4.034400000  | -0.342655000 | 0.403736000  |
| 6 | 3.241013000  | -0.079387000 | 1.508838000  |
| 6 | 1.874155000  | 0.066186000  | 1.358510000  |
| 1 | 1.629328000  | -0.446743000 | -1.977611000 |
| 1 | 4.073911000  | -0.693058000 | -1.711017000 |
| 1 | 5.105168000  | -0.459792000 | 0.520885000  |
| 1 | 3.687707000  | 0.009891000  | 2.491876000  |
| 1 | 1.231307000  | 0.265423000  | 2.210060000  |
| 6 | -3.387172000 | -1.302759000 | -0.024806000 |
| 1 | -3.354257000 | -2.208324000 | 0.585465000  |
| 1 | -4.381299000 | -0.858818000 | 0.077727000  |
| 1 | -3.242905000 | -1.589995000 | -1.067313000 |
| 6 | -2.606257000 | 0.086409000  | 1.876195000  |
| 1 | -3.576647000 | 0.585930000  | 1.942725000  |
| 1 | -2.628332000 | -0.796794000 | 2.517946000  |
| 1 | -1.845609000 | 0.765532000  | 2.268316000  |
| 6 | -0.335623000 | 1.565422000  | -2.003810000 |
| 1 | 0.715636000  | 1.853556000  | -2.070395000 |
| 1 | -0.500018000 | 0.673123000  | -2.613842000 |
| 1 | -0.932338000 | 2.378923000  | -2.423441000 |
| 6 | -0.418546000 | 2.518509000  | 0.291660000  |
| 1 | -0.905778000 | 3.411332000  | -0.105890000 |
| 1 | -0.746094000 | 2.383617000  | 1.324388000  |
| 1 | 0.659524000  | 2.697287000  | 0.293937000  |
| 1 | -0.637408000 | -1.962459000 | 0.342914000  |
| 7 | -0.617569000 | -2.871499000 | -0.902983000 |
| 1 | -1.543768000 | -3.020352000 | -1.302925000 |
| 1 | -0.095252000 | -2.406852000 | -1.647739000 |

Cartesian coordinates of the transition states involved in the activation of C-H bond of CH<sub>4</sub> by **4-7**, **9** and **II** via  $\sigma_{\text{CH}_2}$  approach, along with their total energies (in hartrees) including zero point vibrational correction.

**4TS $_{\sigma}^{\text{C-H}}$**  (TE= -1753.915941)

|    |              |              |              |
|----|--------------|--------------|--------------|
| 6  | -0.710348000 | -0.815853000 | -0.948535000 |
| 6  | -2.617071000 | -0.604473000 | 0.266273000  |
| 7  | -0.413859000 | 0.014442000  | 0.146760000  |
| 7  | -1.997634000 | -1.114270000 | -0.966594000 |
| 6  | -2.542693000 | -2.167253000 | -1.781904000 |
| 1  | -3.369729000 | -1.808452000 | -2.402326000 |
| 1  | -1.773007000 | -2.562924000 | -2.445284000 |
| 1  | -2.914281000 | -2.978290000 | -1.146582000 |
| 15 | -4.228855000 | -0.054718000 | 0.261044000  |
| 6  | -5.479941000 | -1.266762000 | -0.236856000 |
| 1  | -6.476061000 | -0.839919000 | -0.103218000 |



|    |              |              |              |
|----|--------------|--------------|--------------|
| 1  | -5.358979000 | -1.541131000 | -1.285367000 |
| 1  | -5.381949000 | -2.162087000 | 0.377914000  |
| 6  | -4.586426000 | 1.363470000  | -0.812044000 |
| 1  | -5.638957000 | 1.652689000  | -0.775113000 |
| 1  | -3.958130000 | 2.195881000  | -0.487510000 |
| 1  | -4.322761000 | 1.100465000  | -1.839315000 |
| 6  | -4.666560000 | 0.434048000  | 1.924685000  |
| 1  | -5.686327000 | 0.824979000  | 1.926892000  |
| 1  | -4.597417000 | -0.430090000 | 2.584493000  |
| 1  | -3.968246000 | 1.206980000  | 2.249851000  |
| 15 | 1.196306000  | -0.178815000 | -0.268900000 |
| 6  | 0.512878000  | -1.108390000 | -1.561706000 |
| 7  | 1.946848000  | 1.259027000  | -0.539686000 |
| 7  | 2.138973000  | -0.975239000 | 0.819670000  |
| 6  | 0.793640000  | -3.115203000 | 1.000985000  |
| 1  | 0.132351000  | -2.593664000 | 1.696499000  |
| 1  | 0.304556000  | -3.143662000 | 0.024839000  |
| 1  | 0.910943000  | -4.144579000 | 1.347272000  |
| 6  | 3.047431000  | -3.064885000 | -0.133806000 |
| 1  | 4.052332000  | -2.638682000 | -0.093019000 |
| 1  | 3.126369000  | -4.144973000 | 0.010816000  |
| 1  | 2.643503000  | -2.891881000 | -1.132880000 |
| 6  | 4.114895000  | -0.544375000 | 2.252817000  |
| 1  | 4.715290000  | -0.393100000 | 1.352517000  |
| 1  | 4.498545000  | 0.116498000  | 3.033128000  |
| 1  | 4.268256000  | -1.570869000 | 2.595525000  |
| 6  | 1.786101000  | -0.446017000 | 3.221299000  |
| 1  | 0.745902000  | -0.174380000 | 3.013957000  |
| 1  | 1.809866000  | -1.485000000 | 3.562223000  |
| 1  | 2.145192000  | 0.176758000  | 4.043560000  |
| 6  | 4.300818000  | 2.040041000  | -0.480167000 |
| 1  | 5.288036000  | 1.874917000  | -0.916786000 |
| 1  | 4.071238000  | 3.102758000  | -0.589094000 |
| 1  | 4.356654000  | 1.812944000  | 0.585919000  |
| 6  | 3.206734000  | 1.461879000  | -2.668363000 |
| 1  | 2.478787000  | 0.813291000  | -3.161111000 |
| 1  | 2.922079000  | 2.499710000  | -2.859856000 |
| 1  | 4.183201000  | 1.298838000  | -3.129540000 |
| 6  | 0.917264000  | -1.879511000 | -2.761818000 |
| 1  | 0.841502000  | -2.968825000 | -2.636044000 |
| 1  | 0.317359000  | -1.616500000 | -3.639494000 |
| 1  | 1.957377000  | -1.669739000 | -3.025979000 |
| 6  | 2.159866000  | -2.452828000 | 0.930500000  |
| 6  | 2.653189000  | -0.234012000 | 1.995930000  |
| 1  | 2.638870000  | -2.642676000 | 1.894705000  |
| 1  | 2.587005000  | 0.822815000  | 1.725423000  |

|   |              |             |              |
|---|--------------|-------------|--------------|
| 6 | 3.273547000  | 1.170393000 | -1.180235000 |
| 1 | 3.595308000  | 0.125996000 | -1.060665000 |
| 6 | 1.259233000  | 2.570968000 | -0.556325000 |
| 1 | 2.013009000  | 3.262663000 | -0.945862000 |
| 6 | 0.920289000  | 3.013474000 | 0.851608000  |
| 1 | 1.823071000  | 3.062163000 | 1.465991000  |
| 1 | 0.460317000  | 4.004055000 | 0.839270000  |
| 1 | 0.204608000  | 2.334116000 | 1.323396000  |
| 6 | 0.070250000  | 2.648062000 | -1.500553000 |
| 1 | 0.332456000  | 2.279623000 | -2.494728000 |
| 1 | -0.782356000 | 2.077038000 | -1.127427000 |
| 1 | -0.248341000 | 3.688976000 | -1.593393000 |
| 5 | -1.590121000 | 0.231607000 | 1.046973000  |
| 1 | -1.948196000 | 1.572387000 | 1.574499000  |
| 6 | -2.397352000 | 3.043797000 | 1.492368000  |
| 1 | -3.458386000 | 3.270502000 | 1.663701000  |
| 1 | -1.805766000 | 3.552867000 | 2.262397000  |
| 1 | -2.111020000 | 3.449340000 | 0.512813000  |

**5TS<sub>σ</sub><sup>C-H</sup> (TE= -1372.729032)**

|    |              |              |              |
|----|--------------|--------------|--------------|
| 6  | -1.562117000 | -0.080944000 | 0.807028000  |
| 6  | -3.390486000 | -0.181659000 | -0.653646000 |
| 7  | -1.018045000 | -0.018124000 | -0.497471000 |
| 7  | -2.880506000 | -0.120557000 | 0.775957000  |
| 6  | -3.695229000 | -0.322783000 | 1.944719000  |
| 1  | -3.921548000 | -1.381373000 | 2.113529000  |
| 1  | -3.183215000 | 0.065349000  | 2.826509000  |
| 1  | -4.638639000 | 0.215466000  | 1.840569000  |
| 15 | 0.488102000  | -0.041937000 | 0.218744000  |
| 6  | -0.478285000 | -0.094513000 | 1.671371000  |
| 7  | 1.383349000  | -1.348519000 | -0.256812000 |
| 7  | 1.473309000  | 1.247603000  | -0.035617000 |
| 6  | 0.248222000  | 3.093795000  | 1.170367000  |
| 1  | -0.268161000 | 3.353631000  | 0.244955000  |
| 1  | -0.418853000 | 2.464448000  | 1.762774000  |
| 1  | 0.433262000  | 4.014399000  | 1.728473000  |
| 6  | 2.310626000  | 2.024605000  | 2.151649000  |
| 1  | 3.309132000  | 1.646319000  | 1.921764000  |
| 1  | 2.417989000  | 2.892611000  | 2.805693000  |
| 1  | 1.774209000  | 1.253944000  | 2.711033000  |
| 6  | 3.578323000  | 1.719883000  | -1.285622000 |
| 1  | 4.113277000  | 1.019202000  | -0.641694000 |
| 1  | 4.019402000  | 1.661982000  | -2.282807000 |
| 1  | 3.759002000  | 2.731610000  | -0.914500000 |
| 6  | 1.350254000  | 2.399786000  | -2.228238000 |
| 1  | 0.321179000  | 2.074700000  | -2.388867000 |

|   |              |              |              |
|---|--------------|--------------|--------------|
| 1 | 1.334296000  | 3.391812000  | -1.766922000 |
| 1 | 1.834734000  | 2.495853000  | -3.202232000 |
| 6 | 3.739761000  | -1.881368000 | -0.827209000 |
| 1 | 4.761652000  | -1.813220000 | -0.447465000 |
| 1 | 3.584760000  | -2.912260000 | -1.153806000 |
| 1 | 3.658163000  | -1.232590000 | -1.701310000 |
| 6 | 2.846221000  | -2.382070000 | 1.469701000  |
| 1 | 2.177250000  | -2.038551000 | 2.263215000  |
| 1 | 2.578512000  | -3.412652000 | 1.222963000  |
| 1 | 3.864902000  | -2.392515000 | 1.863215000  |
| 6 | -0.313897000 | -0.286000000 | 3.132990000  |
| 1 | -0.354386000 | 0.648824000  | 3.706625000  |
| 1 | -1.085050000 | -0.946603000 | 3.538646000  |
| 1 | 0.646674000  | -0.754927000 | 3.365994000  |
| 6 | 1.567228000  | 2.402565000  | 0.885595000  |
| 6 | 2.097682000  | 1.398212000  | -1.373451000 |
| 1 | 2.187220000  | 3.126811000  | 0.349964000  |
| 1 | 1.997867000  | 0.419696000  | -1.855242000 |
| 6 | 2.763445000  | -1.470210000 | 0.259431000  |
| 1 | 3.047079000  | -0.467574000 | 0.590297000  |
| 6 | 0.783557000  | -2.597338000 | -0.785453000 |
| 1 | 1.608973000  | -3.315150000 | -0.776021000 |
| 6 | 0.354975000  | -2.433854000 | -2.228872000 |
| 1 | 1.201003000  | -2.113108000 | -2.842110000 |
| 1 | -0.008939000 | -3.386085000 | -2.622515000 |
| 1 | -0.443937000 | -1.693179000 | -2.338640000 |
| 6 | -0.300274000 | -3.190123000 | 0.096245000  |
| 1 | 0.046205000  | -3.312531000 | 1.124919000  |
| 1 | -1.198028000 | -2.572774000 | 0.112717000  |
| 1 | -0.582304000 | -4.172718000 | -0.288604000 |
| 5 | -2.070781000 | 0.199614000  | -1.536102000 |
| 6 | -3.803348000 | -1.619810000 | -0.950975000 |
| 1 | -4.543486000 | -1.985196000 | -0.228006000 |
| 1 | -4.254067000 | -1.667444000 | -1.944204000 |
| 1 | -2.950834000 | -2.303187000 | -0.948660000 |
| 6 | -4.606094000 | 0.710083000  | -0.804545000 |
| 1 | -4.820625000 | 0.837326000  | -1.867850000 |
| 1 | -5.495847000 | 0.267430000  | -0.341280000 |
| 1 | -4.451630000 | 1.699574000  | -0.372700000 |
| 1 | -2.074718000 | 1.360886000  | -2.209310000 |
| 6 | -2.275900000 | 2.593538000  | -1.500039000 |
| 1 | -2.335623000 | 2.564510000  | -0.411804000 |
| 1 | -1.413905000 | 3.177084000  | -1.823852000 |
| 1 | -3.195307000 | 2.987573000  | -1.932768000 |

6TS<sub>σ</sub><sup>C-H</sup> (TE= -1541.114966)

|    |              |              |              |
|----|--------------|--------------|--------------|
| 6  | -0.601783000 | -0.469834000 | -1.091492000 |
| 7  | -0.300048000 | 0.140052000  | 0.136876000  |
| 7  | -1.906477000 | -0.747515000 | -1.176048000 |
| 6  | -2.346022000 | -1.924844000 | -1.898359000 |
| 1  | -3.396098000 | -1.833009000 | -2.172235000 |
| 1  | -1.755672000 | -2.019157000 | -2.809046000 |
| 1  | -2.219144000 | -2.820731000 | -1.282040000 |
| 15 | 1.311781000  | -0.061236000 | -0.268264000 |
| 6  | 0.599835000  | -0.684449000 | -1.738674000 |
| 7  | 2.139857000  | 1.349716000  | -0.218431000 |
| 7  | 2.155103000  | -1.124007000 | 0.652345000  |
| 6  | 0.787229000  | -3.223130000 | 0.278184000  |
| 1  | 0.090129000  | -2.842962000 | 1.028945000  |
| 1  | 0.358596000  | -3.044014000 | -0.709258000 |
| 1  | 0.873612000  | -4.303582000 | 0.411126000  |
| 6  | 3.093778000  | -2.952898000 | -0.713231000 |
| 1  | 4.102746000  | -2.582631000 | -0.519365000 |
| 1  | 3.143059000  | -4.037447000 | -0.833195000 |
| 1  | 2.751916000  | -2.529918000 | -1.660046000 |
| 6  | 4.046179000  | -1.078661000 | 2.259619000  |
| 1  | 4.706469000  | -0.750217000 | 1.453814000  |
| 1  | 4.388060000  | -0.616597000 | 3.188037000  |
| 1  | 4.162199000  | -2.158905000 | 2.376526000  |
| 6  | 1.663683000  | -1.142688000 | 3.086721000  |
| 1  | 0.642639000  | -0.796844000 | 2.893183000  |
| 1  | 1.649328000  | -2.232519000 | 3.175825000  |
| 1  | 1.983562000  | -0.739692000 | 4.049829000  |
| 6  | 4.507280000  | 1.983502000  | 0.172879000  |
| 1  | 5.523401000  | 1.831963000  | -0.196788000 |
| 1  | 4.340471000  | 3.061712000  | 0.229321000  |
| 1  | 4.448331000  | 1.577509000  | 1.184073000  |
| 6  | 3.588647000  | 1.870852000  | -2.164449000 |
| 1  | 2.886911000  | 1.358768000  | -2.827072000 |
| 1  | 3.355874000  | 2.938471000  | -2.182590000 |
| 1  | 4.596029000  | 1.747581000  | -2.567209000 |
| 6  | 0.990501000  | -1.237277000 | -3.057559000 |
| 1  | 0.909731000  | -2.330205000 | -3.118518000 |
| 1  | 0.378202000  | -0.821756000 | -3.862581000 |
| 1  | 2.027274000  | -0.984186000 | -3.293468000 |
| 6  | 2.159928000  | -2.588642000 | 0.422042000  |
| 6  | 2.607868000  | -0.678899000 | 1.996042000  |
| 1  | 2.591050000  | -3.000100000 | 1.337976000  |
| 1  | 2.570470000  | 0.413447000  | 1.970081000  |
| 6  | 3.516869000  | 1.309293000  | -0.756915000 |
| 1  | 3.786795000  | 0.245836000  | -0.809478000 |

|   |              |              |              |
|---|--------------|--------------|--------------|
| 6 | 1.510818000  | 2.681965000  | -0.037063000 |
| 1 | 2.326686000  | 3.387812000  | -0.219730000 |
| 6 | 1.064510000  | 2.869595000  | 1.398405000  |
| 1 | 1.911004000  | 2.760527000  | 2.081021000  |
| 1 | 0.643113000  | 3.867841000  | 1.534677000  |
| 1 | 0.290531000  | 2.150637000  | 1.678470000  |
| 6 | 0.422998000  | 2.992554000  | -1.047924000 |
| 1 | 0.779699000  | 2.839734000  | -2.068515000 |
| 1 | -0.465389000 | 2.381548000  | -0.886984000 |
| 1 | 0.117653000  | 4.036176000  | -0.944138000 |
| 5 | -1.484144000 | 0.137062000  | 1.026505000  |
| 7 | -2.458753000 | -0.556763000 | 0.146029000  |
| 6 | -3.829921000 | -0.291590000 | 0.199095000  |
| 6 | -4.480730000 | -0.461453000 | 1.419679000  |
| 6 | -4.553051000 | 0.178098000  | -0.893367000 |
| 6 | -5.819257000 | -0.149205000 | 1.544268000  |
| 1 | -3.905544000 | -0.820050000 | 2.265633000  |
| 6 | -5.899028000 | 0.475667000  | -0.760313000 |
| 1 | -4.046576000 | 0.355954000  | -1.834742000 |
| 6 | -6.541429000 | 0.318250000  | 0.455009000  |
| 1 | -6.307186000 | -0.276576000 | 2.504127000  |
| 1 | -6.445145000 | 0.852350000  | -1.618070000 |
| 1 | -7.593095000 | 0.558447000  | 0.555320000  |
| 1 | -1.900147000 | 1.207886000  | 1.640272000  |
| 6 | -2.495890000 | 2.567953000  | 0.981650000  |
| 1 | -3.493356000 | 2.629837000  | 1.423948000  |
| 1 | -1.859127000 | 3.387612000  | 1.323336000  |
| 1 | -2.570903000 | 2.567332000  | -0.109897000 |

**7TS<sub>σ</sub><sup>C-H</sup> (TE= -639.259172)**

|   |              |              |              |
|---|--------------|--------------|--------------|
| 6 | 1.475993000  | -0.902587000 | -1.299257000 |
| 6 | 0.140966000  | -0.906838000 | -1.324679000 |
| 1 | 2.195357000  | -1.310031000 | -1.992408000 |
| 1 | -0.457291000 | -1.357165000 | -2.103960000 |
| 6 | 3.040655000  | -0.788013000 | 0.695742000  |
| 6 | 3.267310000  | 0.289168000  | 0.059091000  |
| 7 | 1.889465000  | -0.228698000 | -0.090416000 |
| 7 | -0.430631000 | -0.265971000 | -0.243761000 |
| 5 | 0.623775000  | 0.331122000  | 0.630192000  |
| 6 | -1.809504000 | -0.172760000 | -0.052621000 |
| 6 | -2.728722000 | -0.898294000 | -0.811239000 |
| 6 | -2.296459000 | 0.679852000  | 0.940444000  |
| 6 | -4.087179000 | -0.763537000 | -0.586951000 |
| 1 | -2.392264000 | -1.588217000 | -1.575232000 |
| 6 | -3.654829000 | 0.800843000  | 1.160208000  |
| 1 | -1.582587000 | 1.230266000  | 1.542029000  |

|   |              |              |              |
|---|--------------|--------------|--------------|
| 6 | -4.564490000 | 0.085727000  | 0.397282000  |
| 1 | -4.780339000 | -1.339946000 | -1.189598000 |
| 1 | -4.006369000 | 1.469011000  | 1.938659000  |
| 1 | -5.629352000 | 0.186354000  | 0.569009000  |
| 6 | 3.942567000  | 1.472918000  | -0.453364000 |
| 1 | 3.487358000  | 2.375852000  | -0.040461000 |
| 1 | 4.998479000  | 1.451584000  | -0.188099000 |
| 1 | 3.847714000  | 1.521302000  | -1.540636000 |
| 6 | 3.132901000  | -1.966615000 | 1.536445000  |
| 1 | 4.128991000  | -2.066538000 | 1.964369000  |
| 1 | 2.398256000  | -1.889717000 | 2.342593000  |
| 1 | 2.902359000  | -2.862114000 | 0.953562000  |
| 1 | 0.660231000  | 1.634587000  | 0.828908000  |
| 6 | 0.643119000  | 2.453351000  | -0.354656000 |
| 1 | 1.047094000  | 2.028412000  | -1.273515000 |
| 1 | -0.403267000 | 2.726961000  | -0.477447000 |
| 1 | 1.240940000  | 3.297188000  | -0.008163000 |

**9TS<sub>o</sub><sup>C-H</sup>** (TE= -1409.533453)

|    |              |              |              |
|----|--------------|--------------|--------------|
| 6  | -1.211692000 | 0.000248000  | 1.277791000  |
| 7  | -0.845481000 | 0.016722000  | -0.132511000 |
| 15 | 0.744317000  | -0.024055000 | 0.350602000  |
| 6  | 0.050363000  | 0.001635000  | 1.915495000  |
| 7  | 1.537476000  | -1.360022000 | -0.241749000 |
| 7  | 1.704541000  | 1.228487000  | -0.136101000 |
| 6  | 0.413904000  | 3.131122000  | 0.916486000  |
| 1  | -0.201389000 | 3.207107000  | 0.018337000  |
| 1  | -0.139606000 | 2.550472000  | 1.657082000  |
| 1  | 0.563239000  | 4.138421000  | 1.312627000  |
| 6  | 2.634158000  | 2.375573000  | 1.841209000  |
| 1  | 3.627148000  | 2.004119000  | 1.577100000  |
| 1  | 2.750121000  | 3.344186000  | 2.333100000  |
| 1  | 2.190990000  | 1.686442000  | 2.563100000  |
| 6  | 3.650880000  | 1.690958000  | -1.611612000 |
| 1  | 4.276946000  | 1.102025000  | -0.937268000 |
| 1  | 4.018396000  | 1.544205000  | -2.629752000 |
| 1  | 3.789589000  | 2.747482000  | -1.369313000 |
| 6  | 1.297756000  | 2.097137000  | -2.421738000 |
| 1  | 0.275692000  | 1.709216000  | -2.409565000 |
| 1  | 1.268990000  | 3.143850000  | -2.104428000 |
| 1  | 1.660821000  | 2.074613000  | -3.451755000 |
| 6  | 3.880404000  | -1.950569000 | -0.806434000 |
| 1  | 4.890044000  | -2.017027000 | -0.394980000 |
| 1  | 3.646474000  | -2.921517000 | -1.250482000 |
| 1  | 3.886472000  | -1.206330000 | -1.604866000 |
| 6  | 2.917071000  | -2.594072000 | 1.422548000  |

|   |              |              |              |
|---|--------------|--------------|--------------|
| 1 | 2.217936000  | -2.310992000 | 2.212756000  |
| 1 | 2.650153000  | -3.595594000 | 1.074930000  |
| 1 | 3.918418000  | -2.654620000 | 1.854506000  |
| 6 | 0.443683000  | -0.079286000 | 3.340773000  |
| 1 | 0.312224000  | 0.865888000  | 3.886283000  |
| 1 | -0.134433000 | -0.838444000 | 3.879493000  |
| 1 | 1.497085000  | -0.355960000 | 3.446097000  |
| 6 | 1.763085000  | 2.508045000  | 0.608105000  |
| 6 | 2.197540000  | 1.263476000  | -1.530210000 |
| 1 | 2.272098000  | 3.197084000  | -0.071872000 |
| 1 | 2.141965000  | 0.230765000  | -1.883909000 |
| 6 | 2.896538000  | -1.582683000 | 0.289222000  |
| 1 | 3.216281000  | -0.618841000 | 0.705691000  |
| 6 | 0.855081000  | -2.532585000 | -0.827120000 |
| 1 | 1.628337000  | -3.306613000 | -0.864196000 |
| 6 | 0.430549000  | -2.257769000 | -2.256138000 |
| 1 | 1.291471000  | -1.970841000 | -2.865381000 |
| 1 | -0.015329000 | -3.152818000 | -2.697676000 |
| 1 | -0.316621000 | -1.457678000 | -2.304040000 |
| 6 | -0.277666000 | -3.099171000 | 0.014196000  |
| 1 | 0.040372000  | -3.275893000 | 1.043463000  |
| 1 | -1.139976000 | -2.430502000 | 0.034743000  |
| 1 | -0.602614000 | -4.051719000 | -0.411816000 |
| 5 | -1.982994000 | 0.086885000  | -1.027951000 |
| 6 | -2.556644000 | -0.046214000 | 1.394519000  |
| 1 | -3.208184000 | -0.078385000 | 2.252934000  |
| 6 | -4.256218000 | -1.010376000 | -0.240409000 |
| 6 | -4.549810000 | 0.228027000  | -0.152337000 |
| 7 | -3.123743000 | -0.079713000 | 0.043851000  |
| 6 | -4.310462000 | -2.458210000 | -0.351813000 |
| 1 | -5.332796000 | -2.811123000 | -0.479701000 |
| 1 | -3.706395000 | -2.788524000 | -1.201531000 |
| 1 | -3.890297000 | -2.908614000 | 0.552327000  |
| 6 | -5.344747000 | 1.445625000  | -0.053368000 |
| 1 | -5.134457000 | 2.120766000  | -0.885669000 |
| 1 | -6.407855000 | 1.208436000  | -0.042046000 |
| 1 | -5.088197000 | 1.974586000  | 0.868133000  |
| 1 | -2.235896000 | 1.054537000  | -1.887028000 |
| 6 | -2.447039000 | 2.486568000  | -1.459190000 |
| 1 | -1.579777000 | 3.025199000  | -1.843778000 |
| 1 | -3.350714000 | 2.757177000  | -2.009383000 |
| 1 | -2.566463000 | 2.648655000  | -0.385812000 |

**II-TS<sub>o</sub><sup>C-H</sup> (TE= -639.483317)**

|   |             |              |             |
|---|-------------|--------------|-------------|
| 6 | 0.741029000 | -1.340687000 | 0.358587000 |
| 6 | 2.223897000 | -0.951173000 | 0.269685000 |

|   |              |              |              |
|---|--------------|--------------|--------------|
| 6 | 2.288618000  | 0.393616000  | -0.471989000 |
| 6 | 0.918398000  | 0.967750000  | -0.248024000 |
| 7 | 0.084732000  | -0.042790000 | 0.026447000  |
| 1 | 2.813896000  | -1.731847000 | -0.219089000 |
| 1 | 2.626605000  | -0.822447000 | 1.279008000  |
| 6 | -1.318669000 | 0.118871000  | -0.080047000 |
| 6 | -1.869080000 | 0.381740000  | -1.328956000 |
| 6 | -3.233059000 | 0.555872000  | -1.468194000 |
| 6 | -4.061222000 | 0.466377000  | -0.359573000 |
| 6 | -3.515504000 | 0.213010000  | 0.886962000  |
| 6 | -2.147966000 | 0.043658000  | 1.031563000  |
| 1 | -1.203595000 | 0.447370000  | -2.183780000 |
| 1 | -3.653270000 | 0.757939000  | -2.446578000 |
| 1 | -5.130989000 | 0.600973000  | -0.467566000 |
| 1 | -4.156167000 | 0.158707000  | 1.759417000  |
| 1 | -1.717057000 | -0.120630000 | 2.011656000  |
| 6 | 2.414919000  | 0.183751000  | -1.986307000 |
| 1 | 2.462237000  | 1.146792000  | -2.499557000 |
| 1 | 3.328793000  | -0.373747000 | -2.212099000 |
| 1 | 1.568184000  | -0.369305000 | -2.397870000 |
| 6 | 3.440432000  | 1.267536000  | -0.018932000 |
| 1 | 4.390844000  | 0.828269000  | -0.335037000 |
| 1 | 3.366494000  | 2.261754000  | -0.468002000 |
| 1 | 3.463519000  | 1.385604000  | 1.064504000  |
| 6 | 0.333223000  | -2.399256000 | -0.652607000 |
| 1 | -0.747259000 | -2.563272000 | -0.626241000 |
| 1 | 0.609273000  | -2.116559000 | -1.670110000 |
| 1 | 0.821666000  | -3.347656000 | -0.417554000 |
| 6 | 0.392759000  | -1.821515000 | 1.757885000  |
| 1 | 1.024193000  | -2.677045000 | 2.012531000  |
| 1 | 0.569928000  | -1.035844000 | 2.496345000  |
| 1 | -0.647456000 | -2.146049000 | 1.829432000  |
| 1 | 0.753927000  | 2.011298000  | 0.247682000  |
| 6 | 1.022726000  | 2.144385000  | 1.775970000  |
| 1 | -0.012457000 | 2.297918000  | 2.083685000  |
| 1 | 1.473449000  | 1.311114000  | 2.312520000  |
| 1 | 1.619107000  | 3.052573000  | 1.865441000  |



Cartesian coordinates of the transition states involved in the activation of C-H bond of CH<sub>4</sub> by **4-7**, **9** and **II** via inverted  $\pi_{\text{CH}_2}$  approach, along with their total energies (in hartrees) including zero point vibrational correction.

**4TS $\pi^{\text{C-H}}$  (inverted) (TE= -1753.868017)**

|    |              |              |              |
|----|--------------|--------------|--------------|
| 6  | 0.809244000  | -0.474412000 | 1.132891000  |
| 6  | 2.782721000  | -0.912474000 | -0.003313000 |
| 7  | 0.470912000  | -0.335937000 | -0.232807000 |
| 7  | 2.091752000  | -0.733814000 | 1.305264000  |
| 6  | 2.647462000  | -1.140195000 | 2.568758000  |
| 1  | 3.471359000  | -0.488512000 | 2.872472000  |
| 1  | 1.884736000  | -1.107225000 | 3.348561000  |
| 1  | 3.037088000  | -2.159949000 | 2.490160000  |
| 15 | 4.059343000  | 0.156144000  | -0.379008000 |
| 6  | 5.327835000  | 0.332746000  | 0.916012000  |
| 1  | 6.205176000  | 0.853356000  | 0.527455000  |
| 1  | 4.927229000  | 0.909718000  | 1.751669000  |
| 1  | 5.623081000  | -0.654967000 | 1.273199000  |
| 6  | 3.797383000  | 1.900493000  | -0.878813000 |
| 1  | 4.715736000  | 2.347498000  | -1.266353000 |
| 1  | 3.027204000  | 1.916369000  | -1.652927000 |
| 1  | 3.455134000  | 2.479763000  | -0.019634000 |
| 6  | 4.962087000  | -0.514301000 | -1.787037000 |
| 1  | 5.796937000  | 0.138934000  | -2.052693000 |
| 1  | 5.329351000  | -1.510173000 | -1.537502000 |
| 1  | 4.262969000  | -0.592402000 | -2.621014000 |
| 15 | -1.068247000 | -0.000642000 | 0.281358000  |
| 6  | -0.382601000 | -0.292461000 | 1.847115000  |
| 7  | -1.577733000 | 1.515125000  | -0.163470000 |
| 7  | -2.298556000 | -0.988319000 | -0.211124000 |
| 6  | -1.403647000 | -3.222004000 | 0.538433000  |
| 1  | -0.951587000 | -3.376686000 | -0.443637000 |
| 1  | -0.638074000 | -2.835342000 | 1.214096000  |
| 1  | -1.733472000 | -4.192489000 | 0.916682000  |
| 6  | -3.263857000 | -2.076620000 | 1.794207000  |
| 1  | -4.133466000 | -1.422320000 | 1.695185000  |
| 1  | -3.601079000 | -3.034702000 | 2.196496000  |
| 1  | -2.576699000 | -1.634317000 | 2.517159000  |
| 6  | -4.419983000 | -0.835110000 | -1.493013000 |
| 1  | -4.810888000 | -0.154489000 | -0.733532000 |
| 1  | -4.828224000 | -0.533145000 | -2.460219000 |
| 1  | -4.802885000 | -1.836539000 | -1.281354000 |
| 6  | -2.344489000 | -1.766497000 | -2.568663000 |
| 1  | -1.260583000 | -1.658771000 | -2.640617000 |
| 1  | -2.570443000 | -2.805877000 | -2.314297000 |

|   |              |              |              |
|---|--------------|--------------|--------------|
| 1 | -2.775636000 | -1.566757000 | -3.552123000 |
| 6 | -3.731670000 | 2.638860000  | -0.670152000 |
| 1 | -4.719629000 | 2.856783000  | -0.258110000 |
| 1 | -3.309728000 | 3.585744000  | -1.015840000 |
| 1 | -3.861396000 | 1.990243000  | -1.538130000 |
| 6 | -2.676875000 | 2.907757000  | 1.586595000  |
| 1 | -2.067137000 | 2.434019000  | 2.358964000  |
| 1 | -2.196144000 | 3.847251000  | 1.301842000  |
| 1 | -3.648190000 | 3.155779000  | 2.020327000  |
| 6 | -0.686566000 | 0.025779000  | 3.266792000  |
| 1 | -0.587562000 | -0.835955000 | 3.937962000  |
| 1 | -0.049763000 | 0.823458000  | 3.671006000  |
| 1 | -1.719792000 | 0.370328000  | 3.367747000  |
| 6 | -2.589864000 | -2.279723000 | 0.451813000  |
| 6 | -2.903530000 | -0.797462000 | -1.546281000 |
| 1 | -3.323358000 | -2.761795000 | -0.200816000 |
| 1 | -2.608719000 | 0.207608000  | -1.858697000 |
| 6 | -2.859916000 | 1.989557000  | 0.390538000  |
| 1 | -3.381124000 | 1.091071000  | 0.744157000  |
| 6 | -0.648362000 | 2.544673000  | -0.672610000 |
| 1 | -1.252110000 | 3.456817000  | -0.724775000 |
| 6 | -0.198150000 | 2.218737000  | -2.082390000 |
| 1 | -1.063157000 | 2.107329000  | -2.741900000 |
| 1 | 0.426081000  | 3.025502000  | -2.475977000 |
| 1 | 0.390878000  | 1.292956000  | -2.112412000 |
| 6 | 0.517787000  | 2.841023000  | 0.255145000  |
| 1 | 0.177989000  | 3.048819000  | 1.271936000  |
| 1 | 1.213894000  | 2.001613000  | 0.288269000  |
| 1 | 1.063896000  | 3.715324000  | -0.108683000 |
| 5 | 1.650317000  | -0.884611000 | -1.118222000 |
| 1 | 1.397285000  | -2.185606000 | -0.824256000 |
| 6 | 1.313167000  | -2.455367000 | -2.060360000 |
| 1 | 2.311549000  | -2.717774000 | -2.400841000 |
| 1 | 0.801651000  | -3.405014000 | -1.762391000 |
| 1 | 0.739930000  | -2.092352000 | -2.909805000 |

**5TS<sub>π</sub><sup>C-H</sup> (inverted)** (TE= -1372.694836)

|    |              |              |              |
|----|--------------|--------------|--------------|
| 6  | 1.528882000  | 0.041933000  | 0.862784000  |
| 6  | 3.427476000  | 0.178857000  | -0.527350000 |
| 7  | 1.000873000  | -0.006833000 | -0.440621000 |
| 7  | 2.851239000  | 0.003494000  | 0.878212000  |
| 6  | 3.603680000  | 0.201023000  | 2.091134000  |
| 1  | 3.795261000  | 1.260234000  | 2.296075000  |
| 1  | 3.061595000  | -0.220986000 | 2.938675000  |
| 1  | 4.564639000  | -0.311207000 | 2.019937000  |
| 15 | -0.496382000 | 0.050801000  | 0.258933000  |

|   |              |              |              |
|---|--------------|--------------|--------------|
| 6 | 0.437699000  | 0.096126000  | 1.727308000  |
| 7 | -1.407925000 | 1.344063000  | -0.205847000 |
| 7 | -1.490866000 | -1.256109000 | 0.060585000  |
| 6 | 0.159145000  | -3.092868000 | 0.580283000  |
| 1 | 0.438858000  | -3.141324000 | -0.474387000 |
| 1 | 0.898700000  | -2.485253000 | 1.106176000  |
| 1 | 0.204970000  | -4.104535000 | 0.989885000  |
| 6 | -1.666822000 | -2.489801000 | 2.208204000  |
| 1 | -2.680625000 | -2.093664000 | 2.303227000  |
| 1 | -1.649369000 | -3.492604000 | 2.641453000  |
| 1 | -0.994442000 | -1.862178000 | 2.793634000  |
| 6 | -3.816019000 | -1.762000000 | -0.635106000 |
| 1 | -4.179324000 | -1.148472000 | 0.192603000  |
| 1 | -4.516322000 | -1.659151000 | -1.467168000 |
| 1 | -3.841230000 | -2.808057000 | -0.319740000 |
| 6 | -1.894644000 | -2.161940000 | -2.216280000 |
| 1 | -0.925277000 | -1.782485000 | -2.548418000 |
| 1 | -1.771180000 | -3.210618000 | -1.932054000 |
| 1 | -2.581695000 | -2.129914000 | -3.064755000 |
| 6 | -3.827084000 | 1.913483000  | -0.058983000 |
| 1 | -4.650416000 | 2.025503000  | 0.649668000  |
| 1 | -3.788243000 | 2.828091000  | -0.655195000 |
| 1 | -4.064938000 | 1.083341000  | -0.726140000 |
| 6 | -2.197716000 | 2.844322000  | 1.605971000  |
| 1 | -1.277006000 | 2.656812000  | 2.162711000  |
| 1 | -2.069461000 | 3.768371000  | 1.036076000  |
| 1 | -3.006986000 | 3.008500000  | 2.320961000  |
| 6 | 0.258339000  | 0.336561000  | 3.182612000  |
| 1 | 0.607593000  | -0.493568000 | 3.809105000  |
| 1 | 0.773343000  | 1.238997000  | 3.530369000  |
| 1 | -0.800198000 | 0.472454000  | 3.419807000  |
| 6 | -1.245141000 | -2.542973000 | 0.753143000  |
| 6 | -2.432870000 | -1.321012000 | -1.075245000 |
| 1 | -1.914354000 | -3.250763000 | 0.256279000  |
| 1 | -2.519478000 | -0.296386000 | -1.440347000 |
| 6 | -2.529656000 | 1.677713000  | 0.693469000  |
| 1 | -2.678854000 | 0.789717000  | 1.325289000  |
| 6 | -0.994682000 | 2.353936000  | -1.201514000 |
| 1 | -1.799874000 | 3.095360000  | -1.180712000 |
| 6 | -0.943037000 | 1.759880000  | -2.594965000 |
| 1 | -1.903494000 | 1.318768000  | -2.874695000 |
| 1 | -0.699267000 | 2.535729000  | -3.324309000 |
| 1 | -0.151775000 | 1.001577000  | -2.660594000 |
| 6 | 0.300754000  | 3.069218000  | -0.863402000 |
| 1 | 0.343664000  | 3.347614000  | 0.191963000  |
| 1 | 1.155057000  | 2.432821000  | -1.101650000 |

|   |             |              |              |
|---|-------------|--------------|--------------|
| 1 | 0.387753000 | 3.978647000  | -1.462494000 |
| 5 | 2.133031000 | -0.120876000 | -1.491746000 |
| 6 | 3.933791000 | 1.615437000  | -0.611546000 |
| 1 | 4.730658000 | 1.822126000  | 0.116822000  |
| 1 | 4.331840000 | 1.797909000  | -1.611092000 |
| 1 | 3.125564000 | 2.330437000  | -0.441398000 |
| 6 | 4.604719000 | -0.760633000 | -0.711719000 |
| 1 | 4.950204000 | -0.706498000 | -1.746663000 |
| 1 | 5.456102000 | -0.489556000 | -0.077475000 |
| 1 | 4.339512000 | -1.799405000 | -0.494979000 |
| 1 | 2.304333000 | -1.456262000 | -1.241763000 |
| 6 | 2.108012000 | -1.719868000 | -2.452052000 |
| 1 | 1.186861000 | -1.582465000 | -3.010030000 |
| 1 | 2.952889000 | -1.595168000 | -3.120069000 |
| 1 | 2.102647000 | -2.797858000 | -2.142030000 |

**6TS $\pi$ <sup>C-H</sup> (inverted)** (TE= -1541.071366)

|    |              |              |              |
|----|--------------|--------------|--------------|
| 6  | 0.626787000  | -0.707144000 | 1.062161000  |
| 7  | 0.302538000  | -0.466943000 | -0.285348000 |
| 7  | 1.895946000  | -1.100669000 | 1.194532000  |
| 6  | 2.296024000  | -2.090091000 | 2.165563000  |
| 1  | 3.350883000  | -1.969275000 | 2.415248000  |
| 1  | 1.702515000  | -1.968820000 | 3.072957000  |
| 1  | 2.139595000  | -3.100029000 | 1.767969000  |
| 15 | -1.170341000 | 0.044515000  | 0.264881000  |
| 6  | -0.505343000 | -0.438156000 | 1.809327000  |
| 7  | -1.422423000 | 1.635362000  | -0.070430000 |
| 7  | -2.513455000 | -0.743937000 | -0.260859000 |
| 6  | -1.890202000 | -3.116439000 | 0.334071000  |
| 1  | -1.434629000 | -3.239151000 | -0.651063000 |
| 1  | -1.101148000 | -2.889960000 | 1.055007000  |
| 1  | -2.342782000 | -4.069109000 | 0.617835000  |
| 6  | -3.603824000 | -1.838472000 | 1.671788000  |
| 1  | -4.393352000 | -1.085425000 | 1.615520000  |
| 1  | -4.046648000 | -2.774633000 | 2.018782000  |
| 1  | -2.873832000 | -1.519752000 | 2.417700000  |
| 6  | -4.588509000 | -0.275770000 | -1.537803000 |
| 1  | -4.909036000 | 0.378462000  | -0.723821000 |
| 1  | -4.951068000 | 0.147651000  | -2.476952000 |
| 1  | -5.080036000 | -1.243353000 | -1.410865000 |
| 6  | -2.601781000 | -1.342837000 | -2.667425000 |
| 1  | -1.509914000 | -1.347412000 | -2.718132000 |
| 1  | -2.944162000 | -2.366694000 | -2.493068000 |
| 1  | -2.986912000 | -1.027759000 | -3.639432000 |
| 6  | -3.423485000 | 3.075198000  | -0.357315000 |
| 1  | -4.308168000 | 3.456090000  | 0.157261000  |

|   |              |              |              |
|---|--------------|--------------|--------------|
| 1 | -2.884022000 | 3.937352000  | -0.756718000 |
| 1 | -3.756261000 | 2.464846000  | -1.198577000 |
| 6 | -2.127864000 | 3.118599000  | 1.793055000  |
| 1 | -1.527439000 | 2.532340000  | 2.492239000  |
| 1 | -1.534254000 | 3.979440000  | 1.475344000  |
| 1 | -3.000816000 | 3.500901000  | 2.326283000  |
| 6 | -0.740538000 | -0.221136000 | 3.259348000  |
| 1 | -0.842811000 | -1.155319000 | 3.823730000  |
| 1 | 0.068060000  | 0.352991000  | 3.725717000  |
| 1 | -1.664220000 | 0.340504000  | 3.422686000  |
| 6 | -2.955764000 | -2.035419000 | 0.316584000  |
| 6 | -3.077487000 | -0.394934000 | -1.584583000 |
| 1 | -3.738235000 | -2.381848000 | -0.363983000 |
| 1 | -2.677727000 | 0.595020000  | -1.818459000 |
| 6 | -2.566215000 | 2.277520000  | 0.607890000  |
| 1 | -3.184435000 | 1.455421000  | 0.994987000  |
| 6 | -0.391993000 | 2.521668000  | -0.664507000 |
| 1 | -0.838925000 | 3.519201000  | -0.607181000 |
| 6 | -0.176745000 | 2.199057000  | -2.128644000 |
| 1 | -1.116975000 | 2.259591000  | -2.683368000 |
| 1 | 0.524445000  | 2.911590000  | -2.569035000 |
| 1 | 0.254738000  | 1.198528000  | -2.253825000 |
| 6 | 0.919313000  | 2.576697000  | 0.102119000  |
| 1 | 0.753741000  | 2.686366000  | 1.176452000  |
| 1 | 1.521310000  | 1.682790000  | -0.069751000 |
| 1 | 1.503254000  | 3.433841000  | -0.240029000 |
| 5 | 1.398867000  | -1.099448000 | -1.172818000 |
| 7 | 2.510564000  | -1.159027000 | -0.125263000 |
| 6 | 3.671191000  | -0.385103000 | -0.190489000 |
| 6 | 4.341634000  | -0.303364000 | -1.416496000 |
| 6 | 4.220386000  | 0.290989000  | 0.901441000  |
| 6 | 5.499881000  | 0.434486000  | -1.542177000 |
| 1 | 3.906020000  | -0.819254000 | -2.264269000 |
| 6 | 5.386261000  | 1.028883000  | 0.762202000  |
| 1 | 3.715045000  | 0.270432000  | 1.858701000  |
| 6 | 6.038571000  | 1.109888000  | -0.454208000 |
| 1 | 5.992023000  | 0.484120000  | -2.507818000 |
| 1 | 5.780557000  | 1.555077000  | 1.625312000  |
| 1 | 6.949644000  | 1.687364000  | -0.556740000 |
| 1 | 0.990917000  | -2.388843000 | -0.873683000 |
| 6 | 1.065325000  | -2.651987000 | -2.111619000 |
| 1 | 0.583811000  | -3.628424000 | -1.845100000 |
| 1 | 0.491151000  | -2.287764000 | -2.960056000 |
| 1 | 2.074949000  | -2.883896000 | -2.437062000 |

**7TS<sub>π</sub><sup>C-H</sup> (inverted) (TE= -639.222716)**

|   |              |              |              |
|---|--------------|--------------|--------------|
| 6 | -1.465107000 | -1.344996000 | 0.928337000  |
| 6 | -0.123291000 | -1.353608000 | 0.956215000  |
| 1 | -2.172082000 | -2.055970000 | 1.328780000  |
| 1 | 0.468900000  | -2.139438000 | 1.406014000  |
| 6 | -3.013858000 | -0.500690000 | -0.894898000 |
| 6 | -3.311828000 | 0.195584000  | 0.132279000  |
| 7 | -1.915073000 | -0.238995000 | 0.106301000  |
| 7 | 0.450750000  | -0.295988000 | 0.303044000  |
| 5 | -0.648486000 | 0.629949000  | -0.234506000 |
| 6 | 1.815851000  | -0.165578000 | 0.100626000  |
| 6 | 2.763294000  | -0.914717000 | 0.808600000  |
| 6 | 2.282421000  | 0.771742000  | -0.828392000 |
| 6 | 4.114414000  | -0.740768000 | 0.578291000  |
| 1 | 2.447240000  | -1.631592000 | 1.557003000  |
| 6 | 3.636299000  | 0.931508000  | -1.052376000 |
| 1 | 1.544443000  | 1.336707000  | -1.388778000 |
| 6 | 4.568655000  | 0.181144000  | -0.353028000 |
| 1 | 4.824823000  | -1.334662000 | 1.143302000  |
| 1 | 3.967160000  | 1.656833000  | -1.788148000 |
| 1 | 5.629756000  | 0.315324000  | -0.524851000 |
| 6 | -4.089991000 | 1.010528000  | 1.059819000  |
| 1 | -3.710910000 | 2.035151000  | 1.089663000  |
| 1 | -5.137669000 | 1.035746000  | 0.763842000  |
| 1 | -4.017448000 | 0.601513000  | 2.070879000  |
| 6 | -2.975429000 | -1.200899000 | -2.161651000 |
| 1 | -3.900931000 | -1.083640000 | -2.723142000 |
| 1 | -2.141942000 | -0.796351000 | -2.746463000 |
| 1 | -2.788245000 | -2.266113000 | -1.999452000 |
| 1 | -0.792895000 | 1.268004000  | 0.985262000  |
| 6 | -0.668734000 | 2.357502000  | 0.382549000  |
| 1 | -0.687689000 | 2.813991000  | 1.403880000  |
| 1 | 0.271094000  | 2.694849000  | -0.050313000 |
| 1 | -1.507092000 | 2.784266000  | -0.158601000 |

**9TS<sub>π</sub><sup>C-H</sup> (inverted) (TE= -1409.488243)**

|    |              |              |              |
|----|--------------|--------------|--------------|
| 6  | -1.170660000 | -0.103070000 | 1.314341000  |
| 7  | -0.783369000 | -0.437806000 | -0.040102000 |
| 15 | 0.747271000  | 0.009660000  | 0.375954000  |
| 6  | 0.067773000  | 0.183627000  | 1.942047000  |
| 7  | 1.860903000  | -1.181750000 | 0.037641000  |
| 7  | 1.408835000  | 1.340185000  | -0.374357000 |
| 6  | -0.454185000 | 2.942638000  | 0.200378000  |
| 1  | -1.016273000 | 2.533080000  | -0.643488000 |
| 1  | -0.828074000 | 2.471547000  | 1.112077000  |
| 1  | -0.655831000 | 4.015066000  | 0.262916000  |

|   |              |              |              |
|---|--------------|--------------|--------------|
| 6 | 1.846298000  | 3.186390000  | 1.208029000  |
| 1 | 2.916367000  | 3.086464000  | 1.011562000  |
| 1 | 1.633572000  | 4.236104000  | 1.425872000  |
| 1 | 1.607901000  | 2.605604000  | 2.100055000  |
| 6 | 3.261115000  | 1.967854000  | -1.898551000 |
| 1 | 3.978958000  | 1.691038000  | -1.122606000 |
| 1 | 3.706166000  | 1.741612000  | -2.870445000 |
| 1 | 3.114983000  | 3.050332000  | -1.854660000 |
| 6 | 0.943421000  | 1.560584000  | -2.807459000 |
| 1 | 0.020403000  | 0.985192000  | -2.672447000 |
| 1 | 0.685384000  | 2.623613000  | -2.786020000 |
| 1 | 1.349912000  | 1.344047000  | -3.798559000 |
| 6 | 4.311708000  | -1.285830000 | -0.323543000 |
| 1 | 5.275659000  | -1.048909000 | 0.132318000  |
| 1 | 4.336322000  | -2.342767000 | -0.601832000 |
| 1 | 4.212868000  | -0.697265000 | -1.237580000 |
| 6 | 3.345164000  | -1.774757000 | 1.943181000  |
| 1 | 2.534226000  | -1.545110000 | 2.637780000  |
| 1 | 3.344202000  | -2.852772000 | 1.760066000  |
| 1 | 4.294510000  | -1.525711000 | 2.422765000  |
| 6 | 0.368921000  | 0.721909000  | 3.288025000  |
| 1 | -0.113453000 | 1.691706000  | 3.489822000  |
| 1 | 0.049701000  | 0.042783000  | 4.086486000  |
| 1 | 1.444167000  | 0.869114000  | 3.424602000  |
| 6 | 1.036978000  | 2.716499000  | 0.016164000  |
| 6 | 1.960663000  | 1.202976000  | -1.739021000 |
| 1 | 1.335348000  | 3.336352000  | -0.834349000 |
| 1 | 2.193299000  | 0.141925000  | -1.852422000 |
| 6 | 3.186432000  | -0.990778000 | 0.651749000  |
| 1 | 3.246353000  | 0.076796000  | 0.905437000  |
| 6 | 1.495586000  | -2.549336000 | -0.368570000 |
| 1 | 2.423216000  | -3.125225000 | -0.282738000 |
| 6 | 1.094906000  | -2.569230000 | -1.831753000 |
| 1 | 1.940345000  | -2.289858000 | -2.465617000 |
| 1 | 0.752753000  | -3.562996000 | -2.132565000 |
| 1 | 0.286390000  | -1.858968000 | -2.019950000 |
| 6 | 0.481886000  | -3.240324000 | 0.530569000  |
| 1 | 0.795336000  | -3.205237000 | 1.575228000  |
| 1 | -0.504571000 | -2.779474000 | 0.464216000  |
| 1 | 0.390254000  | -4.288821000 | 0.235858000  |
| 5 | -1.990985000 | -0.536133000 | -0.945423000 |
| 6 | -2.518280000 | -0.029305000 | 1.438077000  |
| 1 | -3.120074000 | 0.342894000  | 2.254474000  |
| 6 | -4.551826000 | -0.380617000 | -0.011698000 |
| 6 | -4.209845000 | 0.833119000  | -0.232485000 |
| 7 | -3.117139000 | -0.113777000 | 0.100715000  |

|   |              |              |              |
|---|--------------|--------------|--------------|
| 6 | -5.372367000 | -1.569313000 | 0.197985000  |
| 1 | -5.061192000 | -2.061159000 | 1.124165000  |
| 1 | -6.427558000 | -1.309700000 | 0.274418000  |
| 1 | -5.250651000 | -2.291299000 | -0.613952000 |
| 6 | -4.208229000 | 2.257996000  | -0.512374000 |
| 1 | -3.537333000 | 2.452995000  | -1.354417000 |
| 1 | -5.203643000 | 2.628241000  | -0.753278000 |
| 1 | -3.824675000 | 2.805650000  | 0.353880000  |
| 1 | -2.238274000 | -1.853577000 | -0.609410000 |
| 6 | -2.450643000 | -2.060134000 | -1.850779000 |
| 1 | -1.756002000 | -2.055280000 | -2.686031000 |
| 1 | -2.524130000 | -3.140439000 | -1.554515000 |
| 1 | -3.434486000 | -1.775161000 | -2.212468000 |

**II-TS<sub>π</sub><sup>C-H</sup> (inverted) (TE= -639.448690)**

|   |              |              |              |
|---|--------------|--------------|--------------|
| 6 | 0.776206000  | 1.423576000  | -0.117489000 |
| 6 | 2.251005000  | 0.994379000  | 0.046800000  |
| 6 | 2.254609000  | -0.502301000 | 0.399509000  |
| 6 | 0.939022000  | -0.988886000 | -0.190509000 |
| 7 | 0.069836000  | 0.106812000  | -0.141682000 |
| 1 | 2.764729000  | 1.615509000  | 0.787463000  |
| 1 | 2.780445000  | 1.129930000  | -0.903622000 |
| 6 | -1.303059000 | -0.084987000 | -0.008347000 |
| 6 | -1.789537000 | -1.351015000 | 0.347669000  |
| 6 | -3.143142000 | -1.584361000 | 0.483325000  |
| 6 | -4.068186000 | -0.575780000 | 0.261500000  |
| 6 | -3.601739000 | 0.674339000  | -0.103749000 |
| 6 | -2.247124000 | 0.921136000  | -0.244318000 |
| 1 | -1.067315000 | -2.138243000 | 0.527963000  |
| 1 | -3.479178000 | -2.574879000 | 0.770946000  |
| 1 | -5.130063000 | -0.763010000 | 0.364646000  |
| 1 | -4.301809000 | 1.480649000  | -0.293990000 |
| 1 | -1.934289000 | 1.908621000  | -0.550488000 |
| 6 | 2.164170000  | -0.713872000 | 1.909307000  |
| 1 | 2.194678000  | -1.780670000 | 2.141071000  |
| 1 | 2.997720000  | -0.220297000 | 2.419518000  |
| 1 | 1.231102000  | -0.316128000 | 2.314462000  |
| 6 | 3.489392000  | -1.206909000 | -0.121611000 |
| 1 | 4.384484000  | -0.806789000 | 0.361890000  |
| 1 | 3.445166000  | -2.278364000 | 0.090827000  |
| 1 | 3.614592000  | -1.075286000 | -1.200917000 |
| 6 | 0.345421000  | 2.284673000  | 1.061350000  |
| 1 | -0.701690000 | 2.580851000  | 1.012087000  |
| 1 | 0.501183000  | 1.758841000  | 2.005540000  |
| 1 | 0.947793000  | 3.196048000  | 1.079852000  |
| 6 | 0.617322000  | 2.181123000  | -1.430566000 |



|   |              |              |              |
|---|--------------|--------------|--------------|
| 1 | 1.312218000  | 3.025146000  | -1.458440000 |
| 1 | 0.851530000  | 1.529544000  | -2.277765000 |
| 1 | -0.388249000 | 2.576084000  | -1.577588000 |
| 1 | 1.405135000  | -0.802597000 | -1.413955000 |
| 6 | 0.912703000  | -1.873094000 | -1.796222000 |
| 1 | -0.154464000 | -2.078354000 | -1.788700000 |
| 1 | 1.163029000  | -1.542342000 | -2.828106000 |
| 1 | 1.492014000  | -2.760080000 | -1.570815000 |

Cartesian coordinates of the transition states involved in the activation of C-F bond of C<sub>6</sub>H<sub>5</sub>F by **4-7**, **9** and **IIIa**, along with their total energies (in hartrees) including zero point vibrational correction.

**4TS<sup>C-F</sup>** (TE= -2044.789841)

|    |              |              |              |
|----|--------------|--------------|--------------|
| 6  | 0.053330000  | -1.830065000 | -0.553082000 |
| 6  | 2.241413000  | -1.213140000 | -0.636463000 |
| 7  | 0.115495000  | -0.452675000 | -0.268873000 |
| 7  | 1.267761000  | -2.319263000 | -0.722653000 |
| 6  | 1.533230000  | -3.640275000 | -1.225307000 |
| 1  | 2.121433000  | -3.578989000 | -2.146029000 |
| 1  | 2.089399000  | -4.245209000 | -0.501175000 |
| 1  | 0.596347000  | -4.153749000 | -1.442774000 |
| 15 | 3.761120000  | -1.491962000 | 0.079176000  |
| 6  | 4.794641000  | -2.743809000 | -0.728164000 |
| 1  | 5.779252000  | -2.770159000 | -0.256898000 |
| 1  | 4.344601000  | -3.733438000 | -0.645471000 |
| 1  | 4.902476000  | -2.491993000 | -1.783794000 |
| 6  | 3.753425000  | -2.044240000 | 1.810294000  |
| 1  | 4.756700000  | -2.283570000 | 2.169600000  |
| 1  | 3.321016000  | -1.246004000 | 2.416982000  |
| 1  | 3.119398000  | -2.929617000 | 1.899674000  |
| 6  | 4.737399000  | 0.005505000  | 0.045013000  |
| 1  | 5.675918000  | -0.168371000 | 0.575494000  |
| 1  | 4.944646000  | 0.278269000  | -0.989465000 |
| 1  | 4.171040000  | 0.812844000  | 0.511604000  |
| 15 | -1.549113000 | -0.524457000 | -0.059428000 |
| 6  | -1.300668000 | -2.175875000 | -0.536346000 |
| 7  | -1.958257000 | -0.148817000 | 1.498103000  |
| 7  | -2.522466000 | 0.395715000  | -1.011368000 |
| 6  | -1.728237000 | -0.290336000 | -3.295263000 |
| 1  | -1.010550000 | 0.531566000  | -3.268550000 |
| 1  | -1.208914000 | -1.205456000 | -3.004786000 |
| 1  | -2.078340000 | -0.409614000 | -4.323232000 |
| 6  | -3.918666000 | -1.147546000 | -2.378856000 |
| 1  | -4.751876000 | -0.920709000 | -1.708977000 |
| 1  | -4.320248000 | -1.290778000 | -3.384691000 |

|   |              |              |              |
|---|--------------|--------------|--------------|
| 1 | -3.466880000 | -2.088985000 | -2.066526000 |
| 6 | -4.311860000 | 2.056378000  | -0.586389000 |
| 1 | -4.801988000 | 1.373108000  | 0.108786000  |
| 1 | -4.498131000 | 3.077741000  | -0.246595000 |
| 1 | -4.792386000 | 1.947898000  | -1.562364000 |
| 6 | -2.160304000 | 2.781409000  | -1.636194000 |
| 1 | -1.102126000 | 2.558730000  | -1.771896000 |
| 1 | -2.642707000 | 2.774554000  | -2.616932000 |
| 1 | -2.245896000 | 3.796892000  | -1.242765000 |
| 6 | -3.952290000 | 0.724821000  | 2.685634000  |
| 1 | -5.025918000 | 0.570781000  | 2.815302000  |
| 1 | -3.512655000 | 0.791708000  | 3.683528000  |
| 1 | -3.802307000 | 1.683138000  | 2.186172000  |
| 6 | -3.519864000 | -1.744082000 | 2.611908000  |
| 1 | -3.110270000 | -2.570431000 | 2.027217000  |
| 1 | -3.019759000 | -1.733613000 | 3.583525000  |
| 1 | -4.578557000 | -1.943202000 | 2.791786000  |
| 6 | -2.024836000 | -3.471836000 | -0.495215000 |
| 1 | -2.067806000 | -3.981793000 | -1.465507000 |
| 1 | -1.582265000 | -4.176619000 | 0.220010000  |
| 1 | -3.062048000 | -3.322927000 | -0.183012000 |
| 6 | -2.909340000 | -0.017729000 | -2.383525000 |
| 6 | -2.816605000 | 1.808945000  | -0.673897000 |
| 1 | -3.425355000 | 0.856414000  | -2.788318000 |
| 1 | -2.379417000 | 1.973688000  | 0.316634000  |
| 6 | -3.359003000 | -0.420300000 | 1.884802000  |
| 1 | -3.919887000 | -0.495248000 | 0.944561000  |
| 6 | -0.984890000 | -0.050896000 | 2.614162000  |
| 1 | -1.614958000 | -0.008038000 | 3.507486000  |
| 6 | -0.203546000 | 1.242817000  | 2.548374000  |
| 1 | -0.880983000 | 2.100409000  | 2.508960000  |
| 1 | 0.428282000  | 1.348067000  | 3.434420000  |
| 1 | 0.458211000  | 1.265602000  | 1.674847000  |
| 6 | -0.080010000 | -1.261516000 | 2.780781000  |
| 1 | -0.647084000 | -2.195047000 | 2.772717000  |
| 1 | 0.677093000  | -1.305318000 | 1.996358000  |
| 1 | 0.442362000  | -1.189156000 | 3.737963000  |
| 6 | 1.754966000  | 2.479629000  | -0.864988000 |
| 6 | 1.018970000  | 3.232402000  | 0.067936000  |
| 6 | 3.120798000  | 2.776359000  | -1.020153000 |
| 6 | 1.686331000  | 3.942580000  | 1.037895000  |
| 1 | -0.060414000 | 3.132026000  | 0.096692000  |
| 6 | 3.771339000  | 3.500646000  | -0.049207000 |
| 1 | 3.656083000  | 2.335371000  | -1.853555000 |
| 6 | 3.076964000  | 4.043194000  | 1.032088000  |
| 1 | 3.594726000  | 4.612357000  | 1.794271000  |

|   |             |             |              |
|---|-------------|-------------|--------------|
| 9 | 1.097860000 | 2.087757000 | -2.002237000 |
| 5 | 1.511892000 | 0.079957000 | -0.256520000 |
| 1 | 4.843333000 | 3.654129000 | -0.133483000 |
| 1 | 1.113241000 | 4.436458000 | 1.817234000  |

**5TS<sup>C-F</sup>** (TE= -1663.604788)

|    |              |              |              |
|----|--------------|--------------|--------------|
| 6  | -0.225404000 | 1.937562000  | -0.707015000 |
| 6  | 2.075407000  | 2.111669000  | -0.351804000 |
| 7  | 0.231460000  | 0.664488000  | -0.264000000 |
| 7  | 0.786236000  | 2.769430000  | -0.822604000 |
| 6  | 0.650825000  | 4.169977000  | -1.127193000 |
| 1  | -0.314283000 | 4.359341000  | -1.596999000 |
| 1  | 0.724320000  | 4.787470000  | -0.226425000 |
| 1  | 1.432613000  | 4.484537000  | -1.821770000 |
| 15 | -1.380039000 | 0.195801000  | -0.206691000 |
| 6  | -1.600109000 | 1.818685000  | -0.812314000 |
| 7  | -1.673845000 | -1.136700000 | -1.120588000 |
| 7  | -1.944359000 | -0.153333000 | 1.292584000  |
| 6  | -1.617792000 | 2.068840000  | 2.452841000  |
| 1  | -0.590845000 | 1.764521000  | 2.667242000  |
| 1  | -1.601960000 | 2.744446000  | 1.595372000  |
| 1  | -1.991815000 | 2.628571000  | 3.312840000  |
| 6  | -3.914210000 | 1.244976000  | 1.792641000  |
| 1  | -4.556726000 | 0.362892000  | 1.744573000  |
| 1  | -4.347670000 | 1.946078000  | 2.509220000  |
| 1  | -3.923085000 | 1.726534000  | 0.812574000  |
| 6  | -2.641701000 | -2.189822000 | 2.525987000  |
| 1  | -3.447423000 | -2.341238000 | 1.804511000  |
| 1  | -2.296201000 | -3.170130000 | 2.860563000  |
| 1  | -3.057935000 | -1.680397000 | 3.398848000  |
| 6  | -0.364309000 | -1.184069000 | 2.912632000  |
| 1  | 0.476616000  | -0.663307000 | 2.444479000  |
| 1  | -0.701175000 | -0.603824000 | 3.775973000  |
| 1  | 0.002033000  | -2.141755000 | 3.289298000  |
| 6  | -3.124331000 | -3.147099000 | -1.023588000 |
| 1  | -4.163752000 | -3.466551000 | -0.923389000 |
| 1  | -2.712470000 | -3.654563000 | -1.898961000 |
| 1  | -2.576386000 | -3.489594000 | -0.143799000 |
| 6  | -3.805677000 | -1.145532000 | -2.389301000 |
| 1  | -3.784104000 | -0.054106000 | -2.445763000 |
| 1  | -3.368353000 | -1.540767000 | -3.309771000 |
| 1  | -4.848685000 | -1.467023000 | -2.356184000 |
| 6  | -2.689950000 | 2.728879000  | -1.243272000 |
| 1  | -2.906192000 | 3.522816000  | -0.517466000 |
| 1  | -2.461626000 | 3.213565000  | -2.196434000 |
| 1  | -3.621172000 | 2.177394000  | -1.394574000 |

|   |              |              |              |
|---|--------------|--------------|--------------|
| 6 | -2.509351000 | 0.862444000  | 2.209504000  |
| 6 | -1.484150000 | -1.421197000 | 1.919671000  |
| 1 | -2.592082000 | 0.341072000  | 3.166810000  |
| 1 | -1.073363000 | -2.022313000 | 1.101037000  |
| 6 | -3.064804000 | -1.637854000 | -1.160143000 |
| 1 | -3.561042000 | -1.209407000 | -0.281795000 |
| 6 | -0.762072000 | -1.611005000 | -2.193800000 |
| 1 | -1.364880000 | -2.330601000 | -2.754761000 |
| 6 | 0.419126000  | -2.352786000 | -1.607503000 |
| 1 | 0.086526000  | -3.183879000 | -0.979818000 |
| 1 | 1.049392000  | -2.757500000 | -2.403047000 |
| 1 | 1.046821000  | -1.692838000 | -1.000877000 |
| 6 | -0.337162000 | -0.540467000 | -3.183151000 |
| 1 | -1.193364000 | 0.024283000  | -3.558031000 |
| 1 | 0.377355000  | 0.158159000  | -2.743710000 |
| 1 | 0.155709000  | -1.017206000 | -4.032776000 |
| 5 | 1.630028000  | 0.613306000  | 0.094504000  |
| 6 | 3.060613000  | 2.074247000  | -1.503513000 |
| 1 | 3.300847000  | 3.078841000  | -1.870752000 |
| 1 | 3.989489000  | 1.601909000  | -1.177839000 |
| 1 | 2.669802000  | 1.484349000  | -2.338124000 |
| 6 | 2.619402000  | 2.896865000  | 0.826342000  |
| 1 | 3.509464000  | 2.400453000  | 1.216020000  |
| 1 | 2.898446000  | 3.919904000  | 0.548162000  |
| 1 | 1.887895000  | 2.944486000  | 1.639906000  |
| 6 | 3.265068000  | -0.847078000 | 1.138106000  |
| 6 | 2.878241000  | -2.186188000 | 0.923599000  |
| 6 | 4.497942000  | -0.432549000 | 0.593747000  |
| 6 | 3.481346000  | -2.916481000 | -0.072184000 |
| 1 | 2.023289000  | -2.574976000 | 1.468045000  |
| 6 | 5.081229000  | -1.172639000 | -0.408778000 |
| 1 | 4.909268000  | 0.524121000  | 0.898388000  |
| 6 | 4.552970000  | -2.401210000 | -0.801598000 |
| 1 | 3.113951000  | -3.915609000 | -0.288731000 |
| 1 | 5.982196000  | -0.797316000 | -0.884994000 |
| 1 | 5.024431000  | -2.984046000 | -1.583067000 |
| 9 | 2.946258000  | -0.315720000 | 2.360141000  |

**6TS<sup>C-F</sup> (TE= -1831.992915)**

|   |             |              |              |
|---|-------------|--------------|--------------|
| 6 | 0.227637000 | -1.923573000 | 0.025124000  |
| 7 | 0.098156000 | -0.543423000 | 0.282066000  |
| 7 | 1.513680000 | -2.253045000 | -0.138187000 |
| 6 | 1.846501000 | -3.250601000 | -1.139233000 |
| 1 | 1.729329000 | -2.837269000 | -2.146946000 |
| 1 | 2.872703000 | -3.590714000 | -1.010361000 |
| 1 | 1.178429000 | -4.103399000 | -1.018202000 |

|    |              |              |              |
|----|--------------|--------------|--------------|
| 15 | -1.556081000 | -0.758642000 | 0.028823000  |
| 6  | -1.049233000 | -2.427800000 | -0.092493000 |
| 7  | -2.483834000 | -0.218584000 | 1.267330000  |
| 7  | -2.040495000 | -0.023346000 | -1.348993000 |
| 6  | -1.416503000 | -1.580712000 | -3.226686000 |
| 1  | -0.489527000 | -1.014429000 | -3.334881000 |
| 1  | -1.191456000 | -2.485845000 | -2.660722000 |
| 1  | -1.752192000 | -1.880064000 | -4.222276000 |
| 6  | -3.744221000 | -1.553752000 | -2.260520000 |
| 1  | -4.550609000 | -0.910125000 | -1.900966000 |
| 1  | -4.089600000 | -2.063760000 | -3.161950000 |
| 1  | -3.557246000 | -2.322344000 | -1.504209000 |
| 6  | -2.893804000 | 2.272037000  | -1.847073000 |
| 1  | -3.716054000 | 2.155159000  | -1.139597000 |
| 1  | -2.592659000 | 3.322037000  | -1.839389000 |
| 1  | -3.270725000 | 2.052182000  | -2.849363000 |
| 6  | -0.563589000 | 1.632422000  | -2.482122000 |
| 1  | 0.319673000  | 1.049583000  | -2.207342000 |
| 1  | -0.867349000 | 1.379141000  | -3.502130000 |
| 1  | -0.267108000 | 2.683471000  | -2.464609000 |
| 6  | -3.996896000 | 1.696294000  | 1.668459000  |
| 1  | -4.959665000 | 2.125715000  | 1.382647000  |
| 1  | -3.970455000 | 1.653639000  | 2.760085000  |
| 1  | -3.206639000 | 2.374021000  | 1.334380000  |
| 6  | -4.919048000 | -0.646421000 | 1.464135000  |
| 1  | -4.794192000 | -1.607801000 | 0.958327000  |
| 1  | -4.917126000 | -0.826310000 | 2.541958000  |
| 1  | -5.901861000 | -0.249020000 | 1.202175000  |
| 6  | -1.641122000 | -3.781682000 | -0.187952000 |
| 1  | -2.665649000 | -3.782949000 | 0.195837000  |
| 1  | -1.684111000 | -4.181251000 | -1.208778000 |
| 1  | -1.080218000 | -4.498130000 | 0.418668000  |
| 6  | -2.494556000 | -0.748578000 | -2.551789000 |
| 6  | -1.692676000 | 1.415835000  | -1.493999000 |
| 1  | -2.776765000 | 0.043552000  | -3.251890000 |
| 1  | -1.327228000 | 1.738206000  | -0.510197000 |
| 6  | -3.838144000 | 0.327933000  | 1.037318000  |
| 1  | -3.923795000 | 0.448585000  | -0.043234000 |
| 6  | -2.121568000 | -0.465241000 | 2.692738000  |
| 1  | -3.041144000 | -0.245254000 | 3.241005000  |
| 6  | -1.058920000 | 0.489570000  | 3.194122000  |
| 1  | -1.382552000 | 1.526008000  | 3.087465000  |
| 1  | -0.871614000 | 0.304983000  | 4.254145000  |
| 1  | -0.116374000 | 0.366436000  | 2.657098000  |
| 6  | -1.775050000 | -1.909382000 | 3.001351000  |
| 1  | -2.528108000 | -2.594954000 | 2.605935000  |

|   |              |              |              |
|---|--------------|--------------|--------------|
| 1 | -0.802411000 | -2.195325000 | 2.598108000  |
| 1 | -1.733537000 | -2.037602000 | 4.084727000  |
| 5 | 1.361245000  | 0.171468000  | 0.027801000  |
| 7 | 2.224419000  | -0.973282000 | -0.216626000 |
| 6 | 3.615137000  | -1.033524000 | -0.064797000 |
| 6 | 4.386585000  | -0.028435000 | -0.644916000 |
| 6 | 4.246541000  | -2.046582000 | 0.649794000  |
| 6 | 5.758530000  | -0.029852000 | -0.492561000 |
| 1 | 3.882110000  | 0.749761000  | -1.206606000 |
| 6 | 5.625659000  | -2.047385000 | 0.781478000  |
| 1 | 3.650800000  | -2.817368000 | 1.124842000  |
| 6 | 6.390043000  | -1.041580000 | 0.217393000  |
| 1 | 6.343655000  | 0.763636000  | -0.943797000 |
| 1 | 6.103462000  | -2.840471000 | 1.345842000  |
| 1 | 7.467741000  | -1.044095000 | 0.328000000  |
| 6 | 1.673431000  | 2.425950000  | 0.799847000  |
| 6 | 2.611277000  | 3.096535000  | -0.012635000 |
| 6 | 0.398707000  | 3.013211000  | 0.932132000  |
| 6 | 2.208609000  | 4.120377000  | -0.836579000 |
| 1 | 3.637440000  | 2.746143000  | -0.013899000 |
| 6 | 0.016762000  | 4.047690000  | 0.103335000  |
| 1 | -0.292705000 | 2.602536000  | 1.658583000  |
| 6 | 0.896449000  | 4.597866000  | -0.821408000 |
| 1 | 2.939687000  | 4.582467000  | -1.492915000 |
| 1 | -0.990034000 | 4.448073000  | 0.197409000  |
| 1 | 0.594341000  | 5.417839000  | -1.461099000 |
| 9 | 2.174845000  | 1.830224000  | 1.932620000  |

**7TSC<sup>C-F</sup> (TE= -930.130844)**

|   |              |              |              |
|---|--------------|--------------|--------------|
| 6 | 1.593767000  | -2.456420000 | -0.401038000 |
| 6 | 0.265835000  | -2.544634000 | -0.403847000 |
| 1 | 2.353498000  | -3.173662000 | -0.670555000 |
| 1 | -0.319263000 | -3.409529000 | -0.685352000 |
| 6 | 3.131080000  | -0.965525000 | 0.976184000  |
| 6 | 3.265966000  | -0.549890000 | -0.214781000 |
| 7 | 1.925244000  | -1.140951000 | 0.085920000  |
| 7 | -0.339248000 | -1.377957000 | 0.060695000  |
| 5 | 0.625233000  | -0.343118000 | 0.384261000  |
| 6 | -1.740491000 | -1.245105000 | 0.130528000  |
| 6 | -2.572912000 | -1.865624000 | -0.793599000 |
| 6 | -2.295350000 | -0.435118000 | 1.113737000  |
| 6 | -3.943014000 | -1.677865000 | -0.729568000 |
| 1 | -2.147773000 | -2.468042000 | -1.588362000 |
| 6 | -3.662528000 | -0.242659000 | 1.163462000  |
| 1 | -1.629598000 | 0.054192000  | 1.817292000  |
| 6 | -4.494889000 | -0.864923000 | 0.246052000  |

|   |              |              |              |
|---|--------------|--------------|--------------|
| 1 | -4.581331000 | -2.160657000 | -1.460563000 |
| 1 | -4.081065000 | 0.401553000  | 1.928282000  |
| 1 | -5.566894000 | -0.713870000 | 0.288920000  |
| 6 | 3.843114000  | -0.006502000 | -1.433484000 |
| 1 | 3.344042000  | 0.924126000  | -1.708791000 |
| 1 | 4.908351000  | 0.172786000  | -1.296094000 |
| 1 | 3.699511000  | -0.710714000 | -2.256166000 |
| 6 | 3.347585000  | -1.324164000 | 2.366068000  |
| 1 | 4.372560000  | -1.106294000 | 2.662445000  |
| 1 | 2.659447000  | -0.763098000 | 3.002585000  |
| 1 | 3.152471000  | -2.389302000 | 2.512022000  |
| 6 | 0.370369000  | 1.548777000  | -0.652664000 |
| 6 | -1.008846000 | 1.814164000  | -0.788304000 |
| 6 | 1.186944000  | 2.589761000  | -0.148110000 |
| 6 | -1.568171000 | 2.853518000  | -0.077075000 |
| 1 | -1.626416000 | 1.124982000  | -1.354230000 |
| 6 | 0.609745000  | 3.618052000  | 0.550366000  |
| 1 | 2.265722000  | 2.484997000  | -0.195364000 |
| 6 | -0.779820000 | 3.738376000  | 0.648729000  |
| 1 | -2.645458000 | 2.986308000  | -0.105862000 |
| 1 | 1.247579000  | 4.359614000  | 1.020889000  |
| 1 | -1.226249000 | 4.556785000  | 1.199377000  |
| 9 | 0.922492000  | 0.808051000  | -1.708223000 |

**9TSC<sup>C-F</sup> (TE= -1700.409789)**

|    |              |              |              |
|----|--------------|--------------|--------------|
| 6  | 0.123575000  | 2.049868000  | 0.829845000  |
| 7  | -0.145788000 | 0.755905000  | 0.202454000  |
| 15 | 1.498633000  | 0.448185000  | 0.277871000  |
| 6  | 1.523026000  | 1.991874000  | 1.020724000  |
| 7  | 1.823823000  | -0.954699000 | 1.095150000  |
| 7  | 2.191275000  | 0.217386000  | -1.200271000 |
| 6  | 1.981435000  | 2.529442000  | -2.187129000 |
| 1  | 0.996887000  | 2.244164000  | -2.563761000 |
| 1  | 1.836067000  | 3.105578000  | -1.272172000 |
| 1  | 2.456205000  | 3.177033000  | -2.928100000 |
| 6  | 4.181484000  | 1.661247000  | -1.308786000 |
| 1  | 4.831253000  | 0.784158000  | -1.258320000 |
| 1  | 4.692395000  | 2.434611000  | -1.886810000 |
| 1  | 4.043543000  | 2.042839000  | -0.293705000 |
| 6  | 2.979261000  | -1.724458000 | -2.534476000 |
| 1  | 3.695097000  | -1.984231000 | -1.752248000 |
| 1  | 2.648412000  | -2.649752000 | -3.010769000 |
| 1  | 3.504561000  | -1.140213000 | -3.294643000 |
| 6  | 0.780582000  | -0.629749000 | -3.063095000 |
| 1  | -0.107235000 | -0.150847000 | -2.638927000 |
| 1  | 1.213426000  | 0.032716000  | -3.817473000 |

|   |              |              |              |
|---|--------------|--------------|--------------|
| 1 | 0.462156000  | -1.540406000 | -3.575863000 |
| 6 | 3.288680000  | -2.956364000 | 0.983818000  |
| 1 | 4.329759000  | -3.264433000 | 0.863853000  |
| 1 | 2.900297000  | -3.465217000 | 1.869267000  |
| 1 | 2.726965000  | -3.308995000 | 0.116478000  |
| 6 | 3.983134000  | -0.931974000 | 2.313507000  |
| 1 | 3.978492000  | 0.161633000  | 2.333787000  |
| 1 | 3.551785000  | -1.288680000 | 3.252701000  |
| 1 | 5.021529000  | -1.268776000 | 2.277943000  |
| 6 | 2.470854000  | 2.923944000  | 1.671497000  |
| 1 | 3.382965000  | 2.410282000  | 1.990523000  |
| 1 | 2.787452000  | 3.758409000  | 1.029760000  |
| 1 | 2.031424000  | 3.365830000  | 2.571565000  |
| 6 | 2.852326000  | 1.307404000  | -1.945279000 |
| 6 | 1.782356000  | -0.976543000 | -1.977721000 |
| 1 | 3.072025000  | 0.875538000  | -2.926197000 |
| 1 | 1.274200000  | -1.636293000 | -1.263313000 |
| 6 | 3.215845000  | -1.446583000 | 1.108936000  |
| 1 | 3.687551000  | -1.023654000 | 0.217469000  |
| 6 | 0.945438000  | -1.461558000 | 2.179116000  |
| 1 | 1.587423000  | -2.130831000 | 2.759174000  |
| 6 | -0.185554000 | -2.292357000 | 1.611963000  |
| 1 | 0.197473000  | -3.103656000 | 0.988574000  |
| 1 | -0.780101000 | -2.733218000 | 2.416156000  |
| 1 | -0.858723000 | -1.690151000 | 0.995432000  |
| 6 | 0.446077000  | -0.409442000 | 3.154874000  |
| 1 | 1.262997000  | 0.207558000  | 3.535331000  |
| 1 | -0.301674000 | 0.249192000  | 2.706813000  |
| 1 | -0.025514000 | -0.914298000 | 4.001153000  |
| 5 | -1.484928000 | 0.544357000  | -0.222315000 |
| 6 | -1.041511000 | 2.717603000  | 0.954380000  |
| 1 | -1.287825000 | 3.696196000  | 1.333004000  |
| 6 | -3.426642000 | 1.808817000  | 1.069320000  |
| 6 | -3.387119000 | 2.430405000  | -0.040456000 |
| 7 | -2.092776000 | 1.854550000  | 0.392954000  |
| 6 | -3.830410000 | 1.186821000  | 2.318230000  |
| 1 | -4.875862000 | 1.390030000  | 2.546387000  |
| 1 | -3.680919000 | 0.103830000  | 2.244612000  |
| 1 | -3.206944000 | 1.560299000  | 3.134755000  |
| 6 | -3.767737000 | 3.191594000  | -1.219143000 |
| 1 | -3.624892000 | 2.571547000  | -2.108069000 |
| 1 | -4.808947000 | 3.505365000  | -1.163151000 |
| 1 | -3.132735000 | 4.075184000  | -1.317299000 |
| 6 | -2.970455000 | -1.059917000 | -1.195919000 |
| 6 | -2.233888000 | -2.234195000 | -1.461151000 |
| 6 | -4.080641000 | -1.176327000 | -0.333660000 |



|   |              |              |              |
|---|--------------|--------------|--------------|
| 6 | -2.438535000 | -3.366419000 | -0.708087000 |
| 1 | -1.456434000 | -2.198731000 | -2.216586000 |
| 6 | -4.258987000 | -2.316367000 | 0.420833000  |
| 1 | -4.748600000 | -0.328065000 | -0.229868000 |
| 6 | -3.426149000 | -3.420962000 | 0.273925000  |
| 1 | -1.817399000 | -4.237708000 | -0.894371000 |
| 1 | -5.088546000 | -2.356541000 | 1.121085000  |
| 1 | -3.579031000 | -4.317414000 | 0.861591000  |
| 9 | -3.137069000 | -0.200049000 | -2.255730000 |

**IIIa-TS<sup>C-F</sup> (TE= -1340.688970)**

|    |              |              |              |
|----|--------------|--------------|--------------|
| 13 | -0.000088000 | -0.152275000 | 0.717365000  |
| 7  | 1.399797000  | -1.397178000 | 0.245098000  |
| 7  | -1.400015000 | -1.397186000 | 0.245229000  |
| 6  | 1.249130000  | -2.684584000 | -0.039225000 |
| 6  | -1.249369000 | -2.684608000 | -0.039069000 |
| 6  | -0.000119000 | -3.301642000 | -0.117288000 |
| 1  | -0.000115000 | -4.366283000 | -0.307966000 |
| 6  | 2.679687000  | -0.781415000 | 0.184792000  |
| 6  | 3.287337000  | -0.340566000 | 1.354003000  |
| 6  | 3.275461000  | -0.510076000 | -1.041371000 |
| 6  | 4.488324000  | 0.347229000  | 1.295731000  |
| 6  | 4.478447000  | 0.171264000  | -1.094299000 |
| 6  | 5.088261000  | 0.601939000  | 0.073800000  |
| 1  | 4.954799000  | 0.688343000  | 2.212385000  |
| 1  | 4.934258000  | 0.380365000  | -2.054994000 |
| 1  | 6.025634000  | 1.143436000  | 0.030119000  |
| 6  | -2.679840000 | -0.781318000 | 0.184895000  |
| 6  | -3.275988000 | -0.510706000 | -1.041256000 |
| 6  | -3.286999000 | -0.339503000 | 1.353997000  |
| 6  | -4.478855000 | 0.170824000  | -1.094251000 |
| 6  | -4.487853000 | 0.348519000  | 1.295651000  |
| 6  | -5.088174000 | 0.602469000  | 0.073754000  |
| 1  | -4.934952000 | 0.379339000  | -2.054938000 |
| 1  | -4.953929000 | 0.690390000  | 2.212226000  |
| 1  | -6.025445000 | 1.144138000  | 0.030011000  |
| 6  | -2.454789000 | -3.537517000 | -0.278155000 |
| 1  | -2.195877000 | -4.593668000 | -0.233933000 |
| 1  | -3.234854000 | -3.327065000 | 0.455868000  |
| 1  | -2.883956000 | -3.335540000 | -1.261998000 |
| 6  | 2.454536000  | -3.537375000 | -0.278764000 |
| 1  | 2.195844000  | -4.593561000 | -0.234080000 |
| 1  | 2.882980000  | -3.335582000 | -1.262968000 |
| 1  | 3.235072000  | -3.326558000 | 0.454646000  |
| 1  | -2.804815000 | -0.537817000 | 2.305086000  |
| 1  | -2.771817000 | -0.819110000 | -1.951104000 |

|   |              |              |              |
|---|--------------|--------------|--------------|
| 1 | 2.770924000  | -0.817788000 | -1.951256000 |
| 1 | 2.805423000  | -0.539439000 | 2.305112000  |
| 6 | 0.000041000  | 1.985227000  | -0.235808000 |
| 6 | 1.212500000  | 2.685183000  | -0.257668000 |
| 6 | -1.212185000 | 2.685566000  | -0.257549000 |
| 6 | 1.196872000  | 4.053285000  | -0.084688000 |
| 1 | 2.149249000  | 2.144696000  | -0.342272000 |
| 6 | -1.196143000 | 4.053659000  | -0.084570000 |
| 1 | -2.149081000 | 2.145343000  | -0.342046000 |
| 6 | 0.000477000  | 4.752855000  | 0.022646000  |
| 1 | 2.141307000  | 4.585330000  | -0.043161000 |
| 1 | -2.140413000 | 4.585988000  | -0.042954000 |
| 1 | 0.000652000  | 5.827259000  | 0.156297000  |
| 9 | -0.000311000 | 0.747294000  | -1.134218000 |

Cartesian coordinates of the transition states involved in the activation of C-H bond (*para*, *meta* and *ortho*) of C<sub>6</sub>H<sub>5</sub>F by **4-7** and **9**, along with their total energies (in hartrees) including zero point vibrational correction.

**4TSP<sup>(C-F)</sup>** (TE= -2044.791479)

|    |              |              |              |
|----|--------------|--------------|--------------|
| 6  | 0.381796000  | -2.141863000 | 0.378924000  |
| 6  | -1.696325000 | -2.275838000 | -0.527768000 |
| 7  | 0.134366000  | -0.940623000 | -0.307397000 |
| 7  | -0.674070000 | -2.933573000 | 0.296897000  |
| 6  | -0.704638000 | -4.299664000 | 0.740220000  |
| 1  | -0.889106000 | -4.970459000 | -0.104994000 |
| 1  | 0.248407000  | -4.566198000 | 1.197427000  |
| 1  | -1.492236000 | -4.460750000 | 1.484283000  |
| 15 | -3.357755000 | -2.451854000 | -0.209494000 |
| 6  | -3.896069000 | -2.050328000 | 1.477602000  |
| 1  | -4.963397000 | -2.232743000 | 1.619786000  |
| 1  | -3.332548000 | -2.656299000 | 2.190274000  |
| 1  | -3.673020000 | -0.998436000 | 1.666892000  |
| 6  | -4.042027000 | -4.112123000 | -0.458164000 |
| 1  | -5.122359000 | -4.105158000 | -0.299262000 |
| 1  | -3.824717000 | -4.436149000 | -1.476490000 |
| 1  | -3.591951000 | -4.820827000 | 0.238610000  |
| 6  | -4.276614000 | -1.374617000 | -1.304302000 |
| 1  | -5.344380000 | -1.508122000 | -1.116634000 |
| 1  | -3.990543000 | -0.329676000 | -1.145877000 |
| 1  | -4.047693000 | -1.638788000 | -2.336788000 |
| 15 | 1.656674000  | -0.445612000 | 0.183547000  |
| 6  | 1.664659000  | -2.016660000 | 0.924513000  |
| 7  | 2.637913000  | -0.111943000 | -1.093965000 |
| 7  | 1.742423000  | 0.860515000  | 1.178532000  |
| 6  | -0.183411000 | 0.303279000  | 2.707900000  |

|   |              |              |              |
|---|--------------|--------------|--------------|
| 1 | -0.855397000 | 0.817680000  | 2.016673000  |
| 1 | -0.250924000 | -0.770196000 | 2.514929000  |
| 1 | -0.535348000 | 0.480774000  | 3.726843000  |
| 6 | 2.203033000  | 0.098289000  | 3.501082000  |
| 1 | 3.222205000  | 0.466454000  | 3.359143000  |
| 1 | 1.918037000  | 0.271745000  | 4.541363000  |
| 1 | 2.196035000  | -0.978156000 | 3.329521000  |
| 6 | 3.032249000  | 2.961251000  | 1.380219000  |
| 1 | 3.953657000  | 2.374706000  | 1.416081000  |
| 1 | 3.248523000  | 3.906598000  | 0.877589000  |
| 1 | 2.741696000  | 3.200858000  | 2.406277000  |
| 6 | 0.647019000  | 3.007328000  | 0.558061000  |
| 1 | -0.120914000 | 2.462582000  | 0.000211000  |
| 1 | 0.244024000  | 3.235360000  | 1.548683000  |
| 1 | 0.818677000  | 3.959890000  | 0.051611000  |
| 6 | 4.816123000  | 1.064138000  | -1.350602000 |
| 1 | 5.840846000  | 1.081637000  | -0.973934000 |
| 1 | 4.874564000  | 1.019807000  | -2.440502000 |
| 1 | 4.336433000  | 2.004498000  | -1.073763000 |
| 6 | 4.736779000  | -1.438994000 | -1.189036000 |
| 1 | 4.208695000  | -2.292643000 | -0.758361000 |
| 1 | 4.744973000  | -1.552853000 | -2.276087000 |
| 1 | 5.773989000  | -1.464145000 | -0.847828000 |
| 6 | 2.575663000  | -2.906028000 | 1.685712000  |
| 1 | 2.141979000  | -3.260931000 | 2.628953000  |
| 1 | 2.883416000  | -3.793517000 | 1.120243000  |
| 1 | 3.493705000  | -2.373549000 | 1.948132000  |
| 6 | 1.240782000  | 0.813020000  | 2.574594000  |
| 6 | 1.940891000  | 2.223204000  | 0.629601000  |
| 1 | 1.221776000  | 1.860366000  | 2.886077000  |
| 1 | 2.288258000  | 2.075709000  | -0.393854000 |
| 6 | 4.080447000  | -0.133843000 | -0.778573000 |
| 1 | 4.145044000  | -0.059644000 | 0.317597000  |
| 6 | 2.226047000  | -0.159175000 | -2.513875000 |
| 1 | 3.140708000  | 0.082920000  | -3.064850000 |
| 6 | 1.209693000  | 0.922324000  | -2.825208000 |
| 1 | 1.602754000  | 1.912989000  | -2.581463000 |
| 1 | 0.962838000  | 0.908739000  | -3.889123000 |
| 1 | 0.274601000  | 0.764742000  | -2.275629000 |
| 6 | 1.771687000  | -1.531485000 | -2.984369000 |
| 1 | 2.493488000  | -2.303740000 | -2.711616000 |
| 1 | 0.801274000  | -1.799792000 | -2.563864000 |
| 1 | 1.671159000  | -1.528981000 | -4.072170000 |
| 5 | -1.218227000 | -0.880716000 | -0.916596000 |
| 1 | -2.000175000 | 0.486572000  | -1.243329000 |
| 6 | -2.559176000 | 1.755615000  | -1.040794000 |

|   |              |             |              |
|---|--------------|-------------|--------------|
| 6 | -2.905493000 | 2.004897000 | 0.283677000  |
| 6 | -2.321655000 | 2.878566000 | -1.832290000 |
| 6 | -3.045306000 | 3.282741000 | 0.809730000  |
| 1 | -3.054870000 | 1.153861000 | 0.957785000  |
| 6 | -2.427270000 | 4.176703000 | -1.342792000 |
| 1 | -2.035495000 | 2.753544000 | -2.877688000 |
| 6 | -2.794958000 | 4.352170000 | -0.025316000 |
| 1 | -3.331223000 | 3.465093000 | 1.841350000  |
| 1 | -2.232843000 | 5.048696000 | -1.960051000 |
| 9 | -2.902583000 | 5.603714000 | 0.464340000  |

**4TS<sup>m</sup>(C-F) (TE= -2044.794230)**

|    |              |              |              |
|----|--------------|--------------|--------------|
| 6  | 0.094735000  | -2.173190000 | 0.239911000  |
| 6  | -1.998784000 | -1.957528000 | -0.613389000 |
| 7  | -0.005449000 | -0.893578000 | -0.333673000 |
| 7  | -1.054708000 | -2.814595000 | 0.115184000  |
| 6  | -1.251492000 | -4.202366000 | 0.429377000  |
| 1  | -1.530023000 | -4.760903000 | -0.470121000 |
| 1  | -0.333730000 | -4.627816000 | 0.835467000  |
| 1  | -2.043299000 | -4.335351000 | 1.174315000  |
| 15 | -3.666049000 | -1.973992000 | -0.279350000 |
| 6  | -4.142352000 | -1.699998000 | 1.451488000  |
| 1  | -5.223175000 | -1.773884000 | 1.589990000  |
| 1  | -3.650628000 | -2.440298000 | 2.086017000  |
| 1  | -3.800261000 | -0.707105000 | 1.749924000  |
| 6  | -4.541458000 | -3.507104000 | -0.690713000 |
| 1  | -5.612041000 | -3.392349000 | -0.509151000 |
| 1  | -4.372318000 | -3.740034000 | -1.742561000 |
| 1  | -4.171529000 | -4.335199000 | -0.084402000 |
| 6  | -4.460672000 | -0.685267000 | -1.232164000 |
| 1  | -5.533687000 | -0.707485000 | -1.029313000 |
| 1  | -4.046223000 | 0.295921000  | -0.976424000 |
| 1  | -4.281606000 | -0.867199000 | -2.291696000 |
| 15 | 1.575336000  | -0.643584000 | 0.158605000  |
| 6  | 1.389024000  | -2.260691000 | 0.764598000  |
| 7  | 2.576378000  | -0.333764000 | -1.109728000 |
| 7  | 1.844855000  | 0.552029000  | 1.254180000  |
| 6  | -0.110189000 | 0.128346000  | 2.789094000  |
| 1  | -0.719368000 | 0.799177000  | 2.178620000  |
| 1  | -0.330745000 | -0.899904000 | 2.492099000  |
| 1  | -0.411428000 | 0.244927000  | 3.832856000  |
| 6  | 2.239660000  | -0.468213000 | 3.488172000  |
| 1  | 3.297413000  | -0.235878000 | 3.340680000  |
| 1  | 2.006488000  | -0.344751000 | 4.548287000  |
| 1  | 2.075207000  | -1.514759000 | 3.231373000  |
| 6  | 3.382302000  | 2.461866000  | 1.580183000  |

|   |              |              |              |
|---|--------------|--------------|--------------|
| 1 | 4.225591000  | 1.767749000  | 1.543364000  |
| 1 | 3.701963000  | 3.411479000  | 1.145267000  |
| 1 | 3.144317000  | 2.651906000  | 2.629916000  |
| 6 | 1.002672000  | 2.857122000  | 0.840572000  |
| 1 | 0.158947000  | 2.449992000  | 0.275029000  |
| 1 | 0.658442000  | 3.057333000  | 1.858880000  |
| 1 | 1.272998000  | 3.817562000  | 0.395380000  |
| 6 | 4.882239000  | 0.579447000  | -1.310732000 |
| 1 | 5.907575000  | 0.430517000  | -0.966065000 |
| 1 | 4.913150000  | 0.630385000  | -2.401484000 |
| 1 | 4.534527000  | 1.543289000  | -0.935295000 |
| 6 | 4.489967000  | -1.899430000 | -1.357836000 |
| 1 | 3.865324000  | -2.714842000 | -0.986286000 |
| 1 | 4.469543000  | -1.921728000 | -2.450440000 |
| 1 | 5.520201000  | -2.081242000 | -1.044251000 |
| 6 | 2.188435000  | -3.324355000 | 1.420368000  |
| 1 | 1.723524000  | -3.708032000 | 2.337056000  |
| 1 | 2.374517000  | -4.187175000 | 0.769882000  |
| 1 | 3.169415000  | -2.938097000 | 1.709496000  |
| 6 | 1.367800000  | 0.449892000  | 2.656181000  |
| 6 | 2.193823000  | 1.922323000  | 0.808422000  |
| 1 | 1.500198000  | 1.458292000  | 3.056184000  |
| 1 | 2.498118000  | 1.819204000  | -0.234156000 |
| 6 | 4.007877000  | -0.562458000 | -0.826129000 |
| 1 | 4.092366000  | -0.591172000 | 0.270706000  |
| 6 | 2.150784000  | -0.227069000 | -2.522385000 |
| 1 | 3.086156000  | -0.074764000 | -3.070715000 |
| 6 | 1.290386000  | 1.001366000  | -2.743055000 |
| 1 | 1.814432000  | 1.909381000  | -2.433115000 |
| 1 | 1.040873000  | 1.099007000  | -3.801901000 |
| 1 | 0.344722000  | 0.931127000  | -2.193577000 |
| 6 | 1.509512000  | -1.488198000 | -3.079042000 |
| 1 | 2.116462000  | -2.370231000 | -2.865390000 |
| 1 | 0.510069000  | -1.646768000 | -2.670595000 |
| 1 | 1.412044000  | -1.397782000 | -4.163369000 |
| 5 | -1.350631000 | -0.605754000 | -0.892701000 |
| 1 | -2.003145000 | 0.861795000  | -1.035323000 |
| 6 | -2.410251000 | 2.134932000  | -0.668023000 |
| 6 | -2.713529000 | 2.289626000  | 0.684093000  |
| 6 | -1.998582000 | 3.277963000  | -1.351664000 |
| 6 | -2.650452000 | 3.513329000  | 1.331644000  |
| 1 | -2.996763000 | 1.405924000  | 1.264967000  |
| 6 | -1.916321000 | 4.490638000  | -0.698274000 |
| 1 | -1.727921000 | 3.244143000  | -2.407627000 |
| 6 | -2.239715000 | 4.642811000  | 0.635161000  |
| 1 | -2.913699000 | 3.602206000  | 2.382713000  |

|   |              |             |              |
|---|--------------|-------------|--------------|
| 1 | -2.160742000 | 5.616447000 | 1.103761000  |
| 9 | -1.502051000 | 5.580664000 | -1.377908000 |

**4TS<sup>o</sup>(C-F)** (TE= -2044.798112)

|    |              |              |              |
|----|--------------|--------------|--------------|
| 6  | 0.010132000  | -2.152367000 | 0.166025000  |
| 6  | -2.100877000 | -1.791778000 | -0.589482000 |
| 7  | -0.063966000 | -0.825298000 | -0.290642000 |
| 7  | -1.167897000 | -2.738545000 | 0.036337000  |
| 6  | -1.411503000 | -4.137655000 | 0.250996000  |
| 1  | -1.735261000 | -4.616168000 | -0.678950000 |
| 1  | -0.502066000 | -4.627264000 | 0.599607000  |
| 1  | -2.190210000 | -4.294113000 | 1.005345000  |
| 15 | -3.751004000 | -1.752811000 | -0.182621000 |
| 6  | -4.143351000 | -1.538091000 | 1.577960000  |
| 1  | -5.218732000 | -1.574114000 | 1.765446000  |
| 1  | -3.653838000 | -2.327354000 | 2.152942000  |
| 1  | -3.743537000 | -0.575809000 | 1.903807000  |
| 6  | -4.710237000 | -3.226312000 | -0.623724000 |
| 1  | -5.766677000 | -3.074893000 | -0.393341000 |
| 1  | -4.592966000 | -3.419429000 | -1.690589000 |
| 1  | -4.353956000 | -4.095226000 | -0.068695000 |
| 6  | -4.536251000 | -0.393522000 | -1.045452000 |
| 1  | -5.605536000 | -0.404377000 | -0.821909000 |
| 1  | -4.095574000 | 0.558901000  | -0.743900000 |
| 1  | -4.381298000 | -0.516784000 | -2.117041000 |
| 15 | 1.547655000  | -0.676614000 | 0.136620000  |
| 6  | 1.322569000  | -2.330671000 | 0.618986000  |
| 7  | 2.492989000  | -0.298681000 | -1.155361000 |
| 7  | 1.925528000  | 0.410594000  | 1.311718000  |
| 6  | 0.020463000  | -0.042122000 | 2.898753000  |
| 1  | -0.576154000 | 0.707243000  | 2.372907000  |
| 1  | -0.269243000 | -1.029052000 | 2.529741000  |
| 1  | -0.229007000 | 0.002276000  | 3.961559000  |
| 6  | 2.363461000  | -0.812772000 | 3.433115000  |
| 1  | 3.424684000  | -0.618466000 | 3.257638000  |
| 1  | 2.180884000  | -0.770486000 | 4.509393000  |
| 1  | 2.135591000  | -1.824151000 | 3.096060000  |
| 6  | 3.578808000  | 2.203759000  | 1.721923000  |
| 1  | 4.379771000  | 1.472282000  | 1.589334000  |
| 1  | 3.932562000  | 3.168510000  | 1.351347000  |
| 1  | 3.396450000  | 2.317141000  | 2.793662000  |
| 6  | 1.195221000  | 2.782646000  | 1.130041000  |
| 1  | 0.309717000  | 2.471534000  | 0.568022000  |
| 1  | 0.900134000  | 2.907054000  | 2.175781000  |
| 1  | 1.501219000  | 3.764012000  | 0.760623000  |
| 6  | 4.824534000  | 0.531419000  | -1.419162000 |

|   |              |              |              |
|---|--------------|--------------|--------------|
| 1 | 5.856455000  | 0.319669000  | -1.131866000 |
| 1 | 4.811835000  | 0.658884000  | -2.503950000 |
| 1 | 4.532264000  | 1.478436000  | -0.962694000 |
| 6 | 4.317012000  | -1.914718000 | -1.644709000 |
| 1 | 3.676384000  | -2.732415000 | -1.307203000 |
| 1 | 4.237258000  | -1.842110000 | -2.732403000 |
| 1 | 5.353293000  | -2.164701000 | -1.406763000 |
| 6 | 2.110370000  | -3.475529000 | 1.137987000  |
| 1 | 1.679711000  | -3.918710000 | 2.044533000  |
| 1 | 2.225625000  | -4.286136000 | 0.408693000  |
| 1 | 3.120605000  | -3.151784000 | 1.402465000  |
| 6 | 1.506639000  | 0.214563000  | 2.721797000  |
| 6 | 2.330424000  | 1.793661000  | 0.965145000  |
| 1 | 1.710409000  | 1.177974000  | 3.196279000  |
| 1 | 2.583275000  | 1.763886000  | -0.095534000 |
| 6 | 3.925578000  | -0.609092000 | -0.977602000 |
| 1 | 4.069302000  | -0.733854000 | 0.106461000  |
| 6 | 1.992153000  | -0.035641000 | -2.523113000 |
| 1 | 2.899765000  | 0.144936000  | -3.108437000 |
| 6 | 1.161373000  | 1.231837000  | -2.568038000 |
| 1 | 1.732846000  | 2.091288000  | -2.207206000 |
| 1 | 0.849077000  | 1.441107000  | -3.593191000 |
| 1 | 0.248703000  | 1.133988000  | -1.969639000 |
| 6 | 1.276810000  | -1.216203000 | -3.160179000 |
| 1 | 1.866957000  | -2.130876000 | -3.077432000 |
| 1 | 0.301413000  | -1.390276000 | -2.702685000 |
| 1 | 1.112039000  | -1.012601000 | -4.220697000 |
| 5 | -1.415808000 | -0.440497000 | -0.771893000 |
| 1 | -1.915511000 | 1.143209000  | -0.931347000 |
| 6 | -2.184605000 | 2.417457000  | -0.558072000 |
| 6 | -2.429548000 | 2.498979000  | 0.806961000  |
| 6 | -1.849103000 | 3.608731000  | -1.157566000 |
| 6 | -2.370496000 | 3.686638000  | 1.522108000  |
| 1 | -2.645282000 | 1.565551000  | 1.340594000  |
| 6 | -1.741737000 | 4.819509000  | -0.496819000 |
| 6 | -2.013687000 | 4.854954000  | 0.863283000  |
| 1 | -2.585069000 | 3.707112000  | 2.586609000  |
| 1 | -1.456314000 | 5.715697000  | -1.039053000 |
| 9 | -1.601402000 | 3.625478000  | -2.494430000 |
| 1 | -1.941593000 | 5.792448000  | 1.403695000  |

**5TS<sup>p(C-F)</sup> (TE= -1663.599852)**

|    |              |              |              |
|----|--------------|--------------|--------------|
| 6  | -1.405495000 | 1.790259000  | 0.516126000  |
| 6  | 0.054167000  | 3.344236000  | -0.424875000 |
| 7  | -0.520280000 | 1.053495000  | -0.312467000 |
| 7  | -1.142579000 | 3.078857000  | 0.453454000  |
| 6  | -1.848162000 | 4.091592000  | 1.193551000  |
| 1  | -2.376592000 | 4.776111000  | 0.524551000  |
| 1  | -2.578823000 | 3.627088000  | 1.855245000  |
| 1  | -1.156872000 | 4.676328000  | 1.805878000  |
| 15 | -1.318833000 | -0.332222000 | 0.214478000  |
| 6  | -2.226740000 | 0.851038000  | 1.115391000  |
| 7  | -2.028767000 | -1.155307000 | -1.017471000 |
| 7  | -0.457642000 | -1.432815000 | 1.069187000  |
| 6  | 0.703103000  | 0.118169000  | 2.681726000  |
| 1  | 1.506881000  | 0.241956000  | 1.951780000  |
| 1  | 0.029888000  | 0.975412000  | 2.606623000  |
| 1  | 1.144557000  | 0.129638000  | 3.680591000  |
| 6  | -1.169823000 | -1.390310000 | 3.450398000  |
| 1  | -1.680767000 | -2.338270000 | 3.266028000  |
| 1  | -0.784927000 | -1.403147000 | 4.472537000  |
| 1  | -1.901107000 | -0.584438000 | 3.384326000  |
| 6  | -0.077827000 | -3.879944000 | 1.042347000  |
| 1  | -1.155023000 | -4.043970000 | 1.121749000  |
| 1  | 0.347156000  | -4.692023000 | 0.448400000  |
| 1  | 0.352193000  | -3.954570000 | 2.044272000  |
| 6  | 1.724848000  | -2.302898000 | 0.259056000  |
| 1  | 1.929931000  | -1.335566000 | -0.207907000 |
| 1  | 2.229932000  | -2.323270000 | 1.228563000  |
| 1  | 2.180231000  | -3.079644000 | -0.359155000 |
| 6  | -2.905381000 | -3.468088000 | -1.278494000 |
| 1  | -3.600485000 | -4.188232000 | -0.842110000 |
| 1  | -3.129629000 | -3.409705000 | -2.345993000 |
| 1  | -1.893933000 | -3.860563000 | -1.164646000 |
| 6  | -4.468100000 | -1.569351000 | -0.776698000 |
| 1  | -4.582963000 | -0.611132000 | -0.265095000 |
| 1  | -4.705448000 | -1.423570000 | -1.833542000 |
| 1  | -5.202126000 | -2.267668000 | -0.369277000 |
| 6  | -3.413455000 | 0.917014000  | 2.005715000  |
| 1  | -3.184586000 | 1.317171000  | 3.000003000  |
| 1  | -4.215466000 | 1.532101000  | 1.584976000  |
| 1  | -3.833251000 | -0.079877000 | 2.160303000  |
| 6  | -0.030575000 | -1.192807000 | 2.472112000  |
| 6  | 0.236365000  | -2.551528000 | 0.382469000  |
| 1  | 0.695171000  | -1.986008000 | 2.666446000  |
| 1  | -0.176733000 | -2.574591000 | -0.627717000 |
| 6  | -3.066696000 | -2.122564000 | -0.596132000 |



|   |              |              |              |
|---|--------------|--------------|--------------|
| 1 | -2.908215000 | -2.280553000 | 0.480558000  |
| 6 | -1.999890000 | -0.756991000 | -2.442974000 |
| 1 | -2.664975000 | -1.476649000 | -2.930090000 |
| 6 | -0.616845000 | -0.946037000 | -3.031159000 |
| 1 | -0.286498000 | -1.982033000 | -2.921767000 |
| 1 | -0.623619000 | -0.701699000 | -4.095581000 |
| 1 | 0.115563000  | -0.285857000 | -2.552617000 |
| 6 | -2.569238000 | 0.624080000  | -2.721715000 |
| 1 | -3.541345000 | 0.758606000  | -2.243423000 |
| 1 | -1.899591000 | 1.413904000  | -2.377274000 |
| 1 | -2.699725000 | 0.751544000  | -3.798429000 |
| 5 | 0.454209000  | 1.881731000  | -1.006615000 |
| 1 | 1.847965000  | 1.525589000  | -1.103670000 |
| 6 | 3.132077000  | 0.993632000  | -0.670594000 |
| 6 | 3.815930000  | 0.923968000  | 0.537630000  |
| 6 | 3.553552000  | 0.150264000  | -1.688508000 |
| 6 | 4.875271000  | 0.042624000  | 0.734021000  |
| 1 | 3.535043000  | 1.571379000  | 1.369837000  |
| 6 | 4.622610000  | -0.724557000 | -1.541067000 |
| 1 | 3.009841000  | 0.163460000  | -2.637850000 |
| 6 | 5.257827000  | -0.764642000 | -0.317056000 |
| 1 | 5.408895000  | -0.024255000 | 1.677158000  |
| 1 | 4.963254000  | -1.374732000 | -2.340923000 |
| 9 | 6.283359000  | -1.619340000 | -0.141842000 |
| 6 | 1.191294000  | 3.884474000  | 0.427527000  |
| 1 | 2.088674000  | 3.987989000  | -0.185600000 |
| 1 | 0.956900000  | 4.866159000  | 0.854887000  |
| 1 | 1.430981000  | 3.198249000  | 1.246038000  |
| 6 | -0.325948000 | 4.331397000  | -1.511211000 |
| 1 | -0.608481000 | 5.306682000  | -1.097435000 |
| 1 | 0.525046000  | 4.484679000  | -2.176992000 |
| 1 | -1.158031000 | 3.958901000  | -2.115603000 |

**5TS<sup>m(C-F)</sup> (TE= -1663.602360)**

|    |              |              |              |
|----|--------------|--------------|--------------|
| 6  | -1.298189000 | 1.877187000  | 0.366757000  |
| 6  | 0.295176000  | 3.292982000  | -0.573073000 |
| 7  | -0.411545000 | 1.046351000  | -0.366665000 |
| 7  | -0.971321000 | 3.146314000  | 0.233649000  |
| 6  | -1.586117000 | 4.215125000  | 0.977382000  |
| 1  | -1.729723000 | 5.088799000  | 0.338688000  |
| 1  | -2.562690000 | 3.900126000  | 1.344438000  |
| 1  | -0.974189000 | 4.513277000  | 1.834611000  |
| 15 | -1.311071000 | -0.261579000 | 0.197875000  |
| 6  | -2.196815000 | 1.021056000  | 0.977295000  |
| 7  | -2.000745000 | -1.120714000 | -1.020359000 |

|   |              |              |              |
|---|--------------|--------------|--------------|
| 7 | -0.556516000 | -1.349812000 | 1.161696000  |
| 6 | 0.588714000  | 0.230810000  | 2.759714000  |
| 1 | 1.439896000  | 0.276742000  | 2.075982000  |
| 1 | -0.033836000 | 1.114982000  | 2.602139000  |
| 1 | 0.971505000  | 0.273361000  | 3.781713000  |
| 6 | -1.400431000 | -1.141207000 | 3.489822000  |
| 1 | -1.946904000 | -2.073081000 | 3.326436000  |
| 1 | -1.076501000 | -1.113701000 | 4.532582000  |
| 1 | -2.085039000 | -0.306815000 | 3.336013000  |
| 6 | -0.279332000 | -3.809409000 | 1.283084000  |
| 1 | -1.365170000 | -3.924747000 | 1.316679000  |
| 1 | 0.137550000  | -4.667856000 | 0.751914000  |
| 1 | 0.099062000  | -3.849978000 | 2.307479000  |
| 6 | 1.625248000  | -2.345877000 | 0.518434000  |
| 1 | 1.889297000  | -1.411758000 | 0.016035000  |
| 1 | 2.079138000  | -2.333717000 | 1.513053000  |
| 1 | 2.083149000  | -3.167667000 | -0.036844000 |
| 6 | -2.969513000 | -3.404262000 | -1.196035000 |
| 1 | -3.721116000 | -4.065891000 | -0.760614000 |
| 1 | -3.133324000 | -3.396811000 | -2.276073000 |
| 1 | -1.985852000 | -3.835435000 | -1.004701000 |
| 6 | -4.465426000 | -1.413637000 | -0.880036000 |
| 1 | -4.558631000 | -0.422150000 | -0.431509000 |
| 1 | -4.646988000 | -1.322154000 | -1.953809000 |
| 1 | -5.249419000 | -2.052784000 | -0.468662000 |
| 6 | -3.426499000 | 1.203648000  | 1.789679000  |
| 1 | -3.234951000 | 1.687584000  | 2.753963000  |
| 1 | -4.184423000 | 1.799899000  | 1.271317000  |
| 1 | -3.887927000 | 0.238039000  | 2.009770000  |
| 6 | -0.198134000 | -1.052577000 | 2.573082000  |
| 6 | 0.123919000  | -2.531822000 | 0.573559000  |
| 1 | 0.473775000  | -1.867728000 | 2.851747000  |
| 1 | -0.236912000 | -2.593594000 | -0.455055000 |
| 6 | -3.101508000 | -2.015946000 | -0.598514000 |
| 1 | -3.002713000 | -2.117520000 | 0.491959000  |
| 6 | -1.888699000 | -0.802963000 | -2.462223000 |
| 1 | -2.570011000 | -1.512810000 | -2.941150000 |
| 6 | -0.493694000 | -1.094991000 | -2.974930000 |
| 1 | -0.224683000 | -2.139023000 | -2.796146000 |
| 1 | -0.441039000 | -0.909249000 | -4.049820000 |
| 1 | 0.251694000  | -0.448675000 | -2.497552000 |
| 6 | -2.370157000 | 0.588124000  | -2.839563000 |

|   |              |              |              |
|---|--------------|--------------|--------------|
| 1 | -3.347484000 | 0.804307000  | -2.403696000 |
| 1 | -1.668198000 | 1.359516000  | -2.518748000 |
| 1 | -2.459410000 | 0.658083000  | -3.925705000 |
| 5 | 0.648316000  | 1.778085000  | -1.041664000 |
| 1 | 2.045300000  | 1.376506000  | -1.043603000 |
| 6 | 3.271062000  | 0.846311000  | -0.478158000 |
| 6 | 3.822742000  | 0.889962000  | 0.798712000  |
| 6 | 3.712321000  | -0.146298000 | -1.341926000 |
| 6 | 4.784144000  | -0.027357000 | 1.205330000  |
| 1 | 3.506246000  | 1.655871000  | 1.508151000  |
| 6 | 4.679620000  | -1.040932000 | -0.937301000 |
| 1 | 3.276721000  | -0.245943000 | -2.339742000 |
| 6 | 5.225906000  | -1.009990000 | 0.330511000  |
| 1 | 5.200090000  | 0.015647000  | 2.208640000  |
| 6 | 1.399629000  | 3.830433000  | 0.322249000  |
| 1 | 2.341830000  | 3.844366000  | -0.228850000 |
| 1 | 1.189799000  | 4.849814000  | 0.666209000  |
| 1 | 1.543156000  | 3.191885000  | 1.200468000  |
| 6 | 0.043877000  | 4.223805000  | -1.743347000 |
| 1 | -0.224970000 | 5.234666000  | -1.415007000 |
| 1 | 0.950073000  | 4.300145000  | -2.346826000 |
| 1 | -0.754407000 | 3.846645000  | -2.388424000 |
| 1 | 5.974181000  | -1.740611000 | 0.613889000  |
| 9 | 5.102729000  | -1.996156000 | -1.789544000 |

**5TS<sup>o</sup>(C-F)** (TE= -1663.608242)

|    |              |              |              |
|----|--------------|--------------|--------------|
| 6  | -1.732641000 | 1.616472000  | 0.286351000  |
| 6  | -0.392895000 | 3.400209000  | -0.387815000 |
| 7  | -0.524801000 | 1.055142000  | -0.202782000 |
| 7  | -1.720644000 | 2.927110000  | 0.153804000  |
| 6  | -2.764560000 | 3.796509000  | 0.630287000  |
| 1  | -2.996293000 | 4.558393000  | -0.116943000 |
| 1  | -3.670798000 | 3.220725000  | 0.818017000  |
| 1  | -2.477465000 | 4.301412000  | 1.557593000  |
| 15 | -1.164752000 | -0.456563000 | 0.189637000  |
| 6  | -2.482103000 | 0.546758000  | 0.741632000  |
| 7  | -1.377694000 | -1.397989000 | -1.137086000 |
| 7  | -0.386052000 | -1.369026000 | 1.304099000  |
| 6  | 0.258819000  | 0.423828000  | 2.945896000  |
| 1  | 1.196723000  | 0.561619000  | 2.402683000  |
| 1  | -0.444156000 | 1.196248000  | 2.624365000  |
| 1  | 0.451779000  | 0.576871000  | 4.009892000  |
| 6  | -1.610260000 | -1.182340000 | 3.469375000  |

|   |              |              |              |
|---|--------------|--------------|--------------|
| 1 | -2.028774000 | -2.166793000 | 3.246332000  |
| 1 | -1.442328000 | -1.118679000 | 4.546709000  |
| 1 | -2.347161000 | -0.423617000 | 3.205301000  |
| 6 | 0.141580000  | -3.764976000 | 1.627375000  |
| 1 | -0.912978000 | -4.012395000 | 1.483620000  |
| 1 | 0.740733000  | -4.589312000 | 1.234447000  |
| 1 | 0.334306000  | -3.709640000 | 2.701766000  |
| 6 | 1.974821000  | -2.122419000 | 1.080265000  |
| 1 | 2.223263000  | -1.206675000 | 0.537291000  |
| 1 | 2.250921000  | -1.980523000 | 2.128756000  |
| 1 | 2.599963000  | -2.926976000 | 0.686523000  |
| 6 | -1.927263000 | -3.806916000 | -1.456532000 |
| 1 | -2.655007000 | -4.571809000 | -1.178352000 |
| 1 | -1.828946000 | -3.836819000 | -2.543847000 |
| 1 | -0.965202000 | -4.079391000 | -1.020412000 |
| 6 | -3.723820000 | -2.066859000 | -1.619683000 |
| 1 | -4.072274000 | -1.096799000 | -1.258986000 |
| 1 | -3.630679000 | -2.015403000 | -2.707341000 |
| 1 | -4.485576000 | -2.814961000 | -1.390300000 |
| 6 | -3.855542000 | 0.384062000  | 1.282991000  |
| 1 | -4.020932000 | 0.962105000  | 2.198201000  |
| 1 | -4.630020000 | 0.680477000  | 0.567735000  |
| 1 | -4.045739000 | -0.661730000 | 1.536015000  |
| 6 | -0.303307000 | -0.968183000 | 2.733003000  |
| 6 | 0.514589000  | -2.482261000 | 0.910260000  |
| 1 | 0.421095000  | -1.664959000 | 3.160844000  |
| 1 | 0.339760000  | -2.633127000 | -0.155701000 |
| 6 | -2.405105000 | -2.449672000 | -0.974211000 |
| 1 | -2.576347000 | -2.531416000 | 0.110065000  |
| 6 | -0.903005000 | -1.080409000 | -2.503090000 |
| 1 | -1.230557000 | -1.935985000 | -3.102125000 |
| 6 | 0.609527000  | -1.036181000 | -2.558420000 |
| 1 | 1.045702000  | -1.986951000 | -2.241239000 |
| 1 | 0.946187000  | -0.836782000 | -3.577480000 |
| 1 | 1.019403000  | -0.240027000 | -1.929620000 |
| 6 | -1.540663000 | 0.158813000  | -3.109235000 |
| 1 | -2.626627000 | 0.145448000  | -3.001028000 |
| 1 | -1.158182000 | 1.071135000  | -2.648495000 |
| 1 | -1.304770000 | 0.205924000  | -4.174450000 |
| 5 | 0.442619000  | 2.030217000  | -0.658297000 |
| 1 | 1.933315000  | 1.508057000  | -0.962623000 |
| 6 | 3.167575000  | 0.910504000  | -0.653024000 |

|   |              |              |              |
|---|--------------|--------------|--------------|
| 6 | 3.449983000  | 1.241112000  | 0.665563000  |
| 6 | 4.016201000  | -0.017227000 | -1.208459000 |
| 6 | 4.502397000  | 0.688796000  | 1.383904000  |
| 1 | 2.788303000  | 1.965806000  | 1.155919000  |
| 6 | 5.071110000  | -0.618297000 | -0.545195000 |
| 6 | 5.313734000  | -0.255337000 | 0.772110000  |
| 1 | 4.690949000  | 0.982827000  | 2.412276000  |
| 6 | 0.295676000  | 4.257100000  | 0.660434000  |
| 1 | 1.283694000  | 4.550822000  | 0.301109000  |
| 1 | -0.270109000 | 5.170754000  | 0.876605000  |
| 1 | 0.433899000  | 3.706560000  | 1.596495000  |
| 6 | -0.617868000 | 4.186910000  | -1.665371000 |
| 1 | -1.201322000 | 5.097897000  | -1.488740000 |
| 1 | 0.345752000  | 4.483779000  | -2.082788000 |
| 1 | -1.136280000 | 3.587181000  | -2.418663000 |
| 1 | 6.136417000  | -0.709575000 | 1.313563000  |
| 1 | 5.689319000  | -1.353558000 | -1.051060000 |
| 9 | 3.827053000  | -0.399911000 | -2.501771000 |

**6TS<sup>p(C-F)</sup> (TE= -1831.987262)**

|    |              |              |              |
|----|--------------|--------------|--------------|
| 6  | -0.011149000 | 1.557895000  | 1.008809000  |
| 7  | -0.104727000 | 0.815106000  | -0.179943000 |
| 7  | 1.244133000  | 1.995099000  | 1.200992000  |
| 6  | 1.797834000  | 1.908427000  | 2.544419000  |
| 1  | 2.675405000  | 2.544783000  | 2.640129000  |
| 1  | 1.041511000  | 2.243972000  | 3.253648000  |
| 1  | 2.080721000  | 0.874812000  | 2.771466000  |
| 15 | -1.713003000 | 0.545530000  | 0.229074000  |
| 6  | -1.253254000 | 1.536439000  | 1.599782000  |
| 7  | -2.704643000 | 1.112162000  | -0.943663000 |
| 7  | -2.158980000 | -0.991941000 | 0.537491000  |
| 6  | -0.630003000 | -1.556712000 | 2.468941000  |
| 1  | 0.135842000  | -1.824129000 | 1.736283000  |
| 1  | -0.410923000 | -0.557890000 | 2.851860000  |
| 1  | -0.555857000 | -2.257098000 | 3.303458000  |
| 6  | -3.107267000 | -1.176123000 | 2.811768000  |
| 1  | -4.096341000 | -1.357907000 | 2.385716000  |
| 1  | -3.039384000 | -1.713936000 | 3.759809000  |
| 1  | -3.020498000 | -0.109896000 | 3.029713000  |
| 6  | -3.706650000 | -2.654726000 | -0.460614000 |
| 1  | -4.543000000 | -1.972640000 | -0.291616000 |
| 1  | -3.908610000 | -3.220078000 | -1.372619000 |
| 1  | -3.679138000 | -3.372551000 | 0.362747000  |

|   |              |              |              |
|---|--------------|--------------|--------------|
| 6 | -1.218453000 | -2.830585000 | -0.833486000 |
| 1 | -0.288606000 | -2.269094000 | -0.956664000 |
| 1 | -1.083832000 | -3.530497000 | -0.004262000 |
| 1 | -1.374088000 | -3.423797000 | -1.736917000 |
| 6 | -4.980916000 | 0.544330000  | -1.757459000 |
| 1 | -6.018363000 | 0.434844000  | -1.435240000 |
| 1 | -4.981196000 | 1.201093000  | -2.630455000 |
| 1 | -4.616107000 | -0.435730000 | -2.069393000 |
| 6 | -4.631612000 | 2.486834000  | -0.198243000 |
| 1 | -4.043281000 | 2.866198000  | 0.640703000  |
| 1 | -4.560836000 | 3.208125000  | -1.016129000 |
| 1 | -5.678193000 | 2.440473000  | 0.109091000  |
| 6 | -1.830343000 | 2.169659000  | 2.808627000  |
| 1 | -1.608381000 | 1.623179000  | 3.733675000  |
| 1 | -1.456347000 | 3.189259000  | 2.936244000  |
| 1 | -2.918382000 | 2.239686000  | 2.735363000  |
| 6 | -2.019754000 | -1.640932000 | 1.866276000  |
| 6 | -2.396579000 | -1.907458000 | -0.611111000 |
| 1 | -2.200888000 | -2.698878000 | 1.662157000  |
| 1 | -2.481303000 | -1.260615000 | -1.489039000 |
| 6 | -4.150598000 | 1.112450000  | -0.622764000 |
| 1 | -4.265696000 | 0.440121000  | 0.237475000  |
| 6 | -2.268580000 | 1.937690000  | -2.099105000 |
| 1 | -3.207973000 | 2.284075000  | -2.539258000 |
| 6 | -1.567430000 | 1.090696000  | -3.140846000 |
| 1 | -2.210347000 | 0.271760000  | -3.471626000 |
| 1 | -1.319201000 | 1.700424000  | -4.012207000 |
| 1 | -0.631865000 | 0.670655000  | -2.757457000 |
| 6 | -1.482117000 | 3.182989000  | -1.728824000 |
| 1 | -1.974794000 | 3.742624000  | -0.931193000 |
| 1 | -0.464458000 | 2.947680000  | -1.413761000 |
| 1 | -1.410024000 | 3.832494000  | -2.603457000 |
| 5 | 1.217078000  | 0.628627000  | -0.795501000 |
| 1 | 1.809983000  | -0.557161000 | -1.362908000 |
| 6 | 2.314879000  | -1.949944000 | -1.073826000 |
| 6 | 2.483059000  | -2.215083000 | 0.282099000  |
| 6 | 2.181542000  | -3.060130000 | -1.905733000 |
| 6 | 2.531608000  | -3.503676000 | 0.803990000  |
| 1 | 2.576580000  | -1.377544000 | 0.981508000  |
| 6 | 2.217032000  | -4.365117000 | -1.425569000 |
| 1 | 2.034723000  | -2.922884000 | -2.977544000 |
| 6 | 2.392451000  | -4.559815000 | -0.071152000 |

|   |             |              |              |
|---|-------------|--------------|--------------|
| 1 | 2.671694000 | -3.701128000 | 1.862634000  |
| 1 | 2.113138000 | -5.227291000 | -2.077323000 |
| 9 | 2.424875000 | -5.817783000 | 0.410343000  |
| 7 | 2.025382000 | 1.406467000  | 0.137822000  |
| 6 | 3.308665000 | 1.923167000  | -0.071771000 |
| 6 | 4.239160000 | 1.112281000  | -0.721024000 |
| 6 | 3.672460000 | 3.208354000  | 0.316982000  |
| 6 | 5.508890000 | 1.591045000  | -0.973772000 |
| 1 | 3.946167000 | 0.107733000  | -1.016073000 |
| 6 | 4.955082000 | 3.670198000  | 0.067425000  |
| 1 | 2.942223000 | 3.855704000  | 0.788453000  |
| 6 | 5.879921000 | 2.868846000  | -0.577188000 |
| 1 | 6.223403000 | 0.951812000  | -1.480117000 |
| 1 | 5.225656000 | 4.674547000  | 0.373884000  |
| 1 | 6.881229000 | 3.234399000  | -0.771137000 |

**6TS<sup>m(C-F)</sup> (TE= -1831.989890)**

|    |              |              |              |
|----|--------------|--------------|--------------|
| 6  | -0.091723000 | -1.666624000 | 0.886747000  |
| 7  | 0.020885000  | -0.780470000 | -0.197901000 |
| 7  | -1.368628000 | -2.046933000 | 1.062583000  |
| 6  | -1.881320000 | -2.084452000 | 2.424836000  |
| 1  | -2.803128000 | -2.660928000 | 2.471937000  |
| 1  | -1.136508000 | -2.559574000 | 3.062937000  |
| 1  | -2.077728000 | -1.067854000 | 2.782875000  |
| 15 | 1.652999000  | -0.666516000 | 0.190400000  |
| 6  | 1.162680000  | -1.798466000 | 1.435504000  |
| 7  | 2.575903000  | -1.142741000 | -1.074168000 |
| 7  | 2.210367000  | 0.784607000  | 0.682647000  |
| 6  | 0.746228000  | 1.178771000  | 2.706950000  |
| 1  | -0.018634000 | 1.568817000  | 2.030567000  |
| 1  | 0.483524000  | 0.153351000  | 2.974728000  |
| 1  | 0.723819000  | 1.777423000  | 3.620036000  |
| 6  | 3.203250000  | 0.632675000  | 2.940893000  |
| 1  | 4.193699000  | 0.808918000  | 2.515922000  |
| 1  | 3.183058000  | 1.054858000  | 3.947897000  |
| 1  | 3.058075000  | -0.445455000 | 3.031915000  |
| 6  | 3.838595000  | 2.480258000  | -0.115941000 |
| 1  | 4.639641000  | 1.741995000  | -0.036869000 |
| 1  | 4.066407000  | 3.139801000  | -0.955721000 |
| 1  | 3.849923000  | 3.095026000  | 0.787207000  |
| 6  | 1.361076000  | 2.824571000  | -0.438882000 |
| 1  | 0.404920000  | 2.327773000  | -0.621107000 |
| 1  | 1.260636000  | 3.420672000  | 0.472306000  |

|   |              |              |              |
|---|--------------|--------------|--------------|
| 1 | 1.541074000  | 3.518321000  | -1.262899000 |
| 6 | 4.895816000  | -0.654721000 | -1.810175000 |
| 1 | 5.940545000  | -0.711040000 | -1.498190000 |
| 1 | 4.822571000  | -1.141496000 | -2.785455000 |
| 1 | 4.633563000  | 0.397030000  | -1.935148000 |
| 6 | 4.368648000  | -2.793802000 | -0.597658000 |
| 1 | 3.740618000  | -3.259583000 | 0.165387000  |
| 1 | 4.246242000  | -3.354309000 | -1.527753000 |
| 1 | 5.411892000  | -2.891686000 | -0.291064000 |
| 6 | 1.726631000  | -2.610824000 | 2.538948000  |
| 1 | 1.548717000  | -2.178005000 | 3.531233000  |
| 1 | 1.302960000  | -3.618919000 | 2.544240000  |
| 1 | 2.808339000  | -2.723079000 | 2.432206000  |
| 6 | 2.127238000  | 1.267508000  | 2.085446000  |
| 6 | 2.492079000  | 1.823891000  | -0.344794000 |
| 1 | 2.360236000  | 2.332259000  | 2.010572000  |
| 1 | 2.542169000  | 1.288008000  | -1.296793000 |
| 6 | 4.014913000  | -1.329500000 | -0.776966000 |
| 1 | 4.189704000  | -0.827322000 | 0.184225000  |
| 6 | 2.058607000  | -1.742420000 | -2.330291000 |
| 1 | 2.962091000  | -2.077514000 | -2.847829000 |
| 6 | 1.399921000  | -0.697043000 | -3.206217000 |
| 1 | 2.092809000  | 0.118235000  | -3.427178000 |
| 1 | 1.091512000  | -1.145442000 | -4.152995000 |
| 1 | 0.503744000  | -0.280361000 | -2.735129000 |
| 6 | 1.190629000  | -2.973195000 | -2.133045000 |
| 1 | 1.654073000  | -3.680471000 | -1.442518000 |
| 1 | 0.197937000  | -2.719295000 | -1.758411000 |
| 1 | 1.057660000  | -3.475098000 | -3.093535000 |
| 5 | -1.299998000 | -0.436756000 | -0.741909000 |
| 1 | -1.848498000 | 0.850390000  | -1.143773000 |
| 6 | -2.232736000 | 2.213476000  | -0.688381000 |
| 6 | -2.336119000 | 2.332833000  | 0.696943000  |
| 6 | -1.974552000 | 3.381229000  | -1.403184000 |
| 6 | -2.206928000 | 3.549117000  | 1.352867000  |
| 1 | -2.517596000 | 1.434524000  | 1.295440000  |
| 6 | -1.835522000 | 4.586138000  | -0.744767000 |
| 1 | -1.863919000 | 3.378120000  | -2.487711000 |
| 6 | -1.945885000 | 4.702633000  | 0.626661000  |
| 1 | -2.303631000 | 3.610653000  | 2.434090000  |
| 7 | -2.134235000 | -1.279963000 | 0.106900000  |
| 6 | -3.452840000 | -1.685758000 | -0.126109000 |



|   |              |              |              |
|---|--------------|--------------|--------------|
| 6 | -4.341022000 | -0.746765000 | -0.650298000 |
| 6 | -3.893191000 | -2.982415000 | 0.119631000  |
| 6 | -5.644211000 | -1.111114000 | -0.922265000 |
| 1 | -3.990503000 | 0.265658000  | -0.834413000 |
| 6 | -5.208206000 | -3.329426000 | -0.146816000 |
| 1 | -3.198314000 | -3.725969000 | 0.492120000  |
| 6 | -6.090868000 | -2.400886000 | -0.667856000 |
| 1 | -6.324727000 | -0.372492000 | -1.330708000 |
| 1 | -5.538120000 | -4.343896000 | 0.047685000  |
| 1 | -7.117682000 | -2.677083000 | -0.875673000 |
| 1 | -1.829802000 | 5.671100000  | 1.098337000  |
| 9 | -1.573124000 | 5.701833000  | -1.456613000 |

**6TS<sup>o</sup>(C-F)** (TE= -1831.994624)

|    |              |              |              |
|----|--------------|--------------|--------------|
| 6  | -0.167548000 | -1.336279000 | 1.075582000  |
| 7  | 0.024526000  | -0.681312000 | -0.152235000 |
| 7  | -1.456767000 | -1.673845000 | 1.236024000  |
| 6  | -2.045096000 | -1.494205000 | 2.554996000  |
| 1  | -3.000676000 | -2.010969000 | 2.618953000  |
| 1  | -1.367561000 | -1.916769000 | 3.296635000  |
| 1  | -2.199190000 | -0.429978000 | 2.763468000  |
| 15 | 1.642171000  | -0.549398000 | 0.279653000  |
| 6  | 1.048281000  | -1.352896000 | 1.719754000  |
| 7  | 2.584368000  | -1.366436000 | -0.782313000 |
| 7  | 2.273731000  | 0.945661000  | 0.431174000  |
| 6  | 0.620038000  | 1.957613000  | 2.047106000  |
| 1  | -0.011129000 | 2.230638000  | 1.198610000  |
| 1  | 0.218851000  | 1.044100000  | 2.494120000  |
| 1  | 0.539454000  | 2.753557000  | 2.790691000  |
| 6  | 2.967166000  | 1.351503000  | 2.768788000  |
| 1  | 4.010180000  | 1.311322000  | 2.446553000  |
| 1  | 2.893118000  | 2.051599000  | 3.603585000  |
| 1  | 2.683796000  | 0.364960000  | 3.139869000  |
| 6  | 4.064804000  | 2.329840000  | -0.586259000 |
| 1  | 4.804903000  | 1.631669000  | -0.187916000 |
| 1  | 4.433112000  | 2.705765000  | -1.543009000 |
| 1  | 4.000770000  | 3.184622000  | 0.090935000  |
| 6  | 1.657953000  | 2.593855000  | -1.312908000 |
| 1  | 0.720953000  | 2.060871000  | -1.493736000 |
| 1  | 1.449583000  | 3.408402000  | -0.613355000 |
| 1  | 1.975843000  | 3.043730000  | -2.255485000 |
| 6  | 4.974518000  | -1.207702000 | -1.438923000 |
| 1  | 5.993058000  | -1.279716000 | -1.052510000 |

|   |              |              |              |
|---|--------------|--------------|--------------|
| 1 | 4.904140000  | -1.883613000 | -2.294302000 |
| 1 | 4.818714000  | -0.188935000 | -1.797378000 |
| 6 | 4.212933000  | -2.982511000 | 0.170169000  |
| 1 | 3.503657000  | -3.228899000 | 0.963637000  |
| 1 | 4.107258000  | -3.726044000 | -0.623724000 |
| 1 | 5.223846000  | -3.074290000 | 0.572097000  |
| 6 | 1.543725000  | -1.951270000 | 2.982412000  |
| 1 | 1.262018000  | -1.372823000 | 3.870358000  |
| 1 | 1.165264000  | -2.968136000 | 3.122333000  |
| 1 | 2.634338000  | -2.016626000 | 2.982068000  |
| 6 | 2.069254000  | 1.795934000  | 1.634066000  |
| 6 | 2.724983000  | 1.654544000  | -0.796538000 |
| 1 | 2.411148000  | 2.784765000  | 1.319307000  |
| 1 | 2.867234000  | 0.873592000  | -1.547207000 |
| 6 | 3.985426000  | -1.575459000 | -0.349666000 |
| 1 | 4.147389000  | -0.881997000 | 0.487555000  |
| 6 | 2.083755000  | -2.202054000 | -1.901849000 |
| 1 | 2.984865000  | -2.692708000 | -2.281408000 |
| 6 | 1.531673000  | -1.344910000 | -3.021677000 |
| 1 | 2.282082000  | -0.632816000 | -3.373200000 |
| 1 | 1.240785000  | -1.975165000 | -3.864661000 |
| 1 | 0.641904000  | -0.791471000 | -2.705225000 |
| 6 | 1.126645000  | -3.307987000 | -1.489757000 |
| 1 | 1.504942000  | -3.863923000 | -0.629716000 |
| 1 | 0.135162000  | -2.922095000 | -1.247048000 |
| 1 | 1.009108000  | -4.007580000 | -2.319840000 |
| 5 | -1.259264000 | -0.375298000 | -0.801305000 |
| 1 | -1.720443000 | 0.937180000  | -1.267150000 |
| 6 | -2.099510000 | 2.264798000  | -0.754132000 |
| 6 | -2.627357000 | 2.304231000  | 0.533333000  |
| 6 | -1.640918000 | 3.470497000  | -1.230098000 |
| 6 | -2.700818000 | 3.472369000  | 1.282283000  |
| 1 | -2.991613000 | 1.376631000  | 0.981318000  |
| 6 | -1.666414000 | 4.659993000  | -0.524593000 |
| 6 | -2.208283000 | 4.655111000  | 0.752454000  |
| 1 | -3.132445000 | 3.462320000  | 2.278543000  |
| 1 | -1.278815000 | 5.569703000  | -0.972552000 |
| 7 | -2.157596000 | -1.069710000 | 0.124898000  |
| 6 | -3.447615000 | -1.540680000 | -0.137535000 |
| 6 | -4.304376000 | -0.732171000 | -0.885403000 |
| 6 | -3.892959000 | -2.786111000 | 0.295655000  |
| 6 | -5.577569000 | -1.170532000 | -1.187787000 |

|   |              |              |              |
|---|--------------|--------------|--------------|
| 1 | -3.952519000 | 0.238005000  | -1.220554000 |
| 6 | -5.177867000 | -3.208122000 | -0.006573000 |
| 1 | -3.221789000 | -3.436340000 | 0.844247000  |
| 6 | -6.028153000 | -2.407564000 | -0.747150000 |
| 1 | -6.231307000 | -0.531365000 | -1.770449000 |
| 1 | -5.509055000 | -4.182233000 | 0.335976000  |
| 1 | -7.031621000 | -2.741799000 | -0.981720000 |
| 1 | -2.247798000 | 5.574760000  | 1.325599000  |
| 9 | -1.116180000 | 3.525115000  | -2.483326000 |

**7TS<sup>p(C-F)</sup> (TE= -930.126443)**

|   |              |              |              |
|---|--------------|--------------|--------------|
| 6 | -0.287835000 | 2.213749000  | -1.439893000 |
| 6 | -1.346027000 | 1.405321000  | -1.455521000 |
| 1 | 0.133403000  | 2.844051000  | -2.207295000 |
| 1 | -2.002211000 | 1.248873000  | -2.299276000 |
| 6 | 1.776755000  | 2.416380000  | 0.015046000  |
| 6 | 0.990047000  | 3.298801000  | 0.478967000  |
| 7 | 0.321666000  | 2.103197000  | -0.138662000 |
| 7 | -1.531097000 | 0.741520000  | -0.249259000 |
| 5 | -0.499208000 | 1.107435000  | 0.727851000  |
| 6 | -2.563159000 | -0.188576000 | -0.045388000 |
| 6 | -3.675621000 | -0.260622000 | -0.879336000 |
| 6 | -2.472280000 | -1.066722000 | 1.033585000  |
| 6 | -4.667841000 | -1.196061000 | -0.642418000 |
| 1 | -3.787546000 | 0.425888000  | -1.709714000 |
| 6 | -3.470884000 | -1.993863000 | 1.262847000  |
| 1 | -1.605755000 | -1.017013000 | 1.680958000  |
| 6 | -4.574102000 | -2.069071000 | 0.427698000  |
| 1 | -5.527540000 | -1.233621000 | -1.301839000 |
| 1 | -3.379975000 | -2.671071000 | 2.104429000  |
| 1 | -5.353559000 | -2.798952000 | 0.610240000  |
| 6 | 0.427411000  | 4.482521000  | 1.103049000  |
| 1 | -0.187076000 | 4.187119000  | 1.956976000  |
| 1 | 1.216628000  | 5.152066000  | 1.440994000  |
| 1 | -0.211898000 | 5.013706000  | 0.393662000  |
| 6 | 2.976914000  | 1.720727000  | -0.421851000 |
| 1 | 3.852474000  | 2.347247000  | -0.258361000 |
| 1 | 3.094883000  | 0.778711000  | 0.119450000  |
| 1 | 2.898790000  | 1.483095000  | -1.485906000 |
| 6 | 1.071951000  | -0.909946000 | 0.759137000  |
| 6 | 2.198434000  | -1.177609000 | 1.521702000  |
| 6 | 1.023328000  | -1.383791000 | -0.541700000 |
| 6 | 3.254349000  | -1.926478000 | 1.015086000  |

|   |             |              |              |
|---|-------------|--------------|--------------|
| 1 | 2.271625000 | -0.795411000 | 2.539535000  |
| 6 | 2.069156000 | -2.123906000 | -1.081515000 |
| 1 | 0.151391000 | -1.184092000 | -1.166645000 |
| 6 | 3.166559000 | -2.380496000 | -0.285652000 |
| 1 | 4.134906000 | -2.161566000 | 1.603781000  |
| 1 | 2.046547000 | -2.505153000 | -2.096991000 |
| 1 | 0.186895000 | 0.123522000  | 1.344782000  |
| 9 | 4.183017000 | -3.094415000 | -0.792851000 |

**7TS<sup>m(C-F)</sup> (TE= -930.128150)**

|   |              |              |              |
|---|--------------|--------------|--------------|
| 6 | 0.415129000  | 2.347994000  | 1.286467000  |
| 6 | 1.492074000  | 1.565016000  | 1.291423000  |
| 1 | 0.056213000  | 3.064923000  | 2.008131000  |
| 1 | 2.237493000  | 1.522486000  | 2.072420000  |
| 6 | -1.795570000 | 2.321012000  | 0.044926000  |
| 6 | -1.090695000 | 3.151452000  | -0.607058000 |
| 7 | -0.320606000 | 2.058993000  | 0.081931000  |
| 7 | 1.566779000  | 0.753732000  | 0.164567000  |
| 5 | 0.433698000  | 0.973835000  | -0.734078000 |
| 6 | 2.609769000  | -0.167549000 | -0.034266000 |
| 6 | 3.838840000  | -0.039552000 | 0.605054000  |
| 6 | 2.408120000  | -1.234555000 | -0.907275000 |
| 6 | 4.841948000  | -0.966802000 | 0.381666000  |
| 1 | 4.029750000  | 0.798586000  | 1.264680000  |
| 6 | 3.418093000  | -2.152167000 | -1.125905000 |
| 1 | 1.446864000  | -1.343918000 | -1.395100000 |
| 6 | 4.639862000  | -2.028095000 | -0.483557000 |
| 1 | 5.794668000  | -0.848723000 | 0.885261000  |
| 1 | 3.242870000  | -2.979699000 | -1.803831000 |
| 1 | 5.427871000  | -2.750803000 | -0.657933000 |
| 6 | -0.637214000 | 4.256861000  | -1.431684000 |
| 1 | -0.116751000 | 3.868476000  | -2.310483000 |
| 1 | -1.479764000 | 4.867189000  | -1.752646000 |
| 1 | 0.063073000  | 4.881490000  | -0.871927000 |
| 6 | -2.919158000 | 1.658287000  | 0.686895000  |
| 1 | -3.827061000 | 2.242918000  | 0.546446000  |
| 1 | -3.061364000 | 0.656951000  | 0.272664000  |
| 1 | -2.722004000 | 1.549957000  | 1.756386000  |
| 6 | -1.126199000 | -1.086031000 | -0.434874000 |
| 6 | -2.316043000 | -1.425800000 | -1.062309000 |
| 6 | -0.961470000 | -1.396918000 | 0.907254000  |
| 6 | -3.293275000 | -2.090189000 | -0.347181000 |
| 1 | -2.504024000 | -1.185310000 | -2.108069000 |

|   |              |              |              |
|---|--------------|--------------|--------------|
| 6 | -1.958222000 | -2.054604000 | 1.616989000  |
| 1 | -0.037124000 | -1.128219000 | 1.420544000  |
| 6 | -3.143014000 | -2.408200000 | 0.988683000  |
| 1 | -1.819468000 | -2.298566000 | 2.666130000  |
| 1 | -0.295411000 | -0.096415000 | -1.163145000 |
| 1 | -3.939829000 | -2.924062000 | 1.510652000  |
| 9 | -4.436174000 | -2.439608000 | -0.960753000 |

**7TS<sup>o</sup>(C-F)** (TE= -930.131475)

|   |              |              |              |
|---|--------------|--------------|--------------|
| 6 | -0.110048000 | 2.373609000  | -1.310447000 |
| 6 | -1.272444000 | 1.725117000  | -1.303776000 |
| 1 | 0.308688000  | 3.073105000  | -2.016909000 |
| 1 | -2.043237000 | 1.797061000  | -2.057558000 |
| 6 | 2.121898000  | 1.998961000  | -0.159710000 |
| 6 | 1.565279000  | 2.894046000  | 0.546112000  |
| 7 | 0.619996000  | 1.948423000  | -0.144532000 |
| 7 | -1.403211000 | 0.884401000  | -0.200360000 |
| 5 | -0.230284000 | 0.933968000  | 0.662533000  |
| 6 | -2.547587000 | 0.089800000  | 0.008578000  |
| 6 | -3.780506000 | 0.420337000  | -0.542694000 |
| 6 | -2.439957000 | -1.051296000 | 0.799518000  |
| 6 | -4.884026000 | -0.384302000 | -0.315307000 |
| 1 | -3.892720000 | 1.320878000  | -1.134994000 |
| 6 | -3.548909000 | -1.844639000 | 1.023871000  |
| 1 | -1.476012000 | -1.317695000 | 1.218189000  |
| 6 | -4.776565000 | -1.520046000 | 0.467897000  |
| 1 | -5.838791000 | -0.110621000 | -0.749635000 |
| 1 | -3.448179000 | -2.732992000 | 1.636727000  |
| 1 | -5.642319000 | -2.146581000 | 0.645791000  |
| 6 | 1.307387000  | 4.017293000  | 1.428972000  |
| 1 | 0.773390000  | 3.669747000  | 2.316585000  |
| 1 | 2.241889000  | 4.486713000  | 1.732032000  |
| 1 | 0.682741000  | 4.758567000  | 0.925210000  |
| 6 | 3.111752000  | 1.203440000  | -0.866860000 |
| 1 | 4.095295000  | 1.660519000  | -0.769462000 |
| 1 | 3.142299000  | 0.184681000  | -0.471790000 |
| 1 | 2.846320000  | 1.139595000  | -1.924970000 |
| 6 | 1.117021000  | -1.354587000 | 0.398345000  |
| 6 | 2.305674000  | -1.833570000 | 0.897250000  |
| 6 | 0.865816000  | -1.621475000 | -0.941589000 |
| 6 | 3.220665000  | -2.560757000 | 0.158271000  |
| 6 | 1.750509000  | -2.349792000 | -1.728423000 |
| 1 | -0.054138000 | -1.248078000 | -1.396744000 |
| 6 | 2.932519000  | -2.817579000 | -1.174800000 |
| 1 | 1.522085000  | -2.552926000 | -2.769708000 |

|   |             |              |              |
|---|-------------|--------------|--------------|
| 1 | 0.419470000 | -0.267219000 | 1.063906000  |
| 1 | 3.633159000 | -3.385488000 | -1.776301000 |
| 9 | 2.622049000 | -1.579632000 | 2.188854000  |
| 1 | 4.134683000 | -2.919552000 | 0.620267000  |

**9TS<sup>p(C-F)</sup> (TE= -1700.402680)**

|    |              |              |              |
|----|--------------|--------------|--------------|
| 6  | -0.377733000 | 1.489170000  | 1.369883000  |
| 7  | -0.187887000 | 0.921724000  | 0.038842000  |
| 15 | -1.450340000 | -0.127296000 | 0.380899000  |
| 6  | -1.439039000 | 0.709250000  | 1.876680000  |
| 7  | -2.673426000 | 0.023930000  | -0.732121000 |
| 7  | -1.075140000 | -1.729199000 | 0.334335000  |
| 6  | 0.465760000  | -1.948632000 | 2.315026000  |
| 1  | 1.316691000  | -1.785249000 | 1.650712000  |
| 1  | 0.226522000  | -0.999756000 | 2.798599000  |
| 1  | 0.766605000  | -2.662312000 | 3.085780000  |
| 6  | -1.937528000 | -2.720870000 | 2.422032000  |
| 1  | -2.726980000 | -3.235778000 | 1.869115000  |
| 1  | -1.678000000 | -3.329372000 | 3.291226000  |
| 1  | -2.340494000 | -1.773920000 | 2.789068000  |
| 6  | -1.531977000 | -3.629870000 | -1.207181000 |
| 1  | -2.608248000 | -3.479702000 | -1.106211000 |
| 1  | -1.336363000 | -3.998068000 | -2.216556000 |
| 1  | -1.232510000 | -4.419956000 | -0.513652000 |
| 6  | 0.740273000  | -2.570524000 | -1.133953000 |
| 1  | 1.299449000  | -1.645703000 | -0.978243000 |
| 1  | 1.119615000  | -3.320672000 | -0.434146000 |
| 1  | 0.956024000  | -2.929043000 | -2.142898000 |
| 6  | -4.325476000 | -1.358102000 | -1.970403000 |
| 1  | -5.072612000 | -2.143626000 | -1.836090000 |
| 1  | -4.802195000 | -0.551599000 | -2.532658000 |
| 1  | -3.513051000 | -1.761740000 | -2.577957000 |
| 6  | -4.934367000 | -0.313580000 | 0.238343000  |
| 1  | -4.562494000 | -0.058788000 | 1.234803000  |
| 1  | -5.357383000 | 0.591282000  | -0.206256000 |
| 1  | -5.746032000 | -1.035687000 | 0.351283000  |
| 6  | -2.206270000 | 0.811688000  | 3.138410000  |
| 1  | -1.751189000 | 0.273093000  | 3.981342000  |
| 1  | -2.304525000 | 1.857658000  | 3.446968000  |
| 1  | -3.223342000 | 0.422478000  | 3.029305000  |
| 6  | -0.720555000 | -2.500127000 | 1.545459000  |
| 6  | -0.750584000 | -2.349934000 | -0.971841000 |
| 1  | -0.419378000 | -3.480824000 | 1.166163000  |

|   |              |              |              |
|---|--------------|--------------|--------------|
| 1 | -1.060833000 | -1.620503000 | -1.729167000 |
| 6 | -3.822851000 | -0.897019000 | -0.615473000 |
| 1 | -3.442798000 | -1.779227000 | -0.093608000 |
| 6 | -2.932792000 | 1.278545000  | -1.478037000 |
| 1 | -3.974595000 | 1.192932000  | -1.800351000 |
| 6 | -2.081490000 | 1.353304000  | -2.729998000 |
| 1 | -2.234278000 | 0.470107000  | -3.354554000 |
| 1 | -2.348794000 | 2.236363000  | -3.316365000 |
| 1 | -1.016109000 | 1.419950000  | -2.485659000 |
| 6 | -2.858199000 | 2.551158000  | -0.650904000 |
| 1 | -3.471449000 | 2.479267000  | 0.249993000  |
| 1 | -1.837091000 | 2.790736000  | -0.347173000 |
| 1 | -3.229532000 | 3.384731000  | -1.251896000 |
| 5 | 0.834896000  | 1.558891000  | -0.728960000 |
| 6 | 0.472623000  | 2.523977000  | 1.540870000  |
| 1 | 0.650447000  | 3.189338000  | 2.369971000  |
| 6 | 1.520783000  | 4.047419000  | -0.221999000 |
| 6 | 2.509822000  | 3.426882000  | 0.287216000  |
| 7 | 1.235357000  | 2.673544000  | 0.298643000  |
| 6 | 0.647818000  | 5.046174000  | -0.815030000 |
| 1 | 1.180938000  | 5.976185000  | -1.006784000 |
| 1 | 0.233614000  | 4.667383000  | -1.753780000 |
| 1 | -0.187374000 | 5.249209000  | -0.138673000 |
| 6 | 3.841174000  | 3.156074000  | 0.812319000  |
| 1 | 4.278293000  | 2.297754000  | 0.296887000  |
| 1 | 4.483601000  | 4.026667000  | 0.688322000  |
| 1 | 3.776631000  | 2.910873000  | 1.875695000  |
| 1 | 1.976588000  | 1.032040000  | -1.304458000 |
| 6 | 3.137050000  | 0.176418000  | -0.895180000 |
| 6 | 3.748581000  | -0.552624000 | -1.908862000 |
| 6 | 3.292707000  | -0.291449000 | 0.405308000  |
| 6 | 4.506790000  | -1.688580000 | -1.649408000 |
| 1 | 3.629076000  | -0.244729000 | -2.947500000 |
| 6 | 4.042136000  | -1.424493000 | 0.702676000  |
| 1 | 2.803642000  | 0.224782000  | 1.235082000  |
| 6 | 4.637155000  | -2.102678000 | -0.340014000 |
| 1 | 4.990799000  | -2.255954000 | -2.437943000 |
| 1 | 4.163473000  | -1.790318000 | 1.717557000  |
| 9 | 5.361231000  | -3.203864000 | -0.073055000 |

**9TS<sup>m(C-F)</sup>** (TE= -1700.404645)

|    |              |              |              |
|----|--------------|--------------|--------------|
| 6  | -0.441034000 | 1.639353000  | 1.288048000  |
| 7  | -0.156142000 | 0.931415000  | 0.043926000  |
| 15 | -1.497082000 | -0.026406000 | 0.361221000  |
| 6  | -1.588292000 | 0.963758000  | 1.757105000  |
| 7  | -2.595901000 | 0.052302000  | -0.880366000 |
| 7  | -1.205875000 | -1.638668000 | 0.520395000  |
| 6  | 0.201605000  | -1.676755000 | 2.610400000  |
| 1  | 1.098840000  | -1.618387000 | 1.990794000  |
| 1  | -0.031480000 | -0.671491000 | 2.966481000  |
| 1  | 0.424918000  | -2.305092000 | 3.476013000  |
| 6  | -2.227917000 | -2.371227000 | 2.644087000  |
| 1  | -3.002561000 | -2.908350000 | 2.091534000  |
| 1  | -2.045879000 | -2.903428000 | 3.580484000  |
| 1  | -2.612583000 | -1.380461000 | 2.895683000  |
| 6  | -1.656888000 | -3.699439000 | -0.798629000 |
| 1  | -2.729756000 | -3.502393000 | -0.757154000 |
| 1  | -1.439406000 | -4.187467000 | -1.751169000 |
| 1  | -1.412000000 | -4.413869000 | -0.008491000 |
| 6  | 0.648919000  | -2.708019000 | -0.733266000 |
| 1  | 1.230193000  | -1.786572000 | -0.657176000 |
| 1  | 0.965217000  | -3.377277000 | 0.071914000  |
| 1  | 0.904624000  | -3.192383000 | -1.678268000 |
| 6  | -4.215500000 | -1.410692000 | -2.065319000 |
| 1  | -5.038768000 | -2.109184000 | -1.899277000 |
| 1  | -4.557035000 | -0.676682000 | -2.799179000 |
| 1  | -3.382136000 | -1.964774000 | -2.501549000 |
| 6  | -4.964543000 | 0.018258000  | -0.133314000 |
| 1  | -4.674712000 | 0.427200000  | 0.838308000  |
| 1  | -5.277457000 | 0.850106000  | -0.769935000 |
| 1  | -5.832327000 | -0.628717000 | 0.012323000  |
| 6  | -2.450472000 | 1.208454000  | 2.935402000  |
| 1  | -2.060850000 | 0.774211000  | 3.866806000  |
| 1  | -2.573149000 | 2.281792000  | 3.113725000  |
| 1  | -3.455035000 | 0.798706000  | 2.794509000  |
| 6  | -0.952724000 | -2.278405000 | 1.830458000  |
| 6  | -0.839436000 | -2.426175000 | -0.680929000 |
| 1  | -0.659571000 | -3.302154000 | 1.580973000  |
| 1  | -1.085884000 | -1.787709000 | -1.536327000 |
| 6  | -3.819925000 | -0.765363000 | -0.750640000 |
| 1  | -3.566101000 | -1.571746000 | -0.055936000 |
| 6  | -2.683415000 | 1.193313000  | -1.821426000 |
| 1  | -3.689764000 | 1.118779000  | -2.243991000 |



|   |              |              |              |
|---|--------------|--------------|--------------|
| 6 | -1.705306000 | 1.030644000  | -2.967990000 |
| 1 | -1.865289000 | 0.079260000  | -3.480541000 |
| 1 | -1.838456000 | 1.835959000  | -3.695061000 |
| 1 | -0.668435000 | 1.062740000  | -2.617792000 |
| 6 | -2.603548000 | 2.568706000  | -1.180451000 |
| 1 | -3.302491000 | 2.661915000  | -0.346654000 |
| 1 | -1.601925000 | 2.796372000  | -0.811271000 |
| 1 | -2.860177000 | 3.322980000  | -1.928079000 |
| 5 | 0.970464000  | 1.434935000  | -0.672195000 |
| 6 | 0.453563000  | 2.637763000  | 1.448553000  |
| 1 | 0.591818000  | 3.372563000  | 2.224831000  |
| 6 | 1.779488000  | 3.914461000  | -0.324289000 |
| 6 | 2.666296000  | 3.284455000  | 0.337948000  |
| 7 | 1.343175000  | 2.618285000  | 0.284260000  |
| 6 | 1.045873000  | 4.909597000  | -1.087718000 |
| 1 | 1.663735000  | 5.781145000  | -1.299019000 |
| 1 | 0.699887000  | 4.475768000  | -2.030022000 |
| 1 | 0.165635000  | 5.228059000  | -0.522064000 |
| 6 | 3.916627000  | 2.977129000  | 1.018403000  |
| 1 | 4.340511000  | 2.051253000  | 0.621844000  |
| 1 | 4.628675000  | 3.791454000  | 0.892349000  |
| 1 | 3.730263000  | 2.829710000  | 2.085420000  |
| 1 | 2.138756000  | 0.798927000  | -1.109388000 |
| 6 | 3.223405000  | -0.081878000 | -0.596568000 |
| 6 | 3.839233000  | -0.922341000 | -1.516782000 |
| 6 | 3.270658000  | -0.446978000 | 0.746294000  |
| 6 | 4.489448000  | -2.060571000 | -1.084365000 |
| 1 | 3.817964000  | -0.715334000 | -2.586346000 |
| 6 | 3.926755000  | -1.594449000 | 1.171207000  |
| 1 | 2.767209000  | 0.169435000  | 1.494966000  |
| 6 | 4.549043000  | -2.420808000 | 0.247266000  |
| 1 | 3.951325000  | -1.858574000 | 2.225195000  |
| 1 | 5.067052000  | -3.326642000 | 0.538368000  |
| 9 | 5.090250000  | -2.859813000 | -1.985957000 |

**9TS<sup>o</sup>(C-F)** (TE= -1700.408961)

|    |              |              |              |
|----|--------------|--------------|--------------|
| 6  | -0.264272000 | 1.594074000  | 1.379176000  |
| 7  | -0.034085000 | 0.896820000  | 0.117754000  |
| 15 | -1.479887000 | 0.084194000  | 0.378206000  |
| 6  | -1.492731000 | 1.040314000  | 1.801360000  |
| 7  | -2.531095000 | 0.322958000  | -0.883021000 |
| 7  | -1.371146000 | -1.554074000 | 0.492758000  |
| 6  | 0.008119000  | -1.797127000 | 2.587510000  |

|   |              |              |              |
|---|--------------|--------------|--------------|
| 1 | 0.912409000  | -1.816425000 | 1.975500000  |
| 1 | -0.123146000 | -0.783549000 | 2.971049000  |
| 1 | 0.157726000  | -2.468629000 | 3.436364000  |
| 6 | -2.479910000 | -2.240146000 | 2.588788000  |
| 1 | -3.301736000 | -2.672626000 | 2.013107000  |
| 1 | -2.362854000 | -2.821361000 | 3.506258000  |
| 1 | -2.760022000 | -1.223753000 | 2.873868000  |
| 6 | -2.057980000 | -3.513523000 | -0.875108000 |
| 1 | -3.099704000 | -3.192109000 | -0.817992000 |
| 1 | -1.905243000 | -3.995416000 | -1.843229000 |
| 1 | -1.895145000 | -4.274908000 | -0.107958000 |
| 6 | 0.348619000  | -2.802668000 | -0.791303000 |
| 1 | 1.037369000  | -1.959780000 | -0.700219000 |
| 1 | 0.584691000  | -3.520704000 | -0.000877000 |
| 1 | 0.542632000  | -3.295315000 | -1.746587000 |
| 6 | -4.302473000 | -0.910126000 | -2.111627000 |
| 1 | -5.210868000 | -1.499290000 | -1.967227000 |
| 1 | -4.534522000 | -0.132218000 | -2.843057000 |
| 1 | -3.538730000 | -1.562097000 | -2.539710000 |
| 6 | -4.899858000 | 0.590210000  | -0.182268000 |
| 1 | -4.581774000 | 0.952243000  | 0.798903000  |
| 1 | -5.089047000 | 1.459433000  | -0.817814000 |
| 1 | -5.846585000 | 0.059238000  | -0.061371000 |
| 6 | -2.342912000 | 1.330521000  | 2.978200000  |
| 1 | -2.005531000 | 0.835663000  | 3.899719000  |
| 1 | -2.370516000 | 2.404758000  | 3.187768000  |
| 1 | -3.378390000 | 1.017654000  | 2.815145000  |
| 6 | -1.195533000 | -2.254411000 | 1.784597000  |
| 6 | -1.096189000 | -2.348676000 | -0.728455000 |
| 1 | -1.006542000 | -3.294922000 | 1.505995000  |
| 1 | -1.264986000 | -1.665298000 | -1.567141000 |
| 6 | -3.852785000 | -0.330316000 | -0.783777000 |
| 1 | -3.718754000 | -1.167526000 | -0.091279000 |
| 6 | -2.449837000 | 1.476332000  | -1.809894000 |
| 1 | -3.445582000 | 1.531600000  | -2.259505000 |
| 6 | -1.468393000 | 1.205040000  | -2.932763000 |
| 1 | -1.735989000 | 0.290549000  | -3.467050000 |
| 1 | -1.475250000 | 2.031549000  | -3.647971000 |
| 1 | -0.446328000 | 1.096657000  | -2.555723000 |
| 6 | -2.217497000 | 2.823896000  | -1.146617000 |
| 1 | -2.922805000 | 2.993925000  | -0.330619000 |
| 1 | -1.206245000 | 2.919675000  | -0.746946000 |

|   |              |              |              |
|---|--------------|--------------|--------------|
| 1 | -2.356610000 | 3.613004000  | -1.889300000 |
| 5 | 1.168938000  | 1.259705000  | -0.550731000 |
| 6 | 0.744770000  | 2.465702000  | 1.592410000  |
| 1 | 0.957086000  | 3.151682000  | 2.396111000  |
| 6 | 2.273919000  | 3.607178000  | -0.110290000 |
| 6 | 3.053437000  | 2.852138000  | 0.554739000  |
| 7 | 1.657115000  | 2.361304000  | 0.449339000  |
| 6 | 1.696575000  | 4.704261000  | -0.867668000 |
| 1 | 2.423953000  | 5.498082000  | -1.031270000 |
| 1 | 1.336889000  | 4.339960000  | -1.834016000 |
| 1 | 0.840940000  | 5.114088000  | -0.323821000 |
| 6 | 4.233399000  | 2.363869000  | 1.253314000  |
| 1 | 4.565816000  | 1.420998000  | 0.812031000  |
| 1 | 5.038338000  | 3.095512000  | 1.200449000  |
| 1 | 3.990756000  | 2.175881000  | 2.302370000  |
| 1 | 2.297665000  | 0.460954000  | -1.027575000 |
| 6 | 3.255558000  | -0.552699000 | -0.626634000 |
| 6 | 3.794192000  | -1.463067000 | -1.506092000 |
| 6 | 3.226720000  | -0.959150000 | 0.703647000  |
| 6 | 4.297728000  | -2.699256000 | -1.145355000 |
| 6 | 3.728576000  | -2.184012000 | 1.126605000  |
| 1 | 2.770920000  | -0.302801000 | 1.450899000  |
| 6 | 4.264188000  | -3.058981000 | 0.194015000  |
| 1 | 3.692213000  | -2.462042000 | 2.175722000  |
| 1 | 4.653332000  | -4.022495000 | 0.503462000  |
| 9 | 3.838596000  | -1.150390000 | -2.824807000 |
| 1 | 4.708317000  | -3.363066000 | -1.899508000 |

Cartesian coordinates of the H–H splitting product obtained from **4-7**, **9**, **II**, **IIIa** and **IIIb**, along with their total energies (in hartrees) including zero point vibrational correction.

**4P<sup>H-H</sup>** (TE= -1714.746663)

|    |             |              |              |
|----|-------------|--------------|--------------|
| 6  | 0.930073000 | -0.653873000 | 0.883547000  |
| 6  | 2.811308000 | -0.936245000 | -0.441532000 |
| 7  | 0.584358000 | -0.010808000 | -0.318462000 |
| 7  | 2.181956000 | -1.096670000 | 0.886053000  |
| 6  | 2.624007000 | -2.108202000 | 1.813128000  |
| 1  | 3.606511000 | -1.866080000 | 2.225086000  |
| 1  | 1.919099000 | -2.197780000 | 2.641819000  |
| 1  | 2.704789000 | -3.071959000 | 1.300255000  |
| 15 | 4.060874000 | 0.220160000  | -0.469675000 |
| 6  | 5.334104000 | -0.049660000 | 0.788083000  |

|    |              |              |              |
|----|--------------|--------------|--------------|
| 1  | 6.153072000  | 0.661703000  | 0.665548000  |
| 1  | 4.895977000  | 0.093418000  | 1.778126000  |
| 1  | 5.716470000  | -1.067883000 | 0.711816000  |
| 6  | 3.721557000  | 2.011399000  | -0.265614000 |
| 1  | 4.621372000  | 2.621246000  | -0.378899000 |
| 1  | 2.978904000  | 2.312892000  | -1.007339000 |
| 1  | 3.303076000  | 2.178628000  | 0.729477000  |
| 6  | 4.892755000  | 0.136491000  | -2.062373000 |
| 1  | 5.668048000  | 0.901590000  | -2.131359000 |
| 1  | 5.331361000  | -0.852727000 | -2.189251000 |
| 1  | 4.151502000  | 0.294447000  | -2.846766000 |
| 15 | -0.980146000 | -0.055543000 | 0.241488000  |
| 6  | -0.234285000 | -0.712244000 | 1.658069000  |
| 7  | -1.666898000 | 1.451687000  | 0.203020000  |
| 7  | -2.053823000 | -1.016021000 | -0.564206000 |
| 6  | -1.022287000 | -3.290952000 | -0.157343000 |
| 1  | -0.357475000 | -3.087996000 | -1.000437000 |
| 1  | -0.460195000 | -3.106120000 | 0.760354000  |
| 1  | -1.300182000 | -4.347599000 | -0.177413000 |
| 6  | -3.145323000 | -2.576456000 | 1.005728000  |
| 1  | -4.101308000 | -2.065424000 | 0.870169000  |
| 1  | -3.346696000 | -3.629310000 | 1.217346000  |
| 1  | -2.651960000 | -2.150322000 | 1.881939000  |
| 6  | -4.067997000 | -0.705239000 | -1.980967000 |
| 1  | -4.574615000 | -0.216511000 | -1.146101000 |
| 1  | -4.419260000 | -0.244183000 | -2.906793000 |
| 1  | -4.382590000 | -1.751831000 | -2.003272000 |
| 6  | -1.850965000 | -1.250470000 | -3.033910000 |
| 1  | -0.770672000 | -1.098991000 | -2.974024000 |
| 1  | -2.041685000 | -2.327544000 | -3.043304000 |
| 1  | -2.211504000 | -0.846024000 | -3.982550000 |
| 6  | -3.912450000 | 2.454198000  | -0.125375000 |
| 1  | -4.944203000 | 2.409457000  | 0.230466000  |
| 1  | -3.610831000 | 3.504364000  | -0.108941000 |
| 1  | -3.894482000 | 2.112477000  | -1.162043000 |
| 6  | -3.013788000 | 2.089628000  | 2.191827000  |
| 1  | -2.400617000 | 1.441492000  | 2.822948000  |
| 1  | -2.617970000 | 3.106280000  | 2.263424000  |
| 1  | -4.028462000 | 2.103093000  | 2.595907000  |
| 6  | -0.543225000 | -1.134505000 | 3.045669000  |
| 1  | -0.627464000 | -2.223038000 | 3.173178000  |
| 1  | 0.215943000  | -0.788195000 | 3.754235000  |
| 1  | -1.493595000 | -0.708839000 | 3.380855000  |
| 6  | -2.278614000 | -2.439565000 | -0.230264000 |
| 6  | -2.559621000 | -0.566435000 | -1.881199000 |
| 1  | -2.859593000 | -2.825857000 | -1.072637000 |

|   |              |              |              |
|---|--------------|--------------|--------------|
| 1 | -2.321733000 | 0.500430000  | -1.937417000 |
| 6 | -3.024994000 | 1.594421000  | 0.756579000  |
| 1 | -3.449407000 | 0.583548000  | 0.761014000  |
| 6 | -0.865618000 | 2.687686000  | 0.069130000  |
| 1 | -1.574755000 | 3.498058000  | 0.265487000  |
| 6 | -0.369398000 | 2.863008000  | -1.353430000 |
| 1 | -1.207854000 | 2.870554000  | -2.054351000 |
| 1 | 0.165625000  | 3.810918000  | -1.453597000 |
| 1 | 0.310827000  | 2.055805000  | -1.636568000 |
| 6 | 0.248928000  | 2.824626000  | 1.091915000  |
| 1 | -0.129255000 | 2.715742000  | 2.110213000  |
| 1 | 1.021261000  | 2.072361000  | 0.927885000  |
| 1 | 0.710585000  | 3.811304000  | 1.001245000  |
| 5 | 1.572439000  | -0.603293000 | -1.448501000 |
| 1 | 1.805220000  | 0.235404000  | -2.310768000 |
| 1 | 1.061444000  | -1.596760000 | -1.954510000 |

**5P<sup>H-H</sup>** (TE= -1333.582679)

|    |              |              |              |
|----|--------------|--------------|--------------|
| 6  | -1.620748000 | -0.131047000 | 0.692164000  |
| 6  | -3.424612000 | -0.269450000 | -0.799204000 |
| 7  | -1.005292000 | -0.375161000 | -0.541320000 |
| 7  | -2.937665000 | -0.074389000 | 0.605327000  |
| 6  | -3.802938000 | 0.182825000  | 1.724364000  |
| 1  | -4.582856000 | -0.580332000 | 1.798963000  |
| 1  | -3.226867000 | 0.168709000  | 2.648943000  |
| 1  | -4.290444000 | 1.158644000  | 1.637511000  |
| 15 | 0.423295000  | -0.030798000 | 0.220715000  |
| 6  | -0.595058000 | 0.068539000  | 1.619918000  |
| 7  | 1.527919000  | -1.238707000 | 0.017168000  |
| 7  | 1.215206000  | 1.346479000  | -0.227326000 |
| 6  | -0.631016000 | 3.020465000  | 0.243246000  |
| 1  | -1.075209000 | 2.734393000  | -0.713590000 |
| 1  | -1.186832000 | 2.515142000  | 1.036340000  |
| 1  | -0.760233000 | 4.097131000  | 0.376274000  |
| 6  | 1.457278000  | 2.922761000  | 1.657153000  |
| 1  | 2.540080000  | 2.780608000  | 1.632577000  |
| 1  | 1.252140000  | 3.941368000  | 1.995005000  |
| 1  | 1.039943000  | 2.237164000  | 2.396819000  |
| 6  | 3.339534000  | 2.026171000  | -1.312971000 |
| 1  | 3.889088000  | 1.624387000  | -0.458548000 |
| 1  | 3.946319000  | 1.875586000  | -2.208627000 |
| 1  | 3.234718000  | 3.105019000  | -1.172873000 |
| 6  | 1.209981000  | 1.882775000  | -2.654981000 |
| 1  | 0.271105000  | 1.337496000  | -2.782991000 |
| 1  | 0.969479000  | 2.941392000  | -2.522226000 |
| 1  | 1.793411000  | 1.792053000  | -3.574006000 |

|   |              |              |              |
|---|--------------|--------------|--------------|
| 6 | 4.003295000  | -1.399244000 | 0.040644000  |
| 1 | 4.885034000  | -1.217378000 | 0.658768000  |
| 1 | 4.061502000  | -2.432521000 | -0.310224000 |
| 1 | 4.055678000  | -0.742264000 | -0.829425000 |
| 6 | 2.669818000  | -2.051980000 | 2.068113000  |
| 1 | 1.768452000  | -1.848422000 | 2.650929000  |
| 1 | 2.662361000  | -3.108198000 | 1.786351000  |
| 1 | 3.538902000  | -1.890262000 | 2.709452000  |
| 6 | -0.530351000 | 0.305628000  | 3.083078000  |
| 1 | -0.938938000 | 1.277939000  | 3.391100000  |
| 1 | -1.059733000 | -0.462288000 | 3.656445000  |
| 1 | 0.506835000  | 0.281187000  | 3.428066000  |
| 6 | 0.851548000  | 2.686445000  | 0.288570000  |
| 6 | 2.000568000  | 1.334049000  | -1.482899000 |
| 1 | 1.338470000  | 3.381317000  | -0.401186000 |
| 1 | 2.203710000  | 0.280077000  | -1.689644000 |
| 6 | 2.743279000  | -1.150475000 | 0.848818000  |
| 1 | 2.783944000  | -0.112885000 | 1.207577000  |
| 6 | 1.211093000  | -2.549431000 | -0.589437000 |
| 1 | 2.111263000  | -3.149376000 | -0.421526000 |
| 6 | 1.026063000  | -2.423375000 | -2.088428000 |
| 1 | 1.913820000  | -1.986873000 | -2.553001000 |
| 1 | 0.859518000  | -3.407475000 | -2.532501000 |
| 1 | 0.160424000  | -1.800059000 | -2.328756000 |
| 6 | 0.058935000  | -3.290294000 | 0.067532000  |
| 1 | 0.171580000  | -3.321383000 | 1.152755000  |
| 1 | -0.896465000 | -2.818622000 | -0.167831000 |
| 1 | 0.028929000  | -4.317779000 | -0.302168000 |
| 5 | -2.043210000 | -0.083658000 | -1.691402000 |
| 6 | -4.018186000 | -1.662881000 | -0.910934000 |
| 1 | -4.855533000 | -1.822221000 | -0.219656000 |
| 1 | -4.390758000 | -1.825450000 | -1.925383000 |
| 1 | -3.258359000 | -2.424724000 | -0.712925000 |
| 6 | -4.467480000 | 0.779372000  | -1.124022000 |
| 1 | -4.713649000 | 0.720460000  | -2.187121000 |
| 1 | -5.400848000 | 0.646516000  | -0.562279000 |
| 1 | -4.082979000 | 1.785256000  | -0.932733000 |
| 1 | -1.932931000 | 1.063750000  | -2.107447000 |
| 1 | -1.954639000 | -0.889494000 | -2.602208000 |

**6P<sup>H-H</sup>** (TE= -1501.960707)

|   |             |              |              |
|---|-------------|--------------|--------------|
| 6 | 0.732103000 | -0.916026000 | 0.813482000  |
| 7 | 0.466443000 | -0.220986000 | -0.374078000 |
| 7 | 1.930118000 | -1.499757000 | 0.777288000  |
| 6 | 2.313329000 | -2.645969000 | 1.557334000  |
| 1 | 3.359750000 | -2.566997000 | 1.859168000  |

|    |              |              |              |
|----|--------------|--------------|--------------|
| 1  | 1.692005000  | -2.694020000 | 2.452295000  |
| 1  | 2.182446000  | -3.564046000 | 0.976577000  |
| 15 | -1.072621000 | -0.026612000 | 0.223453000  |
| 6  | -0.397426000 | -0.832447000 | 1.612033000  |
| 7  | -1.477002000 | 1.570067000  | 0.213534000  |
| 7  | -2.287585000 | -0.799037000 | -0.568178000 |
| 6  | -1.762727000 | -3.228507000 | -0.116270000 |
| 1  | -1.109837000 | -3.205404000 | -0.991504000 |
| 1  | -1.133078000 | -3.136671000 | 0.770865000  |
| 1  | -2.259790000 | -4.200723000 | -0.079667000 |
| 6  | -3.641342000 | -2.036438000 | 1.080192000  |
| 1  | -4.471877000 | -1.339282000 | 0.947671000  |
| 1  | -4.053131000 | -3.014210000 | 1.339837000  |
| 1  | -3.041439000 | -1.694660000 | 1.927040000  |
| 6  | -4.160714000 | -0.115456000 | -2.048299000 |
| 1  | -4.566716000 | 0.495182000  | -1.239333000 |
| 1  | -4.386172000 | 0.381755000  | -2.994038000 |
| 1  | -4.692007000 | -1.070549000 | -2.052692000 |
| 6  | -2.096697000 | -1.173191000 | -3.018554000 |
| 1  | -1.011559000 | -1.262830000 | -2.933963000 |
| 1  | -2.526660000 | -2.178472000 | -2.998268000 |
| 1  | -2.333616000 | -0.736465000 | -3.991065000 |
| 6  | -3.475774000 | 2.984081000  | -0.184021000 |
| 1  | -4.515199000 | 3.123397000  | 0.121016000  |
| 1  | -2.986016000 | 3.958318000  | -0.117262000 |
| 1  | -3.466961000 | 2.670379000  | -1.229750000 |
| 6  | -2.781685000 | 2.385308000  | 2.159907000  |
| 1  | -2.349783000 | 1.602995000  | 2.789852000  |
| 1  | -2.189239000 | 3.293969000  | 2.295266000  |
| 1  | -3.792222000 | 2.594348000  | 2.517242000  |
| 6  | -0.700916000 | -1.201140000 | 3.015470000  |
| 1  | -1.027189000 | -2.242127000 | 3.139442000  |
| 1  | 0.170887000  | -1.057284000 | 3.660014000  |
| 1  | -1.495607000 | -0.571934000 | 3.426032000  |
| 6  | -2.808376000 | -2.128593000 | -0.182389000 |
| 6  | -2.660748000 | -0.301774000 | -1.913697000 |
| 1  | -3.488589000 | -2.397328000 | -0.995586000 |
| 1  | -2.193751000 | 0.685359000  | -2.001733000 |
| 6  | -2.814753000 | 1.949197000  | 0.706988000  |
| 1  | -3.419282000 | 1.037447000  | 0.650847000  |
| 6  | -0.462703000 | 2.652246000  | 0.136677000  |
| 1  | -1.021675000 | 3.559041000  | 0.386003000  |
| 6  | 0.056694000  | 2.816848000  | -1.277868000 |
| 1  | -0.767947000 | 2.972437000  | -1.977627000 |
| 1  | 0.719853000  | 3.683051000  | -1.334735000 |
| 1  | 0.624271000  | 1.938426000  | -1.593575000 |

|   |             |              |              |
|---|-------------|--------------|--------------|
| 6 | 0.663079000 | 2.545463000  | 1.150361000  |
| 1 | 0.279879000 | 2.368300000  | 2.157643000  |
| 1 | 1.359884000 | 1.745489000  | 0.894042000  |
| 1 | 1.225362000 | 3.481690000  | 1.160568000  |
| 5 | 1.358776000 | -0.967958000 | -1.459603000 |
| 7 | 2.547232000 | -1.300439000 | -0.481603000 |
| 6 | 3.661967000 | -0.460054000 | -0.413437000 |
| 6 | 4.370763000 | -0.202614000 | -1.592508000 |
| 6 | 4.129951000 | 0.111319000  | 0.771353000  |
| 6 | 5.489143000 | 0.603648000  | -1.582689000 |
| 1 | 4.022764000 | -0.650969000 | -2.515440000 |
| 6 | 5.259718000 | 0.914613000  | 0.769642000  |
| 1 | 3.596264000 | -0.061533000 | 1.698199000  |
| 6 | 5.948664000 | 1.171618000  | -0.401165000 |
| 1 | 6.015931000 | 0.788392000  | -2.512746000 |
| 1 | 5.597995000 | 1.349206000  | 1.704395000  |
| 1 | 6.830744000 | 1.800647000  | -0.397274000 |
| 1 | 0.807761000 | -1.994029000 | -1.821652000 |
| 1 | 1.685247000 | -0.253056000 | -2.373881000 |

**7P<sup>H-H</sup>** (TE= -600.111808)

|   |              |              |              |
|---|--------------|--------------|--------------|
| 6 | -1.523341000 | -1.490932000 | -0.001390000 |
| 6 | -0.184988000 | -1.524343000 | -0.001481000 |
| 1 | -2.242431000 | -2.295628000 | -0.002396000 |
| 1 | 0.390557000  | -2.440322000 | -0.002399000 |
| 6 | -3.234897000 | 0.271148000  | -0.637601000 |
| 6 | -3.234788000 | 0.270011000  | 0.638262000  |
| 7 | -1.958408000 | -0.114907000 | -0.000113000 |
| 7 | 0.418706000  | -0.301437000 | -0.000327000 |
| 5 | -0.656373000 | 0.820259000  | 0.000626000  |
| 6 | 1.781464000  | -0.096011000 | -0.000107000 |
| 6 | 2.720190000  | -1.135455000 | -0.000569000 |
| 6 | 2.263986000  | 1.218717000  | 0.000656000  |
| 6 | 4.074663000  | -0.862576000 | -0.000334000 |
| 1 | 2.396396000  | -2.169128000 | -0.001068000 |
| 6 | 3.621019000  | 1.476814000  | 0.000896000  |
| 1 | 1.554114000  | 2.037287000  | 0.001041000  |
| 6 | 4.542963000  | 0.442150000  | 0.000394000  |
| 1 | 4.776801000  | -1.689424000 | -0.000702000 |
| 1 | 3.961632000  | 2.506592000  | 0.001486000  |
| 1 | 5.606482000  | 0.647380000  | 0.000583000  |
| 6 | -3.637532000 | 0.419174000  | 2.027428000  |
| 1 | -2.979827000 | 1.136103000  | 2.525259000  |
| 1 | -4.666772000 | 0.766384000  | 2.102060000  |
| 1 | -3.544938000 | -0.535052000 | 2.551854000  |
| 6 | -3.637683000 | 0.422797000  | -2.026487000 |



|   |              |              |              |
|---|--------------|--------------|--------------|
| 1 | -4.666863000 | 0.770316000  | -2.100505000 |
| 1 | -2.979852000 | 1.140470000  | -2.523078000 |
| 1 | -3.545269000 | -0.530533000 | -2.552574000 |
| 1 | -0.653250000 | 1.499018000  | 1.008895000  |
| 1 | -0.653322000 | 1.500695000  | -1.006518000 |

**9p<sup>H-H</sup>** (TE= -1370.379621)

|    |              |              |              |
|----|--------------|--------------|--------------|
| 6  | -1.324350000 | 0.093865000  | 1.139981000  |
| 7  | -0.899858000 | -0.123113000 | -0.224985000 |
| 15 | 0.644200000  | 0.015771000  | 0.312959000  |
| 6  | -0.097717000 | 0.170869000  | 1.846879000  |
| 7  | 1.553568000  | -1.315250000 | -0.105195000 |
| 7  | 1.557468000  | 1.275962000  | -0.269360000 |
| 6  | 0.010693000  | 3.139590000  | 0.457165000  |
| 1  | -0.579545000 | 2.965365000  | -0.445733000 |
| 1  | -0.495834000 | 2.641378000  | 1.286208000  |
| 1  | 0.024640000  | 4.213735000  | 0.658295000  |
| 6  | 2.245529000  | 2.775198000  | 1.564929000  |
| 1  | 3.287082000  | 2.493028000  | 1.393208000  |
| 1  | 2.223422000  | 3.806263000  | 1.926525000  |
| 1  | 1.843178000  | 2.135689000  | 2.352849000  |
| 6  | 3.552588000  | 1.716865000  | -1.676840000 |
| 1  | 4.176737000  | 1.237661000  | -0.919001000 |
| 1  | 3.989203000  | 1.510571000  | -2.656923000 |
| 1  | 3.602074000  | 2.797910000  | -1.522845000 |
| 6  | 1.239453000  | 1.849637000  | -2.666131000 |
| 1  | 0.232420000  | 1.424308000  | -2.642252000 |
| 1  | 1.154086000  | 2.927835000  | -2.503438000 |
| 1  | 1.653345000  | 1.700684000  | -3.666233000 |
| 6  | 3.956669000  | -1.818833000 | -0.453247000 |
| 1  | 4.937518000  | -1.782038000 | 0.026142000  |
| 1  | 3.809558000  | -2.840921000 | -0.811914000 |
| 1  | 3.975914000  | -1.155633000 | -1.320207000 |
| 6  | 2.868764000  | -2.309966000 | 1.757272000  |
| 1  | 2.100398000  | -1.994155000 | 2.466571000  |
| 1  | 2.676712000  | -3.352230000 | 1.488382000  |
| 1  | 3.838362000  | -2.275019000 | 2.259245000  |
| 6  | 0.217092000  | 0.342078000  | 3.283103000  |
| 1  | -0.026478000 | 1.342690000  | 3.671264000  |
| 1  | -0.317536000 | -0.377834000 | 3.913542000  |
| 1  | 1.283498000  | 0.186456000  | 3.472880000  |
| 6  | 1.436255000  | 2.639430000  | 0.290551000  |
| 6  | 2.129861000  | 1.191483000  | -1.627689000 |
| 1  | 1.903930000  | 3.288329000  | -0.455856000 |
| 1  | 2.169671000  | 0.124490000  | -1.860411000 |
| 6  | 2.877467000  | -1.410084000 | 0.533143000  |

|   |              |              |              |
|---|--------------|--------------|--------------|
| 1 | 3.116132000  | -0.394055000 | 0.875600000  |
| 6 | 0.966789000  | -2.566466000 | -0.621227000 |
| 1 | 1.782910000  | -3.295169000 | -0.571259000 |
| 6 | 0.588986000  | -2.422375000 | -2.082779000 |
| 1 | 1.455303000  | -2.122874000 | -2.678022000 |
| 1 | 0.216701000  | -3.371471000 | -2.476574000 |
| 1 | -0.198974000 | -1.676418000 | -2.212514000 |
| 6 | -0.175328000 | -3.136635000 | 0.206282000  |
| 1 | 0.091995000  | -3.203183000 | 1.262430000  |
| 1 | -1.072975000 | -2.520845000 | 0.119670000  |
| 1 | -0.413115000 | -4.142224000 | -0.149834000 |
| 5 | -2.049007000 | 0.170071000  | -1.193396000 |
| 6 | -2.672055000 | 0.190437000  | 1.226840000  |
| 1 | -3.323624000 | 0.355646000  | 2.071019000  |
| 6 | -4.454529000 | -0.743607000 | -0.323359000 |
| 6 | -4.601070000 | 0.525249000  | -0.377890000 |
| 7 | -3.236215000 | 0.069771000  | -0.111473000 |
| 6 | -4.689615000 | -2.177764000 | -0.316484000 |
| 1 | -5.745184000 | -2.416017000 | -0.440327000 |
| 1 | -4.119211000 | -2.651070000 | -1.120865000 |
| 1 | -4.338766000 | -2.599345000 | 0.629621000  |
| 6 | -5.209415000 | 1.844645000  | -0.483226000 |
| 1 | -4.773962000 | 2.393610000  | -1.321613000 |
| 1 | -6.286902000 | 1.774145000  | -0.624708000 |
| 1 | -5.006762000 | 2.418578000  | 0.424829000  |
| 1 | -2.056337000 | 1.303290000  | -1.656259000 |
| 1 | -2.228709000 | -0.671370000 | -2.055465000 |

**II-P<sup>H-H</sup>** (TE= -600.325466)

|   |              |              |              |
|---|--------------|--------------|--------------|
| 6 | -0.836577000 | 1.216716000  | 0.224198000  |
| 6 | -2.259154000 | 0.707244000  | 0.518746000  |
| 6 | -2.369445000 | -0.697062000 | -0.066468000 |
| 6 | -0.950329000 | -1.191846000 | 0.151062000  |
| 7 | -0.112048000 | -0.039614000 | -0.109202000 |
| 1 | -3.022065000 | 1.389500000  | 0.132449000  |
| 1 | -2.400915000 | 0.643556000  | 1.603275000  |
| 6 | 1.262885000  | -0.188794000 | -0.078014000 |
| 6 | 2.146567000  | 0.869987000  | -0.339954000 |
| 6 | 3.514129000  | 0.681880000  | -0.333709000 |
| 6 | 4.068167000  | -0.561668000 | -0.074803000 |
| 6 | 3.212237000  | -1.616517000 | 0.183541000  |
| 6 | 1.840061000  | -1.440209000 | 0.189004000  |
| 1 | 1.765338000  | 1.854407000  | -0.567137000 |
| 1 | 4.157730000  | 1.529159000  | -0.544276000 |
| 1 | 5.141885000  | -0.702943000 | -0.075933000 |
| 1 | 3.612702000  | -2.602175000 | 0.394740000  |

|   |              |              |              |
|---|--------------|--------------|--------------|
| 1 | 1.211371000  | -2.291711000 | 0.411202000  |
| 6 | -2.709205000 | -0.690217000 | -1.551030000 |
| 1 | -2.832493000 | -1.714179000 | -1.914944000 |
| 1 | -3.645299000 | -0.154594000 | -1.732775000 |
| 1 | -1.925354000 | -0.222295000 | -2.148435000 |
| 6 | -3.386362000 | -1.541670000 | 0.676053000  |
| 1 | -4.394879000 | -1.141375000 | 0.539186000  |
| 1 | -3.386032000 | -2.570790000 | 0.305159000  |
| 1 | -3.175020000 | -1.566954000 | 1.748363000  |
| 6 | -0.868425000 | 2.207650000  | -0.934990000 |
| 1 | 0.121124000  | 2.566664000  | -1.214929000 |
| 1 | -1.326927000 | 1.767769000  | -1.821371000 |
| 1 | -1.463293000 | 3.078364000  | -0.646243000 |
| 6 | -0.277423000 | 1.883579000  | 1.474538000  |
| 1 | -0.959034000 | 2.673641000  | 1.800210000  |
| 1 | -0.189912000 | 1.154042000  | 2.284668000  |
| 1 | 0.703120000  | 2.333140000  | 1.315868000  |
| 1 | -0.830728000 | -1.559651000 | 1.186708000  |
| 1 | -0.699732000 | -2.020715000 | -0.520414000 |

**IIIa-P<sup>H-H</sup>** (TE= -1010.628621)

|    |              |              |              |
|----|--------------|--------------|--------------|
| 13 | 0.000000000  | 0.000000000  | 0.949504000  |
| 7  | 0.000000000  | 1.408395000  | -0.335952000 |
| 7  | 0.000000000  | -1.408395000 | -0.335952000 |
| 6  | 0.000000000  | 1.251492000  | -1.651690000 |
| 6  | 0.000000000  | -1.251492000 | -1.651690000 |
| 6  | 0.000000000  | 0.000000000  | -2.272088000 |
| 1  | 0.000000000  | 0.000000000  | -3.353330000 |
| 6  | 0.000000000  | 2.710673000  | 0.239599000  |
| 6  | 1.201152000  | 3.330852000  | 0.557153000  |
| 6  | -1.201152000 | 3.330852000  | 0.557153000  |
| 6  | 1.198667000  | 4.576427000  | 1.161027000  |
| 6  | -1.198667000 | 4.576427000  | 1.161027000  |
| 6  | 0.000000000  | 5.202914000  | 1.460875000  |
| 1  | 2.139174000  | 5.057114000  | 1.403744000  |
| 1  | -2.139174000 | 5.057114000  | 1.403744000  |
| 1  | 0.000000000  | 6.176121000  | 1.937220000  |
| 6  | 0.000000000  | -2.710673000 | 0.239599000  |
| 6  | -1.201152000 | -3.330852000 | 0.557153000  |
| 6  | 1.201152000  | -3.330852000 | 0.557153000  |
| 6  | -1.198667000 | -4.576427000 | 1.161027000  |
| 6  | 1.198667000  | -4.576427000 | 1.161027000  |
| 6  | 0.000000000  | -5.202914000 | 1.460875000  |
| 1  | -2.139174000 | -5.057114000 | 1.403744000  |
| 1  | 2.139174000  | -5.057114000 | 1.403744000  |
| 1  | 0.000000000  | -6.176121000 | 1.937220000  |

|   |              |              |              |
|---|--------------|--------------|--------------|
| 6 | 0.000000000  | -2.461048000 | -2.529947000 |
| 1 | 0.000000000  | -2.183214000 | -3.581387000 |
| 1 | 0.875545000  | -3.082684000 | -2.329263000 |
| 1 | -0.875545000 | -3.082684000 | -2.329263000 |
| 6 | 0.000000000  | 2.461048000  | -2.529947000 |
| 1 | 0.000000000  | 2.183214000  | -3.581387000 |
| 1 | -0.875545000 | 3.082684000  | -2.329263000 |
| 1 | 0.875545000  | 3.082684000  | -2.329263000 |
| 1 | 2.131453000  | -2.821844000 | 0.327575000  |
| 1 | -2.131453000 | -2.821844000 | 0.327575000  |
| 1 | -2.131453000 | 2.821844000  | 0.327575000  |
| 1 | 2.131453000  | 2.821844000  | 0.327575000  |
| 1 | 1.357826000  | 0.000000000  | 1.781693000  |
| 1 | -1.357826000 | 0.000000000  | 1.781693000  |

**IIIb-P<sup>H-H</sup>** (TE= -2692.983213)

|   |              |              |              |
|---|--------------|--------------|--------------|
| 7 | -0.000044000 | -0.439596000 | -1.444195000 |
| 7 | -0.000044000 | -0.439596000 | 1.444195000  |
| 6 | -0.000022000 | -1.747161000 | -1.258536000 |
| 6 | -0.000022000 | -1.747161000 | 1.258536000  |
| 6 | -0.000017000 | -2.356726000 | 0.000000000  |
| 1 | -0.000035000 | -3.438044000 | 0.000000000  |
| 6 | -0.000039000 | 0.123244000  | -2.746968000 |
| 6 | 1.200867000  | 0.436251000  | -3.370918000 |
| 6 | -1.200945000 | 0.436436000  | -3.370827000 |
| 6 | 1.198415000  | 1.031473000  | -4.620630000 |
| 6 | -1.198502000 | 1.031658000  | -4.620536000 |
| 6 | -0.000044000 | 1.327677000  | -5.249440000 |
| 1 | 2.139050000  | 1.269707000  | -5.103488000 |
| 1 | -2.139138000 | 1.270039000  | -5.103319000 |
| 1 | -0.000044000 | 1.796844000  | -6.226126000 |
| 6 | -0.000039000 | 0.123244000  | 2.746968000  |
| 6 | -1.200945000 | 0.436436000  | 3.370827000  |
| 6 | 1.200867000  | 0.436251000  | 3.370918000  |
| 6 | -1.198502000 | 1.031658000  | 4.620536000  |
| 6 | 1.198415000  | 1.031473000  | 4.620630000  |
| 6 | -0.000044000 | 1.327677000  | 5.249440000  |
| 1 | -2.139138000 | 1.270039000  | 5.103319000  |
| 1 | 2.139050000  | 1.269707000  | 5.103488000  |
| 1 | -0.000044000 | 1.796844000  | 6.226126000  |
| 6 | -0.000044000 | -2.644554000 | 2.456589000  |
| 1 | -0.000046000 | -3.691822000 | 2.163282000  |
| 1 | 0.875717000  | -2.453579000 | 3.080882000  |
| 1 | -0.875834000 | -2.453561000 | 3.080839000  |

|    |              |              |              |
|----|--------------|--------------|--------------|
| 6  | -0.000044000 | -2.644554000 | -2.456589000 |
| 1  | -0.000046000 | -3.691822000 | -2.163282000 |
| 1  | -0.875834000 | -2.453561000 | -3.080839000 |
| 1  | 0.875717000  | -2.453579000 | -3.080882000 |
| 1  | 2.131381000  | 0.208732000  | 2.861145000  |
| 1  | -2.131450000 | 0.209054000  | 2.860977000  |
| 1  | -2.131450000 | 0.209054000  | -2.860977000 |
| 1  | 2.131381000  | 0.208732000  | -2.861145000 |
| 31 | 0.000148000  | 0.907438000  | 0.000000000  |
| 1  | 1.377846000  | 1.675228000  | 0.000000000  |
| 1  | -1.377189000 | 1.675827000  | 0.000000000  |

Cartesian coordinates of the N–H splitting product obtained from **4-7**, **9** and **II**, along with their total energies (in hartrees) including zero point vibrational correction.

**4P<sup>N-H</sup>** (TE= -1770.102805)

|    |              |              |              |
|----|--------------|--------------|--------------|
| 6  | -0.840595000 | -0.669287000 | -0.960749000 |
| 6  | -2.759477000 | -0.903950000 | 0.313866000  |
| 7  | -0.519876000 | -0.011345000 | 0.235811000  |
| 7  | -2.101853000 | -1.096643000 | -0.993455000 |
| 6  | -2.500277000 | -2.161164000 | -1.882294000 |
| 1  | -3.473891000 | -1.959276000 | -2.334270000 |
| 1  | -1.769629000 | -2.277729000 | -2.684977000 |
| 1  | -2.576808000 | -3.101147000 | -1.325522000 |
| 15 | -4.050694000 | 0.198126000  | 0.252580000  |
| 6  | -5.221924000 | -0.142330000 | -1.085764000 |
| 1  | -6.075501000 | 0.535554000  | -1.022790000 |
| 1  | -4.727496000 | 0.010976000  | -2.047106000 |
| 1  | -5.566801000 | -1.174495000 | -1.020741000 |
| 6  | -3.802930000 | 2.007937000  | 0.016599000  |
| 1  | -4.744884000 | 2.562891000  | 0.007786000  |
| 1  | -3.158583000 | 2.400940000  | 0.805730000  |
| 1  | -3.293865000 | 2.159604000  | -0.938380000 |
| 6  | -5.005016000 | 0.093232000  | 1.776618000  |
| 1  | -5.772478000 | 0.868762000  | 1.805947000  |
| 1  | -5.468791000 | -0.890977000 | 1.836837000  |
| 1  | -4.329728000 | 0.210044000  | 2.624466000  |
| 15 | 1.056126000  | -0.065336000 | -0.294028000 |
| 6  | 0.335890000  | -0.752855000 | -1.711727000 |
| 7  | 1.735423000  | 1.446133000  | -0.272921000 |
| 7  | 2.107999000  | -1.009402000 | 0.555381000  |
| 6  | 1.228074000  | -3.326693000 | 0.071930000  |

|   |              |              |              |
|---|--------------|--------------|--------------|
| 1 | 0.543432000  | -3.192795000 | 0.912295000  |
| 1 | 0.665212000  | -3.137168000 | -0.844263000 |
| 1 | 1.565822000  | -4.365937000 | 0.056203000  |
| 6 | 3.330478000  | -2.457309000 | -1.024061000 |
| 1 | 4.253909000  | -1.900423000 | -0.848319000 |
| 1 | 3.593934000  | -3.490418000 | -1.262830000 |
| 1 | 2.836355000  | -2.030331000 | -1.899970000 |
| 6 | 4.013803000  | -0.587385000 | 2.087899000  |
| 1 | 4.523643000  | -0.029731000 | 1.300059000  |
| 1 | 4.279569000  | -0.138277000 | 3.047432000  |
| 1 | 4.407360000  | -1.607419000 | 2.090081000  |
| 6 | 1.804902000  | -1.352623000 | 3.001891000  |
| 1 | 0.720925000  | -1.296698000 | 2.883630000  |
| 1 | 2.103541000  | -2.404970000 | 2.995748000  |
| 1 | 2.071143000  | -0.942861000 | 3.978911000  |
| 6 | 3.931311000  | 2.511860000  | 0.159086000  |
| 1 | 4.987680000  | 2.468113000  | -0.115820000 |
| 1 | 3.614548000  | 3.553090000  | 0.061076000  |
| 1 | 3.839494000  | 2.226430000  | 1.208929000  |
| 6 | 3.212633000  | 1.988142000  | -2.194055000 |
| 1 | 2.668892000  | 1.279357000  | -2.824279000 |
| 1 | 2.791662000  | 2.983129000  | -2.362500000 |
| 1 | 4.253947000  | 2.011320000  | -2.523069000 |
| 6 | 0.660261000  | -1.187151000 | -3.091997000 |
| 1 | 0.795432000  | -2.272635000 | -3.201266000 |
| 1 | -0.119588000 | -0.889954000 | -3.800191000 |
| 1 | 1.586370000  | -0.722338000 | -3.443172000 |
| 6 | 2.429733000  | -2.405208000 | 0.194289000  |
| 6 | 2.505864000  | -0.566627000 | 1.911239000  |
| 1 | 3.016869000  | -2.775397000 | 1.039907000  |
| 1 | 2.170937000  | 0.473693000  | 1.991023000  |
| 6 | 3.127603000  | 1.583706000  | -0.733173000 |
| 1 | 3.567928000  | 0.584981000  | -0.643628000 |
| 6 | 0.921241000  | 2.682765000  | -0.249183000 |
| 1 | 1.626726000  | 3.480570000  | -0.501360000 |
| 6 | 0.403407000  | 2.961558000  | 1.148083000  |
| 1 | 1.233140000  | 3.063544000  | 1.851988000  |
| 1 | -0.170307000 | 3.892228000  | 1.161454000  |
| 1 | -0.239125000 | 2.149939000  | 1.499595000  |
| 6 | -0.178739000 | 2.738389000  | -1.295605000 |
| 1 | 0.208841000  | 2.528171000  | -2.294708000 |
| 1 | -0.969529000 | 2.020760000  | -1.072615000 |
| 1 | -0.619852000 | 3.738464000  | -1.303276000 |
| 5 | -1.520813000 | -0.651891000 | 1.365971000  |
| 1 | -1.042016000 | -1.725879000 | 1.732741000  |
| 7 | -1.624930000 | 0.261870000  | 2.561189000  |

|   |              |              |             |
|---|--------------|--------------|-------------|
| 1 | -2.158771000 | 1.116121000  | 2.469256000 |
| 1 | -1.881875000 | -0.188546000 | 3.426422000 |

**5P<sup>N-H</sup>** (TE= -1388.940330)

|    |              |              |              |
|----|--------------|--------------|--------------|
| 6  | -1.495673000 | -0.186804000 | 0.859543000  |
| 6  | -3.424766000 | -0.180962000 | -0.457950000 |
| 7  | -0.972278000 | -0.211169000 | -0.433286000 |
| 7  | -2.815392000 | -0.316076000 | 0.899146000  |
| 6  | -3.546952000 | -0.062517000 | 2.115217000  |
| 1  | -4.529442000 | -0.532800000 | 2.060703000  |
| 1  | -3.016672000 | -0.490690000 | 2.966011000  |
| 1  | -3.687609000 | 1.009884000  | 2.298981000  |
| 15 | 0.511720000  | -0.031061000 | 0.269853000  |
| 6  | -0.421590000 | -0.015468000 | 1.733603000  |
| 7  | 1.549373000  | -1.272055000 | -0.064273000 |
| 7  | 1.363347000  | 1.331902000  | -0.110120000 |
| 6  | -0.385391000 | 3.056583000  | 0.501965000  |
| 1  | -0.829214000 | 2.927080000  | -0.487376000 |
| 1  | -0.970375000 | 2.473101000  | 1.217111000  |
| 1  | -0.467243000 | 4.110317000  | 0.777856000  |
| 6  | 1.699370000  | 2.752814000  | 1.884594000  |
| 1  | 2.765696000  | 2.518813000  | 1.846251000  |
| 1  | 1.583871000  | 3.765519000  | 2.277830000  |
| 1  | 1.222476000  | 2.067623000  | 2.587116000  |
| 6  | 3.488960000  | 1.986708000  | -1.209781000 |
| 1  | 4.039970000  | 1.502301000  | -0.400418000 |
| 1  | 4.064111000  | 1.868243000  | -2.130802000 |
| 1  | 3.441518000  | 3.057337000  | -0.995489000 |
| 6  | 1.318255000  | 2.038182000  | -2.490634000 |
| 1  | 0.352004000  | 1.542383000  | -2.622012000 |
| 1  | 1.136708000  | 3.096108000  | -2.280919000 |
| 1  | 1.865251000  | 1.980977000  | -3.434317000 |
| 6  | 4.010994000  | -1.569039000 | -0.128142000 |
| 1  | 4.918913000  | -1.477696000 | 0.471888000  |
| 1  | 3.998390000  | -2.579334000 | -0.544519000 |
| 1  | 4.077982000  | -0.861842000 | -0.956807000 |
| 6  | 2.704186000  | -2.271552000 | 1.898854000  |
| 1  | 1.832397000  | -2.058399000 | 2.521619000  |
| 1  | 2.632867000  | -3.306870000 | 1.555371000  |
| 1  | 3.598861000  | -2.193713000 | 2.520349000  |
| 6  | -0.257107000 | 0.048935000  | 3.207862000  |
| 1  | -0.721628000 | 0.934865000  | 3.660386000  |
| 1  | -0.665879000 | -0.828264000 | 3.720650000  |
| 1  | 0.803320000  | 0.086112000  | 3.471044000  |
| 6  | 1.077604000  | 2.647013000  | 0.507060000  |
| 6  | 2.113700000  | 1.371430000  | -1.384864000 |

|   |              |              |              |
|---|--------------|--------------|--------------|
| 1 | 1.597550000  | 3.365624000  | -0.132462000 |
| 1 | 2.258105000  | 0.326347000  | -1.670581000 |
| 6 | 2.790996000  | -1.301938000 | 0.733787000  |
| 1 | 2.900582000  | -0.292505000 | 1.152524000  |
| 6 | 1.138911000  | -2.529647000 | -0.724081000 |
| 1 | 2.004815000  | -3.189885000 | -0.610585000 |
| 6 | 0.934438000  | -2.311657000 | -2.210128000 |
| 1 | 1.850980000  | -1.938420000 | -2.673990000 |
| 1 | 0.659399000  | -3.249012000 | -2.698953000 |
| 1 | 0.128825000  | -1.597704000 | -2.395745000 |
| 6 | -0.037927000 | -3.232086000 | -0.067677000 |
| 1 | 0.118347000  | -3.342460000 | 1.007252000  |
| 1 | -0.971994000 | -2.693207000 | -0.233467000 |
| 1 | -0.150538000 | -4.229508000 | -0.498950000 |
| 5 | -2.161842000 | -0.480873000 | -1.501578000 |
| 6 | -4.534260000 | -1.193663000 | -0.638027000 |
| 1 | -5.407447000 | -0.995381000 | -0.003423000 |
| 1 | -4.873365000 | -1.166824000 | -1.677642000 |
| 1 | -4.173547000 | -2.204981000 | -0.434388000 |
| 6 | -3.975415000 | 1.229033000  | -0.597595000 |
| 1 | -4.361972000 | 1.374613000  | -1.608389000 |
| 1 | -4.794376000 | 1.428282000  | 0.103693000  |
| 1 | -3.194330000 | 1.978317000  | -0.424685000 |
| 1 | -2.133571000 | -1.662639000 | -1.817889000 |
| 7 | -2.171400000 | 0.364610000  | -2.735913000 |
| 1 | -2.051937000 | 1.362247000  | -2.618444000 |
| 1 | -1.583944000 | 0.053639000  | -3.494805000 |

**6P<sup>N-H</sup>** (TE= -1557.321446)

|    |              |              |              |
|----|--------------|--------------|--------------|
| 6  | -0.672258000 | -0.822215000 | -0.941994000 |
| 7  | -0.426924000 | -0.175103000 | 0.273734000  |
| 7  | -1.861031000 | -1.414092000 | -0.949415000 |
| 6  | -2.301564000 | -2.419661000 | -1.874660000 |
| 1  | -3.308873000 | -2.195752000 | -2.235163000 |
| 1  | -1.621840000 | -2.443878000 | -2.726869000 |
| 1  | -2.312243000 | -3.400531000 | -1.391567000 |
| 15 | 1.134102000  | -0.007332000 | -0.280936000 |
| 6  | 0.475392000  | -0.721236000 | -1.720389000 |
| 7  | 1.617739000  | 1.567160000  | -0.190494000 |
| 7  | 2.304190000  | -0.864786000 | 0.498913000  |
| 6  | 1.670623000  | -3.245054000 | -0.071439000 |
| 1  | 0.992482000  | -3.227556000 | 0.784482000  |
| 1  | 1.073654000  | -3.084966000 | -0.971210000 |
| 1  | 2.120758000  | -4.238425000 | -0.136638000 |
| 6  | 3.650215000  | -2.107155000 | -1.153620000 |
| 1  | 4.509083000  | -1.459477000 | -0.963095000 |



|   |              |              |              |
|---|--------------|--------------|--------------|
| 1 | 4.022125000  | -3.094390000 | -1.437023000 |
| 1 | 3.101388000  | -1.702595000 | -2.007035000 |
| 6 | 4.191944000  | -0.315947000 | 2.014166000  |
| 1 | 4.624577000  | 0.319260000  | 1.238837000  |
| 1 | 4.432299000  | 0.122325000  | 2.985203000  |
| 1 | 4.685474000  | -1.290187000 | 1.969541000  |
| 6 | 2.082293000  | -1.328598000 | 2.930761000  |
| 1 | 0.997953000  | -1.393129000 | 2.817456000  |
| 1 | 2.488980000  | -2.342783000 | 2.888742000  |
| 1 | 2.308107000  | -0.927583000 | 3.921239000  |
| 6 | 3.709344000  | 2.841719000  | 0.204670000  |
| 1 | 4.743166000  | 2.941216000  | -0.133267000 |
| 1 | 3.272580000  | 3.843199000  | 0.207225000  |
| 1 | 3.720768000  | 2.473211000  | 1.232293000  |
| 6 | 2.902107000  | 2.409575000  | -2.138715000 |
| 1 | 2.398616000  | 1.691556000  | -2.791194000 |
| 1 | 2.364642000  | 3.359402000  | -2.202904000 |
| 1 | 3.910733000  | 2.575194000  | -2.523330000 |
| 6 | 0.817949000  | -1.095347000 | -3.113783000 |
| 1 | 1.079241000  | -2.154931000 | -3.239162000 |
| 1 | -0.009324000 | -0.885332000 | -3.797972000 |
| 1 | 1.671552000  | -0.517233000 | -3.478061000 |
| 6 | 2.767218000  | -2.203864000 | 0.074362000  |
| 6 | 2.686735000  | -0.436662000 | 1.863578000  |
| 1 | 3.402916000  | -2.542549000 | 0.897355000  |
| 1 | 2.259081000  | 0.563982000  | 1.989403000  |
| 6 | 2.958404000  | 1.894349000  | -0.712241000 |
| 1 | 3.510372000  | 0.947663000  | -0.725263000 |
| 6 | 0.675532000  | 2.699365000  | -0.022126000 |
| 1 | 1.273964000  | 3.584423000  | -0.257990000 |
| 6 | 0.237418000  | 2.821496000  | 1.423161000  |
| 1 | 1.101293000  | 2.945788000  | 2.080627000  |
| 1 | -0.416259000 | 3.687510000  | 1.550536000  |
| 1 | -0.313215000 | 1.931415000  | 1.738475000  |
| 6 | -0.501108000 | 2.706635000  | -0.982330000 |
| 1 | -0.176044000 | 2.550313000  | -2.013097000 |
| 1 | -1.232582000 | 1.938320000  | -0.726092000 |
| 1 | -1.001937000 | 3.675780000  | -0.927663000 |
| 5 | -1.374233000 | -0.965314000 | 1.352832000  |
| 7 | -2.526952000 | -1.280648000 | 0.285028000  |
| 6 | -3.647167000 | -0.439378000 | 0.196821000  |
| 6 | -4.555186000 | -0.434585000 | 1.261060000  |
| 6 | -3.917575000 | 0.375580000  | -0.903629000 |
| 6 | -5.672257000 | 0.374152000  | 1.229805000  |
| 1 | -4.354046000 | -1.075685000 | 2.109817000  |
| 6 | -5.051367000 | 1.173132000  | -0.931121000 |

|   |              |              |              |
|---|--------------|--------------|--------------|
| 1 | -3.230945000 | 0.389587000  | -1.742636000 |
| 6 | -5.934217000 | 1.185536000  | 0.132956000  |
| 1 | -6.359262000 | 0.361376000  | 2.069208000  |
| 1 | -5.238501000 | 1.796430000  | -1.799164000 |
| 1 | -6.819538000 | 1.809835000  | 0.108178000  |
| 1 | -0.810085000 | -2.000878000 | 1.664358000  |
| 7 | -1.823020000 | -0.198248000 | 2.524154000  |
| 1 | -1.256586000 | -0.245056000 | 3.354415000  |
| 1 | -2.167762000 | 0.740667000  | 2.383700000  |

**7P<sup>N-H</sup>** (TE= -655.474823)

|   |              |              |              |
|---|--------------|--------------|--------------|
| 6 | -1.457003000 | -1.619211000 | -0.084594000 |
| 6 | -0.118853000 | -1.623023000 | -0.101500000 |
| 1 | -2.154541000 | -2.437411000 | -0.181523000 |
| 1 | 0.476529000  | -2.520948000 | -0.203488000 |
| 6 | -3.190666000 | 0.172676000  | -0.541941000 |
| 6 | -3.209951000 | 0.014175000  | 0.723395000  |
| 7 | -1.916110000 | -0.266379000 | 0.075133000  |
| 7 | 0.463972000  | -0.396704000 | 0.046940000  |
| 5 | -0.620658000 | 0.724859000  | 0.226134000  |
| 6 | 1.831228000  | -0.196193000 | 0.053377000  |
| 6 | 2.746406000  | -1.160700000 | -0.385793000 |
| 6 | 2.343471000  | 1.024945000  | 0.509452000  |
| 6 | 4.106296000  | -0.914436000 | -0.353576000 |
| 1 | 2.395486000  | -2.109053000 | -0.774717000 |
| 6 | 3.704109000  | 1.260491000  | 0.532229000  |
| 1 | 1.654947000  | 1.784949000  | 0.857582000  |
| 6 | 4.602573000  | 0.295421000  | 0.103935000  |
| 1 | 4.788182000  | -1.682524000 | -0.702475000 |
| 1 | 4.067765000  | 2.215283000  | 0.896568000  |
| 1 | 5.669029000  | 0.484038000  | 0.122804000  |
| 6 | -3.644267000 | -0.021971000 | 2.111407000  |
| 1 | -3.028362000 | 0.654443000  | 2.709209000  |
| 1 | -4.688828000 | 0.271410000  | 2.203131000  |
| 1 | -3.520844000 | -1.028539000 | 2.518654000  |
| 6 | -3.612935000 | 0.427958000  | -1.910848000 |
| 1 | -4.679963000 | 0.642739000  | -1.955312000 |
| 1 | -3.052908000 | 1.273010000  | -2.314690000 |
| 1 | -3.402542000 | -0.445529000 | -2.533496000 |
| 1 | -0.658732000 | 1.187842000  | 1.352975000  |
| 7 | -0.659192000 | 1.783236000  | -0.815596000 |
| 1 | -0.397587000 | 2.709763000  | -0.519490000 |
| 1 | -0.187491000 | 1.574377000  | -1.684998000 |

**9P<sup>N-H</sup>** (TE= -1425.743700)

|   |              |             |             |
|---|--------------|-------------|-------------|
| 6 | -1.205477000 | 0.098223000 | 1.256336000 |
|---|--------------|-------------|-------------|

|    |              |              |              |
|----|--------------|--------------|--------------|
| 7  | -0.832375000 | -0.202809000 | -0.109161000 |
| 15 | 0.732117000  | 0.025625000  | 0.363715000  |
| 6  | 0.042146000  | 0.226032000  | 1.914895000  |
| 7  | 1.696234000  | -1.280016000 | -0.010537000 |
| 7  | 1.561945000  | 1.292690000  | -0.320241000 |
| 6  | 0.030649000  | 3.157337000  | 0.434157000  |
| 1  | -0.605666000 | 2.955504000  | -0.430723000 |
| 1  | -0.422864000 | 2.670465000  | 1.299792000  |
| 1  | 0.040814000  | 4.235639000  | 0.612422000  |
| 6  | 2.334545000  | 2.867603000  | 1.414062000  |
| 1  | 3.369175000  | 2.598555000  | 1.188242000  |
| 1  | 2.314109000  | 3.910248000  | 1.740863000  |
| 1  | 1.995121000  | 2.249925000  | 2.247834000  |
| 6  | 3.466913000  | 1.712227000  | -1.854538000 |
| 1  | 4.141815000  | 1.281044000  | -1.111440000 |
| 1  | 3.854251000  | 1.469679000  | -2.846906000 |
| 1  | 3.500764000  | 2.800069000  | -1.752386000 |
| 6  | 1.100527000  | 1.762553000  | -2.716379000 |
| 1  | 0.108757000  | 1.311359000  | -2.626957000 |
| 1  | 0.996781000  | 2.843627000  | -2.584988000 |
| 1  | 1.467906000  | 1.589130000  | -3.730669000 |
| 6  | 4.113475000  | -1.678410000 | -0.393406000 |
| 1  | 5.102488000  | -1.562224000 | 0.055724000  |
| 1  | 4.010255000  | -2.727249000 | -0.683786000 |
| 1  | 4.076417000  | -1.071360000 | -1.299994000 |
| 6  | 3.108440000  | -2.077226000 | 1.875304000  |
| 1  | 2.341360000  | -1.754507000 | 2.582782000  |
| 1  | 2.965541000  | -3.143779000 | 1.681404000  |
| 1  | 4.086545000  | -1.958903000 | 2.347143000  |
| 6  | 0.387207000  | 0.519736000  | 3.323994000  |
| 1  | 0.112170000  | 1.537730000  | 3.639928000  |
| 1  | -0.104490000 | -0.168341000 | 4.021176000  |
| 1  | 1.462653000  | 0.419495000  | 3.497970000  |
| 6  | 1.451073000  | 2.672408000  | 0.197605000  |
| 6  | 2.059983000  | 1.163103000  | -1.704617000 |
| 1  | 1.861142000  | 3.300950000  | -0.598500000 |
| 1  | 2.108514000  | 0.088010000  | -1.896564000 |
| 6  | 3.039206000  | -1.261890000 | 0.594903000  |
| 1  | 3.232247000  | -0.214639000 | 0.862939000  |
| 6  | 1.175743000  | -2.594259000 | -0.431377000 |
| 1  | 2.024371000  | -3.276909000 | -0.317347000 |
| 6  | 0.812230000  | -2.576390000 | -1.903003000 |
| 1  | 1.688278000  | -2.338749000 | -2.512094000 |
| 1  | 0.437119000  | -3.554170000 | -2.217715000 |
| 1  | 0.037962000  | -1.832887000 | -2.112951000 |
| 6  | 0.059298000  | -3.157372000 | 0.435391000  |

|   |              |              |              |
|---|--------------|--------------|--------------|
| 1 | 0.332834000  | -3.142027000 | 1.492178000  |
| 1 | -0.865524000 | -2.588485000 | 0.316833000  |
| 1 | -0.132645000 | -4.194151000 | 0.147635000  |
| 5 | -1.977252000 | 0.158970000  | -1.072950000 |
| 6 | -2.546634000 | 0.222820000  | 1.397248000  |
| 1 | -3.145503000 | 0.464983000  | 2.262682000  |
| 6 | -4.417192000 | -0.699008000 | -0.050073000 |
| 6 | -4.516311000 | 0.573751000  | -0.130533000 |
| 7 | -3.161180000 | 0.077513000  | 0.091525000  |
| 6 | -4.751732000 | -2.108805000 | 0.089875000  |
| 1 | -5.827444000 | -2.261707000 | 0.173600000  |
| 1 | -4.379733000 | -2.685421000 | -0.760463000 |
| 1 | -4.267979000 | -2.499431000 | 0.989940000  |
| 6 | -5.084124000 | 1.912910000  | -0.217728000 |
| 1 | -4.694939000 | 2.432600000  | -1.096686000 |
| 1 | -6.171425000 | 1.883586000  | -0.273149000 |
| 1 | -4.787899000 | 2.493158000  | 0.660330000  |
| 1 | -1.998878000 | 1.326628000  | -1.447901000 |
| 7 | -2.158208000 | -0.774029000 | -2.207257000 |
| 1 | -2.243252000 | -1.758719000 | -1.994174000 |
| 1 | -2.821348000 | -0.513433000 | -2.919982000 |

**II-P<sup>N-H</sup>** (TE= -655.652774)

|   |              |              |              |
|---|--------------|--------------|--------------|
| 6 | -0.664109000 | 1.346511000  | -0.321000000 |
| 6 | -2.138854000 | 0.987363000  | -0.594809000 |
| 6 | -2.390305000 | -0.383481000 | 0.023085000  |
| 6 | -0.999681000 | -1.017466000 | -0.151367000 |
| 7 | -0.108113000 | 0.069275000  | 0.206275000  |
| 1 | -2.303716000 | 0.929854000  | -1.676012000 |
| 1 | -2.821904000 | 1.749236000  | -0.207938000 |
| 6 | 1.284645000  | -0.140472000 | 0.131711000  |
| 6 | 1.859129000  | -1.014506000 | -0.789052000 |
| 6 | 3.231484000  | -1.177656000 | -0.847859000 |
| 6 | 4.063110000  | -0.468101000 | 0.003171000  |
| 6 | 3.502021000  | 0.394977000  | 0.929579000  |
| 6 | 2.128520000  | 0.546575000  | 1.001851000  |
| 1 | 1.224772000  | -1.576000000 | -1.464320000 |
| 1 | 3.655613000  | -1.865293000 | -1.571200000 |
| 1 | 5.137833000  | -0.597351000 | -0.046369000 |
| 1 | 4.136685000  | 0.942021000  | 1.617786000  |
| 1 | 1.690188000  | 1.186429000  | 1.758525000  |
| 6 | -3.455362000 | -1.160719000 | -0.723710000 |
| 1 | -3.575461000 | -2.166279000 | -0.308055000 |
| 1 | -4.424826000 | -0.660167000 | -0.650363000 |
| 1 | -3.206539000 | -1.258236000 | -1.784243000 |
| 6 | -2.779897000 | -0.271500000 | 1.489175000  |

|   |              |              |              |
|---|--------------|--------------|--------------|
| 1 | -3.688493000 | 0.328524000  | 1.587546000  |
| 1 | -2.990078000 | -1.253853000 | 1.921187000  |
| 1 | -1.996354000 | 0.199970000  | 2.085786000  |
| 6 | 0.016129000  | 1.763170000  | -1.618454000 |
| 1 | 1.057977000  | 2.049450000  | -1.455509000 |
| 1 | -0.003581000 | 0.949777000  | -2.349321000 |
| 1 | -0.507127000 | 2.619601000  | -2.051836000 |
| 6 | -0.547914000 | 2.475409000  | 0.690084000  |
| 1 | -1.060909000 | 3.363402000  | 0.310630000  |
| 1 | -1.000620000 | 2.199947000  | 1.645036000  |
| 1 | 0.493755000  | 2.749559000  | 0.866399000  |
| 1 | -0.913172000 | -1.299511000 | -1.221912000 |
| 7 | -0.677640000 | -2.194008000 | 0.610449000  |
| 1 | -0.797677000 | -2.022150000 | 1.602035000  |
| 1 | -1.259592000 | -2.976434000 | 0.340639000  |

Cartesian coordinates of the C–H splitting product obtained from **4-7**, **9** and **II**, along with their total energies (in hartrees) including zero point vibrational correction.

**4P<sup>C-H</sup>** (TE= -1754.021281)

|    |              |              |              |
|----|--------------|--------------|--------------|
| 6  | 0.822297000  | -0.633822000 | 0.959111000  |
| 6  | 2.802892000  | -0.768008000 | -0.226711000 |
| 7  | 0.433026000  | -0.286816000 | -0.339182000 |
| 7  | 2.122359000  | -0.851678000 | 1.062856000  |
| 6  | 2.722964000  | -1.408558000 | 2.244690000  |
| 1  | 3.445937000  | -0.721617000 | 2.695698000  |
| 1  | 1.954896000  | -1.628500000 | 2.987254000  |
| 1  | 3.249800000  | -2.331710000 | 1.985726000  |
| 15 | 4.110795000  | 0.291028000  | -0.423793000 |
| 6  | 5.461909000  | 0.086099000  | 0.769218000  |
| 1  | 6.343570000  | 0.631542000  | 0.426440000  |
| 1  | 5.169543000  | 0.485922000  | 1.741495000  |
| 1  | 5.704356000  | -0.971495000 | 0.874639000  |
| 6  | 3.967043000  | 2.127963000  | -0.462927000 |
| 1  | 4.921954000  | 2.610542000  | -0.687275000 |
| 1  | 3.234477000  | 2.403041000  | -1.225222000 |
| 1  | 3.608147000  | 2.482745000  | 0.505372000  |
| 6  | 4.822980000  | -0.064837000 | -2.039191000 |
| 1  | 5.647459000  | 0.618278000  | -2.251812000 |
| 1  | 5.174730000  | -1.095711000 | -2.060712000 |
| 1  | 4.043182000  | 0.055573000  | -2.792850000 |
| 15 | -1.092281000 | -0.105980000 | 0.272857000  |
| 6  | -0.346332000 | -0.650541000 | 1.739669000  |
| 7  | -1.610903000 | 1.466077000  | 0.133349000  |
| 7  | -2.341082000 | -0.987246000 | -0.349790000 |
| 6  | -1.420921000 | -3.313898000 | -0.055029000 |

|   |              |              |              |
|---|--------------|--------------|--------------|
| 1 | -0.989854000 | -3.274980000 | -1.056471000 |
| 1 | -0.638246000 | -3.053119000 | 0.660584000  |
| 1 | -1.738237000 | -4.340302000 | 0.144507000  |
| 6 | -3.244990000 | -2.435326000 | 1.443075000  |
| 1 | -4.118316000 | -1.780503000 | 1.494253000  |
| 1 | -3.567069000 | -3.453781000 | 1.672067000  |
| 1 | -2.535056000 | -2.129399000 | 2.213506000  |
| 6 | -4.503249000 | -0.642044000 | -1.523179000 |
| 1 | -4.885431000 | -0.158398000 | -0.621217000 |
| 1 | -4.946234000 | -0.143528000 | -2.388396000 |
| 1 | -4.857851000 | -1.675498000 | -1.532251000 |
| 6 | -2.429847000 | -1.262536000 | -2.814513000 |
| 1 | -1.354336000 | -1.087230000 | -2.897092000 |
| 1 | -2.596093000 | -2.342314000 | -2.762645000 |
| 1 | -2.909409000 | -0.896880000 | -3.725376000 |
| 6 | -3.803078000 | 2.624422000  | 0.005588000  |
| 1 | -4.745516000 | 2.770707000  | 0.538027000  |
| 1 | -3.405122000 | 3.615774000  | -0.225144000 |
| 1 | -4.020953000 | 2.119775000  | -0.937089000 |
| 6 | -2.558462000 | 2.525331000  | 2.178893000  |
| 1 | -1.878906000 | 1.940364000  | 2.802095000  |
| 1 | -2.111238000 | 3.509803000  | 2.018199000  |
| 1 | -3.488080000 | 2.675756000  | 2.732234000  |
| 6 | -0.603365000 | -0.602662000 | 3.202888000  |
| 1 | -0.463292000 | -1.568416000 | 3.703501000  |
| 1 | 0.030646000  | 0.125552000  | 3.725587000  |
| 1 | -1.638846000 | -0.309401000 | 3.398142000  |
| 6 | -2.611035000 | -2.382856000 | 0.067358000  |
| 6 | -2.990804000 | -0.546414000 | -1.602646000 |
| 1 | -3.361163000 | -2.739912000 | -0.643928000 |
| 1 | -2.736727000 | 0.511364000  | -1.704865000 |
| 6 | -2.842382000 | 1.819864000  | 0.863796000  |
| 1 | -3.333015000 | 0.866836000  | 1.100793000  |
| 6 | -0.732280000 | 2.582769000  | -0.267646000 |
| 1 | -1.331412000 | 3.480892000  | -0.085800000 |
| 6 | -0.436180000 | 2.536668000  | -1.753440000 |
| 1 | -1.363443000 | 2.559411000  | -2.331746000 |
| 1 | 0.168175000  | 3.399236000  | -2.046411000 |
| 1 | 0.122027000  | 1.634429000  | -2.016782000 |
| 6 | 0.531223000  | 2.724041000  | 0.565022000  |
| 1 | 0.309869000  | 2.704257000  | 1.634523000  |
| 1 | 1.237462000  | 1.922759000  | 0.342042000  |
| 1 | 1.017414000  | 3.675693000  | 0.334470000  |
| 5 | 1.615556000  | -0.686576000 | -1.367463000 |
| 1 | 1.770323000  | 0.215249000  | -2.190463000 |
| 6 | 1.363515000  | -2.106992000 | -2.092525000 |

|   |             |              |              |
|---|-------------|--------------|--------------|
| 1 | 1.270017000 | -2.917977000 | -1.358704000 |
| 1 | 0.479421000 | -2.147060000 | -2.741789000 |
| 1 | 2.228404000 | -2.354538000 | -2.720001000 |

**5P<sup>C-H</sup>** (TE= -1372.860331)

|    |              |              |              |
|----|--------------|--------------|--------------|
| 6  | -1.499460000 | -0.203503000 | 0.859546000  |
| 6  | -3.429111000 | -0.158923000 | -0.457832000 |
| 7  | -0.979984000 | -0.190256000 | -0.437101000 |
| 7  | -2.817618000 | -0.342066000 | 0.897051000  |
| 6  | -3.547764000 | -0.136549000 | 2.123217000  |
| 1  | -4.533373000 | -0.597108000 | 2.047407000  |
| 1  | -3.021415000 | -0.606082000 | 2.954524000  |
| 1  | -3.680781000 | 0.927558000  | 2.354312000  |
| 15 | 0.507924000  | -0.034326000 | 0.263269000  |
| 6  | -0.422370000 | -0.049160000 | 1.730608000  |
| 7  | 1.535853000  | -1.276040000 | -0.095923000 |
| 7  | 1.371123000  | 1.330290000  | -0.077710000 |
| 6  | -0.390043000 | 3.047822000  | 0.515415000  |
| 1  | -0.809127000 | 2.931658000  | -0.486364000 |
| 1  | -0.992777000 | 2.455980000  | 1.208806000  |
| 1  | -0.477714000 | 4.097711000  | 0.803965000  |
| 6  | 1.656366000  | 2.721249000  | 1.948713000  |
| 1  | 2.720771000  | 2.475667000  | 1.938100000  |
| 1  | 1.541263000  | 3.731724000  | 2.347776000  |
| 1  | 1.151662000  | 2.035644000  | 2.630915000  |
| 6  | 3.540163000  | 1.987865000  | -1.087212000 |
| 1  | 4.062196000  | 1.474038000  | -0.276927000 |
| 1  | 4.142623000  | 1.892415000  | -1.993328000 |
| 1  | 3.494677000  | 3.051795000  | -0.841305000 |
| 6  | 1.416779000  | 2.094159000  | -2.439936000 |
| 1  | 0.450647000  | 1.615617000  | -2.617960000 |
| 1  | 1.239070000  | 3.148735000  | -2.211408000 |
| 1  | 1.995922000  | 2.052987000  | -3.365014000 |
| 6  | 3.995948000  | -1.597742000 | -0.142600000 |
| 1  | 4.898213000  | -1.526201000 | 0.468543000  |
| 1  | 3.979700000  | -2.599185000 | -0.579533000 |
| 1  | 4.077841000  | -0.874644000 | -0.955927000 |
| 6  | 2.662805000  | -2.336478000 | 1.852563000  |
| 1  | 1.787426000  | -2.131340000 | 2.472808000  |
| 1  | 2.585467000  | -3.361906000 | 1.481988000  |
| 1  | 3.552447000  | -2.282484000 | 2.483748000  |
| 6  | -0.248249000 | -0.043509000 | 3.205168000  |
| 1  | -0.737615000 | 0.806681000  | 3.697253000  |
| 1  | -0.624159000 | -0.954647000 | 3.683345000  |
| 1  | 0.812288000  | 0.018467000  | 3.462811000  |
| 6  | 1.071814000  | 2.636640000  | 0.553578000  |

|   |              |              |              |
|---|--------------|--------------|--------------|
| 6 | 2.165869000  | 1.391561000  | -1.324710000 |
| 1 | 1.609515000  | 3.363628000  | -0.061174000 |
| 1 | 2.308509000  | 0.352340000  | -1.630954000 |
| 6 | 2.769707000  | -1.338714000 | 0.713141000  |
| 1 | 2.885433000  | -0.341364000 | 1.158458000  |
| 6 | 1.120076000  | -2.513197000 | -0.790511000 |
| 1 | 1.984034000  | -3.178916000 | -0.696087000 |
| 6 | 0.915880000  | -2.252536000 | -2.269462000 |
| 1 | 1.833335000  | -1.867491000 | -2.721819000 |
| 1 | 0.640322000  | -3.175432000 | -2.784772000 |
| 1 | 0.111362000  | -1.533167000 | -2.436946000 |
| 6 | -0.058440000 | -3.229415000 | -0.152218000 |
| 1 | 0.097319000  | -3.368569000 | 0.919511000  |
| 1 | -0.991633000 | -2.685111000 | -0.304850000 |
| 1 | -0.173204000 | -4.215083000 | -0.609332000 |
| 5 | -2.150465000 | -0.437581000 | -1.487865000 |
| 6 | -4.542349000 | -1.162553000 | -0.666998000 |
| 1 | -5.416288000 | -0.978687000 | -0.029085000 |
| 1 | -4.882529000 | -1.107753000 | -1.705502000 |
| 1 | -4.185343000 | -2.180214000 | -0.492407000 |
| 6 | -3.981608000 | 1.255591000  | -0.537805000 |
| 1 | -4.396059000 | 1.442291000  | -1.531354000 |
| 1 | -4.785787000 | 1.429847000  | 0.187352000  |
| 1 | -3.196818000 | 1.998363000  | -0.360745000 |
| 1 | -2.156031000 | -1.622130000 | -1.812485000 |
| 6 | -2.082036000 | 0.506704000  | -2.786374000 |
| 1 | -1.997982000 | 1.574910000  | -2.548537000 |
| 1 | -1.236897000 | 0.256065000  | -3.438241000 |
| 1 | -2.982502000 | 0.386831000  | -3.401232000 |

**6P<sup>C-H</sup>** (TE= -1541.239119)

|    |              |              |              |
|----|--------------|--------------|--------------|
| 6  | 0.637698000  | -0.829037000 | 0.936596000  |
| 7  | 0.330754000  | -0.436491000 | -0.365193000 |
| 7  | 1.890850000  | -1.277830000 | 1.041911000  |
| 6  | 2.307940000  | -2.269088000 | 2.000533000  |
| 1  | 3.347347000  | -2.103250000 | 2.288788000  |
| 1  | 1.680478000  | -2.193660000 | 2.889178000  |
| 1  | 2.216894000  | -3.274230000 | 1.575782000  |
| 15 | -1.148283000 | 0.007949000  | 0.234221000  |
| 6  | -0.487916000 | -0.619216000 | 1.720386000  |
| 7  | -1.364664000 | 1.629440000  | 0.033890000  |
| 7  | -2.514604000 | -0.693634000 | -0.349717000 |
| 6  | -2.075637000 | -3.114742000 | 0.218561000  |
| 1  | -1.576441000 | -3.241994000 | -0.743150000 |
| 1  | -1.308737000 | -2.957052000 | 0.980687000  |
| 1  | -2.604933000 | -4.040412000 | 0.455511000  |



|   |              |              |              |
|---|--------------|--------------|--------------|
| 6 | -3.760350000 | -1.753079000 | 1.504967000  |
| 1 | -4.519895000 | -0.971935000 | 1.428179000  |
| 1 | -4.249684000 | -2.674447000 | 1.828358000  |
| 1 | -3.048995000 | -1.466086000 | 2.281841000  |
| 6 | -4.557212000 | -0.043595000 | -1.609266000 |
| 1 | -4.858660000 | 0.569515000  | -0.757157000 |
| 1 | -4.884550000 | 0.459801000  | -2.521462000 |
| 1 | -5.096624000 | -0.992196000 | -1.555101000 |
| 6 | -2.612437000 | -1.131429000 | -2.787211000 |
| 1 | -1.521879000 | -1.170951000 | -2.845475000 |
| 1 | -2.985382000 | -2.152317000 | -2.664969000 |
| 1 | -2.992966000 | -0.752358000 | -3.738109000 |
| 6 | -3.336422000 | 3.133034000  | -0.098948000 |
| 1 | -4.217624000 | 3.467231000  | 0.452667000  |
| 1 | -2.789048000 | 4.027205000  | -0.406665000 |
| 1 | -3.674202000 | 2.616136000  | -0.998789000 |
| 6 | -2.024554000 | 2.942602000  | 2.034826000  |
| 1 | -1.435080000 | 2.276273000  | 2.668581000  |
| 1 | -1.410648000 | 3.815026000  | 1.796908000  |
| 1 | -2.884407000 | 3.293379000  | 2.609428000  |
| 6 | -0.740310000 | -0.631752000 | 3.182300000  |
| 1 | -0.975136000 | -1.629659000 | 3.573921000  |
| 1 | 0.118011000  | -0.255313000 | 3.748392000  |
| 1 | -1.588214000 | 0.009409000  | 3.438244000  |
| 6 | -3.064707000 | -1.966433000 | 0.175874000  |
| 6 | -3.052888000 | -0.232475000 | -1.649924000 |
| 1 | -3.833191000 | -2.248224000 | -0.548966000 |
| 1 | -2.607118000 | 0.751858000  | -1.816216000 |
| 6 | -2.489502000 | 2.229401000  | 0.778020000  |
| 1 | -3.124066000 | 1.388822000  | 1.090172000  |
| 6 | -0.333937000 | 2.553270000  | -0.494621000 |
| 1 | -0.765129000 | 3.546864000  | -0.338554000 |
| 6 | -0.152909000 | 2.371449000  | -1.988057000 |
| 1 | -1.098470000 | 2.513944000  | -2.517247000 |
| 1 | 0.564415000  | 3.100764000  | -2.370925000 |
| 1 | 0.236591000  | 1.376697000  | -2.218833000 |
| 6 | 0.993594000  | 2.529054000  | 0.244624000  |
| 1 | 0.850583000  | 2.532066000  | 1.327617000  |
| 1 | 1.586504000  | 1.653826000  | -0.024263000 |
| 1 | 1.574015000  | 3.414775000  | -0.023047000 |
| 5 | 1.410751000  | -1.133534000 | -1.321563000 |
| 7 | 2.545729000  | -1.237834000 | -0.211613000 |
| 6 | 3.668340000  | -0.416315000 | -0.225075000 |
| 6 | 4.414893000  | -0.338231000 | -1.407655000 |
| 6 | 4.115914000  | 0.310727000  | 0.881055000  |
| 6 | 5.546559000  | 0.445775000  | -1.478831000 |

|   |             |              |              |
|---|-------------|--------------|--------------|
| 1 | 4.085043000 | -0.910247000 | -2.267469000 |
| 6 | 5.259625000 | 1.088905000  | 0.798581000  |
| 1 | 3.549322000 | 0.285160000  | 1.804288000  |
| 6 | 5.985193000 | 1.168279000  | -0.376117000 |
| 1 | 6.101746000 | 0.489068000  | -2.409777000 |
| 1 | 5.580075000 | 1.647118000  | 1.672048000  |
| 1 | 6.878830000 | 1.777897000  | -0.434646000 |
| 1 | 1.747353000 | -0.384393000 | -2.211859000 |
| 6 | 0.970055000 | -2.595593000 | -1.805921000 |
| 1 | 0.758452000 | -3.254402000 | -0.953206000 |
| 1 | 0.083287000 | -2.601055000 | -2.448887000 |
| 1 | 1.780009000 | -3.064846000 | -2.374454000 |

**7P<sup>C-H</sup>** (TE= -639.391135)

|   |              |              |              |
|---|--------------|--------------|--------------|
| 6 | -1.462912000 | -1.296909000 | -0.904630000 |
| 6 | -0.123724000 | -1.301139000 | -0.935639000 |
| 1 | -2.171001000 | -1.968704000 | -1.365672000 |
| 1 | 0.456426000  | -2.038249000 | -1.474967000 |
| 6 | -3.288535000 | 0.299761000  | -0.183702000 |
| 6 | -3.069826000 | -0.430687000 | 0.839689000  |
| 7 | -1.912406000 | -0.216398000 | -0.062305000 |
| 7 | 0.471359000  | -0.307485000 | -0.217947000 |
| 5 | -0.620589000 | 0.674016000  | 0.336033000  |
| 6 | 1.836322000  | -0.165870000 | -0.069749000 |
| 6 | 2.770818000  | -0.953069000 | -0.754638000 |
| 6 | 2.328661000  | 0.808366000  | 0.808356000  |
| 6 | 4.127081000  | -0.769465000 | -0.563353000 |
| 1 | 2.442298000  | -1.712737000 | -1.453293000 |
| 6 | 3.686693000  | 0.981432000  | 0.990129000  |
| 1 | 1.625337000  | 1.422371000  | 1.357556000  |
| 6 | 4.603451000  | 0.196989000  | 0.308019000  |
| 1 | 4.823697000  | -1.394439000 | -1.111820000 |
| 1 | 4.032542000  | 1.743724000  | 1.679940000  |
| 1 | 5.667968000  | 0.336404000  | 0.451265000  |
| 6 | -3.223497000 | -1.179196000 | 2.075701000  |
| 1 | -2.534734000 | -0.790731000 | 2.830210000  |
| 1 | -4.242594000 | -1.114217000 | 2.453583000  |
| 1 | -2.972360000 | -2.229583000 | 1.907453000  |
| 6 | -3.984711000 | 1.096756000  | -1.185250000 |
| 1 | -5.054859000 | 1.121629000  | -0.984378000 |
| 1 | -3.601185000 | 2.118880000  | -1.201345000 |
| 1 | -3.818719000 | 0.667218000  | -2.176695000 |
| 1 | -0.601858000 | 0.777923000  | 1.548772000  |
| 6 | -0.669709000 | 2.064392000  | -0.457427000 |
| 1 | 0.251288000  | 2.640786000  | -0.335884000 |
| 1 | -0.804252000 | 1.902616000  | -1.535038000 |

1 -1.488390000 2.706048000 -0.113118000

**9P<sup>C-H</sup>** (TE= -1409.660060)

6 1.206844000 -0.130993000 1.259714000  
7 0.840702000 0.179433000 -0.108636000  
15 -0.725729000 -0.024737000 0.367697000  
6 -0.040374000 -0.226370000 1.921240000  
7 -1.668722000 1.288797000 -0.040610000  
7 -1.557837000 -1.288234000 -0.319958000  
6 -0.238709000 -3.227386000 0.605008000  
1 0.436524000 -3.138060000 -0.249079000  
1 0.232443000 -2.723442000 1.450825000  
1 -0.349375000 -4.286636000 0.850954000  
6 -2.536368000 -2.658174000 1.481070000  
1 -3.541522000 -2.341934000 1.191574000  
1 -2.601231000 -3.666222000 1.897839000  
1 -2.184394000 -1.992756000 2.272361000  
6 -3.363988000 -1.582761000 -1.996021000  
1 -4.042419000 -1.001991000 -1.368032000  
1 -3.625925000 -1.397980000 -3.040434000  
1 -3.545903000 -2.642935000 -1.800357000  
6 -0.972517000 -2.009984000 -2.628407000  
1 0.067458000 -1.723665000 -2.456219000  
1 -1.064625000 -3.083658000 -2.441219000  
1 -1.210205000 -1.841438000 -3.681386000  
6 -3.996018000 1.817210000 -0.719507000  
1 -5.041376000 1.654060000 -0.447069000  
1 -3.858234000 2.894302000 -0.844134000  
1 -3.816886000 1.338519000 -1.684443000  
6 -3.329641000 1.897011000 1.704811000  
1 -2.705813000 1.435200000 2.474356000  
1 -3.103531000 2.966737000 1.684943000  
1 -4.375955000 1.787486000 1.999166000  
6 -0.382156000 -0.456433000 3.342674000  
1 -0.269115000 -1.502718000 3.665818000  
1 0.248739000 0.145529000 4.005767000  
1 -1.416803000 -0.173670000 3.560490000  
6 -1.600526000 -2.631926000 0.288399000  
6 -1.913860000 -1.204961000 -1.750242000  
1 -2.048304000 -3.270208000 -0.479715000  
1 -1.795085000 -0.150115000 -2.021889000  
6 -3.087736000 1.245527000 0.353810000  
1 -3.334613000 0.183448000 0.454740000  
6 -1.106173000 2.635126000 -0.277405000  
1 -1.951368000 3.317337000 -0.141965000  
6 -0.644734000 2.772873000 -1.714151000

|   |              |              |              |
|---|--------------|--------------|--------------|
| 1 | -1.465437000 | 2.571134000  | -2.406538000 |
| 1 | -0.275139000 | 3.783544000  | -1.906115000 |
| 1 | 0.163307000  | 2.071192000  | -1.925940000 |
| 6 | -0.041051000 | 3.085588000  | 0.709573000  |
| 1 | -0.373091000 | 2.953087000  | 1.741158000  |
| 1 | 0.891213000  | 2.532349000  | 0.576069000  |
| 1 | 0.164468000  | 4.147007000  | 0.549727000  |
| 5 | 1.998675000  | -0.275695000 | -1.032491000 |
| 6 | 2.546645000  | -0.272150000 | 1.396580000  |
| 1 | 3.151443000  | -0.522308000 | 2.254885000  |
| 6 | 4.378512000  | 0.723891000  | -0.040414000 |
| 6 | 4.545117000  | -0.541624000 | -0.116708000 |
| 7 | 3.162044000  | -0.118897000 | 0.088139000  |
| 6 | 4.612617000  | 2.154928000  | 0.073422000  |
| 1 | 5.672060000  | 2.384843000  | 0.182560000  |
| 1 | 4.224501000  | 2.680160000  | -0.803055000 |
| 1 | 4.074676000  | 2.531050000  | 0.948677000  |
| 6 | 5.182806000  | -1.848757000 | -0.206241000 |
| 1 | 4.828857000  | -2.380862000 | -1.092778000 |
| 1 | 6.267145000  | -1.759735000 | -0.253402000 |
| 1 | 4.911722000  | -2.450912000 | 0.664932000  |
| 1 | 1.959875000  | -1.479056000 | -1.282197000 |
| 6 | 2.292455000  | 0.618668000  | -2.322139000 |
| 1 | 1.505179000  | 0.503751000  | -3.075240000 |
| 1 | 2.359964000  | 1.689362000  | -2.091840000 |
| 1 | 3.229154000  | 0.326235000  | -2.809750000 |

**II-PC<sup>H</sup>** (TE= -639.594566)

|   |              |              |              |
|---|--------------|--------------|--------------|
| 6 | -0.759442000 | 1.353558000  | 0.189102000  |
| 6 | -2.231198000 | 0.909383000  | 0.240675000  |
| 6 | -2.297817000 | -0.501704000 | -0.332439000 |
| 6 | -0.954765000 | -1.076909000 | 0.133924000  |
| 7 | -0.049174000 | 0.064675000  | 0.016371000  |
| 1 | -2.880233000 | 1.607993000  | -0.295308000 |
| 1 | -2.574377000 | 0.892496000  | 1.280205000  |
| 6 | 1.316716000  | -0.113694000 | -0.044323000 |
| 6 | 1.868825000  | -1.402436000 | -0.174185000 |
| 6 | 3.232418000  | -1.601828000 | -0.266965000 |
| 6 | 4.119881000  | -0.540492000 | -0.227948000 |
| 6 | 3.597326000  | 0.733444000  | -0.090595000 |
| 6 | 2.235540000  | 0.949131000  | 0.001964000  |
| 1 | 1.225345000  | -2.270589000 | -0.206383000 |
| 1 | 3.602564000  | -2.616346000 | -0.369248000 |
| 1 | 5.188312000  | -0.702020000 | -0.297705000 |
| 1 | 4.260582000  | 1.590907000  | -0.051030000 |
| 1 | 1.893337000  | 1.965961000  | 0.111478000  |

|   |              |              |              |
|---|--------------|--------------|--------------|
| 6 | -2.335572000 | -0.503429000 | -1.857462000 |
| 1 | -2.480662000 | -1.522086000 | -2.228173000 |
| 1 | -3.162708000 | 0.108890000  | -2.227862000 |
| 1 | -1.408657000 | -0.126356000 | -2.292183000 |
| 6 | -3.512184000 | -1.257985000 | 0.173453000  |
| 1 | -4.423694000 | -0.804877000 | -0.226487000 |
| 1 | -3.491623000 | -2.300982000 | -0.156709000 |
| 1 | -3.587660000 | -1.246599000 | 1.262204000  |
| 6 | -0.548583000 | 2.306862000  | -0.985432000 |
| 1 | 0.494615000  | 2.584268000  | -1.128068000 |
| 1 | -0.907702000 | 1.872823000  | -1.918954000 |
| 1 | -1.113742000 | 3.224901000  | -0.804686000 |
| 6 | -0.409983000 | 2.053403000  | 1.500839000  |
| 1 | -1.125606000 | 2.860740000  | 1.678785000  |
| 1 | -0.473256000 | 1.352844000  | 2.336664000  |
| 1 | 0.586936000  | 2.492784000  | 1.505448000  |
| 1 | -0.652627000 | -1.858111000 | -0.574667000 |
| 6 | -0.952700000 | -1.661400000 | 1.537207000  |
| 1 | 0.067032000  | -1.890535000 | 1.851331000  |
| 1 | -1.369473000 | -0.959307000 | 2.263547000  |
| 1 | -1.533262000 | -2.584936000 | 1.586321000  |

Cartesian coordinates of the C–F splitting product obtained from **4-7**, **9** and **IIIa**, along with their total energies (in hartrees) including zero point vibrational correction.

**4P<sup>C-F</sup>** (TE= -2044.969784)

|    |              |              |              |
|----|--------------|--------------|--------------|
| 6  | -0.410589000 | -1.245041000 | 1.036056000  |
| 6  | -2.537266000 | -0.476513000 | 0.588648000  |
| 7  | -0.204958000 | -0.308174000 | 0.017292000  |
| 7  | -1.686528000 | -1.407913000 | 1.326591000  |
| 6  | -2.131010000 | -2.141732000 | 2.477835000  |
| 1  | -2.778002000 | -2.979676000 | 2.195422000  |
| 1  | -1.276248000 | -2.545155000 | 3.020846000  |
| 1  | -2.699029000 | -1.480093000 | 3.140673000  |
| 15 | -4.015270000 | -1.026605000 | -0.026157000 |
| 6  | -5.257486000 | -1.507882000 | 1.206665000  |
| 1  | -6.206724000 | -1.721624000 | 0.710503000  |
| 1  | -4.941096000 | -2.401543000 | 1.745530000  |
| 1  | -5.390288000 | -0.694152000 | 1.919896000  |
| 6  | -4.074794000 | -2.448596000 | -1.176945000 |
| 1  | -5.091382000 | -2.688895000 | -1.498062000 |
| 1  | -3.455799000 | -2.210068000 | -2.042827000 |
| 1  | -3.645796000 | -3.320019000 | -0.675663000 |
| 6  | -4.772434000 | 0.330028000  | -0.931225000 |
| 1  | -5.759787000 | 0.026327000  | -1.282798000 |
| 1  | -4.863851000 | 1.195264000  | -0.274718000 |

|    |              |              |              |
|----|--------------|--------------|--------------|
| 1  | -4.143559000 | 0.593329000  | -1.781222000 |
| 15 | 1.423251000  | -0.541562000 | 0.259144000  |
| 6  | 0.863116000  | -1.651752000 | 1.461386000  |
| 7  | 2.185872000  | -1.074217000 | -1.108834000 |
| 7  | 2.337387000  | 0.734264000  | 0.766843000  |
| 6  | 1.116061000  | 1.324317000  | 2.894179000  |
| 1  | 0.466433000  | 1.991031000  | 2.323604000  |
| 1  | 0.592518000  | 0.375936000  | 3.036856000  |
| 1  | 1.286901000  | 1.770252000  | 3.876912000  |
| 6  | 3.379911000  | 0.210968000  | 2.951596000  |
| 1  | 4.352176000  | 0.149241000  | 2.457343000  |
| 1  | 3.536250000  | 0.587003000  | 3.965464000  |
| 1  | 2.970540000  | -0.796977000 | 3.031341000  |
| 6  | 4.286271000  | 2.034128000  | -0.051616000 |
| 1  | 4.881286000  | 1.118371000  | -0.064344000 |
| 1  | 4.625410000  | 2.670706000  | -0.872005000 |
| 1  | 4.500966000  | 2.566244000  | 0.878681000  |
| 6  | 1.964864000  | 2.999365000  | -0.179351000 |
| 1  | 0.909545000  | 2.765480000  | -0.334720000 |
| 1  | 2.059385000  | 3.530985000  | 0.771987000  |
| 1  | 2.281910000  | 3.684032000  | -0.969447000 |
| 6  | 4.512411000  | -1.073279000 | -1.975874000 |
| 1  | 5.535630000  | -1.361840000 | -1.725315000 |
| 1  | 4.289095000  | -1.495440000 | -2.958738000 |
| 1  | 4.474992000  | 0.014194000  | -2.057949000 |
| 6  | 3.597353000  | -3.099162000 | -0.809807000 |
| 1  | 2.923421000  | -3.457035000 | -0.028285000 |
| 1  | 3.307407000  | -3.572614000 | -1.751508000 |
| 1  | 4.609736000  | -3.433864000 | -0.572883000 |
| 6  | 1.367436000  | -2.669157000 | 2.415546000  |
| 1  | 1.279436000  | -2.373240000 | 3.470625000  |
| 1  | 0.851221000  | -3.629815000 | 2.308777000  |
| 1  | 2.427996000  | -2.871260000 | 2.240732000  |
| 6  | 2.445588000  | 1.129503000  | 2.190090000  |
| 6  | 2.806513000  | 1.739561000  | -0.213548000 |
| 1  | 2.922859000  | 2.112928000  | 2.162671000  |
| 1  | 2.666622000  | 1.278303000  | -1.195109000 |
| 6  | 3.556585000  | -1.584461000 | -0.913200000 |
| 1  | 3.892254000  | -1.178281000 | 0.050341000  |
| 6  | 1.492579000  | -1.481842000 | -2.349758000 |
| 1  | 2.270591000  | -1.973630000 | -2.942425000 |
| 6  | 1.043156000  | -0.263755000 | -3.131838000 |
| 1  | 1.902637000  | 0.352550000  | -3.407496000 |
| 1  | 0.528045000  | -0.565560000 | -4.046867000 |
| 1  | 0.343493000  | 0.341909000  | -2.553811000 |
| 6  | 0.389725000  | -2.511206000 | -2.158894000 |

|                                            |              |              |              |
|--------------------------------------------|--------------|--------------|--------------|
| 1                                          | 0.742379000  | -3.355691000 | -1.562898000 |
| 1                                          | -0.490265000 | -2.081358000 | -1.680286000 |
| 1                                          | 0.082280000  | -2.890972000 | -3.136428000 |
| 5                                          | -1.577300000 | 0.310711000  | -0.482919000 |
| 6                                          | -1.590019000 | 1.923862000  | -0.441261000 |
| 6                                          | -1.472145000 | 2.704495000  | -1.590974000 |
| 6                                          | -1.693585000 | 2.604484000  | 0.772195000  |
| 6                                          | -1.436544000 | 4.091309000  | -1.534647000 |
| 6                                          | -1.651121000 | 3.986719000  | 0.845926000  |
| 6                                          | -1.518128000 | 4.738826000  | -0.313091000 |
| 9                                          | -1.810440000 | -0.096094000 | -1.845964000 |
| 1                                          | -1.408043000 | 2.209044000  | -2.555606000 |
| 1                                          | -1.822030000 | 2.017187000  | 1.678760000  |
| 1                                          | -1.729289000 | 4.483741000  | 1.807837000  |
| 1                                          | -1.488805000 | 5.821876000  | -0.263381000 |
| 1                                          | -1.343757000 | 4.669846000  | -2.448345000 |
| <b>5P<sup>C-F</sup></b> (TE= -1663.798624) |              |              |              |
| 6                                          | -0.396297000 | -1.552321000 | 0.956222000  |
| 6                                          | -2.549954000 | -1.966381000 | 0.120141000  |
| 7                                          | -0.467682000 | -0.666886000 | -0.122151000 |
| 7                                          | -1.530956000 | -2.196556000 | 1.185833000  |
| 6                                          | -1.636359000 | -3.239166000 | 2.173652000  |
| 1                                          | -1.376776000 | -4.224090000 | 1.770121000  |
| 1                                          | -0.973205000 | -3.022531000 | 3.011852000  |
| 1                                          | -2.656783000 | -3.284886000 | 2.556501000  |
| 15                                         | 1.092612000  | -0.225935000 | 0.255021000  |
| 6                                          | 0.885766000  | -1.438072000 | 1.486997000  |
| 7                                          | 2.119285000  | -0.455353000 | -1.015974000 |
| 7                                          | 1.399974000  | 1.311856000  | 0.764922000  |
| 6                                          | 0.052617000  | 1.435579000  | 2.896576000  |
| 1                                          | -0.794501000 | 1.862911000  | 2.357997000  |
| 1                                          | -0.110455000 | 0.360244000  | 2.997605000  |
| 1                                          | 0.076156000  | 1.873043000  | 3.897255000  |
| 6                                          | 2.571038000  | 1.272005000  | 2.944658000  |
| 1                                          | 3.490065000  | 1.595724000  | 2.451281000  |
| 1                                          | 2.566733000  | 1.682282000  | 3.957028000  |
| 1                                          | 2.593470000  | 0.184526000  | 3.028663000  |
| 6                                          | 2.701473000  | 3.279941000  | -0.027658000 |
| 1                                          | 3.614219000  | 2.689572000  | 0.076108000  |
| 1                                          | 2.822938000  | 3.942433000  | -0.887407000 |
| 1                                          | 2.604787000  | 3.916343000  | 0.855346000  |
| 6                                          | 0.201504000  | 3.200710000  | -0.305416000 |
| 1                                          | -0.650141000 | 2.556062000  | -0.534534000 |
| 1                                          | -0.005756000 | 3.712611000  | 0.639081000  |
| 1                                          | 0.274423000  | 3.963967000  | -1.083444000 |
| 6                                          | 4.343962000  | 0.448039000  | -1.663640000 |

|   |              |              |              |
|---|--------------|--------------|--------------|
| 1 | 5.362196000  | 0.589986000  | -1.295138000 |
| 1 | 4.419825000  | -0.028200000 | -2.643985000 |
| 1 | 3.889991000  | 1.430975000  | -1.798553000 |
| 6 | 4.158124000  | -1.787009000 | -0.535236000 |
| 1 | 3.599006000  | -2.381282000 | 0.191082000  |
| 1 | 4.158115000  | -2.325192000 | -1.486672000 |
| 1 | 5.194739000  | -1.714964000 | -0.198833000 |
| 6 | 1.626791000  | -2.115896000 | 2.580041000  |
| 1 | 1.398433000  | -1.726716000 | 3.581565000  |
| 1 | 1.423741000  | -3.190356000 | 2.599346000  |
| 1 | 2.706792000  | -2.012292000 | 2.443527000  |
| 6 | 1.351334000  | 1.746529000  | 2.179977000  |
| 6 | 1.484563000  | 2.398042000  | -0.239845000 |
| 1 | 1.413161000  | 2.837019000  | 2.130174000  |
| 1 | 1.610732000  | 1.896075000  | -1.202779000 |
| 6 | 3.556410000  | -0.401113000 | -0.682289000 |
| 1 | 3.618409000  | 0.091837000  | 0.296516000  |
| 6 | 1.757263000  | -1.047813000 | -2.321250000 |
| 1 | 2.716784000  | -1.176075000 | -2.831834000 |
| 6 | 0.943077000  | -0.070659000 | -3.146526000 |
| 1 | 1.521922000  | 0.833204000  | -3.352296000 |
| 1 | 0.661052000  | -0.520993000 | -4.100819000 |
| 1 | 0.017569000  | 0.209532000  | -2.639473000 |
| 6 | 1.130343000  | -2.426994000 | -2.232314000 |
| 1 | 1.724124000  | -3.086310000 | -1.595650000 |
| 1 | 0.115666000  | -2.377969000 | -1.842698000 |
| 1 | 1.081335000  | -2.869061000 | -3.230031000 |
| 5 | -1.917395000 | -0.680950000 | -0.767196000 |
| 6 | -2.641408000 | -3.220683000 | -0.737921000 |
| 1 | -2.996869000 | -4.077951000 | -0.154514000 |
| 1 | -3.345141000 | -3.063933000 | -1.557365000 |
| 1 | -1.676856000 | -3.482511000 | -1.179142000 |
| 6 | -3.908784000 | -1.708501000 | 0.744039000  |
| 1 | -4.608959000 | -1.394777000 | -0.034433000 |
| 1 | -4.326857000 | -2.607415000 | 1.211873000  |
| 1 | -3.878773000 | -0.915948000 | 1.492950000  |
| 6 | -2.628275000 | 0.756595000  | -0.613304000 |
| 6 | -3.031709000 | 1.492682000  | -1.725651000 |
| 6 | -2.811565000 | 1.356013000  | 0.633502000  |
| 6 | -3.576981000 | 2.763894000  | -1.604062000 |
| 1 | -2.903142000 | 1.058212000  | -2.712043000 |
| 6 | -3.356646000 | 2.620190000  | 0.772723000  |
| 1 | -2.502248000 | 0.816015000  | 1.525206000  |
| 6 | -3.740154000 | 3.334668000  | -0.353231000 |
| 1 | -3.874257000 | 3.312908000  | -2.491653000 |
| 1 | -3.477701000 | 3.054533000  | 1.760271000  |



|   |              |              |              |
|---|--------------|--------------|--------------|
| 1 | -4.164574000 | 4.327602000  | -0.254023000 |
| 9 | -1.857416000 | -1.028168000 | -2.133652000 |

**6P<sup>C-F</sup>** (TE= -1832.183239)

|    |              |              |              |
|----|--------------|--------------|--------------|
| 6  | -0.089860000 | -1.631555000 | -0.387210000 |
| 7  | -0.036978000 | -0.288226000 | -0.012785000 |
| 7  | -1.299942000 | -2.163754000 | -0.195463000 |
| 6  | -1.453819000 | -3.565146000 | 0.130436000  |
| 1  | -2.462375000 | -3.895874000 | -0.119159000 |
| 1  | -0.741668000 | -4.147644000 | -0.453699000 |
| 1  | -1.279466000 | -3.730659000 | 1.198359000  |
| 15 | 1.614594000  | -0.407501000 | -0.266520000 |
| 6  | 1.185950000  | -2.019858000 | -0.759935000 |
| 7  | 2.145561000  | 0.717158000  | -1.344720000 |
| 7  | 2.599266000  | -0.274532000 | 1.039064000  |
| 6  | 1.837550000  | -2.251108000 | 2.424159000  |
| 1  | 1.036036000  | -1.618382000 | 2.809588000  |
| 1  | 1.417272000  | -2.896029000 | 1.649706000  |
| 1  | 2.196569000  | -2.890892000 | 3.233536000  |
| 6  | 4.059963000  | -2.259631000 | 1.226569000  |
| 1  | 4.933786000  | -1.655114000 | 0.973811000  |
| 1  | 4.382382000  | -3.063504000 | 1.892192000  |
| 1  | 3.686130000  | -2.719869000 | 0.309616000  |
| 6  | 4.347865000  | 1.305989000  | 1.816982000  |
| 1  | 4.930359000  | 1.093881000  | 0.918081000  |
| 1  | 4.518229000  | 2.348683000  | 2.093547000  |
| 1  | 4.739663000  | 0.689257000  | 2.629713000  |
| 6  | 2.048732000  | 1.348282000  | 2.838547000  |
| 1  | 0.985436000  | 1.186179000  | 2.653264000  |
| 1  | 2.348701000  | 0.702830000  | 3.668833000  |
| 1  | 2.196060000  | 2.382255000  | 3.157856000  |
| 6  | 4.291933000  | 1.878077000  | -1.808327000 |
| 1  | 5.347409000  | 1.701533000  | -2.026090000 |
| 1  | 3.913544000  | 2.559891000  | -2.573590000 |
| 1  | 4.223019000  | 2.380741000  | -0.842324000 |
| 6  | 3.617387000  | -0.133385000 | -3.153945000 |
| 1  | 3.098641000  | -1.094534000 | -3.131216000 |
| 1  | 3.168745000  | 0.474634000  | -3.943732000 |
| 1  | 4.659314000  | -0.310711000 | -3.428462000 |
| 6  | 1.764600000  | -3.251359000 | -1.348837000 |
| 1  | 1.945479000  | -4.046709000 | -0.613930000 |
| 1  | 1.115619000  | -3.669055000 | -2.124016000 |
| 1  | 2.724932000  | -3.042690000 | -1.827811000 |
| 6  | 2.992269000  | -1.418916000 | 1.896739000  |
| 6  | 2.865646000  | 1.075969000  | 1.591412000  |
| 1  | 3.454220000  | -0.950244000 | 2.769662000  |

|   |              |              |              |
|---|--------------|--------------|--------------|
| 1 | 2.534963000  | 1.779036000  | 0.821005000  |
| 6 | 3.541359000  | 0.559571000  | -1.805582000 |
| 1 | 4.028793000  | -0.092586000 | -1.069913000 |
| 6 | 1.270810000  | 1.593456000  | -2.159370000 |
| 1 | 1.941730000  | 2.010914000  | -2.916178000 |
| 6 | 0.758623000  | 2.753623000  | -1.330533000 |
| 1 | 1.592450000  | 3.343228000  | -0.942210000 |
| 1 | 0.128329000  | 3.409082000  | -1.935888000 |
| 1 | 0.153440000  | 2.410371000  | -0.488188000 |
| 6 | 0.177581000  | 0.864578000  | -2.920193000 |
| 1 | 0.590870000  | 0.039799000  | -3.504878000 |
| 1 | -0.586927000 | 0.466611000  | -2.252974000 |
| 1 | -0.307799000 | 1.560728000  | -3.607995000 |
| 5 | -1.243412000 | -0.026218000 | 0.981919000  |
| 7 | -2.115685000 | -1.252686000 | 0.517203000  |
| 6 | -3.430006000 | -1.184639000 | 0.071524000  |
| 6 | -4.373639000 | -0.560053000 | 0.893144000  |
| 6 | -3.856123000 | -1.707239000 | -1.150488000 |
| 6 | -5.683729000 | -0.427791000 | 0.484132000  |
| 1 | -4.050668000 | -0.172235000 | 1.853173000  |
| 6 | -5.179189000 | -1.582800000 | -1.543032000 |
| 1 | -3.137519000 | -2.187881000 | -1.804344000 |
| 6 | -6.101756000 | -0.938290000 | -0.738171000 |
| 1 | -6.393508000 | 0.072275000  | 1.133826000  |
| 1 | -5.486411000 | -1.990283000 | -2.500298000 |
| 1 | -7.134264000 | -0.841328000 | -1.051415000 |
| 6 | -1.888819000 | 1.423225000  | 0.765143000  |
| 6 | -2.495796000 | 1.793073000  | -0.436299000 |
| 6 | -1.774951000 | 2.405414000  | 1.745194000  |
| 6 | -2.958283000 | 3.077663000  | -0.655524000 |
| 1 | -2.610340000 | 1.053879000  | -1.225474000 |
| 6 | -2.224119000 | 3.702127000  | 1.534463000  |
| 1 | -1.318410000 | 2.147397000  | 2.695679000  |
| 6 | -2.816197000 | 4.043117000  | 0.331059000  |
| 1 | -3.429420000 | 3.330447000  | -1.599423000 |
| 1 | -2.114637000 | 4.447456000  | 2.315243000  |
| 1 | -3.172201000 | 5.053529000  | 0.162747000  |
| 9 | -0.824201000 | -0.211655000 | 2.310729000  |

**7P<sup>C-F</sup>** (TE= -930.333576)

|   |              |              |              |
|---|--------------|--------------|--------------|
| 6 | -0.946974000 | -2.161881000 | -1.210326000 |
| 6 | 0.382133000  | -2.043880000 | -1.108469000 |
| 1 | -1.542440000 | -2.835278000 | -1.807652000 |
| 1 | 1.086981000  | -2.633774000 | -1.679892000 |
| 6 | -2.909885000 | -0.692764000 | -0.555808000 |
| 6 | -2.867648000 | -1.596015000 | 0.343872000  |

|   |              |              |              |
|---|--------------|--------------|--------------|
| 7 | -1.566456000 | -1.257070000 | -0.278561000 |
| 7 | 0.812463000  | -1.132203000 | -0.184391000 |
| 5 | -0.391176000 | -0.468337000 | 0.530221000  |
| 6 | 2.137101000  | -0.738007000 | -0.055090000 |
| 6 | 3.099510000  | -0.992789000 | -1.035049000 |
| 6 | 2.529842000  | -0.036596000 | 1.088616000  |
| 6 | 4.408089000  | -0.578330000 | -0.862177000 |
| 1 | 2.822535000  | -1.497735000 | -1.953019000 |
| 6 | 3.835679000  | 0.384344000  | 1.243417000  |
| 1 | 1.797376000  | 0.164441000  | 1.861600000  |
| 6 | 4.790242000  | 0.112699000  | 0.275064000  |
| 1 | 5.134958000  | -0.788731000 | -1.639086000 |
| 1 | 4.112471000  | 0.926826000  | 2.140592000  |
| 1 | 5.814856000  | 0.440085000  | 0.402867000  |
| 6 | -3.273761000 | -2.567753000 | 1.348326000  |
| 1 | -2.826192000 | -2.323992000 | 2.313291000  |
| 1 | -4.358032000 | -2.587781000 | 1.448371000  |
| 1 | -2.925181000 | -3.563082000 | 1.062097000  |
| 6 | -3.399623000 | 0.300203000  | -1.500970000 |
| 1 | -4.487564000 | 0.285572000  | -1.548889000 |
| 1 | -3.065636000 | 1.300135000  | -1.211960000 |
| 1 | -2.993877000 | 0.090966000  | -2.494165000 |
| 6 | -0.552073000 | 1.099198000  | 0.274980000  |
| 6 | -1.212972000 | 1.918482000  | 1.187400000  |
| 6 | -0.144097000 | 1.673647000  | -0.929075000 |
| 6 | -1.465855000 | 3.253779000  | 0.909998000  |
| 1 | -1.537155000 | 1.497120000  | 2.134408000  |
| 6 | -0.388007000 | 3.006166000  | -1.215606000 |
| 1 | 0.378161000  | 1.058985000  | -1.659364000 |
| 6 | -1.055462000 | 3.800427000  | -0.295068000 |
| 1 | -1.982182000 | 3.871690000  | 1.636816000  |
| 1 | -0.055829000 | 3.430071000  | -2.157049000 |
| 1 | -1.248411000 | 4.844609000  | -0.514473000 |
| 9 | -0.520939000 | -0.828791000 | 1.870095000  |

**9P<sup>C-F</sup>** (TE= -1700.603096)

|    |              |              |              |
|----|--------------|--------------|--------------|
| 6  | -0.251529000 | -1.263452000 | -1.426483000 |
| 7  | -0.336258000 | -0.288462000 | -0.361362000 |
| 15 | 1.319184000  | -0.207490000 | -0.425641000 |
| 6  | 1.124372000  | -1.270502000 | -1.752079000 |
| 7  | 1.901294000  | 1.340105000  | -0.617732000 |
| 7  | 2.149846000  | -0.737480000 | 0.910483000  |
| 6  | 1.210901000  | -3.086393000 | 0.997599000  |
| 1  | 0.346669000  | -2.697295000 | 1.539913000  |
| 1  | 0.924977000  | -3.204947000 | -0.049835000 |
| 1  | 1.456120000  | -4.073943000 | 1.396569000  |

|   |              |              |              |
|---|--------------|--------------|--------------|
| 6 | 3.607178000  | -2.650148000 | 0.349009000  |
| 1 | 4.485444000  | -2.032425000 | 0.550458000  |
| 1 | 3.850665000  | -3.685054000 | 0.602000000  |
| 1 | 3.399170000  | -2.608450000 | -0.721623000 |
| 6 | 3.701086000  | 0.115906000  | 2.653547000  |
| 1 | 4.447826000  | 0.306241000  | 1.879435000  |
| 1 | 3.804422000  | 0.886679000  | 3.420957000  |
| 1 | 3.937462000  | -0.841544000 | 3.124970000  |
| 6 | 1.245614000  | -0.134563000 | 3.145692000  |
| 1 | 0.237950000  | -0.046043000 | 2.733658000  |
| 1 | 1.348196000  | -1.141737000 | 3.560178000  |
| 1 | 1.348479000  | 0.573076000  | 3.971780000  |
| 6 | 4.033340000  | 2.518452000  | -0.144644000 |
| 1 | 5.110166000  | 2.484551000  | -0.325037000 |
| 1 | 3.686756000  | 3.512147000  | -0.439814000 |
| 1 | 3.863710000  | 2.405374000  | 0.927534000  |
| 6 | 3.596095000  | 1.567255000  | -2.427012000 |
| 1 | 3.102570000  | 0.768682000  | -2.985241000 |
| 1 | 3.231725000  | 2.525235000  | -2.807576000 |
| 1 | 4.668286000  | 1.520980000  | -2.630769000 |
| 6 | 1.893028000  | -2.064807000 | -2.736928000 |
| 1 | 1.888662000  | -3.145147000 | -2.526375000 |
| 1 | 1.507882000  | -1.941547000 | -3.755272000 |
| 1 | 2.941710000  | -1.755139000 | -2.764184000 |
| 6 | 2.414619000  | -2.172645000 | 1.153947000  |
| 6 | 2.293811000  | 0.147572000  | 2.085933000  |
| 1 | 2.699166000  | -2.224632000 | 2.208886000  |
| 1 | 2.116925000  | 1.158757000  | 1.711508000  |
| 6 | 3.339428000  | 1.424730000  | -0.936320000 |
| 1 | 3.773588000  | 0.467091000  | -0.620217000 |
| 6 | 1.072051000  | 2.503383000  | -0.985038000 |
| 1 | 1.791248000  | 3.279767000  | -1.266560000 |
| 6 | 0.322272000  | 3.022349000  | 0.226514000  |
| 1 | 1.024885000  | 3.327446000  | 1.006123000  |
| 1 | -0.294929000 | 3.884919000  | -0.036746000 |
| 1 | -0.341343000 | 2.261689000  | 0.642036000  |
| 6 | 0.182716000  | 2.283526000  | -2.197503000 |
| 1 | 0.775067000  | 2.005917000  | -3.071389000 |
| 1 | -0.548559000 | 1.495639000  | -2.020100000 |
| 1 | -0.358452000 | 3.204967000  | -2.427861000 |
| 5 | -1.648680000 | -0.433975000 | 0.414416000  |
| 6 | -1.444480000 | -1.858825000 | -1.663224000 |
| 1 | -1.699299000 | -2.681522000 | -2.314546000 |
| 6 | -3.843010000 | -1.542936000 | -0.877386000 |
| 6 | -3.339782000 | -2.443428000 | -0.122667000 |
| 7 | -2.388416000 | -1.437115000 | -0.640462000 |

|   |              |              |              |
|---|--------------|--------------|--------------|
| 6 | -4.797493000 | -0.857648000 | -1.740148000 |
| 1 | -5.708731000 | -1.443817000 | -1.854982000 |
| 1 | -5.053796000 | 0.124803000  | -1.337548000 |
| 1 | -4.347183000 | -0.705879000 | -2.725080000 |
| 6 | -3.162349000 | -3.661429000 | 0.655030000  |
| 1 | -2.998328000 | -3.423793000 | 1.707646000  |
| 1 | -4.023081000 | -4.323079000 | 0.565018000  |
| 1 | -2.271095000 | -4.182413000 | 0.293534000  |
| 6 | -2.483262000 | 0.911880000  | 0.638922000  |
| 6 | -2.911507000 | 1.678605000  | -0.445034000 |
| 6 | -2.751866000 | 1.405288000  | 1.912520000  |
| 6 | -3.565525000 | 2.885777000  | -0.273518000 |
| 1 | -2.708427000 | 1.325874000  | -1.454458000 |
| 6 | -3.398120000 | 2.619154000  | 2.100091000  |
| 1 | -2.433943000 | 0.829390000  | 2.776392000  |
| 6 | -3.805593000 | 3.364329000  | 1.006790000  |
| 1 | -3.881916000 | 3.461597000  | -1.136968000 |
| 1 | -3.584862000 | 2.985091000  | 3.104143000  |
| 1 | -4.309789000 | 4.313691000  | 1.149240000  |
| 9 | -1.525289000 | -1.161878000 | 1.610065000  |

**IIIa-PC-F** (TE= -1340.868236)

|    |              |              |              |
|----|--------------|--------------|--------------|
| 13 | 0.000020000  | -0.166564000 | 0.767955000  |
| 7  | 1.407629000  | -1.214325000 | 0.067264000  |
| 7  | -1.407519000 | -1.214410000 | 0.067244000  |
| 6  | 1.252304000  | -2.447313000 | -0.402719000 |
| 6  | -1.252118000 | -2.447382000 | -0.402754000 |
| 6  | 0.000112000  | -3.041770000 | -0.569861000 |
| 1  | 0.000146000  | -4.067452000 | -0.913055000 |
| 6  | 2.688291000  | -0.594010000 | 0.103939000  |
| 6  | 3.259257000  | -0.283293000 | 1.330931000  |
| 6  | 3.323132000  | -0.202643000 | -1.068370000 |
| 6  | 4.467392000  | 0.392252000  | 1.381641000  |
| 6  | 4.530435000  | 0.468772000  | -1.011940000 |
| 6  | 5.107557000  | 0.766043000  | 0.212835000  |
| 1  | 4.906967000  | 0.630145000  | 2.343126000  |
| 1  | 5.016960000  | 0.774727000  | -1.930728000 |
| 1  | 6.050023000  | 1.298781000  | 0.254546000  |
| 6  | -2.688215000 | -0.594163000 | 0.103920000  |
| 6  | -3.323035000 | -0.202739000 | -1.068382000 |
| 6  | -3.259232000 | -0.283555000 | 1.330915000  |
| 6  | -4.530366000 | 0.468625000  | -1.011942000 |
| 6  | -4.467396000 | 0.391938000  | 1.381635000  |
| 6  | -5.107538000 | 0.765787000  | 0.212836000  |
| 1  | -5.016874000 | 0.774626000  | -1.930724000 |
| 1  | -4.907011000 | 0.629747000  | 2.343123000  |

|   |              |              |              |
|---|--------------|--------------|--------------|
| 1 | -6.050025000 | 1.298486000  | 0.254555000  |
| 6 | -2.453076000 | -3.259116000 | -0.769011000 |
| 1 | -2.192237000 | -4.311879000 | -0.855955000 |
| 1 | -3.245208000 | -3.143488000 | -0.027205000 |
| 1 | -2.865668000 | -2.934714000 | -1.726678000 |
| 6 | 2.453311000  | -3.258986000 | -0.768955000 |
| 1 | 2.192560000  | -4.311788000 | -0.855692000 |
| 1 | 2.865762000  | -2.934717000 | -1.726729000 |
| 1 | 3.245512000  | -3.143157000 | -0.027257000 |
| 1 | -2.743722000 | -0.573190000 | 2.240270000  |
| 1 | -2.849517000 | -0.410736000 | -2.022172000 |
| 1 | 2.849649000  | -0.410723000 | -2.022159000 |
| 1 | 2.743734000  | -0.572890000 | 2.240290000  |
| 6 | -0.000061000 | 1.643819000  | 0.050182000  |
| 6 | -0.000215000 | 2.791454000  | 0.844917000  |
| 6 | -0.000013000 | 1.834406000  | -1.334571000 |
| 6 | -0.000317000 | 4.063031000  | 0.291146000  |
| 1 | -0.000256000 | 2.690808000  | 1.927390000  |
| 6 | -0.000112000 | 3.098125000  | -1.902296000 |
| 1 | 0.000094000  | 0.967044000  | -1.995243000 |
| 6 | -0.000265000 | 4.217866000  | -1.085326000 |
| 1 | -0.000345000 | 5.210553000  | -1.522091000 |
| 9 | -0.000007000 | -0.240768000 | 2.442424000  |
| 1 | -0.000438000 | 4.936918000  | 0.934108000  |
| 1 | -0.000071000 | 3.213400000  | -2.981131000 |

Cartesian coordinates of the C–H (*para*, *meta* and *ortho*) splitting product obtained from **4-7** and **9**, along with their total energies (in hartrees) including zero point vibrational correction.

**4P<sup>p</sup>(C-F)** (TE= -2044.899005)

|    |              |              |              |
|----|--------------|--------------|--------------|
| 6  | -0.305468000 | -1.291933000 | 1.126576000  |
| 6  | -2.503530000 | -0.858033000 | 0.548989000  |
| 7  | -0.181077000 | -0.435889000 | 0.027466000  |
| 7  | -1.562346000 | -1.564767000 | 1.418132000  |
| 6  | -1.954971000 | -2.274102000 | 2.602864000  |
| 1  | -2.405250000 | -3.244530000 | 2.363716000  |
| 1  | -1.089417000 | -2.451341000 | 3.241978000  |
| 1  | -2.693634000 | -1.682878000 | 3.153233000  |
| 15 | -3.763010000 | -1.737158000 | -0.165865000 |
| 6  | -4.979738000 | -2.460015000 | 0.968705000  |
| 1  | -5.828207000 | -2.848684000 | 0.401648000  |
| 1  | -4.537908000 | -3.281645000 | 1.533522000  |
| 1  | -5.323763000 | -1.695183000 | 1.665183000  |
| 6  | -3.426276000 | -3.151613000 | -1.286213000 |
| 1  | -4.338093000 | -3.602607000 | -1.685148000 |
| 1  | -2.803079000 | -2.798598000 | -2.110247000 |

|    |              |              |              |
|----|--------------|--------------|--------------|
| 1  | -2.866849000 | -3.909182000 | -0.731024000 |
| 6  | -4.693468000 | -0.587279000 | -1.188043000 |
| 1  | -5.549571000 | -1.094538000 | -1.636156000 |
| 1  | -5.031950000 | 0.248114000  | -0.575442000 |
| 1  | -4.039634000 | -0.204261000 | -1.973059000 |
| 15 | 1.456679000  | -0.524681000 | 0.257812000  |
| 6  | 0.998117000  | -1.550846000 | 1.575482000  |
| 7  | 2.223032000  | -1.132490000 | -1.078954000 |
| 7  | 2.293436000  | 0.851052000  | 0.617134000  |
| 6  | 1.138198000  | 1.533698000  | 2.753176000  |
| 1  | 0.421057000  | 2.115075000  | 2.170302000  |
| 1  | 0.684648000  | 0.567942000  | 2.987802000  |
| 1  | 1.325304000  | 2.061347000  | 3.691411000  |
| 6  | 3.473922000  | 0.577241000  | 2.774717000  |
| 1  | 4.426189000  | 0.550519000  | 2.240006000  |
| 1  | 3.644430000  | 1.034983000  | 3.751980000  |
| 1  | 3.145282000  | -0.449578000 | 2.942098000  |
| 6  | 4.079128000  | 2.231627000  | -0.413956000 |
| 1  | 4.747967000  | 1.368400000  | -0.389381000 |
| 1  | 4.319815000  | 2.823018000  | -1.300264000 |
| 1  | 4.296062000  | 2.854811000  | 0.457398000  |
| 6  | 1.678124000  | 2.990509000  | -0.477644000 |
| 1  | 0.640569000  | 2.655929000  | -0.547293000 |
| 1  | 1.779062000  | 3.605455000  | 0.421245000  |
| 1  | 1.889199000  | 3.630873000  | -1.337192000 |
| 6  | 4.506595000  | -1.035302000 | -2.047152000 |
| 1  | 5.559271000  | -1.210045000 | -1.814040000 |
| 1  | 4.287252000  | -1.572750000 | -2.973082000 |
| 1  | 4.370988000  | 0.031257000  | -2.234759000 |
| 6  | 3.802707000  | -3.001725000 | -0.652882000 |
| 1  | 3.190643000  | -3.329454000 | 0.190503000  |
| 1  | 3.514306000  | -3.587146000 | -1.530042000 |
| 1  | 4.846945000  | -3.234500000 | -0.432805000 |
| 6  | 1.586254000  | -2.439589000 | 2.607129000  |
| 1  | 1.520701000  | -2.040388000 | 3.629310000  |
| 1  | 1.113487000  | -3.427796000 | 2.619385000  |
| 1  | 2.648695000  | -2.611875000 | 2.411948000  |
| 6  | 2.442397000  | 1.368763000  | 1.996462000  |
| 6  | 2.623586000  | 1.805637000  | -0.464199000 |
| 1  | 2.849377000  | 2.375354000  | 1.866147000  |
| 1  | 2.473931000  | 1.254827000  | -1.397153000 |
| 6  | 3.636217000  | -1.512396000 | -0.898739000 |
| 1  | 3.972378000  | -0.988705000 | 0.005726000  |
| 6  | 1.521261000  | -1.700997000 | -2.248630000 |
| 1  | 2.307953000  | -2.203112000 | -2.820662000 |
| 6  | 0.966017000  | -0.596982000 | -3.126944000 |

|   |              |              |              |
|---|--------------|--------------|--------------|
| 1 | 1.768985000  | 0.055270000  | -3.479076000 |
| 1 | 0.461068000  | -1.019317000 | -3.999248000 |
| 1 | 0.233697000  | 0.006810000  | -2.585570000 |
| 6 | 0.486604000  | -2.764381000 | -1.916950000 |
| 1 | 0.906199000  | -3.529911000 | -1.260595000 |
| 1 | -0.389497000 | -2.332572000 | -1.431960000 |
| 1 | 0.157204000  | -3.250050000 | -2.839102000 |
| 5 | -1.603739000 | 0.018277000  | -0.523260000 |
| 1 | -1.739129000 | -0.336471000 | -1.697856000 |
| 6 | -1.796815000 | 1.618799000  | -0.460583000 |
| 6 | -1.820512000 | 2.408163000  | -1.607850000 |
| 6 | -1.921082000 | 2.286933000  | 0.758820000  |
| 6 | -1.935640000 | 3.792389000  | -1.560261000 |
| 1 | -1.742195000 | 1.920614000  | -2.577524000 |
| 6 | -2.025709000 | 3.664999000  | 0.844636000  |
| 1 | -1.944192000 | 1.694413000  | 1.671241000  |
| 6 | -2.026858000 | 4.396840000  | -0.326882000 |
| 1 | -1.954384000 | 4.400612000  | -2.457567000 |
| 1 | -2.115854000 | 4.178774000  | 1.795450000  |
| 9 | -2.133563000 | 5.734575000  | -0.258677000 |

**4P<sup>m</sup>(C-F)** (TE= -2044.899966)

|    |              |              |              |
|----|--------------|--------------|--------------|
| 6  | -0.332236000 | -1.403890000 | 1.013236000  |
| 6  | -2.521061000 | -0.811910000 | 0.562889000  |
| 7  | -0.198772000 | -0.409068000 | 0.038857000  |
| 7  | -1.592380000 | -1.669072000 | 1.297904000  |
| 6  | -1.989008000 | -2.521137000 | 2.382681000  |
| 1  | -2.499311000 | -3.422184000 | 2.022879000  |
| 1  | -1.116419000 | -2.833651000 | 2.956938000  |
| 1  | -2.677326000 | -1.979931000 | 3.039772000  |
| 15 | -3.863955000 | -1.509492000 | -0.194993000 |
| 6  | -5.082416000 | -2.289713000 | 0.899304000  |
| 1  | -5.975056000 | -2.555198000 | 0.329026000  |
| 1  | -4.674314000 | -3.198464000 | 1.343389000  |
| 1  | -5.349019000 | -1.594812000 | 1.695901000  |
| 6  | -3.676421000 | -2.788859000 | -1.498401000 |
| 1  | -4.634224000 | -3.128667000 | -1.899877000 |
| 1  | -3.069905000 | -2.374057000 | -2.305810000 |
| 1  | -3.145011000 | -3.643854000 | -1.072427000 |
| 6  | -4.748487000 | -0.178934000 | -1.019761000 |
| 1  | -5.647738000 | -0.569279000 | -1.499315000 |
| 1  | -5.015711000 | 0.585823000  | -0.290653000 |
| 1  | -4.094593000 | 0.266593000  | -1.771123000 |
| 15 | 1.439469000  | -0.585212000 | 0.211093000  |
| 6  | 0.970042000  | -1.767488000 | 1.386526000  |
| 7  | 2.153919000  | -1.029554000 | -1.215435000 |



|   |              |              |              |
|---|--------------|--------------|--------------|
| 7 | 2.335163000  | 0.697624000  | 0.734130000  |
| 6 | 1.260805000  | 1.112718000  | 2.979352000  |
| 1 | 0.545900000  | 1.784611000  | 2.500445000  |
| 1 | 0.783434000  | 0.137784000  | 3.101036000  |
| 1 | 1.491119000  | 1.507025000  | 3.971977000  |
| 6 | 3.559742000  | 0.088278000  | 2.796656000  |
| 1 | 4.497174000  | 0.105599000  | 2.236051000  |
| 1 | 3.770312000  | 0.399384000  | 3.822590000  |
| 1 | 3.198843000  | -0.940859000 | 2.829708000  |
| 6 | 4.153350000  | 2.140440000  | -0.145084000 |
| 1 | 4.787445000  | 1.258242000  | -0.255914000 |
| 1 | 4.398700000  | 2.838725000  | -0.948433000 |
| 1 | 4.413227000  | 2.629429000  | 0.797266000  |
| 6 | 1.785210000  | 2.989763000  | -0.041989000 |
| 1 | 0.733528000  | 2.707931000  | -0.127819000 |
| 1 | 1.930532000  | 3.471764000  | 0.929125000  |
| 1 | 2.004433000  | 3.732816000  | -0.812144000 |
| 6 | 4.427587000  | -0.902044000 | -2.204111000 |
| 1 | 5.472778000  | -1.160676000 | -2.020625000 |
| 1 | 4.168349000  | -1.287745000 | -3.193186000 |
| 1 | 4.344996000  | 0.185679000  | -2.232831000 |
| 6 | 3.645546000  | -3.012896000 | -1.092137000 |
| 1 | 3.026789000  | -3.430278000 | -0.294584000 |
| 1 | 3.320681000  | -3.451758000 | -2.039325000 |
| 1 | 4.679498000  | -3.322922000 | -0.925260000 |
| 6 | 1.546951000  | -2.808051000 | 2.272072000  |
| 1 | 1.517280000  | -2.550656000 | 3.340437000  |
| 1 | 1.039358000  | -3.772594000 | 2.161687000  |
| 1 | 2.598057000  | -2.986709000 | 2.027838000  |
| 6 | 2.537614000  | 1.012888000  | 2.166664000  |
| 6 | 2.681275000  | 1.779272000  | -0.214944000 |
| 1 | 2.976337000  | 2.014591000  | 2.164448000  |
| 1 | 2.490493000  | 1.368293000  | -1.210317000 |
| 6 | 3.549076000  | -1.497506000 | -1.119028000 |
| 1 | 3.922132000  | -1.125606000 | -0.155682000 |
| 6 | 1.408862000  | -1.396759000 | -2.437389000 |
| 1 | 2.165750000  | -1.835544000 | -3.095307000 |
| 6 | 0.877379000  | -0.159107000 | -3.132963000 |
| 1 | 1.696106000  | 0.510410000  | -3.407837000 |
| 1 | 0.339705000  | -0.433659000 | -4.043822000 |
| 1 | 0.178695000  | 0.384176000  | -2.492399000 |
| 6 | 0.342429000  | -2.461866000 | -2.238641000 |
| 1 | 0.741841000  | -3.322901000 | -1.698395000 |
| 1 | -0.513449000 | -2.071722000 | -1.687375000 |
| 1 | -0.012669000 | -2.806002000 | -3.213324000 |
| 5 | -1.612106000 | 0.164511000  | -0.405762000 |

|   |              |              |              |
|---|--------------|--------------|--------------|
| 1 | -1.791086000 | -0.016578000 | -1.613380000 |
| 6 | -1.733054000 | 1.749853000  | -0.116996000 |
| 6 | -1.749932000 | 2.678568000  | -1.154745000 |
| 6 | -1.789746000 | 2.251891000  | 1.185566000  |
| 6 | -1.796599000 | 4.031767000  | -0.883467000 |
| 1 | -1.720333000 | 2.347736000  | -2.190268000 |
| 6 | -1.825159000 | 3.609893000  | 1.446145000  |
| 1 | -1.814070000 | 1.542851000  | 2.010163000  |
| 6 | -1.825242000 | 4.526443000  | 0.401480000  |
| 1 | -1.859072000 | 3.970685000  | 2.469221000  |
| 1 | -1.859262000 | 5.595947000  | 0.570270000  |
| 9 | -1.809071000 | 4.901004000  | -1.909013000 |

**4P<sup>o</sup>(C-F)** (TE= -2044.900132)

|    |              |              |              |
|----|--------------|--------------|--------------|
| 6  | -0.394925000 | -1.191153000 | 1.154055000  |
| 6  | -2.558556000 | -0.552847000 | 0.637676000  |
| 7  | -0.217017000 | -0.312569000 | 0.080174000  |
| 7  | -1.665342000 | -1.364927000 | 1.463148000  |
| 6  | -2.097931000 | -2.088913000 | 2.624521000  |
| 1  | -2.624559000 | -3.011493000 | 2.353581000  |
| 1  | -1.241567000 | -2.357792000 | 3.243755000  |
| 1  | -2.782399000 | -1.465420000 | 3.208206000  |
| 15 | -3.898923000 | -1.288160000 | -0.092687000 |
| 6  | -5.152496000 | -1.961014000 | 1.031832000  |
| 1  | -6.039965000 | -2.250565000 | 0.465281000  |
| 1  | -4.771463000 | -2.842234000 | 1.549397000  |
| 1  | -5.419356000 | -1.204040000 | 1.769461000  |
| 6  | -3.707888000 | -2.666033000 | -1.290934000 |
| 1  | -4.662928000 | -3.010425000 | -1.695058000 |
| 1  | -3.067365000 | -2.327192000 | -2.107542000 |
| 1  | -3.212457000 | -3.499977000 | -0.786814000 |
| 6  | -4.744071000 | -0.010587000 | -1.035575000 |
| 1  | -5.632614000 | -0.425967000 | -1.514228000 |
| 1  | -5.025713000 | 0.804831000  | -0.369170000 |
| 1  | -4.063915000 | 0.375587000  | -1.796780000 |
| 15 | 1.410340000  | -0.552994000 | 0.267383000  |
| 6  | 0.889526000  | -1.578126000 | 1.563621000  |
| 7  | 2.090239000  | -1.178424000 | -1.106774000 |
| 7  | 2.372678000  | 0.731697000  | 0.649833000  |
| 6  | 1.346735000  | 1.444701000  | 2.842615000  |
| 1  | 0.671650000  | 2.112865000  | 2.303898000  |
| 1  | 0.809635000  | 0.518793000  | 3.060091000  |
| 1  | 1.611252000  | 1.917205000  | 3.791675000  |
| 6  | 3.578618000  | 0.269588000  | 2.759899000  |
| 1  | 4.509678000  | 0.172950000  | 2.196596000  |
| 1  | 3.817390000  | 0.672027000  | 3.747136000  |

|   |              |              |              |
|---|--------------|--------------|--------------|
| 1 | 3.157472000  | -0.726938000 | 2.900648000  |
| 6 | 4.238815000  | 1.995023000  | -0.390627000 |
| 1 | 4.833088000  | 1.078994000  | -0.410257000 |
| 1 | 4.503597000  | 2.590764000  | -1.267104000 |
| 1 | 4.531649000  | 2.571438000  | 0.490667000  |
| 6 | 1.911528000  | 2.954156000  | -0.352615000 |
| 1 | 0.847199000  | 2.712301000  | -0.393787000 |
| 1 | 2.093853000  | 3.527581000  | 0.560821000  |
| 1 | 2.148370000  | 3.602647000  | -1.199176000 |
| 6 | 4.349527000  | -1.236182000 | -2.134251000 |
| 1 | 5.388895000  | -1.507581000 | -1.936614000 |
| 1 | 4.062100000  | -1.718992000 | -3.071543000 |
| 1 | 4.300951000  | -0.155982000 | -2.281504000 |
| 6 | 3.518182000  | -3.186105000 | -0.789079000 |
| 1 | 2.905928000  | -3.492924000 | 0.061952000  |
| 1 | 3.155525000  | -3.712877000 | -1.675788000 |
| 1 | 4.545146000  | -3.512802000 | -0.610996000 |
| 6 | 1.416910000  | -2.555878000 | 2.546434000  |
| 1 | 1.417884000  | -2.190045000 | 3.583084000  |
| 1 | 0.850908000  | -3.493792000 | 2.539408000  |
| 1 | 2.451915000  | -2.822387000 | 2.313351000  |
| 6 | 2.607113000  | 1.183113000  | 2.040281000  |
| 6 | 2.751743000  | 1.693630000  | -0.408789000 |
| 1 | 3.105884000  | 2.150212000  | 1.931008000  |
| 1 | 2.528966000  | 1.191506000  | -1.354621000 |
| 6 | 3.470683000  | -1.680079000 | -0.978932000 |
| 1 | 3.871805000  | -1.219265000 | -0.066898000 |
| 6 | 1.315396000  | -1.643386000 | -2.276739000 |
| 1 | 2.044407000  | -2.187321000 | -2.885874000 |
| 6 | 0.831738000  | -0.467508000 | -3.102239000 |
| 1 | 1.676863000  | 0.131261000  | -3.450744000 |
| 1 | 0.278273000  | -0.817402000 | -3.977130000 |
| 1 | 0.159011000  | 0.174006000  | -2.528544000 |
| 6 | 0.204915000  | -2.629535000 | -1.952706000 |
| 1 | 0.573783000  | -3.447856000 | -1.330348000 |
| 1 | -0.621773000 | -2.142935000 | -1.434106000 |
| 1 | -0.184013000 | -3.055913000 | -2.880952000 |
| 5 | -1.604053000 | 0.275264000  | -0.427237000 |
| 1 | -1.796257000 | -0.034066000 | -1.595542000 |
| 6 | -1.656713000 | 1.888054000  | -0.259009000 |
| 6 | -1.645992000 | 2.802188000  | -1.298325000 |
| 6 | -1.688824000 | 2.458281000  | 1.015841000  |
| 6 | -1.647002000 | 4.176525000  | -1.131015000 |
| 6 | -1.675365000 | 3.824603000  | 1.234713000  |
| 1 | -1.731886000 | 1.778379000  | 1.864418000  |
| 6 | -1.652501000 | 4.692679000  | 0.151715000  |

|   |              |             |              |
|---|--------------|-------------|--------------|
| 1 | -1.690354000 | 4.216630000 | 2.246170000  |
| 1 | -1.648385000 | 5.766093000 | 0.303483000  |
| 1 | -1.636176000 | 4.818320000 | -2.004663000 |
| 9 | -1.618867000 | 2.361021000 | -2.573492000 |

**5P<sup>p(C-F)</sup>** (TE= -1663.730917)

|    |              |              |              |
|----|--------------|--------------|--------------|
| 6  | -0.217521000 | 1.784345000  | 0.799371000  |
| 6  | 1.681973000  | 2.781739000  | -0.158048000 |
| 7  | 0.113225000  | 0.886776000  | -0.216648000 |
| 7  | 0.665511000  | 2.761658000  | 0.940878000  |
| 6  | 0.459356000  | 3.858125000  | 1.851511000  |
| 1  | -0.100318000 | 4.681364000  | 1.393697000  |
| 1  | -0.089035000 | 3.513005000  | 2.728752000  |
| 1  | 1.421796000  | 4.245653000  | 2.188601000  |
| 15 | -1.241147000 | 0.032636000  | 0.215052000  |
| 6  | -1.403824000 | 1.325753000  | 1.370068000  |
| 7  | -2.289846000 | -0.134892000 | -1.049475000 |
| 7  | -1.076157000 | -1.495303000 | 0.815536000  |
| 6  | 0.267947000  | -1.079250000 | 2.912397000  |
| 1  | 1.199860000  | -1.270194000 | 2.378122000  |
| 1  | 0.104667000  | 0.000244000  | 2.945456000  |
| 1  | 0.384050000  | -1.438717000 | 3.937397000  |
| 6  | -2.184040000 | -1.668529000 | 3.021303000  |
| 1  | -2.970764000 | -2.276910000 | 2.569693000  |
| 1  | -2.049010000 | -1.999981000 | 4.053373000  |
| 1  | -2.526428000 | -0.632990000 | 3.048980000  |
| 6  | -1.712123000 | -3.811400000 | 0.162687000  |
| 1  | -2.762563000 | -3.525330000 | 0.247778000  |
| 1  | -1.622740000 | -4.532156000 | -0.653021000 |
| 1  | -1.424472000 | -4.329821000 | 1.080589000  |
| 6  | 0.640562000  | -2.983808000 | -0.180102000 |
| 1  | 1.248300000  | -2.121308000 | -0.464351000 |
| 1  | 1.002866000  | -3.351827000 | 0.784427000  |
| 1  | 0.801590000  | -3.775846000 | -0.914864000 |
| 6  | -4.133357000 | -1.702191000 | -1.620267000 |
| 1  | -5.065429000 | -2.121688000 | -1.235620000 |
| 1  | -4.339583000 | -1.327555000 | -2.625674000 |
| 1  | -3.404370000 | -2.509842000 | -1.702347000 |
| 6  | -4.638291000 | 0.543436000  | -0.617545000 |
| 1  | -4.288261000 | 1.319088000  | 0.067412000  |
| 1  | -4.798131000 | 1.001530000  | -1.597157000 |
| 1  | -5.605755000 | 0.180604000  | -0.263623000 |
| 6  | -2.311782000 | 1.819599000  | 2.435098000  |
| 1  | -1.973480000 | 1.585353000  | 3.453804000  |
| 1  | -2.444937000 | 2.903960000  | 2.382894000  |
| 1  | -3.309693000 | 1.384670000  | 2.330319000  |

|   |              |              |              |
|---|--------------|--------------|--------------|
| 6 | -0.885955000 | -1.806446000 | 2.250757000  |
| 6 | -0.827510000 | -2.612391000 | -0.125459000 |
| 1 | -0.620906000 | -2.867108000 | 2.265550000  |
| 1 | -1.108295000 | -2.231710000 | -1.111014000 |
| 6 | -3.644775000 | -0.601652000 | -0.696200000 |
| 1 | -3.558639000 | -1.034877000 | 0.308692000  |
| 6 | -2.116273000 | 0.471364000  | -2.385591000 |
| 1 | -3.065121000 | 0.278153000  | -2.895531000 |
| 6 | -1.034450000 | -0.245984000 | -3.169533000 |
| 1 | -1.288924000 | -1.299921000 | -3.305394000 |
| 1 | -0.918307000 | 0.206073000  | -4.157226000 |
| 1 | -0.066479000 | -0.180549000 | -2.666096000 |
| 6 | -1.929169000 | 1.977049000  | -2.369908000 |
| 1 | -2.692413000 | 2.462422000  | -1.758125000 |
| 1 | -0.947246000 | 2.246447000  | -1.983226000 |
| 1 | -2.007378000 | 2.366845000  | -3.387328000 |
| 5 | 1.467661000  | 1.302685000  | -0.922986000 |
| 6 | 1.355054000  | 3.935965000  | -1.095054000 |
| 1 | 1.435395000  | 4.910092000  | -0.596780000 |
| 1 | 2.054662000  | 3.934871000  | -1.934103000 |
| 1 | 0.347013000  | 3.845967000  | -1.507692000 |
| 6 | 3.065637000  | 3.009464000  | 0.420973000  |
| 1 | 3.812268000  | 2.879475000  | -0.366725000 |
| 1 | 3.188477000  | 4.024122000  | 0.818121000  |
| 1 | 3.303901000  | 2.300483000  | 1.215336000  |
| 6 | 2.600066000  | 0.182130000  | -0.698941000 |
| 6 | 3.218683000  | -0.449904000 | -1.775809000 |
| 6 | 2.971787000  | -0.260104000 | 0.573019000  |
| 6 | 4.146517000  | -1.470703000 | -1.611389000 |
| 1 | 2.954390000  | -0.138613000 | -2.782974000 |
| 6 | 3.893306000  | -1.272973000 | 0.775036000  |
| 1 | 2.509023000  | 0.198707000  | 1.443292000  |
| 6 | 4.465902000  | -1.866254000 | -0.332052000 |
| 1 | 4.617157000  | -1.960455000 | -2.456164000 |
| 1 | 4.169443000  | -1.610168000 | 1.768047000  |
| 9 | 5.356291000  | -2.854304000 | -0.153923000 |
| 1 | 1.310635000  | 1.482259000  | -2.120805000 |

**5P<sup>m</sup>(C-F)** (TE= -1663.732150)

|   |              |             |              |
|---|--------------|-------------|--------------|
| 6 | -0.151547000 | 1.863011000 | 0.641007000  |
| 6 | 1.902372000  | 2.611380000 | -0.218673000 |
| 7 | 0.212448000  | 0.822620000 | -0.215091000 |
| 7 | 0.784630000  | 2.792797000 | 0.760595000  |
| 6 | 0.568009000  | 4.009402000 | 1.500389000  |
| 1 | 0.108898000  | 4.793972000 | 0.888600000  |
| 1 | -0.080726000 | 3.812917000 | 2.354779000  |

|    |              |              |              |
|----|--------------|--------------|--------------|
| 1  | 1.518608000  | 4.385629000  | 1.880866000  |
| 15 | -1.241314000 | 0.118640000  | 0.161824000  |
| 6  | -1.421852000 | 1.557929000  | 1.126260000  |
| 7  | -2.163911000 | -0.142453000 | -1.182160000 |
| 7  | -1.257212000 | -1.325952000 | 0.958236000  |
| 6  | -0.094305000 | -0.730203000 | 3.118566000  |
| 1  | 0.866901000  | -1.046354000 | 2.710330000  |
| 1  | -0.177185000 | 0.353005000  | 3.004173000  |
| 1  | -0.104478000 | -0.962495000 | 4.185937000  |
| 6  | -2.583909000 | -1.140454000 | 3.038366000  |
| 1  | -3.367589000 | -1.749766000 | 2.583031000  |
| 1  | -2.576123000 | -1.343516000 | 4.111649000  |
| 1  | -2.845559000 | -0.090212000 | 2.902397000  |
| 6  | -2.004375000 | -3.660326000 | 0.527501000  |
| 1  | -3.031949000 | -3.296169000 | 0.463537000  |
| 1  | -1.892416000 | -4.484134000 | -0.180778000 |
| 1  | -1.851123000 | -4.074558000 | 1.527014000  |
| 6  | 0.429025000  | -3.040078000 | 0.347587000  |
| 1  | 1.129599000  | -2.263932000 | 0.030210000  |
| 1  | 0.661980000  | -3.302069000 | 1.384029000  |
| 1  | 0.600473000  | -3.929703000 | -0.262527000 |
| 6  | -4.060810000 | -1.644885000 | -1.752593000 |
| 1  | -5.057456000 | -1.946410000 | -1.423253000 |
| 1  | -4.134066000 | -1.396643000 | -2.814107000 |
| 1  | -3.393818000 | -2.502381000 | -1.650394000 |
| 6  | -4.479861000 | 0.746072000  | -1.110733000 |
| 1  | -4.140832000 | 1.581408000  | -0.493803000 |
| 1  | -4.496164000 | 1.077186000  | -2.152428000 |
| 1  | -5.506088000 | 0.501327000  | -0.828261000 |
| 6  | -2.392463000 | 2.242269000  | 2.016497000  |
| 1  | -2.178446000 | 2.120021000  | 3.087126000  |
| 1  | -2.434520000 | 3.317175000  | 1.818825000  |
| 1  | -3.405517000 | 1.863261000  | 1.855559000  |
| 6  | -1.231876000 | -1.460519000 | 2.432761000  |
| 6  | -1.003248000 | -2.569510000 | 0.193933000  |
| 1  | -1.052879000 | -2.525431000 | 2.604337000  |
| 1  | -1.152431000 | -2.302843000 | -0.855611000 |
| 6  | -3.581849000 | -0.463960000 | -0.927892000 |
| 1  | -3.636610000 | -0.760632000 | 0.127719000  |
| 6  | -1.803231000 | 0.261106000  | -2.556901000 |
| 1  | -2.706185000 | 0.061374000  | -3.142177000 |
| 6  | -0.705823000 | -0.626280000 | -3.111746000 |
| 1  | -1.027137000 | -1.670351000 | -3.137608000 |
| 1  | -0.450858000 | -0.323464000 | -4.129872000 |
| 1  | 0.206114000  | -0.554288000 | -2.513353000 |
| 6  | -1.497933000 | 1.738949000  | -2.715662000 |

|   |              |              |              |
|---|--------------|--------------|--------------|
| 1 | -2.276080000 | 2.353940000  | -2.258853000 |
| 1 | -0.540315000 | 1.992332000  | -2.262962000 |
| 1 | -1.442896000 | 1.989852000  | -3.777386000 |
| 5 | 1.651780000  | 1.065360000  | -0.820976000 |
| 6 | 1.754161000  | 3.655868000  | -1.316034000 |
| 1 | 1.861902000  | 4.677983000  | -0.932365000 |
| 1 | 2.526664000  | 3.503439000  | -2.073244000 |
| 1 | 0.784729000  | 3.579216000  | -1.814997000 |
| 6 | 3.236270000  | 2.823303000  | 0.471970000  |
| 1 | 4.043823000  | 2.550856000  | -0.212508000 |
| 1 | 3.394811000  | 3.869985000  | 0.757528000  |
| 1 | 3.342899000  | 2.204480000  | 1.364061000  |
| 6 | 2.673789000  | -0.085804000 | -0.347268000 |
| 6 | 3.344416000  | -0.871085000 | -1.281935000 |
| 6 | 2.885172000  | -0.393076000 | 1.000318000  |
| 6 | 4.164071000  | -1.904480000 | -0.872258000 |
| 1 | 3.219646000  | -0.687193000 | -2.345210000 |
| 6 | 3.708357000  | -1.429558000 | 1.400502000  |
| 1 | 2.373260000  | 0.195049000  | 1.757343000  |
| 6 | 4.362282000  | -2.209518000 | 0.456241000  |
| 1 | 3.844066000  | -1.643028000 | 2.455927000  |
| 1 | 1.625376000  | 1.101347000  | -2.040913000 |
| 1 | 5.011497000  | -3.031029000 | 0.733241000  |
| 9 | 4.786475000  | -2.645774000 | -1.802262000 |

**5P<sup>o(C-F)</sup>** (TE= -1663.731639)

|    |              |              |              |
|----|--------------|--------------|--------------|
| 6  | 0.183759000  | 1.717619000  | 0.830546000  |
| 6  | 2.330547000  | 2.217378000  | 0.012621000  |
| 7  | 0.382088000  | 0.714038000  | -0.118016000 |
| 7  | 1.251933000  | 2.478283000  | 1.018255000  |
| 6  | 1.225438000  | 3.640321000  | 1.868734000  |
| 1  | 0.894441000  | 4.539298000  | 1.336839000  |
| 1  | 0.552552000  | 3.468456000  | 2.709643000  |
| 1  | 2.222146000  | 3.828661000  | 2.270100000  |
| 15 | -1.168403000 | 0.221846000  | 0.203164000  |
| 6  | -1.120316000 | 1.573130000  | 1.301331000  |
| 7  | -2.114155000 | 0.239257000  | -1.149796000 |
| 7  | -1.419298000 | -1.270952000 | 0.859820000  |
| 6  | -0.202094000 | -1.077739000 | 3.064667000  |
| 1  | 0.701505000  | -1.505215000 | 2.626989000  |
| 1  | -0.108653000 | 0.010572000  | 3.055655000  |
| 1  | -0.263971000 | -1.406129000 | 4.104742000  |
| 6  | -2.723466000 | -1.069041000 | 2.951722000  |
| 1  | -3.589584000 | -1.500078000 | 2.444739000  |
| 1  | -2.761166000 | -1.367343000 | 4.001868000  |
| 1  | -2.810863000 | 0.017801000  | 2.913015000  |

|   |              |              |              |
|---|--------------|--------------|--------------|
| 6 | -2.524397000 | -3.405905000 | 0.215807000  |
| 1 | -3.480623000 | -2.878523000 | 0.201817000  |
| 1 | -2.543323000 | -4.162322000 | -0.571816000 |
| 1 | -2.441744000 | -3.936988000 | 1.167270000  |
| 6 | -0.022922000 | -3.165289000 | 0.074660000  |
| 1 | 0.794360000  | -2.485049000 | -0.176564000 |
| 1 | 0.159272000  | -3.555436000 | 1.080484000  |
| 1 | 0.007595000  | -4.010723000 | -0.616307000 |
| 6 | -4.220012000 | -0.885165000 | -1.842774000 |
| 1 | -5.255282000 | -1.052645000 | -1.538083000 |
| 1 | -4.241646000 | -0.530057000 | -2.875805000 |
| 1 | -3.700096000 | -1.844349000 | -1.825107000 |
| 6 | -4.262364000 | 1.468844000  | -0.969176000 |
| 1 | -3.799105000 | 2.176776000  | -0.278052000 |
| 1 | -4.221852000 | 1.898139000  | -1.973719000 |
| 1 | -5.315541000 | 1.361719000  | -0.700411000 |
| 6 | -1.976652000 | 2.320519000  | 2.255735000  |
| 1 | -1.797843000 | 2.066308000  | 3.309506000  |
| 1 | -1.841196000 | 3.401594000  | 2.159613000  |
| 1 | -3.035952000 | 2.127883000  | 2.063685000  |
| 6 | -1.433481000 | -1.546259000 | 2.314645000  |
| 6 | -1.360900000 | -2.460411000 | -0.021234000 |
| 1 | -1.430989000 | -2.637433000 | 2.384130000  |
| 1 | -1.458814000 | -2.074369000 | -1.039281000 |
| 6 | -3.566211000 | 0.121061000  | -0.913200000 |
| 1 | -3.672383000 | -0.263763000 | 0.109407000  |
| 6 | -1.688285000 | 0.715906000  | -2.482281000 |
| 1 | -2.609402000 | 0.720997000  | -3.073256000 |
| 6 | -0.744550000 | -0.274817000 | -3.135942000 |
| 1 | -1.229618000 | -1.246057000 | -3.260677000 |
| 1 | -0.440785000 | 0.083256000  | -4.122151000 |
| 1 | 0.166523000  | -0.409544000 | -2.547493000 |
| 6 | -1.153198000 | 2.135762000  | -2.496780000 |
| 1 | -1.827318000 | 2.816422000  | -1.972559000 |
| 1 | -0.169129000 | 2.189596000  | -2.033242000 |
| 1 | -1.054739000 | 2.479368000  | -3.529004000 |
| 5 | 1.831411000  | 0.803047000  | -0.746080000 |
| 6 | 2.359994000  | 3.378103000  | -0.971678000 |
| 1 | 2.635015000  | 4.324379000  | -0.489415000 |
| 1 | 3.097345000  | 3.177018000  | -1.752093000 |
| 1 | 1.392230000  | 3.512718000  | -1.461322000 |
| 6 | 3.677111000  | 2.141569000  | 0.707553000  |
| 1 | 4.436718000  | 1.821541000  | -0.010276000 |
| 1 | 3.995642000  | 3.114015000  | 1.101400000  |
| 1 | 3.680716000  | 1.422625000  | 1.528085000  |
| 6 | 2.665678000  | -0.535361000 | -0.395573000 |



|   |             |              |              |
|---|-------------|--------------|--------------|
| 6 | 3.257781000 | -1.358680000 | -1.339605000 |
| 6 | 2.780053000 | -0.991824000 | 0.920878000  |
| 6 | 3.903250000 | -2.547264000 | -1.042277000 |
| 6 | 3.420782000 | -2.167576000 | 1.267564000  |
| 1 | 2.324475000 | -0.393658000 | 1.705898000  |
| 6 | 3.984635000 | -2.956317000 | 0.275590000  |
| 1 | 3.474507000 | -2.473558000 | 2.307017000  |
| 1 | 1.782607000 | 0.988058000  | -1.942943000 |
| 1 | 4.486604000 | -3.884077000 | 0.524815000  |
| 9 | 3.210203000 | -1.021722000 | -2.640747000 |
| 1 | 4.329465000 | -3.133071000 | -1.848508000 |

**6P<sup>p(C-F)</sup>** (TE= -1832.110292)

|    |              |              |              |
|----|--------------|--------------|--------------|
| 6  | -0.204650000 | -1.799043000 | 0.262999000  |
| 7  | -0.083956000 | -0.433601000 | -0.013651000 |
| 7  | 0.912720000  | -2.470167000 | -0.012544000 |
| 6  | 0.904701000  | -3.870509000 | -0.365759000 |
| 1  | 1.853980000  | -4.331553000 | -0.089418000 |
| 1  | 0.103542000  | -4.371907000 | 0.177078000  |
| 1  | 0.753750000  | -3.993587000 | -1.442734000 |
| 15 | -1.738077000 | -0.368271000 | 0.215788000  |
| 6  | -1.519354000 | -2.041686000 | 0.630343000  |
| 7  | -2.161813000 | 0.760067000  | 1.336194000  |
| 7  | -2.673757000 | -0.057434000 | -1.100825000 |
| 6  | -2.047334000 | -2.014310000 | -2.582485000 |
| 1  | -1.166204000 | -1.445659000 | -2.889456000 |
| 1  | -1.733281000 | -2.750136000 | -1.839485000 |
| 1  | -2.428239000 | -2.557179000 | -3.450478000 |
| 6  | -4.310938000 | -1.869194000 | -1.477447000 |
| 1  | -5.126126000 | -1.193857000 | -1.208768000 |
| 1  | -4.687949000 | -2.585667000 | -2.210811000 |
| 1  | -4.023505000 | -2.428937000 | -0.585359000 |
| 6  | -4.228083000 | 1.720847000  | -1.866471000 |
| 1  | -4.879218000 | 1.502478000  | -1.017311000 |
| 1  | -4.289089000 | 2.791224000  | -2.074475000 |
| 1  | -4.624020000 | 1.199846000  | -2.741706000 |
| 6  | -1.873004000 | 1.616012000  | -2.751338000 |
| 1  | -0.838910000 | 1.363695000  | -2.504648000 |
| 1  | -2.161331000 | 1.038196000  | -3.633908000 |
| 1  | -1.917718000 | 2.673332000  | -3.021070000 |
| 6  | -4.215630000 | 2.068055000  | 1.822754000  |
| 1  | -5.278821000 | 1.968655000  | 2.051075000  |
| 1  | -3.778919000 | 2.712018000  | 2.589831000  |
| 1  | -4.119066000 | 2.573721000  | 0.860724000  |
| 6  | -3.685687000 | -0.004806000 | 3.139665000  |
| 1  | -3.233180000 | -0.998423000 | 3.103524000  |

|   |              |              |              |
|---|--------------|--------------|--------------|
| 1 | -3.196717000 | 0.561951000  | 3.936191000  |
| 1 | -4.737181000 | -0.114325000 | 3.413278000  |
| 6 | -2.259136000 | -3.222728000 | 1.137174000  |
| 1 | -2.500586000 | -3.957946000 | 0.358330000  |
| 1 | -1.697852000 | -3.748537000 | 1.915095000  |
| 1 | -3.208052000 | -2.921769000 | 1.588966000  |
| 6 | -3.135802000 | -1.100829000 | -2.046917000 |
| 6 | -2.788544000 | 1.342253000  | -1.575084000 |
| 1 | -3.507493000 | -0.536379000 | -2.906104000 |
| 1 | -2.448510000 | 1.963284000  | -0.741793000 |
| 6 | -3.563166000 | 0.698710000  | 1.800307000  |
| 1 | -4.098980000 | 0.092532000  | 1.057375000  |
| 6 | -1.208397000 | 1.537223000  | 2.160546000  |
| 1 | -1.838009000 | 2.027025000  | 2.909943000  |
| 6 | -0.562227000 | 2.633997000  | 1.337782000  |
| 1 | -1.319873000 | 3.318137000  | 0.947972000  |
| 1 | 0.136341000  | 3.210976000  | 1.948043000  |
| 1 | 0.002792000  | 2.225460000  | 0.496233000  |
| 6 | -0.208339000 | 0.690168000  | 2.927842000  |
| 1 | -0.716952000 | -0.064143000 | 3.531965000  |
| 1 | 0.488985000  | 0.184261000  | 2.259553000  |
| 1 | 0.370129000  | 1.329865000  | 3.598392000  |
| 5 | 1.099222000  | -0.278983000 | -1.068768000 |
| 7 | 1.836912000  | -1.638330000 | -0.686179000 |
| 6 | 3.133716000  | -1.719407000 | -0.193289000 |
| 6 | 4.167371000  | -1.171355000 | -0.960946000 |
| 6 | 3.462503000  | -2.321893000 | 1.023011000  |
| 6 | 5.469099000  | -1.191220000 | -0.507423000 |
| 1 | 3.921265000  | -0.718288000 | -1.914840000 |
| 6 | 4.776846000  | -2.348840000 | 1.461348000  |
| 1 | 2.676505000  | -2.743988000 | 1.638779000  |
| 6 | 5.789498000  | -1.780190000 | 0.709340000  |
| 1 | 6.249009000  | -0.747662000 | -1.116615000 |
| 1 | 5.005996000  | -2.815185000 | 2.413724000  |
| 1 | 6.814753000  | -1.801265000 | 1.058588000  |
| 6 | 1.942141000  | 1.055409000  | -0.809392000 |
| 6 | 2.570918000  | 1.319561000  | 0.410407000  |
| 6 | 2.005417000  | 2.055517000  | -1.774674000 |
| 6 | 3.220871000  | 2.513004000  | 0.665018000  |
| 1 | 2.553463000  | 0.564900000  | 1.192534000  |
| 6 | 2.641275000  | 3.269620000  | -1.548216000 |
| 1 | 1.536502000  | 1.881915000  | -2.739324000 |
| 6 | 3.237913000  | 3.475358000  | -0.325232000 |
| 1 | 3.710781000  | 2.708818000  | 1.611700000  |
| 1 | 2.682172000  | 4.046526000  | -2.302654000 |
| 1 | 0.667778000  | -0.316955000 | -2.211959000 |

9 3.857831000 4.640158000 -0.088122000

**6P<sup>m</sup>(C-F)** (TE= -1832.111019)

|    |              |              |              |
|----|--------------|--------------|--------------|
| 6  | -0.097255000 | -1.807930000 | 0.105927000  |
| 7  | -0.039427000 | -0.414840000 | 0.003664000  |
| 7  | 1.063665000  | -2.387423000 | -0.200643000 |
| 6  | 1.126444000  | -3.727448000 | -0.738814000 |
| 1  | 2.095428000  | -4.174620000 | -0.513849000 |
| 1  | 0.347780000  | -4.334493000 | -0.277416000 |
| 1  | 0.989111000  | -3.712429000 | -1.824503000 |
| 15 | -1.702571000 | -0.456787000 | 0.169742000  |
| 6  | -1.409544000 | -2.157279000 | 0.382730000  |
| 7  | -2.225792000 | 0.498554000  | 1.403159000  |
| 7  | -2.603905000 | -0.025191000 | -1.136213000 |
| 6  | -1.819837000 | -1.743543000 | -2.823187000 |
| 1  | -0.958799000 | -1.099155000 | -3.016580000 |
| 1  | -1.497353000 | -2.552471000 | -2.164944000 |
| 1  | -2.137555000 | -2.188512000 | -3.768777000 |
| 6  | -4.126761000 | -1.850548000 | -1.807377000 |
| 1  | -4.987890000 | -1.255421000 | -1.496006000 |
| 1  | -4.434851000 | -2.489279000 | -2.638263000 |
| 1  | -3.843571000 | -2.500433000 | -0.977092000 |
| 6  | -4.219892000 | 1.761727000  | -1.737298000 |
| 1  | -4.889456000 | 1.407538000  | -0.950456000 |
| 1  | -4.328272000 | 2.845811000  | -1.812427000 |
| 1  | -4.556156000 | 1.338324000  | -2.686961000 |
| 6  | -1.831174000 | 1.881564000  | -2.525908000 |
| 1  | -0.795621000 | 1.647603000  | -2.267842000 |
| 1  | -2.055616000 | 1.408266000  | -3.485874000 |
| 1  | -1.919764000 | 2.961394000  | -2.662319000 |
| 6  | -4.358596000 | 1.641972000  | 1.959565000  |
| 1  | -5.424021000 | 1.467837000  | 2.123569000  |
| 1  | -3.985311000 | 2.198527000  | 2.822525000  |
| 1  | -4.247938000 | 2.272450000  | 1.075967000  |
| 6  | -3.780954000 | -0.559314000 | 3.023189000  |
| 1  | -3.276799000 | -1.518175000 | 2.882603000  |
| 1  | -3.355558000 | -0.078368000 | 3.907778000  |
| 1  | -4.835846000 | -0.751313000 | 3.230229000  |
| 6  | -2.103814000 | -3.427959000 | 0.702889000  |
| 1  | -2.278320000 | -4.065879000 | -0.173491000 |
| 1  | -1.542869000 | -4.023335000 | 1.429107000  |
| 1  | -3.082521000 | -3.234568000 | 1.149819000  |
| 6  | -2.974749000 | -0.959612000 | -2.225536000 |
| 6  | -2.774208000 | 1.417139000  | -1.434512000 |
| 1  | -3.344581000 | -0.308343000 | -3.021884000 |
| 1  | -2.498009000 | 1.941198000  | -0.515433000 |

|   |              |              |              |
|---|--------------|--------------|--------------|
| 6 | -3.639948000 | 0.316607000  | 1.791673000  |
| 1 | -4.116002000 | -0.210431000 | 0.953909000  |
| 6 | -1.345280000 | 1.202018000  | 2.364054000  |
| 1 | -2.028401000 | 1.563558000  | 3.138896000  |
| 6 | -0.718433000 | 2.422021000  | 1.719148000  |
| 1 | -1.490421000 | 3.119579000  | 1.385382000  |
| 1 | -0.071868000 | 2.942536000  | 2.429279000  |
| 1 | -0.101217000 | 2.149892000  | 0.859557000  |
| 6 | -0.338948000 | 0.305521000  | 3.063262000  |
| 1 | -0.834616000 | -0.546068000 | 3.534133000  |
| 1 | 0.414172000  | -0.071335000 | 2.371244000  |
| 1 | 0.174229000  | 0.874431000  | 3.842042000  |
| 5 | 1.174057000  | -0.067817000 | -0.962602000 |
| 7 | 1.956732000  | -1.434306000 | -0.744348000 |
| 6 | 3.257939000  | -1.535239000 | -0.272277000 |
| 6 | 4.262241000  | -0.833788000 | -0.949066000 |
| 6 | 3.621009000  | -2.302536000 | 0.836840000  |
| 6 | 5.567664000  | -0.871069000 | -0.507861000 |
| 1 | 3.990637000  | -0.249952000 | -1.821689000 |
| 6 | 4.939185000  | -2.343012000 | 1.262099000  |
| 1 | 2.857477000  | -2.843048000 | 1.384382000  |
| 6 | 5.922229000  | -1.626553000 | 0.602889000  |
| 1 | 6.323825000  | -0.308130000 | -1.044031000 |
| 1 | 5.194718000  | -2.939379000 | 2.131614000  |
| 1 | 6.950668000  | -1.659853000 | 0.941628000  |
| 6 | 1.950892000  | 1.242487000  | -0.463632000 |
| 6 | 2.518917000  | 1.334763000  | 0.810193000  |
| 6 | 2.003748000  | 2.375840000  | -1.268111000 |
| 6 | 3.103142000  | 2.501518000  | 1.264851000  |
| 1 | 2.502682000  | 0.465960000  | 1.462545000  |
| 6 | 2.582572000  | 3.538952000  | -0.798939000 |
| 1 | 1.588552000  | 2.361818000  | -2.271493000 |
| 6 | 3.135228000  | 3.631610000  | 0.458431000  |
| 1 | 3.539310000  | 2.541788000  | 2.256985000  |
| 1 | 0.795123000  | 0.054829000  | -2.118115000 |
| 1 | 3.582974000  | 4.562082000  | 0.785696000  |
| 9 | 2.607887000  | 4.617273000  | -1.597026000 |

**6P<sup>o(C-F)</sup>** (TE= -1832.109818)

|   |              |              |              |
|---|--------------|--------------|--------------|
| 6 | -0.081684000 | -1.738376000 | -0.254020000 |
| 7 | -0.006434000 | -0.358547000 | -0.001226000 |
| 7 | 1.067227000  | -2.229312000 | -0.709665000 |
| 6 | 1.177780000  | -3.446803000 | -1.472476000 |
| 1 | 2.120203000  | -3.947731000 | -1.243232000 |
| 1 | 0.355957000  | -4.112419000 | -1.208850000 |
| 1 | 1.145886000  | -3.229631000 | -2.544316000 |

|    |              |              |              |
|----|--------------|--------------|--------------|
| 15 | -1.677007000 | -0.431399000 | 0.121836000  |
| 6  | -1.396839000 | -2.133743000 | -0.067676000 |
| 7  | -2.224085000 | 0.219574000  | 1.534202000  |
| 7  | -2.543275000 | 0.309246000  | -1.063405000 |
| 6  | -1.938447000 | -1.068814000 | -3.098541000 |
| 1  | -1.054685000 | -0.437858000 | -3.213126000 |
| 1  | -1.625638000 | -2.002958000 | -2.628398000 |
| 1  | -2.327123000 | -1.306549000 | -4.091426000 |
| 6  | -4.203464000 | -1.259990000 | -2.003861000 |
| 1  | -5.019703000 | -0.693132000 | -1.550798000 |
| 1  | -4.573800000 | -1.713060000 | -2.926235000 |
| 1  | -3.932171000 | -2.070263000 | -1.323536000 |
| 6  | -4.046809000 | 2.283358000  | -1.203680000 |
| 1  | -4.714459000 | 1.822622000  | -0.473032000 |
| 1  | -4.077189000 | 3.364786000  | -1.054707000 |
| 1  | -4.445759000 | 2.085555000  | -2.201725000 |
| 6  | -1.696062000 | 2.412615000  | -2.081835000 |
| 1  | -0.667499000 | 2.074368000  | -1.943956000 |
| 1  | -2.000128000 | 2.161847000  | -3.101968000 |
| 1  | -1.719250000 | 3.500667000  | -1.991386000 |
| 6  | -4.268059000 | 1.379315000  | 2.334470000  |
| 1  | -5.354578000 | 1.285927000  | 2.393642000  |
| 1  | -3.908378000 | 1.611697000  | 3.339672000  |
| 1  | -4.033929000 | 2.225159000  | 1.685771000  |
| 6  | -3.975659000 | -1.088902000 | 2.708666000  |
| 1  | -3.571498000 | -2.015577000 | 2.294060000  |
| 1  | -3.549466000 | -0.950828000 | 3.705762000  |
| 1  | -5.054890000 | -1.206728000 | 2.826317000  |
| 6  | -2.096184000 | -3.441364000 | -0.064565000 |
| 1  | -2.310120000 | -3.831032000 | -1.068450000 |
| 1  | -1.515634000 | -4.204895000 | 0.460969000  |
| 1  | -3.055447000 | -3.370744000 | 0.454986000  |
| 6  | -3.016217000 | -0.364022000 | -2.294782000 |
| 6  | -2.619431000 | 1.790509000  | -1.053702000 |
| 1  | -3.378775000 | 0.453658000  | -2.923488000 |
| 1  | -2.266566000 | 2.096052000  | -0.063341000 |
| 6  | -3.671193000 | 0.090062000  | 1.802369000  |
| 1  | -4.138349000 | -0.110519000 | 0.831208000  |
| 6  | -1.362406000 | 0.539780000  | 2.695408000  |
| 1  | -2.063265000 | 0.671883000  | 3.525179000  |
| 6  | -0.665520000 | 1.867363000  | 2.479135000  |
| 1  | -1.395912000 | 2.674846000  | 2.390058000  |
| 1  | 0.000136000  | 2.098228000  | 3.314633000  |
| 1  | -0.060043000 | 1.852421000  | 1.571156000  |
| 6  | -0.420555000 | -0.575354000 | 3.114279000  |
| 1  | -0.962260000 | -1.513000000 | 3.256892000  |

|   |             |              |              |
|---|-------------|--------------|--------------|
| 1 | 0.366284000 | -0.742019000 | 2.378011000  |
| 1 | 0.052913000 | -0.309359000 | 4.061901000  |
| 5 | 1.149805000 | 0.157739000  | -0.983490000 |
| 7 | 1.990103000 | -1.197444000 | -0.983077000 |
| 6 | 3.207611000 | -1.350373000 | -0.315660000 |
| 6 | 4.295966000 | -0.587137000 | -0.749784000 |
| 6 | 3.397282000 | -2.223502000 | 0.755422000  |
| 6 | 5.510916000 | -0.659225000 | -0.101776000 |
| 1 | 4.162058000 | 0.071719000  | -1.600799000 |
| 6 | 4.627581000 | -2.301331000 | 1.389310000  |
| 1 | 2.567062000 | -2.826491000 | 1.105713000  |
| 6 | 5.689372000 | -1.516032000 | 0.976956000  |
| 1 | 6.334538000 | -0.045102000 | -0.449037000 |
| 1 | 4.749523000 | -2.981575000 | 2.225537000  |
| 1 | 6.647467000 | -1.576846000 | 1.479104000  |
| 6 | 1.964017000 | 1.401952000  | -0.389459000 |
| 6 | 2.381373000 | 1.430400000  | 0.944132000  |
| 6 | 2.366914000 | 2.487464000  | -1.148855000 |
| 6 | 3.137396000 | 2.459387000  | 1.474458000  |
| 1 | 2.110648000 | 0.594985000  | 1.584294000  |
| 6 | 3.121129000 | 3.539248000  | -0.660584000 |
| 6 | 3.510526000 | 3.522207000  | 0.665748000  |
| 1 | 3.443466000 | 2.429756000  | 2.513984000  |
| 1 | 0.689871000 | 0.353155000  | -2.088355000 |
| 1 | 4.106452000 | 4.335423000  | 1.063922000  |
| 1 | 3.396745000 | 4.347859000  | -1.327314000 |
| 9 | 2.041404000 | 2.541245000  | -2.451976000 |

**7Pp<sup>(C-F)</sup>** (TE= -930.263069)

|   |              |              |              |
|---|--------------|--------------|--------------|
| 6 | -0.154481000 | -2.486009000 | -1.207140000 |
| 6 | 1.060077000  | -1.923946000 | -1.198789000 |
| 1 | -0.565115000 | -3.246552000 | -1.853506000 |
| 1 | 1.844595000  | -2.187894000 | -1.894980000 |
| 6 | -2.419265000 | -1.891329000 | -0.242382000 |
| 6 | -1.940539000 | -2.755002000 | 0.566124000  |
| 7 | -0.942406000 | -1.923337000 | -0.139380000 |
| 7 | 1.252099000  | -0.981809000 | -0.229928000 |
| 5 | -0.055134000 | -0.776320000 | 0.588497000  |
| 6 | 2.431205000  | -0.285390000 | -0.040662000 |
| 6 | 3.546146000  | -0.422908000 | -0.875830000 |
| 6 | 2.526954000  | 0.608452000  | 1.032740000  |
| 6 | 4.699296000  | 0.301486000  | -0.639899000 |
| 1 | 3.519175000  | -1.095993000 | -1.723867000 |
| 6 | 3.685251000  | 1.326765000  | 1.256550000  |
| 1 | 1.676616000  | 0.733570000  | 1.692467000  |
| 6 | 4.784808000  | 1.183216000  | 0.425400000  |

|   |              |              |              |
|---|--------------|--------------|--------------|
| 1 | 5.545373000  | 0.173411000  | -1.306356000 |
| 1 | 3.725977000  | 2.011055000  | 2.096928000  |
| 1 | 5.691029000  | 1.749252000  | 0.602889000  |
| 6 | -1.814909000 | -3.817633000 | 1.550377000  |
| 1 | -1.290406000 | -3.443072000 | 2.433041000  |
| 1 | -2.792138000 | -4.194259000 | 1.848060000  |
| 1 | -1.225836000 | -4.641250000 | 1.139419000  |
| 6 | -3.352269000 | -1.111535000 | -1.043938000 |
| 1 | -4.354299000 | -1.535634000 | -0.995587000 |
| 1 | -3.383797000 | -0.076124000 | -0.695298000 |
| 1 | -3.017670000 | -1.098186000 | -2.084529000 |
| 6 | -0.767952000 | 0.635114000  | 0.356526000  |
| 6 | -1.633557000 | 1.168660000  | 1.308931000  |
| 6 | -0.638669000 | 1.329337000  | -0.846783000 |
| 6 | -2.357768000 | 2.329323000  | 1.079447000  |
| 1 | -1.746025000 | 0.657079000  | 2.261458000  |
| 6 | -1.344560000 | 2.492913000  | -1.103444000 |
| 1 | 0.038420000  | 0.948532000  | -1.607464000 |
| 6 | -2.199313000 | 2.970138000  | -0.130784000 |
| 1 | -3.029503000 | 2.744908000  | 1.821382000  |
| 1 | -1.240362000 | 3.034905000  | -2.036063000 |
| 1 | 0.042743000  | -1.068723000 | 1.765819000  |
| 9 | -2.888188000 | 4.093630000  | -0.366646000 |

**7P<sup>m</sup>(C-F)** (TE= -930.263769)

|   |              |              |              |
|---|--------------|--------------|--------------|
| 6 | -0.163944000 | -2.583560000 | -0.983219000 |
| 6 | 1.073011000  | -2.073181000 | -0.965439000 |
| 1 | -0.566151000 | -3.416524000 | -1.539236000 |
| 1 | 1.890763000  | -2.467678000 | -1.553217000 |
| 6 | -2.459200000 | -1.765589000 | -0.289591000 |
| 6 | -2.079796000 | -2.515016000 | 0.671070000  |
| 7 | -0.995987000 | -1.837066000 | -0.072514000 |
| 7 | 1.242433000  | -1.004586000 | -0.133054000 |
| 5 | -0.103931000 | -0.636179000 | 0.549891000  |
| 6 | 2.437186000  | -0.332141000 | 0.044406000  |
| 6 | 3.599724000  | -0.628668000 | -0.676396000 |
| 6 | 2.499479000  | 0.702563000  | 0.985490000  |
| 6 | 4.766273000  | 0.079650000  | -0.457653000 |
| 1 | 3.600059000  | -1.414731000 | -1.421456000 |
| 6 | 3.671508000  | 1.402965000  | 1.193432000  |
| 1 | 1.612253000  | 0.951984000  | 1.555318000  |
| 6 | 4.818492000  | 1.101439000  | 0.476622000  |
| 1 | 5.649871000  | -0.173442000 | -1.033539000 |
| 1 | 3.685328000  | 2.198957000  | 1.929841000  |
| 1 | 5.735710000  | 1.653521000  | 0.641034000  |
| 6 | -2.072372000 | -3.419615000 | 1.809105000  |

|   |              |              |              |
|---|--------------|--------------|--------------|
| 1 | -1.587429000 | -2.936263000 | 2.660995000  |
| 1 | -3.084801000 | -3.705830000 | 2.089217000  |
| 1 | -1.501083000 | -4.319706000 | 1.569002000  |
| 6 | -3.296738000 | -1.080299000 | -1.263948000 |
| 1 | -4.325000000 | -1.434865000 | -1.208304000 |
| 1 | -3.279011000 | -0.001234000 | -1.091427000 |
| 1 | -2.909156000 | -1.258922000 | -2.270380000 |
| 6 | -0.732424000 | 0.756004000  | 0.072058000  |
| 6 | -1.628299000 | 1.442397000  | 0.888002000  |
| 6 | -0.493059000 | 1.267671000  | -1.204254000 |
| 6 | -2.257641000 | 2.578865000  | 0.422637000  |
| 1 | -1.840926000 | 1.093589000  | 1.894694000  |
| 6 | -1.130328000 | 2.410810000  | -1.656147000 |
| 1 | 0.211880000  | 0.757215000  | -1.855039000 |
| 6 | -2.031121000 | 3.080737000  | -0.841480000 |
| 1 | -0.927448000 | 2.792051000  | -2.650817000 |
| 1 | -0.099126000 | -0.758268000 | 1.760514000  |
| 9 | -3.117041000 | 3.220339000  | 1.225414000  |
| 1 | -2.542333000 | 3.979361000  | -1.164581000 |

**7P<sup>o</sup>(C-F)** (TE= -930.264399)

|   |              |              |              |
|---|--------------|--------------|--------------|
| 6 | -0.539554000 | -2.415169000 | -1.073732000 |
| 6 | 0.752022000  | -2.066522000 | -1.052152000 |
| 1 | -1.043600000 | -3.183807000 | -1.639347000 |
| 1 | 1.515209000  | -2.565541000 | -1.633824000 |
| 6 | -2.696388000 | -1.239843000 | -0.479897000 |
| 6 | -2.499919000 | -2.042391000 | 0.492482000  |
| 7 | -1.278209000 | -1.557719000 | -0.180624000 |
| 7 | 1.055067000  | -1.029437000 | -0.218023000 |
| 5 | -0.228713000 | -0.527641000 | 0.503084000  |
| 6 | 2.333447000  | -0.549611000 | -0.002736000 |
| 6 | 3.445807000  | -0.976737000 | -0.737360000 |
| 6 | 2.538834000  | 0.416467000  | 0.989437000  |
| 6 | 4.702198000  | -0.461499000 | -0.480317000 |
| 1 | 3.335438000  | -1.712321000 | -1.524648000 |
| 6 | 3.799561000  | 0.924608000  | 1.234483000  |
| 1 | 1.693408000  | 0.763158000  | 1.571623000  |
| 6 | 4.896088000  | 0.492443000  | 0.505679000  |
| 1 | 5.543944000  | -0.812511000 | -1.067439000 |
| 1 | 3.924130000  | 1.671129000  | 2.011215000  |
| 1 | 5.883317000  | 0.893344000  | 0.700133000  |
| 6 | -2.713201000 | -2.910589000 | 1.638909000  |
| 1 | -2.220586000 | -2.483290000 | 2.516343000  |
| 1 | -3.775153000 | -3.028124000 | 1.848083000  |
| 1 | -2.273662000 | -3.893994000 | 1.456184000  |
| 6 | -3.349607000 | -0.428138000 | -1.497571000 |



|   |              |              |              |
|---|--------------|--------------|--------------|
| 1 | -4.420665000 | -0.624611000 | -1.520354000 |
| 1 | -3.185394000 | 0.635403000  | -1.306534000 |
| 1 | -2.922448000 | -0.656573000 | -2.477655000 |
| 6 | -0.664402000 | 0.962213000  | 0.098036000  |
| 6 | -1.542297000 | 1.722372000  | 0.852945000  |
| 6 | -0.259897000 | 1.537437000  | -1.108023000 |
| 6 | -2.011128000 | 2.965644000  | 0.474320000  |
| 6 | -0.706009000 | 2.779960000  | -1.526217000 |
| 1 | 0.432862000  | 0.981976000  | -1.735137000 |
| 6 | -1.587356000 | 3.496603000  | -0.731730000 |
| 1 | -0.365144000 | 3.192194000  | -2.468879000 |
| 1 | -0.211545000 | -0.735270000 | 1.696325000  |
| 1 | -1.942904000 | 4.471114000  | -1.045665000 |
| 9 | -1.994869000 | 1.232823000  | 2.021328000  |
| 1 | -2.697020000 | 3.497122000  | 1.123405000  |

**9P<sup>p(C-F)</sup>** (TE= -1700.531383)

|    |              |              |              |
|----|--------------|--------------|--------------|
| 6  | -0.177744000 | 1.530646000  | -1.313810000 |
| 7  | 0.138080000  | 0.488943000  | -0.361366000 |
| 15 | -1.472394000 | 0.112969000  | -0.378397000 |
| 6  | -1.540275000 | 1.293844000  | -1.615212000 |
| 7  | -1.772592000 | -1.497259000 | -0.676187000 |
| 7  | -2.318527000 | 0.374818000  | 1.030694000  |
| 6  | -1.778886000 | 2.829364000  | 1.303043000  |
| 1  | -0.838774000 | 2.545053000  | 1.783103000  |
| 1  | -1.560285000 | 3.078360000  | 0.262193000  |
| 1  | -2.161578000 | 3.726602000  | 1.796049000  |
| 6  | -4.098518000 | 2.053686000  | 0.694136000  |
| 1  | -4.849547000 | 1.278334000  | 0.862456000  |
| 1  | -4.500534000 | 3.004345000  | 1.053238000  |
| 1  | -3.936559000 | 2.144631000  | -0.381245000 |
| 6  | -3.584117000 | -0.879915000 | 2.760278000  |
| 1  | -4.327145000 | -1.147377000 | 2.005611000  |
| 1  | -3.502088000 | -1.710888000 | 3.464867000  |
| 1  | -3.962646000 | -0.020021000 | 3.319028000  |
| 6  | -1.189278000 | -0.221432000 | 3.164801000  |
| 1  | -0.210149000 | -0.082825000 | 2.698747000  |
| 1  | -1.451772000 | 0.708060000  | 3.678448000  |
| 1  | -1.104558000 | -1.003327000 | 3.923196000  |
| 6  | -3.624154000 | -3.087608000 | -0.230599000 |
| 1  | -4.695168000 | -3.246678000 | -0.375095000 |
| 1  | -3.110473000 | -3.971894000 | -0.616356000 |
| 1  | -3.430667000 | -3.024735000 | 0.841726000  |
| 6  | -3.486378000 | -1.896038000 | -2.437258000 |
| 1  | -3.174272000 | -0.978706000 | -2.941470000 |
| 1  | -2.974740000 | -2.737682000 | -2.911862000 |

|   |              |              |              |
|---|--------------|--------------|--------------|
| 1 | -4.558180000 | -2.032437000 | -2.598154000 |
| 6 | -2.486793000 | 2.007440000  | -2.502009000 |
| 1 | -2.647979000 | 3.057088000  | -2.212093000 |
| 1 | -2.151362000 | 2.017823000  | -3.545146000 |
| 1 | -3.469393000 | 1.526887000  | -2.499139000 |
| 6 | -2.807557000 | 1.716295000  | 1.413356000  |
| 6 | -2.230250000 | -0.608148000 | 2.130273000  |
| 1 | -3.048894000 | 1.629535000  | 2.476803000  |
| 1 | -1.896128000 | -1.537554000 | 1.663254000  |
| 6 | -3.184384000 | -1.825243000 | -0.949884000 |
| 1 | -3.770626000 | -0.993634000 | -0.536713000 |
| 6 | -0.760501000 | -2.449134000 | -1.172366000 |
| 1 | -1.335159000 | -3.325534000 | -1.490095000 |
| 6 | 0.139783000  | -2.903587000 | -0.039488000 |
| 1 | -0.449117000 | -3.386346000 | 0.744501000  |
| 1 | 0.885535000  | -3.618055000 | -0.397164000 |
| 1 | 0.678433000  | -2.063054000 | 0.402888000  |
| 6 | 0.008367000  | -1.973133000 | -2.393996000 |
| 1 | -0.669074000 | -1.737238000 | -3.216638000 |
| 1 | 0.595145000  | -1.081876000 | -2.172899000 |
| 1 | 0.690850000  | -2.759676000 | -2.726585000 |
| 5 | 1.391801000  | 0.865985000  | 0.452841000  |
| 6 | 0.853049000  | 2.391916000  | -1.483281000 |
| 1 | 0.909786000  | 3.313105000  | -2.044206000 |
| 6 | 3.284762000  | 2.502895000  | -0.736413000 |
| 6 | 2.622610000  | 3.222631000  | 0.086723000  |
| 7 | 1.883453000  | 2.092531000  | -0.498499000 |
| 6 | 4.348807000  | 2.082521000  | -1.639600000 |
| 1 | 5.126044000  | 2.843257000  | -1.706972000 |
| 1 | 4.797173000  | 1.144029000  | -1.306039000 |
| 1 | 3.930188000  | 1.914856000  | -2.635896000 |
| 6 | 2.218884000  | 4.286987000  | 0.992942000  |
| 1 | 1.993042000  | 3.875667000  | 1.980100000  |
| 1 | 2.992546000  | 5.046947000  | 1.091666000  |
| 1 | 1.304765000  | 4.753982000  | 0.615257000  |
| 6 | 2.500078000  | -0.283216000 | 0.540273000  |
| 6 | 3.017673000  | -0.877000000 | -0.612795000 |
| 6 | 2.937921000  | -0.790691000 | 1.759642000  |
| 6 | 3.915003000  | -1.928878000 | -0.565657000 |
| 1 | 2.692056000  | -0.512400000 | -1.584973000 |
| 6 | 3.829710000  | -1.851892000 | 1.843003000  |
| 1 | 2.557628000  | -0.349774000 | 2.677218000  |
| 6 | 4.300610000  | -2.403723000 | 0.672813000  |
| 1 | 4.310153000  | -2.390363000 | -1.463359000 |
| 1 | 4.160897000  | -2.251637000 | 2.794308000  |
| 1 | 1.158613000  | 1.348657000  | 1.553783000  |

9 5.160832000 -3.429191000 0.734382000

**9P<sup>m</sup>(C-F)** (TE= -1700.532552)

|    |              |              |              |
|----|--------------|--------------|--------------|
| 6  | -0.110790000 | 1.621582000  | -1.236844000 |
| 7  | 0.177950000  | 0.473785000  | -0.404819000 |
| 15 | -1.455597000 | 0.216842000  | -0.353290000 |
| 6  | -1.501636000 | 1.510262000  | -1.473021000 |
| 7  | -1.891908000 | -1.333545000 | -0.773138000 |
| 7  | -2.197412000 | 0.405720000  | 1.124131000  |
| 6  | -1.458701000 | 2.780301000  | 1.577934000  |
| 1  | -0.514960000 | 2.386155000  | 1.964114000  |
| 1  | -1.286393000 | 3.113327000  | 0.552059000  |
| 1  | -1.741109000 | 3.650095000  | 2.176466000  |
| 6  | -3.861653000 | 2.230199000  | 1.053883000  |
| 1  | -4.659147000 | 1.498285000  | 1.201234000  |
| 1  | -4.167746000 | 3.169531000  | 1.521094000  |
| 1  | -3.756567000 | 2.409350000  | -0.017458000 |
| 6  | -3.460579000 | -0.915802000 | 2.804514000  |
| 1  | -4.259257000 | -1.060040000 | 2.073366000  |
| 1  | -3.404091000 | -1.812340000 | 3.426324000  |
| 1  | -3.744869000 | -0.087362000 | 3.458529000  |
| 6  | -1.004641000 | -0.467333000 | 3.124524000  |
| 1  | -0.044119000 | -0.354501000 | 2.614814000  |
| 1  | -1.168456000 | 0.425269000  | 3.735335000  |
| 1  | -0.938642000 | -1.321622000 | 3.802271000  |
| 6  | -3.819963000 | -2.836570000 | -0.348920000 |
| 1  | -4.907307000 | -2.907346000 | -0.425917000 |
| 1  | -3.402047000 | -3.710091000 | -0.855857000 |
| 1  | -3.548586000 | -2.895803000 | 0.706702000  |
| 6  | -3.738422000 | -1.443975000 | -2.437727000 |
| 1  | -3.395685000 | -0.502483000 | -2.872650000 |
| 1  | -3.317053000 | -2.264492000 | -3.024725000 |
| 1  | -4.825130000 | -1.496191000 | -2.535753000 |
| 6  | -2.439348000 | 2.373442000  | -2.226117000 |
| 1  | -2.506967000 | 3.396718000  | -1.825803000 |
| 1  | -2.160072000 | 2.466959000  | -3.281503000 |
| 1  | -3.453119000 | 1.962998000  | -2.211001000 |
| 6  | -2.560558000 | 1.736563000  | 1.655114000  |
| 6  | -2.124883000 | -0.680732000 | 2.123186000  |
| 1  | -2.745556000 | 1.567980000  | 2.720052000  |
| 1  | -1.885824000 | -1.582759000 | 1.555010000  |
| 6  | -3.338111000 | -1.540540000 | -0.975363000 |
| 1  | -3.835106000 | -0.717135000 | -0.445464000 |
| 6  | -0.984715000 | -2.296987000 | -1.426028000 |
| 1  | -1.640836000 | -3.096301000 | -1.786395000 |
| 6  | -0.053559000 | -2.922197000 | -0.404930000 |

|   |              |              |              |
|---|--------------|--------------|--------------|
| 1 | -0.627293000 | -3.447238000 | 0.362935000  |
| 1 | 0.621059000  | -3.638785000 | -0.880255000 |
| 1 | 0.564697000  | -2.167305000 | 0.084806000  |
| 6 | -0.258402000 | -1.754299000 | -2.646134000 |
| 1 | -0.965496000 | -1.392816000 | -3.395309000 |
| 1 | 0.405978000  | -0.931860000 | -2.381685000 |
| 1 | 0.342362000  | -2.548532000 | -3.097038000 |
| 5 | 1.497178000  | 0.686481000  | 0.361175000  |
| 6 | 0.970115000  | 2.422412000  | -1.389024000 |
| 1 | 1.063037000  | 3.388933000  | -1.861917000 |
| 6 | 3.437721000  | 2.307580000  | -0.766871000 |
| 6 | 2.864923000  | 2.981028000  | 0.156351000  |
| 7 | 2.024990000  | 1.962842000  | -0.495824000 |
| 6 | 4.428466000  | 1.913677000  | -1.760767000 |
| 1 | 5.255755000  | 2.622321000  | -1.787569000 |
| 1 | 4.819125000  | 0.916108000  | -1.548290000 |
| 1 | 3.956757000  | 1.881964000  | -2.746863000 |
| 6 | 2.575371000  | 3.968078000  | 1.185177000  |
| 1 | 2.332660000  | 3.467672000  | 2.126321000  |
| 1 | 3.415830000  | 4.641774000  | 1.344694000  |
| 1 | 1.699861000  | 4.552927000  | 0.889138000  |
| 6 | 2.523066000  | -0.539762000 | 0.269824000  |
| 6 | 2.939042000  | -1.049678000 | -0.962705000 |
| 6 | 2.980311000  | -1.181505000 | 1.415728000  |
| 6 | 3.761031000  | -2.157892000 | -1.052991000 |
| 1 | 2.588534000  | -0.572159000 | -1.874979000 |
| 6 | 3.795074000  | -2.291914000 | 1.312746000  |
| 1 | 2.691708000  | -0.826230000 | 2.400711000  |
| 6 | 4.196694000  | -2.801362000 | 0.097818000  |
| 1 | 4.063629000  | -2.537429000 | -2.023038000 |
| 1 | 1.363822000  | 1.068730000  | 1.516377000  |
| 1 | 4.835303000  | -3.675581000 | 0.063011000  |
| 9 | 4.210990000  | -2.897199000 | 2.434330000  |

**9P<sup>o</sup>(C-F)** (TE= -1700.532219)

|    |              |              |              |
|----|--------------|--------------|--------------|
| 6  | 0.129306000  | 1.356366000  | -1.434547000 |
| 7  | 0.278295000  | 0.321325000  | -0.435453000 |
| 15 | -1.373339000 | 0.223476000  | -0.424817000 |
| 6  | -1.256326000 | 1.334243000  | -1.721888000 |
| 7  | -1.941597000 | -1.327131000 | -0.635130000 |
| 7  | -2.143090000 | 0.695193000  | 0.972484000  |
| 6  | -1.205372000 | 3.038403000  | 1.114420000  |
| 1  | -0.317288000 | 2.629256000  | 1.603494000  |
| 1  | -0.963916000 | 3.196009000  | 0.060886000  |
| 1  | -1.429718000 | 4.009836000  | 1.562358000  |
| 6  | -3.627424000 | 2.624907000  | 0.555638000  |

|   |              |              |              |
|---|--------------|--------------|--------------|
| 1 | -4.493747000 | 1.993557000  | 0.766240000  |
| 1 | -3.863344000 | 3.645753000  | 0.866333000  |
| 1 | -3.465564000 | 2.633615000  | -0.523572000 |
| 6 | -3.580761000 | -0.250281000 | 2.762134000  |
| 1 | -4.361770000 | -0.434482000 | 2.020924000  |
| 1 | -3.628551000 | -1.045405000 | 3.509919000  |
| 1 | -3.812919000 | 0.687417000  | 3.273774000  |
| 6 | -1.107848000 | 0.034412000  | 3.135657000  |
| 1 | -0.121025000 | -0.014396000 | 2.668500000  |
| 1 | -1.212797000 | 1.019965000  | 3.598682000  |
| 1 | -1.147087000 | -0.708969000 | 3.935276000  |
| 6 | -4.014895000 | -2.573705000 | -0.083650000 |
| 1 | -5.101416000 | -2.556258000 | -0.195448000 |
| 1 | -3.668565000 | -3.547201000 | -0.440053000 |
| 1 | -3.780645000 | -2.499686000 | 0.979804000  |
| 6 | -3.736791000 | -1.524524000 | -2.348066000 |
| 1 | -3.296333000 | -0.692461000 | -2.901870000 |
| 1 | -3.373932000 | -2.457259000 | -2.788179000 |
| 1 | -4.820133000 | -1.497613000 | -2.485776000 |
| 6 | -2.079607000 | 2.157356000  | -2.636294000 |
| 1 | -2.062285000 | 3.230607000  | -2.391564000 |
| 1 | -1.755985000 | 2.068037000  | -3.679344000 |
| 1 | -3.128079000 | 1.846676000  | -2.611411000 |
| 6 | -2.400771000 | 2.116185000  | 1.286720000  |
| 6 | -2.204749000 | -0.232285000 | 2.121816000  |
| 1 | -2.639673000 | 2.124218000  | 2.354215000  |
| 1 | -2.027157000 | -1.225772000 | 1.703207000  |
| 6 | -3.393339000 | -1.434081000 | -0.870848000 |
| 1 | -3.827741000 | -0.499992000 | -0.490712000 |
| 6 | -1.108697000 | -2.455790000 | -1.092218000 |
| 1 | -1.824820000 | -3.242449000 | -1.352713000 |
| 6 | -0.267319000 | -2.990351000 | 0.050944000  |
| 1 | -0.907129000 | -3.337593000 | 0.866089000  |
| 1 | 0.352551000  | -3.827437000 | -0.280152000 |
| 1 | 0.402670000  | -2.222768000 | 0.443479000  |
| 6 | -0.300753000 | -2.176327000 | -2.348662000 |
| 1 | -0.948152000 | -1.864089000 | -3.169904000 |
| 1 | 0.436699000  | -1.391864000 | -2.181612000 |
| 1 | 0.227676000  | -3.083430000 | -2.653534000 |
| 5 | 1.580952000  | 0.533149000  | 0.363538000  |
| 6 | 1.284175000  | 2.031816000  | -1.644001000 |
| 1 | 1.479272000  | 2.911803000  | -2.239185000 |
| 6 | 3.702764000  | 1.825573000  | -0.866756000 |
| 6 | 3.140318000  | 2.663270000  | -0.081840000 |
| 7 | 2.255462000  | 1.625956000  | -0.636804000 |
| 6 | 4.710948000  | 1.228190000  | -1.734129000 |

|   |             |              |              |
|---|-------------|--------------|--------------|
| 1 | 5.587764000 | 1.870768000  | -1.809435000 |
| 1 | 5.018267000 | 0.248427000  | -1.361906000 |
| 1 | 4.289550000 | 1.086025000  | -2.733166000 |
| 6 | 2.878625000 | 3.802091000  | 0.784561000  |
| 1 | 2.518433000 | 3.454773000  | 1.756575000  |
| 1 | 3.769203000 | 4.411801000  | 0.928425000  |
| 1 | 2.090865000 | 4.419710000  | 0.343942000  |
| 6 | 2.498027000 | -0.783461000 | 0.446400000  |
| 6 | 2.892360000 | -1.434453000 | -0.725517000 |
| 6 | 2.888458000 | -1.403277000 | 1.619919000  |
| 6 | 3.610910000 | -2.616033000 | -0.724897000 |
| 1 | 2.601442000 | -0.993205000 | -1.676741000 |
| 6 | 3.599997000 | -2.589499000 | 1.668895000  |
| 6 | 3.962377000 | -3.200892000 | 0.483480000  |
| 1 | 3.889153000 | -3.086982000 | -1.661022000 |
| 1 | 1.434657000 | 1.091948000  | 1.433727000  |
| 1 | 4.517863000 | -4.131361000 | 0.504070000  |
| 9 | 2.553131000 | -0.857415000 | 2.801171000  |
| 1 | 3.855688000 | -3.015188000 | 2.632099000  |
